# Supplementary material for: Ligand-assisted olefin-switched divergent oxidative Heck cascade with molecular oxygen enabled by self-assembled imines
Source: Royal Society of Chemistry journal article supplement (doi:10.1039/d3qo00316g), 2023-01-01
Supplement: d3qo00316g1.pdf [file d3qo00316g1.pdf]

## *Supporting Information*

### **Ligand Assisted, Olefins Switched Divergent Oxidative Heck Cascade with Molecular Oxygen Enabled by Self-Assembled Imines**

Bairong Liu,<sup>‡a</sup> Jianhang Rao,<sup>‡a</sup> Weibing Liu,<sup>b</sup> Yang Gao,<sup>a</sup> Yanping Huo,<sup>a</sup> Qian Chen,<sup>a</sup>  
Xianwei Li<sup>\*a</sup>

<sup>a</sup> School of Chemical Engineering and Light Industry, Guangdong University of Technology,  
Guangzhou, 510006, China.

<sup>b</sup> College of Chemical Engineering, Guangdong University of Petrochemical Technology, 2  
Guandu Road, Maoming 525000, P. R. China.

E-mail: [xwli@gdut.edu.cn](mailto:xwli@gdut.edu.cn)

### **Table of Contents**

|                                                           |     |
|-----------------------------------------------------------|-----|
| <b>A. General information</b> -----                       | S2  |
| <b>B. General procedure</b> -----                         | S3  |
| <b>C. Synthetic applications</b> -----                    | S4  |
| <b>D. Preliminary mechanistic studies</b> -----           | S6  |
| <b>E. Analytical data for the obtained products</b> ----- | S9  |
| <b>F. NMR spectra</b> -----                               | S57 |



## A. General Information

$^1\text{H}$  and  $^{13}\text{C}$  NMR spectra were recorded on BRUKER DRX-400 spectrometer using  $\text{CDCl}_3$  as solvent and TMS as an internal standard. Chemical shifts for  $^1\text{H}$  NMR spectra are reported as  $\delta$  in units of parts per million (ppm) downfield from  $\text{SiMe}_4$  ( $\delta$  0.0) and relative to the signal of chloroform-d ( $\delta$  7.26, singlet). Multiplicities were given as: s (singlet); d (doublet); t (triplet); q (quartet); dd (doublets of doublet); dt (doublets of triplet); dq (doublets of quartet). Coupling constants are reported as a  $J$  value in Hz. Carbon nuclear magnetic resonance spectra ( $^{13}\text{C}$  NMR) are reported as  $\delta$  in units of parts per million (ppm) downfield from  $\text{SiMe}_4$  ( $\delta$  0.0) and relative to the signal of chloroform-d ( $\delta$  77.0, triplet). Gas chromatograph mass spectra were obtained with a SHIMADZU model GCMS-QP 5000 spectrometer. HRMS was carried out on a MAT 95XP (Thermo).

## B. General procedure:

### 1) General procedure for multiple dehydrogenative Heck cascade enabled with phenol acrylates

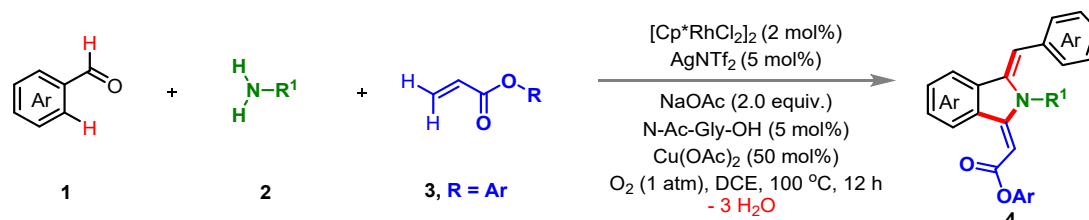

**Figure S1.** Phenol acrylates enabled oxidative Heck cascade.

**Procedure:** An oven-dried 10 mL Schlenk Tube was charged with benzaldehyde **1** (0.20 mmol), aniline **2** (0.20 mmol),  $[\text{RhCp}^*\text{Cl}_2]_2$  (0.002 mmol),  $\text{AgNTf}_2$  (0.005 mmol) and  $\text{Cu}(\text{OAc})_2$  (0.05 mmol),  $\text{NaOAc}$  (0.20 mmol),  $\text{N-Ac-Gly-OH}$  (0.005 mmol) in sequence, followed by adding phenol acrylates **3** (0.10 mmol) in DCE (1.0 mL) with  $\text{O}_2$  (1 atm) through syringe. The resulting reaction mixture was stirred at 100 °C for 12 h and then diluted with  $\text{CH}_2\text{Cl}_2$  and filtered through diatomite. Removing the solvent in vacuo and purification of the residue by silica gel column chromatography afforded the desired isoindole products **4**.

### 2) General procedure for multiple dehydrogenative Heck cascade enabled with alkyl acrylates

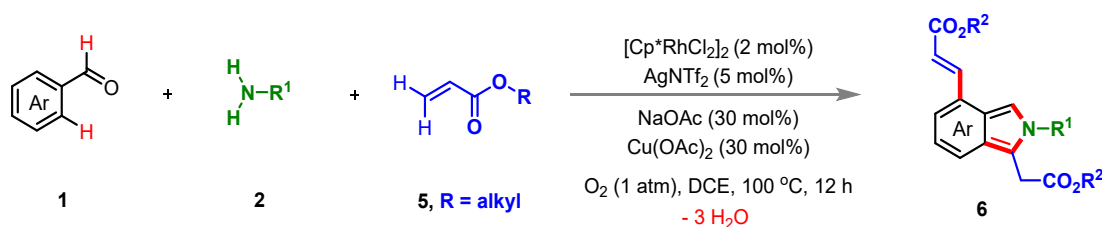

**Figure S2.** Alkyl acrylates enabled oxidative Heck cascade.

**Procedure:** An oven-dried 10 mL Schlenk Tube was charged with benzaldehyde **1** (0.10 mmol), aniline **2** (0.10 mmol), [RhCp\*Cl<sub>2</sub>]<sub>2</sub> (0.002 mmol), AgNTf<sub>2</sub> (0.005 mmol) and Cu(OAc)<sub>2</sub> (0.03 mmol), NaOAc (0.03 mmol) in sequence, followed by adding alkyl acrylates **5** (0.20 mmol) in DCE (1.0 mL) with O<sub>2</sub> (1 atm) through syringe. The resulting reaction mixture was stirred at 100 °C for 12 h and then diluted with CH<sub>2</sub>Cl<sub>2</sub> and filtered through diatomite. Removing the solvent in vacuo and purification of the residue by alkaline aluminum oxide column chromatography afforded the desired isoindole products **6**.

### 3) General procedure for multiple dehydrogenative Heck cascade enabled with allyl alcohols or acrylamides

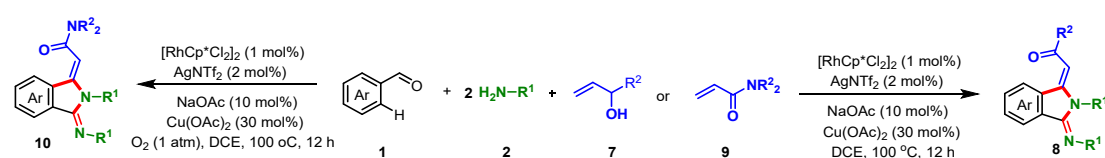

**Figure S3.** Allyl alcohols or acrylamides enabled oxidative Heck cascade.

**Procedure:** An oven-dried 10 mL Schlenk Tube was charged with benzaldehyde **1** (0.10 mmol), aniline **2** (0.20 mmol), [RhCp\*Cl<sub>2</sub>]<sub>2</sub> (0.001 mmol), AgNTf<sub>2</sub> (0.002 mmol) and Cu(OAc)<sub>2</sub> (0.03 mmol), NaOAc (0.01 mmol) in sequence, followed by adding allyl alcohols **7** (0.10 mmol) with O<sub>2</sub> (1 atm) or acrylamides **9** with air (0.10 mmol) in DCE (1.0 mL) through syringe. The resulting reaction mixture was stirred at 100 °C for 12 h and then diluted with CH<sub>2</sub>Cl<sub>2</sub> and filtered through diatomite. Removing the solvent in vacuo and purification of the residue by silica gel column chromatography afforded the desired isoindole products **8** or **10**.

## C. Synthetic applications:

### 1) Further transformations via Diels-Alder reaction

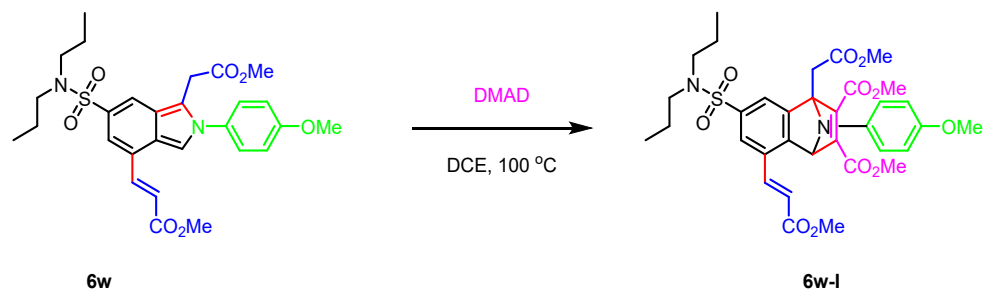

**Figure S4.** Further transformations via Diels-Alder reaction.

**Procedure:** An oven-dried 10 mL Schlenk Tube was charged with isoindole **6w** (0.05 mmol) in sequence, followed by adding DMAD (0.10 mmol) in DCE (1.0 mL) through syringe. The resulting reaction mixture was stirred at 100 °C for 8 h. Then removing the solvent in vacuo and purification of the residue by silica gel column chromatography afforded the desired product.

### 2) Further transformations via oxidation

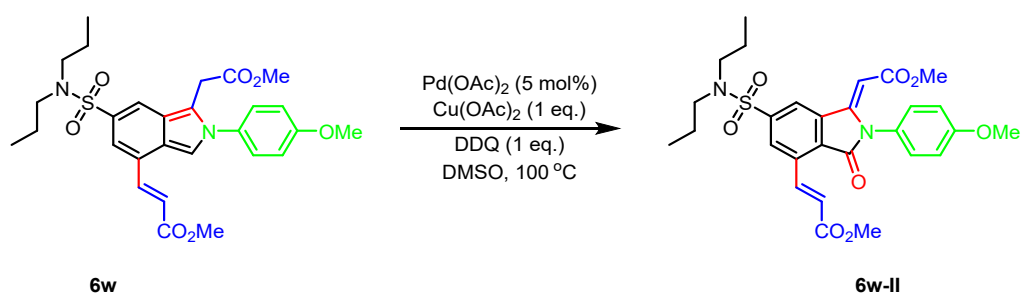

**Figure S5.** Further transformations via oxidation.

**Procedure:** An oven-dried 10 mL Schlenk Tube was charged with isoindole **6w** (0.05 mmol), Pd(OAc)<sub>2</sub> (0.0025 mmol), Cu(OAc)<sub>2</sub> (0.05 mmol), DDQ (0.05 mmol) in sequence with DMSO (1.0 mL). The resulting reaction mixture was stirred at 100 °C

for 10 h and then diluted with CH<sub>2</sub>Cl<sub>2</sub> and filtered through diatomite. Removing the solvent in vacuo and purification of the residue by silica gel column chromatography afforded the desired product.

## D. Preliminary mechanistic studies

### 1) Experimental verification

In order to explore the role of the imine formed in situ by aldehyde and aniline in this reaction, we used the pre-synthesized imine **1a-I** and found that the imine could well assist this oxidative Heck cascade, leading to the desired isoindole product **4a** in good yield. This observation indicated that this multicomponent oxidative Heck cascade might initiate with the in situ formation of imines, which assisted the oxidative Heck reaction, and then, followed by further transformations.

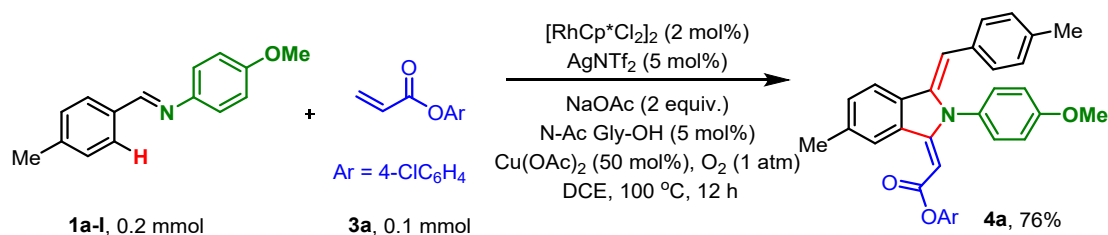

**Figure S6.** Imine assisted oxidative Heck cascade.

When we used the pre-synthesized imine **1b-1**, another aldehyde **2b** and phenol acrylate **3b** for this multicomponent involved C–H activation cascade, we could obtain different substituted isoindole product **4b** which afford rapid construction of molecular complexity. This observation further supports the above mentioned that the in situ generated imines as the key intermediates to initiate this oxidative Heck cascade.

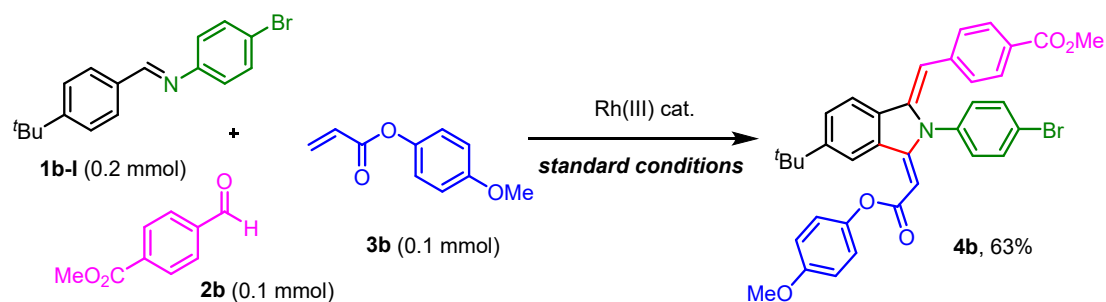

**Figure S7.** Multicomponent C–H activation cascade.

In order to further verify whether the reaction intermediate contained enamine or ketimine, we only used imines **1b-I** and aldehydes **2b** under standard conditions. Unfortunately, we had not observed any other substances. We indicated that this reaction might proceed via the in situ generated imines assisted the oxidative Heck reaction, and subsequent condensation with another aldehyde led to the desired isoindole product **4**.

These observations further support our previous proposal that, for multicomponent oxidative Heck cascade with phenol acrylates, in situ formation of imines took place first, which assisted the subsequent oxidative Heck reaction, further Michael addition gave isoindole intermediate. Upon further condensation and dehydration led to the formation of isoindole products **4**.



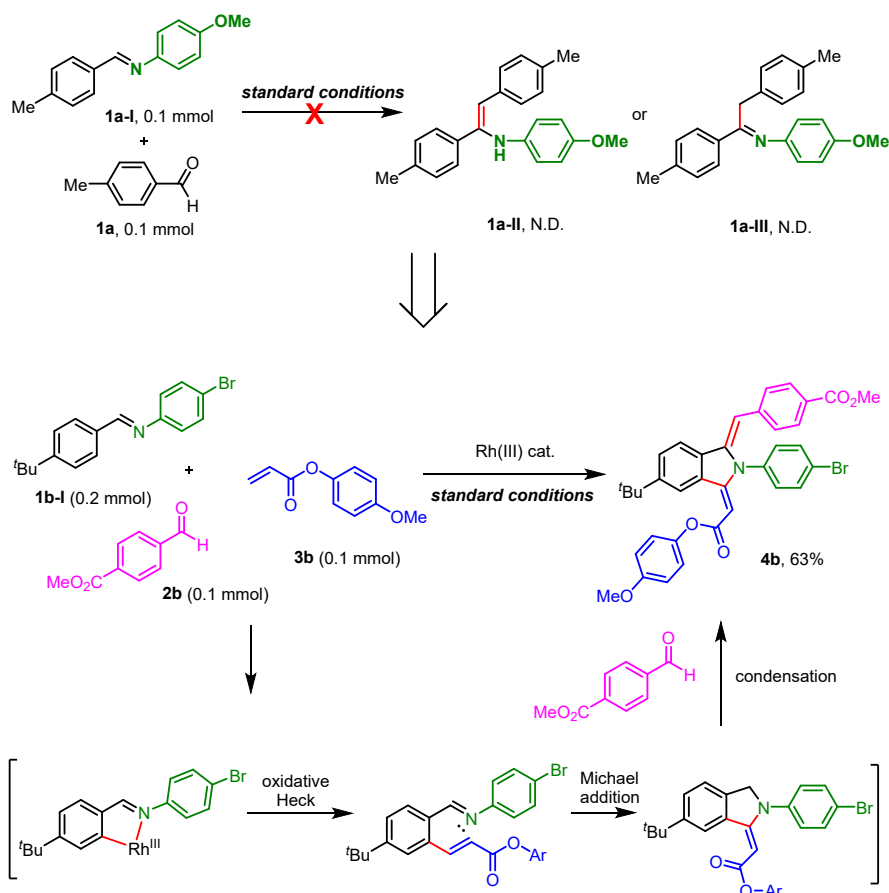

**Figure S8.** Verification of the formation of enamine or ketimine intermediates.

## 2) Proposed mechanism

For phenol acrylate substrates in this oxidative Heck cascade, Rh-catalyzed oxidative Heck reaction with in situ generated imines gave **C1**, in which isomerization of imines and subsequent Michael addition took place to give **D1**. Upon the treatment of base to the benzylamine moiety gave benzyl anion, which underwent nucleophilic addition to the aldehydes to afford intermediate **E1**, and the isoindole products **4** were obtained via further dehydration.

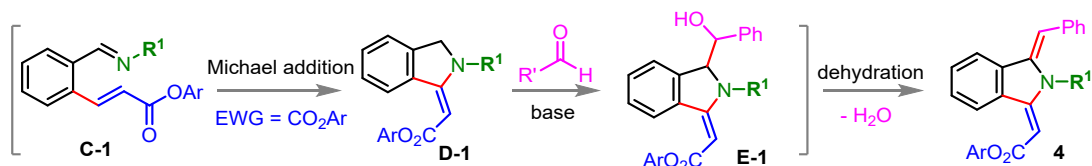

**Figure S9.** A possible reaction pathway for the generation of isoindole **4**.

When alkyl acrylate participated in the reaction, the more electron-withdrawing esters groups on the electron-bias olefins exhibited better reactivity for the oxidative Heck reaction and gave di-olefination products **C2**. Further aza-Heck reaction via olefin insertion to imines afforded intermediates **D2**, and the isoindole products **6** were obtained upon subsequent protonolysis and aromatization.

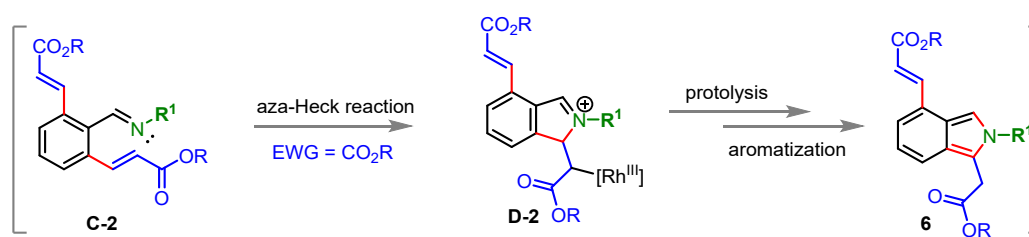

**Figure S10.** A possible reaction pathway for the generation of isoindoles **6**.

The use of acrylamides that features relatively strong directing ability while weak electron-withdrawing property, oxidative Heck intermediate **C-3** underwent reinsertion of the Rh-H species, facilitated by coordination of imine and amide functionality. Subsequently, coordination and further oxidation of anilines to the corresponding Rh-nitrene intermediate **E-3**, which underwent nitrene insertion to afford **F-3**. Further migratory insertion of amino-rhodium species **F-3** into imines gave **G-3**, upon  $\beta$ -H elimination and further oxidation, the isoindole products **10** was obtained.

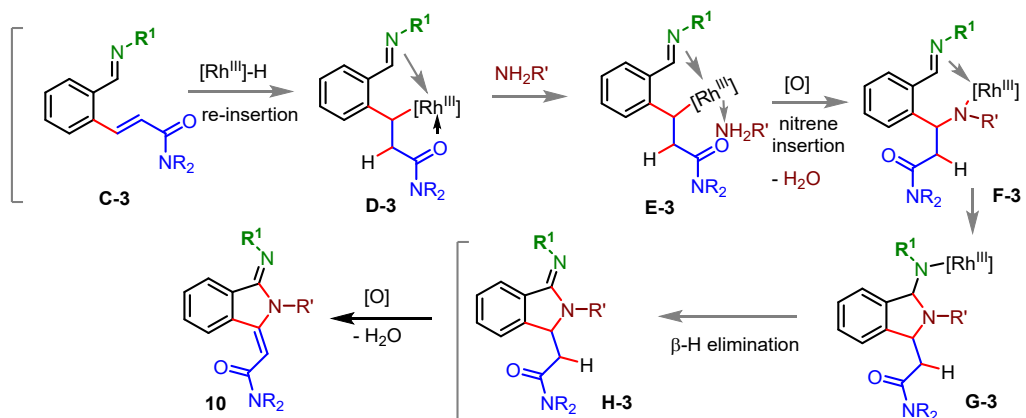

**Figure S11.** A possible reaction pathway for the generation of isoindoles **10**.

## E. Analytical data for the obtained products

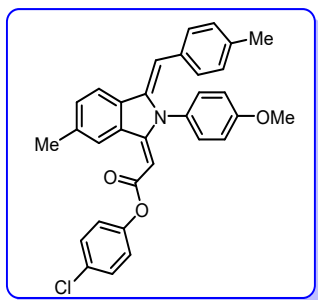

**4-Chlorophenyl** **2-((E)-2-(4-methoxyphenyl)-6-methyl-3-((Z)-4-methylbenzylidene)isoindolin-1-ylidene)acetate (4a)**,  $^1\text{H NMR}$  (400 MHz,  $\text{CDCl}_3$ )  $\delta$  9.21 (s, 1H), 7.53 (d,  $J = 8.0$  Hz, 1H), 7.33-7.29 (m, 5H), 7.27 (s, 1H), 7.25 (s, 1H), 7.16 (d,  $J = 8.0$  Hz, 2H), 7.11 (dd,  $J = 2.4$  Hz, 6.8 Hz, 2H), 7.05 (dd,  $J = 2.0$  Hz, 5.2 Hz, 2H), 5.78 (s, 1H), 5.00 (s, 1H), 3.90 (s, 3H).  $^{13}\text{C NMR}$  (100 MHz,  $\text{CDCl}_3$ )  $\delta$  166.0, 159.8, 157.1, 150.0, 141.8, 139.6, 137.0, 133.0, 132.7, 131.7, 131.4, 130.8, 130.3, 129.3, 129.1, 129.1, 128.3, 123.5, 122.2, 115.4, 108.7, 85.0, 55.5, 21.9, 21.3. HRMS (ESI-TOF)  $m/z$ :  $[\text{M} + \text{H}]^+$  Calcd for  $\text{C}_{32}\text{H}_{27}\text{ClNO}_3$ : 508.1679, Found: 508.1683.

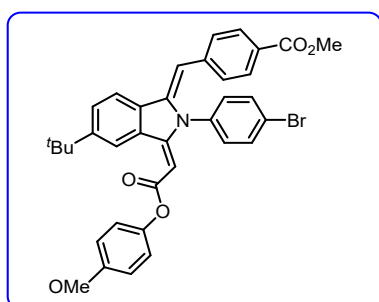

**Methyl 4-(((1Z,3E)-2-(4-bromophenyl)-5-(tert-butyl)-3-(2-(4-methoxyphenoxy)-2-oxoethylidene)isoindolin-1-ylidene)methyl)benzoate (4b)**,  $^1\text{H NMR}$  (400 MHz,  $\text{CDCl}_3$ )  $\delta$  9.48 (d,  $J = 1.6$  Hz, 1H), 8.02 (d,  $J = 8.4$  Hz, 2H), 7.76 (dd,  $J = 2.0$  Hz, 6.8 Hz, 2H), 7.54 (d,  $J = 8.4$  Hz, 1H), 7.45 (d,  $J = 8.0$  Hz, 2H), 7.39 (dd,  $J = 1.6$  Hz, 8.4 Hz, 1H), 7.28 (dd,  $J = 2.0$  Hz, 6.8 Hz, 2H), 7.03 (dd,  $J = 2.4$  Hz, 6.8 Hz, 2H), 6.90-6.87 (m, 3H), 5.70 (s, 1H), 5.04 (s, 1H), 3.94 (s, 3H), 3.80 (s, 3H), 1.34 (s, 9H).  $^{13}\text{C NMR}$  (100 MHz,  $\text{CDCl}_3$ )  $\delta$  166.8, 165.8, 156.7, 155.7, 153.8, 144.7, 142.8, 140.8, 135.7, 133.7, 131.7, 131.1, 129.7, 129.4, 128.5, 127.9, 125.3, 123.3, 122.7, 122.1, 114.3, 106.1, 87.9, 55.5, 52.1, 35.4, 31.4. HRMS (ESI-TOF)  $m/z$ :  $[\text{M} + \text{H}]^+$  Calcd for  $\text{C}_{36}\text{H}_{33}\text{BrNO}_5$ : 637.1464, Found: 637.1465.

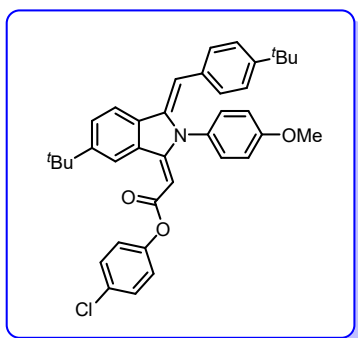

**4-Chlorophenyl**      **2-((E)-6-(tert-butyl)-3-((Z)-4-(tert-butyl)benzylidene)-2-(4-methoxyphenyl)isoindolin-1-ylidene)acetate (4c)**,  $^1\text{H NMR}$  (400 MHz,  $\text{CDCl}_3$ )  $\delta$  9.39 (d,  $J = 1.6$  Hz, 1H), 7.55 (d,  $J = 8.4$  Hz, 1H), 7.32 (dd,  $J = 2.0$  Hz, 8.4 Hz, 1H), 7.27 (d,  $J = 8.4$  Hz, 1H), 7.23-7.19 (m, 5H), 7.17 (s, 1H), 7.15 (s, 1H), 7.00 (dd,  $J = 2.0$  Hz, 6.8 Hz, 2H), 6.96 (dd,  $J = 2.0$  Hz, 6.8 Hz, 2H), 5.69 (s, 1H), 4.90 (s, 1H), 3.80 (s, 3H), 1.25 (d,  $J = 1.6$  Hz, 18H).  $^{13}\text{C NMR}$  (100 MHz,  $\text{CDCl}_3$ )  $\delta$  165.6, 159.8, 157.1, 153.0, 150.3, 150.1, 141.8, 132.9, 132.7, 131.6, 130.9, 130.0, 129.2, 129.1, 127.8, 125.3, 125.0, 123.9, 123.5, 122.0, 115.4, 108.7, 85.3, 55.5, 35.4, 34.6, 31.4, 31.3. HRMS (ESI-TOF)  $m/z$ :  $[\text{M} + \text{H}]^+$  Calcd for  $\text{C}_{38}\text{H}_{39}\text{ClNO}_3$ : 592.2540, Found: 592.2543.

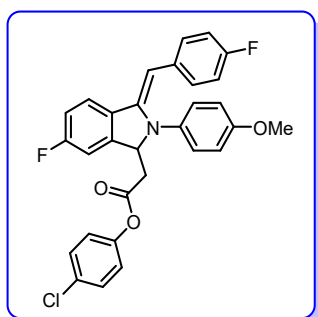

**4-Chlorophenyl**      **2-((E)-6-fluoro-3-((Z)-4-fluorobenzylidene)-2-(4-methoxyphenyl)isoindolin-1-ylidene)acetate (4d)**,  $^1\text{H NMR}$  (400 MHz,  $\text{CDCl}_3$ )  $\delta$  9.19 (dd,  $J = 1.6$  Hz, 10.4 Hz, 1H), 7.42 (dd,  $J = 5.2$  Hz, 8.8 Hz, 1H), 7.32-7.29 (m, 6H), 7.13 (d,  $J = 8.8$  Hz, 2H), 7.09-7.03 (m, 5H), 5.78 (s, 1H), 5.04 (s, 1H), 3.91 (s, 3H).  $^{13}\text{C NMR}$  (100 MHz,  $\text{CDCl}_3$ )  $\delta$  165.9, 163.2 (d,  $J = 246.0$  Hz), 162.1 (d,  $J = 246.0$  Hz), 160.0, 155.9, 149.8, 141.5, 134.7, 134.5, 131.1, 131.0, 130.7, 130.5, 129.3, 128.5, 123.8, 123.7, 123.4, 118.1, 117.9, 115.8, 115.6, 115.5, 115.4, 115.2, 107.4, 86.4, 55.6.

**<sup>19</sup>F NMR (60 MHz, CDCl<sub>3</sub>)**  $\delta$  -109.5, -114.0. HRMS (ESI-TOF)  $m/z$ : [M + H]<sup>+</sup> Calcd for C<sub>30</sub>H<sub>23</sub>ClF<sub>2</sub>NO<sub>3</sub>: 517.1256, Found: 517.1259.

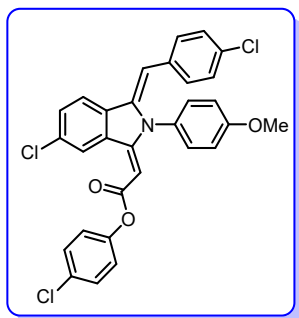

**4-Chlorophenyl**                      **2-((E)-6-chloro-3-((Z)-4-chlorobenzylidene)-2-(4-methoxyphenyl)isoindolin-1-ylidene)acetate (4e)**, **<sup>1</sup>H NMR (400 MHz, CDCl<sub>3</sub>)**  $\delta$  9.44 (d,  $J$  = 2.0 Hz, 1H), 7.43 (d,  $J$  = 8.8 Hz, 1H), 7.33-7.28 (m, 6H), 7.27 (s, 2H), 7.24 (d,  $J$  = 2.4 Hz, 1H), 7.11 (dd,  $J$  = 2.0 Hz, 6.8 Hz, 2H), 7.03 (dd,  $J$  = 2.4 Hz, 5.6 Hz, 2H), 5.77 (s, 1H), 5.04 (s, 1H), 3.89 (s, 3H). **<sup>13</sup>C NMR (100 MHz, CDCl<sub>3</sub>)**  $\delta$  165.8, 160.1, 155.5, 149.7, 141.7, 135.6, 134.2, 133.8, 133.2, 132.1, 130.7, 130.6, 129.3, 128.8, 128.4, 128.3, 127.2, 123.4, 123.3, 115.6, 107.8, 86.9, 55.6. HRMS (ESI-TOF)  $m/z$ : [M + H]<sup>+</sup> Calcd for C<sub>30</sub>H<sub>21</sub>Cl<sub>3</sub>NO<sub>3</sub>: 547.0509, Found: 547.0512.

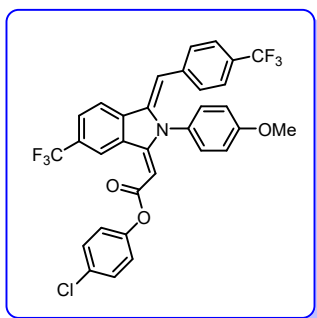

**4-Chlorophenyl**                      **2-((E)-2-(4-methoxyphenyl)-6-(trifluoromethyl)-3-((Z)-4-(trifluoromethyl)benzylidene)isoindolin-1-ylidene)acetate (4f)**, **<sup>1</sup>H NMR (400 MHz, CDCl<sub>3</sub>)**  $\delta$  9.76 (s, 1H), 7.64 (d,  $J$  = 8.0 Hz, 2H), 7.61 (s, 2H), 7.48 (d,  $J$  = 8.0 Hz, 2H), 7.34-7.30 (m, 4H), 7.15 (d,  $J$  = 8.8 Hz, 2H), 7.06 (dd,  $J$  = 2.0 Hz, 6.8 Hz, 2H), 5.91 (s, 1H), 5.14 (s, 1H), 3.92 (s, 3H). **<sup>13</sup>C NMR (100 MHz, CDCl<sub>3</sub>)**  $\delta$  165.5, 160.2, 155.2, 149.6, 142.1, 139.1, 138.9 (q,  $J$  = 38.0 Hz), 136.5, 133.2, 131.8 (q,  $J$  = 33.0 Hz), 130.7, 130.6, 129.9, 129.7, 129.3, 129.1, 128.1, 127.2 (q,  $J$  = 4.0 Hz), 125.9 (q,  $J$  = 4.0 Hz), 125.5 (q,  $J$  = 4.0 Hz), 124.8 (q,  $J$  = 270.0 Hz), 123.9 (q,  $J$  = 4.0 Hz), 123.4, 123.3,

122.7, 115.8, 114.5, 108.3, 88.2, 55.6.  $^{19}\text{F}$  NMR (60 MHz,  $\text{CDCl}_3$ )  $\delta$  -62.2, -62.5. HRMS (ESI-TOF)  $m/z$ :  $[\text{M} + \text{H}]^+$  Calcd for  $\text{C}_{32}\text{H}_{21}\text{ClF}_6\text{NO}_3$ : 615.1036, Found: 615.1037.

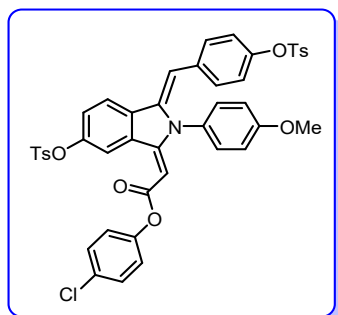

**4-Chlorophenyl** 2-((*E*)-2-(4-methoxyphenyl)-6-(tosyloxy)-3-((*Z*)-4-(tosyloxy)benzylidene)isoindolin-1-ylidene)acetate (**4g**),  $^1\text{H}$  NMR (400 MHz,  $\text{CDCl}_3$ )  $\delta$  8.99 (d,  $J = 2.0$  Hz, 1H), 7.74 (dd,  $J = 8.4$  Hz, 12.0 Hz, 4H), 7.36-7.31 (m, 5H), 7.26-7.22 (m, 6H), 7.12-7.09 (m, 3H), 7.01-6.97 (m, 4H), 5.74 (s, 1H), 4.98 (s, 1H), 3.89 (s, 3H), 2.46 (s, 3H), 2.36 (s, 3H).  $^{13}\text{C}$  NMR (100 MHz,  $\text{CDCl}_3$ )  $\delta$  165.2, 160.1, 155.2, 150.2, 149.8, 148.7, 145.6, 145.4, 141.6, 134.3, 134.1, 132.5, 132.3, 132.3, 130.6, 130.6, 130.4, 129.9, 129.8, 129.2, 128.5, 128.5, 128.3, 124.7, 123.3, 123.3, 122.6, 122.3, 115.6, 107.6, 87.2, 55.6, 21.7, 21.6. HRMS (ESI-TOF)  $m/z$ :  $[\text{M} + \text{H}]^+$  Calcd for  $\text{C}_{44}\text{H}_{35}\text{ClNO}_9\text{S}_2$ : 819.3164, Found: 819.3165.

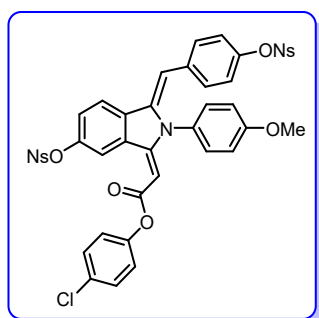

**4-Chlorophenyl** 2-((*E*)-2-(4-methoxyphenyl)-6-(((4-nitrophenyl)sulfonyl)oxy)-3-((*Z*)-4-(((4-nitrophenyl)sulfonyl)oxy)benzylidene)isoindolin-1-ylidene)acetate (**4h**),  $^1\text{H}$  NMR (400 MHz,  $\text{CDCl}_3$ )  $\delta$  8.82 (d,  $J = 2.4$  Hz, 1H), 8.39 (dd,  $J = 3.2$  Hz, 6.8 Hz, 2H), 8.27 (dd,  $J = 2.0$  Hz, 6.8 Hz, 2H), 8.09-8.04 (m, 5H), 7.45 (d,  $J = 8.8$  Hz, 1H), 7.35 (dd,  $J = 2.0$  Hz, 6.8 Hz, 2H), 7.30 (d,  $J = 8.0$  Hz, 2H), 7.23 (dd,  $J = 1.6$  Hz, 6.4 Hz, 2H), 7.00 (dd,  $J = 2.0$  Hz, 6.8 Hz, 2H), 7.02 (d,  $J = 8.4$  Hz, 2H), 6.89 (dd,  $J = 2.0$

Hz, 6.8 Hz, 2H), 5.78 (s, 1H), 4.97 (s, 1H), 3.89 (s, 3H).  $^{13}\text{C}$  NMR (100 MHz,  $\text{CDCl}_3$ )  $\delta$  165.4, 160.2, 154.8, 151.0, 149.7, 149.4, 148.2, 141.6, 141.0, 140.6, 135.0, 134.2, 132.7, 130.9, 130.6, 130.0, 129.9, 129.4, 128.0, 125.0, 124.5, 124.4, 123.6, 123.1, 122.4, 121.9, 120.9, 115.7, 114.5, 107.6, 87.7, 55.6. HRMS (ESI-TOF)  $m/z$ :  $[\text{M} + \text{H}]^+$  Calcd for  $\text{C}_{42}\text{H}_{29}\text{ClN}_3\text{O}_{13}\text{S}_2$ : 882.0830, Found: 882.0835.

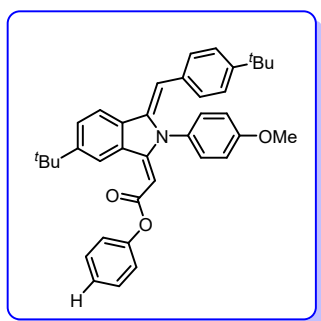

**Phenyl** 2-((*E*)-6-(*tert*-butyl)-3-((*Z*)-4-(*tert*-butyl)benzylidene)-2-(4-methoxyphenyl)isoindolin-1-ylidene)acetate (**4i**),  $^1\text{H}$  NMR (400 MHz,  $\text{CDCl}_3$ )  $\delta$  9.52 (d,  $J = 1.2$  Hz, 1H), 7.66 (d,  $J = 8.4$  Hz, 1H), 7.42 (dd,  $J = 1.6$  Hz, 8.4 Hz, 1H), 7.39-7.34 (m, 6H), 7.30 (d,  $J = 8.8$  Hz, 2H), 7.19 (d,  $J = 7.2$  Hz, 1H), 7.15-7.10 (m, 4H), 5.78 (s, 1H), 5.06 (s, 1H), 3.90 (s, 3H), 1.36 (s, 18H).  $^{13}\text{C}$  NMR (100 MHz,  $\text{CDCl}_3$ )  $\delta$  165.9, 159.7, 156.7, 153.0, 151.5, 150.2, 141.9, 132.9, 132.8, 131.6, 130.9, 130.1, 129.1, 129.1, 128.6, 127.7, 125.3, 125.1, 124.8, 122.1, 115.4, 108.2, 85.9, 55.5, 35.4, 34.6, 31.4, 31.3. HRMS (ESI-TOF)  $m/z$ :  $[\text{M} + \text{H}]^+$  Calcd for  $\text{C}_{38}\text{H}_{41}\text{NO}_3$ : 558.3008, Found: 558.3013.

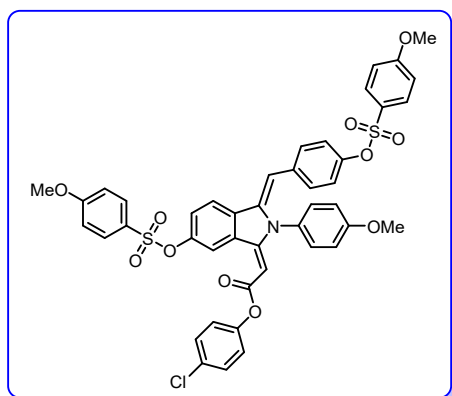

**4-Chlorophenyl** 2-((*E*)-2-(4-methoxyphenyl)-6-(((4-methoxyphenyl)sulfonyl)oxy)-3-((*Z*)-4-(((4-methoxyphenyl)sulfonyl)oxy)benzylidene)isoindolin-1-



ylidene)acetate (**4j**),  $^1\text{H NMR}$  (400 MHz,  $\text{CDCl}_3$ )  $\delta$  8.95 (d,  $J = 2.0$  Hz, 1H), 7.78 (dd,  $J = 6.0$  Hz, 11.2 Hz, 4H), 7.35-7.32 (m, 4H), 7.25 (s, 1H), 7.23 (s, 2H), 7.10 (d,  $J = 8.8$  Hz, 2H), 7.00-6.97 (m, 7H), 6.92 (dd,  $J = 2.0$  Hz, 8.8 Hz, 2H), 5.75 (s, 1H), 4.98 (s, 1H), 3.89 (d,  $J = 1.2$  Hz, 6H), 3.79 (s, 3H).  $^{13}\text{C NMR}$  (100 MHz,  $\text{CDCl}_3$ )  $\delta$  165.2, 164.2, 164.2, 160.1, 155.3, 150.2, 149.7, 148.8, 141.6, 134.3, 134.1, 132.3, 130.8, 130.7, 130.6, 130.6, 130.3, 129.2, 128.3, 126.7, 124.9, 123.3, 122.7, 122.2, 115.6, 114.5, 114.3, 107.7, 87.1, 55.8, 55.6, 55.6. HRMS (ESI-TOF)  $m/z$ :  $[\text{M} + \text{H}]^+$  Calcd for  $\text{C}_{44}\text{H}_{35}\text{ClNO}_{11}\text{S}_2$ : 852.1340, Found: 852.1344.

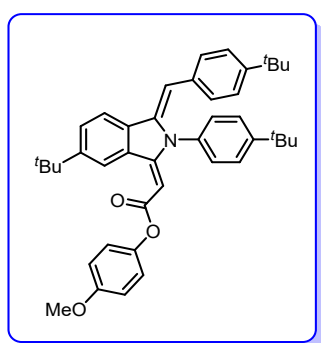

**4-Methoxyphenyl 2-((E)-6-(tert-butyl)-3-((Z)-4-(tert-butyl)benzylidene)-2-(4-(tert-butyl)phenyl)isoindolin-1-ylidene)acetate (**4k**),  $^1\text{H NMR}$  (400 MHz,  $\text{CDCl}_3$ )  $\delta$  9.53 (d,  $J = 1.6$  Hz, 1H), 7.64 (d,  $J = 8.4$  Hz, 1H), 7.61 (dd,  $J = 1.6$  Hz, 6.4 Hz, 2H), 7.42 (dd,  $J = 1.6$  Hz, 8.4 Hz, 1H), 7.38 (d,  $J = 8.4$  Hz, 2H), 7.33 (d,  $J = 8.4$  Hz, 2H), 7.30 (dd,  $J = 1.6$  Hz, 6.4 Hz, 2H), 7.06 (dd,  $J = 2.4$  Hz, 6.8 Hz, 2H), 6.89 (dd,  $J = 2.4$  Hz, 6.8 Hz, 2H), 5.77 (s, 1H), 5.09 (s, 1H), 3.80 (s, 3H), 1.42 (s, 9H), 1.36 (d,  $J = 1.6$  Hz, 18H).  $^{13}\text{C NMR}$  (100 MHz,  $\text{CDCl}_3$ )  $\delta$  166.3, 156.6, 156.4, 152.9, 151.9, 150.1, 145.0, 141.8, 134.1, 133.0, 132.9, 131.7, 129.3, 129.1, 128.7, 128.4, 127.6, 127.1, 125.3, 125.1, 124.0, 122.9, 122.8, 122.0, 114.3, 108.1, 85.9, 55.5, 35.4, 34.8, 34.6, 31.5, 31.4, 31.3. HRMS (ESI-TOF)  $m/z$ :  $[\text{M} + \text{H}]^+$  Calcd for  $\text{C}_{42}\text{H}_{47}\text{NO}_3$ : 613.3556, Found: 613.3559.**

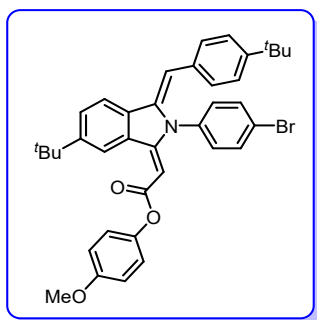

**4-Methoxyphenyl**                      **2-((E)-2-(4-bromophenyl)-6-(tert-butyl)-3-((Z)-4-(tert-butyl)benzylidene)isoindolin-1-ylidene)acetate (4l)**,  $^1\text{H NMR}$  (400 MHz,  $\text{CDCl}_3$ )  $\delta$  9.51 (d,  $J = 1.6$  Hz, 1H), 7.74 (d,  $J = 8.4$  Hz, 2H), 7.64 (d,  $J = 8.4$  Hz, 1H), 7.43 (dd,  $J = 1.6$  Hz, 8.4 Hz, 1H), 7.38 (d,  $J = 8.4$  Hz, 2H), 7.31 (d,  $J = 8.4$  Hz, 2H), 7.28 (dd,  $J = 1.6$  Hz, 6.8 Hz, 2H), 5.74 (s, 1H), 5.01 (s, 1H), 3.80 (s, 3H), 1.36 (d,  $J = 1.6$  Hz, 18H).  $^{13}\text{C NMR}$  (100 MHz,  $\text{CDCl}_3$ )  $\delta$  166.0, 156.7, 156.0, 153.2, 150.4, 144.9, 141.5, 136.0, 133.6, 132.8, 132.5, 132.0, 131.8, 131.5, 130.8, 129.1, 128.4, 127.9, 125.4, 125.1, 124.2, 123.0, 122.8, 122.7, 122.1, 114.3, 108.0, 86.5, 55.5, 35.4, 34.6, 31.4, 31.3. HRMS (ESI-TOF)  $m/z$ :  $[\text{M} + \text{H}]^+$  Calcd for  $\text{C}_{38}\text{H}_{39}\text{BrNO}_3$ : 635.2035, Found: 635.2039.

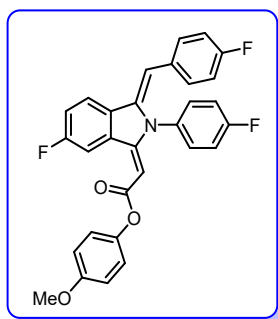

**4-Methoxyphenyl**                      **2-((E)-6-fluoro-3-((Z)-4-fluorobenzylidene)-2-(4-fluorophenyl)isoindolin-1-ylidene)acetate (4m)**,  $^1\text{H NMR}$  (400 MHz,  $\text{CDCl}_3$ )  $\delta$  9.23 (dd,  $J = 2.8$  Hz, 10.4 Hz, 1H), 7.42-7.38 (m, 3H), 7.35-7.29 (m, 4H), 7.09-7.05 (m, 3H), 7.01 (dd,  $J = 2.4$  Hz, 6.8 Hz, 2H), 6.89 (dd,  $J = 2.0$  Hz, 6.8 Hz, 2H), 5.72 (s, 1H), 5.04 (s, 1H), 3.80 (s, 3H).  $^{13}\text{C NMR}$  (100 MHz,  $\text{CDCl}_3$ )  $\delta$  166.5, 163.2 (d,  $J = 246.0$  Hz), 162.7 (d,  $J = 248$  Hz), 162.1 (d,  $J = 246.0$  Hz), 156.9, 155.2, 144.6, 141.4, 134.6, 134.5, 132.3, 132.2, 131.7, 131.6, 131.2, 131.2, 131.1, 131.0, 129.9, 129.9, 123.8, 123.7, 122.7, 118.1, 117.9, 117.7, 117.4, 115.8, 115.6, 115.3, 114.4, 106.8, 87.4, 55.5. HRMS (ESI-TOF)  $m/z$ :  $[\text{M} + \text{H}]^+$  Calcd for  $\text{C}_{30}\text{H}_{21}\text{F}_3\text{NO}_3$ : 500.1474, Found: 500.1480.

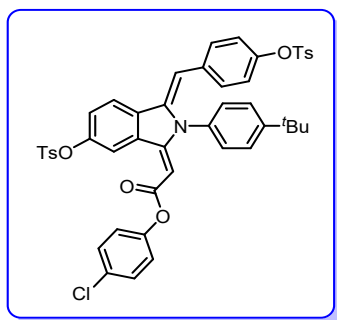

**4-Chlorophenyl**                      **2-((E)-2-(4-(tert-butyl)phenyl)-6-(tosyloxy)-3-((Z)-4-(tosyloxy)benzylidene)isoindolin-1-ylidene)acetate (4n)**,  $^1\text{H NMR}$  (400 MHz,  $\text{CDCl}_3$ )  $\delta$  9.01 (d,  $J = 2.0$  Hz, 1H), 7.76 (d,  $J = 8.4$  Hz, 2H), 7.73 (d,  $J = 8.4$  Hz, 2H), 7.34-7.31 (m, 6H), 7.26-7.23 (m, 5H), 7.12 (dd,  $J = 2.4$  Hz, 8.8 Hz, 1H), 7.02-6.97 (m, 4H), 5.75 (s, 1H), 5.01 (s, 1H), 2.46 (s, 3H), 2.35 (s, 3H), 1.40 (s, 9H).  $^{13}\text{C NMR}$  (100 MHz,  $\text{CDCl}_3$ )  $\delta$  165.3, 155.1, 152.6, 150.2, 149.7, 148.7, 145.6, 145.4, 141.5, 134.4, 134.2, 133.2, 132.5, 132.4, 132.2, 130.6, 130.4, 129.9, 129.8, 129.2, 128.9, 128.5, 128.5, 127.4, 124.7, 123.4, 123.3, 122.6, 122.3, 107.7, 87.1, 34.9, 31.3, 21.7, 21.6. HRMS (ESI-TOF)  $m/z$ :  $[\text{M} + \text{H}]^+$  Calcd for  $\text{C}_{47}\text{H}_{41}\text{ClNO}_8\text{S}_2$ :846.1962, Found: 846.1963.

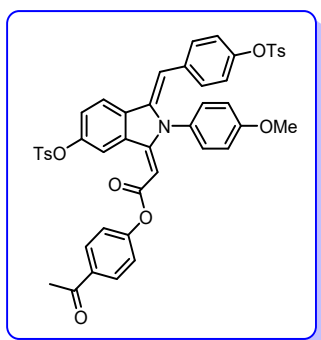

**4-Acetylphenyl**                      **2-((E)-2-(4-methoxyphenyl)-6-(tosyloxy)-3-((Z)-4-(tosyloxy)benzylidene)isoindolin-1-ylidene)acetate (4o)**,  $^1\text{H NMR}$  (400 MHz,  $\text{CDCl}_3$ )  $\delta$  9.00 (d,  $J = 2.0$  Hz, 1H), 7.99 (d,  $J = 8.8$  Hz, 2H), 7.73 (dd,  $J = 8.4$  Hz, 9.6 Hz, 4H), 7.36-7.32 (m, 4H), 7.27-7.24 (m, 6H), 7.16 (d,  $J = 8.8$  Hz, 2H), 7.11 (d,  $J = 8.8$  Hz, 2H), 6.98 (d,  $J = 8.4$  Hz, 2H), 5.77 (s, 1H), 5.00 (s, 1H), 3.89 (s, 3H), 2.60 (s, 3H), 2.46 (s, 3H), 2.34 (s, 3H).  $^{13}\text{C NMR}$  (100 MHz,  $\text{CDCl}_3$ )  $\delta$  197.0, 164.8, 160.1, 155.5, 155.2, 150.1, 148.7, 145.6, 145.4, 141.5, 134.2, 134.1, 134.0, 132.3, 132.3,

132.2, 130.6, 129.9, 129.8, 129.7, 128.5, 128.4, 128.2, 124.7, 123.3, 122.6, 122.3, 122.0, 115.6, 107.9, 87.0, 55.6, 26.5, 21.7, 21.6. HRMS (ESI-TOF)  $m/z$ :  $[M + H]^+$   
Calcd for  $C_{46}H_{38}NO_{10}S_2$ : 828.1937, Found: 828.1939.

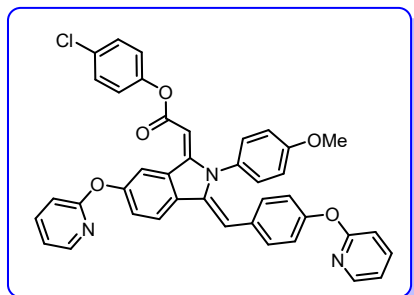

**4-Chlorophenyl**                      **2-((E)-2-(4-methoxyphenyl)-6-(pyridin-2-yloxy)-3-((Z)-4-(pyridin-2-yloxy)benzylidene)isoindolin-1-ylidene)acetate (4p),  $^1H$  NMR (400 MHz,  $CDCl_3$ )  $\delta$  9.23 (d,  $J = 2.4$  Hz, 1H), 8.20 (dd,  $J = 1.2$  Hz, 4.8 Hz, 1H), 8.11 (dd,  $J = 1.6$  Hz, 5.2 Hz, 1H), 7.73 (d,  $J = 8.8$  Hz, 1H), 7.70-7.34 (m, 2H), 7.41 (d,  $J = 8.4$  Hz, 2H), 7.31-7.27 (m, 4H), 7.16 (dd,  $J = 2.0$  Hz, 8.4 Hz, 1H), 7.12 (d,  $J = 8.8$  Hz, 3H), 7.03-6.98 (m, 4H), 6.95-6.93 (m, 2H), 6.91 (d,  $J = 8.4$  Hz, 1H), 5.82 (s, 1H), 5.02 (s, 1H), 3.91 (s, 3H).  $^{13}C$  NMR (100 MHz,  $CDCl_3$ )  $\delta$  165.8, 163.7, 163.4, 159.9, 156.9, 156.4, 154.6, 153.5, 149.8, 147.7, 147.4, 141.6, 139.5, 139.4, 134.4, 131.8, 130.8, 130.8, 130.3, 129.2, 128.8, 124.5, 123.5, 123.5, 121.5, 121.0, 118.7, 118.4, 115.5, 111.8, 111.6, 108.2, 85.9, 55.6. HRMS (ESI-TOF)  $m/z$ :  $[M + H]^+$  Calcd for  $C_{40}H_{29}ClN_3O_5$ : 666.1796, Found: 666.1799.**

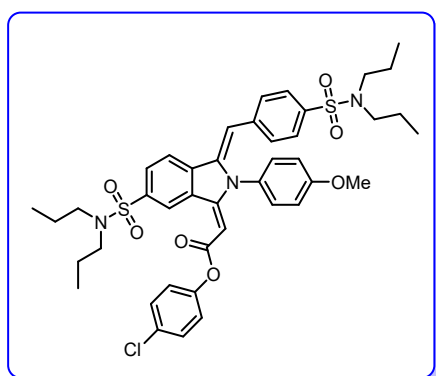

**4-Chlorophenyl**                      **2-((E)-6-(N,N-dipropylsulfamoyl)-3-((Z)-4-(N,N-dipropylsulfamoyl)benzylidene)-2-(4-methoxyphenyl)isoindolin-1-ylidene)acetate**

**(4q), <sup>1</sup>H NMR (400 MHz, CDCl<sub>3</sub>) δ** 9.83 (d, *J* = 1.2 Hz, 1H), 7.81-7.77 (m, 3H), 7.60 (d, *J* = 8.4 Hz, 1H), 7.48 (d, *J* = 8.0 Hz, 2H), 7.31-7.28 (m, 4H), 7.14 (d, *J* = 8.8 Hz, 2H), 7.05 (dd, *J* = 2.0 Hz, 6.4 Hz, 2H), 5.89 (s, 1H), 5.12 (s, 1H), 3.91 (s, 3H), 3.13 (t, *J* = 7.6 Hz, 8H), 1.59-1.53 (m, 8H), 0.88 (t, *J* = 7.2 Hz, 6H), 0.82 (t, *J* = 7.6 Hz, 6H). **<sup>13</sup>C NMR (100 MHz, CDCl<sub>3</sub>) δ** 164.9, 160.2, 154.7, 149.7, 142.2, 141.9, 139.5, 139.2, 136.4, 133.4, 130.6, 130.3, 129.9, 129.2, 129.1, 128.7, 128.0, 127.3, 127.0, 125.8, 123.2, 123.2, 122.6, 115.8, 114.7, 108.1, 88.6, 55.6, 50.3, 49.7, 22.1, 21.8, 11.2, 11.1. HRMS (ESI-TOF) *m/z*: [M + H]<sup>+</sup> Calcd for C<sub>42</sub>H<sub>49</sub>ClN<sub>3</sub>O<sub>7</sub>S<sub>2</sub>: 806.2700, Found: 806.2705.

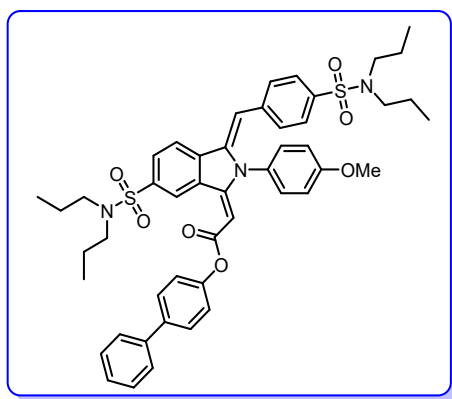

**[1,1'-Biphenyl]-4-yl 2-((*E*)-6-(*N,N*-dipropylsulfamoyl)-3-((*Z*)-4-(*N,N*-dipropylsulfamoyl)benzylidene)-2-(4-methoxyphenyl)isoindolin-1-ylidene)acetate** (**4r**), **<sup>1</sup>H NMR (400 MHz, CDCl<sub>3</sub>) δ** 9.88 (s, 1H), 7.82-7.78 (m, 3H), 7.62 (d, *J* = 8.4 Hz, 1H), 7.58-7.55 (m, 4H), 7.49 (d, *J* = 8.4 Hz, 2H), 7.43 (t, *J* = 8.0 Hz, 3H), 7.32 (d, *J* = 8.8 Hz, 2H), 7.19 (d, *J* = 8.4 Hz, 2H), 7.15 (d, *J* = 8.8 Hz, 2H), 5.89 (s, 1H), 5.19 (s, 1H), 3.92 (s, 3H), 3.16-3.12 (m, 8H), 1.59-1.55 (m, 8H), 0.89 (t, *J* = 7.2 Hz, 6H), 0.84 (t, *J* = 7.2 Hz, 6H). **<sup>13</sup>C NMR (100 MHz, CDCl<sub>3</sub>) δ** 165.3, 160.2, 154.4, 150.6, 142.3, 141.9, 140.6, 139.7, 139.2, 138.2, 136.4, 133.5, 130.7, 129.9, 128.7, 128.2, 127.8, 127.4, 127.1, 127.0, 122.6, 122.1, 116.4, 115.8, 114.8, 107.8, 89.2, 55.6, 50.3, 49.8, 22.1, 21.9, 11.2, 11.1. HRMS (ESI-TOF) *m/z*: [M + H]<sup>+</sup> Calcd for C<sub>48</sub>H<sub>53</sub>N<sub>3</sub>O<sub>7</sub>S<sub>2</sub>: 847.3327, Found: 847.3329.

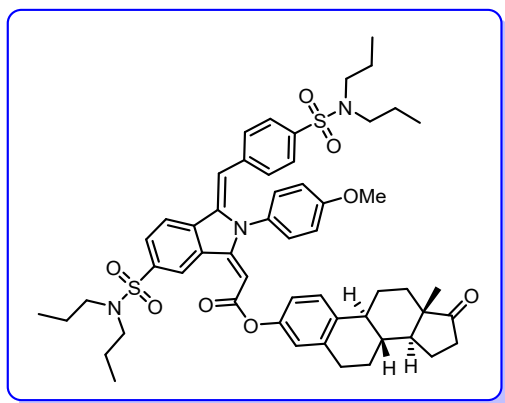

**(8*R*,9*S*,13*S*,14*S*)-13-Methyl-17-oxo-7,8,9,11,12,13,14,15,16,17-decahydro-6H-cyclopenta[a]phenanthren-3-yl 2-((*E*)-6-(*N,N*-dipropylsulfamoyl)-3-((*Z*)-4-(*N,N*-dipropylsulfamoyl)benzylidene)-2-(4-methoxyphenyl)isoindolin-1-ylidene)acetate (**4s**), <sup>1</sup>H NMR (400 MHz, CDCl<sub>3</sub>) δ 9.83 (d, *J* = 1.2 Hz, 1H), 7.79 (d, *J* = 8.4 Hz, 2H), 7.76 (dd, *J* = 1.6 Hz, 8.4 Hz, 1H), 7.60 (d, *J* = 8.4 Hz, 1H), 7.48 (d, *J* = 8.4 Hz, 2H), 7.30 (d, *J* = 8.8 Hz, 2H), 7.13 (d, *J* = 8.8 Hz, 2H), 6.89-6.81 (m, 3H), 5.86 (s, 1H), 5.15 (s, 1H), 3.91 (s, 3H), 3.14-3.10 (m, 8H), 2.89 (t, *J* = 4.0 Hz, 2H), 2.53-2.46 (m, 1H), 2.41-2.38 (m, 1H), 2.32-2.26 (m, 1H), 2.12 (q, *J* = 9.2 Hz, 2H), 1.99-1.94 (m, 4H), 1.55 (t, *J* = 7.6 Hz, 8H), 1.47-1.42 (m, 2H), 0.89 (t, *J* = 6.4 Hz, 12H), 0.83 (s, 3H). <sup>13</sup>C NMR (100 MHz, CDCl<sub>3</sub>) δ 190.9, 165.4, 160.2, 154.1, 148.9, 142.2, 141.7, 139.7, 139.1, 137.6, 136.6, 136.4, 133.5, 130.6, 129.8, 128.6, 128.2, 127.6, 127.3, 127.1, 126.0, 122.6, 121.9, 119.1, 115.8, 107.6, 89.5, 55.6, 50.4, 50.2, 49.7, 47.9, 44.1, 38.0, 35.8, 31.5, 29.4, 26.3, 25.7, 22.0, 21.8, 21.5, 13.8, 11.2, 11.1. HRMS (ESI-TOF) *m/z*: [M + H]<sup>+</sup> Calcd for C<sub>54</sub>H<sub>65</sub>N<sub>3</sub>O<sub>8</sub>S<sub>2</sub>:947.4213, Found: 947.4216.**

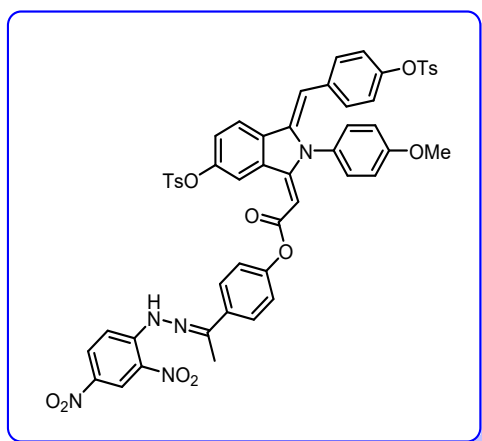

**4-(1-(2-(2,4-Dinitrophenyl)hydrazineylidene)ethyl)phenyl 2-((E)-2-(4-methoxyphenyl)-6-(tosyloxy)-3-((Z)-4-(tosyloxy)benzylidene)isoindolin-1-ylidene)acetate (4t), <sup>1</sup>H NMR (400 MHz, CDCl<sub>3</sub>) δ** 11.36 (s, 1H), 9.17 (s, 1H), 9.09 (s, 1H), 8.36 (d, *J* = 9.6 Hz, 1H), 8.12 (d, *J* = 9.6 Hz, 1H), 7.88 (d, *J* = 8.8 Hz, 2H), 7.74 (dd, *J* = 8.0 Hz, 12.0 Hz, 4H), 7.36-7.32 (m, 3H), 7.28-7.24 (m, 6H), 7.17 (d, *J* = 8.4 Hz, 2H), 7.12 (d, *J* = 8.4 Hz, 2H), 7.05 (d, *J* = 8.4 Hz, 1H), 6.98 (d, *J* = 8.0 Hz, 2H), 5.77 (s, 1H), 5.04 (s, 1H), 3.91 (s, 3H), 2.49 (s, 6H), 2.37 (s, 3H). <sup>13</sup>C NMR (100 MHz, CDCl<sub>3</sub>) δ 165.2, 160.1, 155.4, 152.9, 151.7, 150.2, 148.7, 145.6, 145.4, 145.0, 141.6, 138.2, 134.3, 134.2, 132.5, 132.3, 132.3, 130.6, 130.6, 130.1, 129.9, 129.8, 129.7, 128.5, 128.5, 128.3, 127.5, 124.5, 123.5, 123.3, 122.7, 122.4, 122.2, 116.7, 115.7, 107.8, 100.0, 87.2, 55.6, 21.7, 21.7, 13.7. HRMS (ESI-TOF) *m/z*: [M + H]<sup>+</sup> Calcd for C<sub>52</sub>H<sub>42</sub>N<sub>5</sub>O<sub>13</sub>S<sub>2</sub>: 1008.2221, Found: 1008.2224.

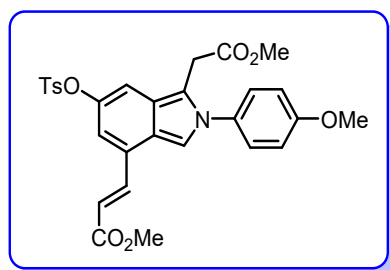

**Methyl (E)-3-(1-(2-methoxy-2-oxoethyl)-2-(4-methoxyphenyl)-6-(tosyloxy)-2H-isoindol-4-yl)acrylate (6a), <sup>1</sup>H NMR (400 MHz, CDCl<sub>3</sub>) δ** 7.76 (s, 1H), 7.72 (d, *J* = 15.2 Hz, 2H), 7.43 (d, *J* = 0.8 Hz, 1H), 7.33-7.32 (m, 2H), 7.31 (d, *J* = 2.4 Hz, 2H), 7.28 (d, *J* = 1.2 Hz, 1H), 7.00 (dd, *J* = 2.0 Hz, 6.4 Hz, 2H), 6.70 (d, *J* = 2.0 Hz, 1H), 6.38 (d, *J* = 16.0 Hz, 1H), 3.88 (s, 3H), 3.80 (s, 2H), 3.79 (s, 3H), 3.62 (s, 3H), 2.46 (s,

3H).  $^{13}\text{C}$  NMR (100 MHz,  $\text{CDCl}_3$ )  $\delta$  170.2, 167.5, 159.9, 145.3, 143.8, 142.9, 132.6, 131.6, 129.7, 128.6, 127.8 (2C), 123.1, 120.8, 119.0, 117.7, 114.4 (2C), 113.0, 55.6, 52.2, 51.7, 30.6, 21.7. HRMS (ESI-TOF)  $m/z$ :  $[\text{M} + \text{H}]^+$  Calcd for  $\text{C}_{29}\text{H}_{28}\text{NO}_8\text{S}$ : 550.1536, Found: 550.1539.

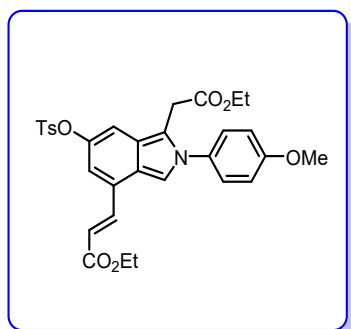

**Ethyl** (*E*)-3-(1-(2-ethoxy-2-oxoethyl)-2-(4-methoxyphenyl)-6-(tosyloxy)-2H-isoindol-4-yl)acrylate (**6b**),  $^1\text{H}$  NMR (400 MHz,  $\text{CDCl}_3$ )  $\delta$  7.76 (d,  $J = 8.4$  Hz, 2H), 7.71 (d,  $J = 16.0$  Hz, 1H), 7.44 (s, 1H), 7.35-7.30 (m, 5H), 7.00 (dd,  $J = 2.0$  Hz, 5.2 Hz, 2H), 6.69 (d,  $J = 1.6$  Hz, 1H), 6.37 (d,  $J = 16.0$  Hz, 1H), 4.24 (q,  $J = 7.2$  Hz, 2H), 4.07 (q,  $J = 7.2$  Hz, 2H), 3.88 (s, 3H), 3.78 (s, 2H), 2.45 (s, 3H), 1.32 (t,  $J = 7.2$  Hz, 3H), 1.12 (t,  $J = 7.2$  Hz, 3H).  $^{13}\text{C}$  NMR (100 MHz,  $\text{CDCl}_3$ )  $\delta$  169.8, 167.1, 159.9, 145.3, 143.7, 142.7, 132.6, 131.7, 129.7, 128.6, 127.8, 123.1, 120.8, 119.5, 119.4, 117.9, 114.4, 114.4, 113.0, 61.2, 60.5, 55.6, 30.9, 21.7, 14.3, 14.1. HRMS (ESI-TOF)  $m/z$ :  $[\text{M} + \text{H}]^+$  Calcd for  $\text{C}_{31}\text{H}_{32}\text{NO}_8\text{S}$ : 578.1849, Found: 578.1852.

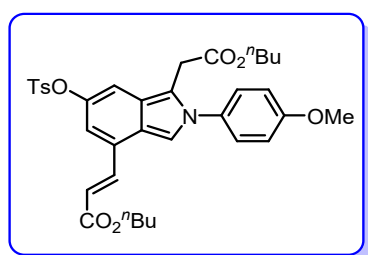

**Butyl** (*E*)-3-(1-(2-butoxy-2-oxoethyl)-2-(4-methoxyphenyl)-6-(tosyloxy)-2H-isoindol-4-yl)acrylate (**6c**),  $^1\text{H}$  NMR (400 MHz,  $\text{CDCl}_3$ )  $\delta$  7.77 (s, 1H), 7.75-7.69 (m, 2H), 7.43 (s, 1H), 7.34-7.31 (m, 4H), 7.29 (d,  $J = 0.8$  Hz, 1H), 7.00 (dd,  $J = 2.0$  Hz, 4.4 Hz, 2H), 6.69 (d,  $J = 2.0$  Hz, 1H), 6.37 (d,  $J = 16.4$  Hz, 1H), 4.19 (t,  $J = 5.2$  Hz, 2H), 4.01 (t,  $J = 6.8$  Hz, 2H), 3.88 (s, 3H), 3.80 (d,  $J = 14.2$  Hz, 2H), 3.45 (s, 3H), 1.71-1.64



(m, 2H), 1.55-1.50 (m, 2H), 1.43-1.38 (m, 2H), 1.30-1.25 (m, 2H), 0.95 (t,  $J = 7.2$  Hz, 3H), 0.88 (t,  $J = 7.2$  Hz, 3H).  $^{13}\text{C}$  NMR (100 MHz,  $\text{CDCl}_3$ )  $\delta$  169.9, 167.2, 159.9, 145.3, 143.7, 142.7, 132.6, 131.7, 129.7, 128.6, 127.8, 123.2, 120.9, 119.5, 119.4, 118.0, 114.4, 114.3, 113.0, 65.1, 64.5, 55.6, 30.9, 30.8, 30.5, 21.7, 19.1, 19.0, 13.7, 13.6. HRMS (ESI-TOF)  $m/z$ :  $[\text{M} + \text{H}]^+$  Calcd for  $\text{C}_{35}\text{H}_{40}\text{NO}_8\text{S}$ : 634.2475, Found: 634.2477.

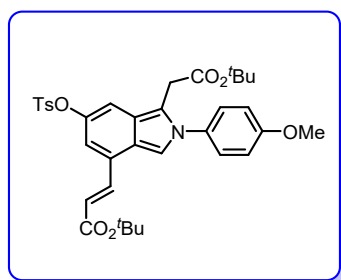

**tert-Butyl (*E*)-3-(1-(2-(*tert*-butoxy)-2-oxoethyl)-2-(4-methoxyphenyl)-6-(tosyloxy)-2H-isoindol-4-yl)acrylate (6d)**,  $^1\text{H}$  NMR (400 MHz,  $\text{CDCl}_3$ )  $\delta$  7.76 (d,  $J = 8.4$  Hz, 2H), 7.62 (d,  $J = 16.0$  Hz, 1H), 7.41 (s, 1H), 7.36 (dd,  $J = 2.0$  Hz, 6.4 Hz, 2H), 7.33-7.31 (m, 3H), 7.01 (dd,  $J = 2.0$  Hz, 6.8 Hz, 2H), 6.65 (d,  $J = 1.6$  Hz, 1H), 6.29 (d,  $J = 16.0$  Hz, 1H), 3.88 (s, 3H), 3.70 (s, 2H), 2.45 (s, 3H), 1.52 (s, 9H), 1.38 (s, 9H).  $^{13}\text{C}$  NMR (100 MHz,  $\text{CDCl}_3$ )  $\delta$  169.1, 166.5, 159.8, 145.2, 143.7, 141.8, 132.7, 131.9, 129.7, 128.62, 128.0, 127.9, 123.1, 121.3, 120.4, 119.6, 118.5, 114.3, 114.2, 112.7, 81.6, 80.6, 55.6, 32.2, 28.2, 27.9, 21.7. HRMS (ESI-TOF)  $m/z$ :  $[\text{M} + \text{H}]^+$  Calcd for  $\text{C}_{35}\text{H}_{40}\text{NO}_8\text{S}$  : 634.2475, Found: 634.2478.

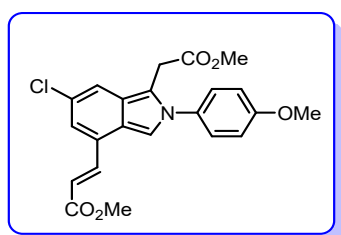

**Methyl (*E*)-3-(6-chloro-1-(2-methoxy-2-oxoethyl)-2-(4-methoxyphenyl)-2H-isoindol-4-yl)acrylate (6f)**,  $^1\text{H}$  NMR (400 MHz,  $\text{CDCl}_3$ )  $\delta$  7.85 (d,  $J = 16.0$  Hz, 1H), 7.57 (s, 1H), 7.35 (s, 1H), 7.34 (dd,  $J = 2.0$  Hz, 6.0 Hz, 2H), 7.16 (d,  $J = 1.2$  Hz, 1H), 7.01 (dd,  $J = 2.4$  Hz, 6.0 Hz, 2H), 6.53 (d,  $J = 16$  Hz, 1H), 3.89 (s, 3H), 3.85 (s, 2H), 3.81 (s, 3H), 3.65 (s, 3H).  $^{13}\text{C}$  NMR (100 MHz,  $\text{CDCl}_3$ )  $\delta$  170.4, 167.6, 159.9, 143.1,

131.7, 128.0, 127.8, 126.5, 126.4, 120.4, 119.0, 116.5, 114.4, 113.2, 55.6, 52.3, 51.7, 30.7. HRMS (ESI-TOF)  $m/z$ :  $[M + H]^+$  Calcd for  $C_{22}H_{21}ClNO_5$ : 414.1108, Found: 414.1109.

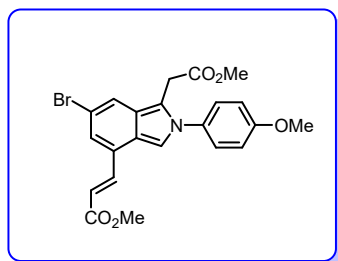

**Methyl (E)-3-(2-(4-chlorophenyl)-1-(2-methoxy-2-oxoethyl)-6-(tosyloxy)-2H-isoindol-4-yl)acrylate (6g)**,  $^1H$  NMR (400 MHz,  $CDCl_3$ )  $\delta$  7.83 (d,  $J = 16.0$  Hz, 1H), 7.75 (s, 1H), 7.45 (s, 1H), 7.34 (dd,  $J = 2.0$  Hz, 6.4 Hz, 2H), 7.28 (s, 1H), 7.01 (dd,  $J = 1.6$  Hz, 6.8 Hz, 2H), 6.52 (d,  $J = 16.4$  Hz, 1H), 3.89 (s, 3H), 3.84 (s, 2H), 3.81 (s, 3H), 3.64 (s, 3H).  $^{13}C$  NMR (100 MHz,  $CDCl_3$ )  $\delta$  170.3, 167.5, 159.9, 143.0, 131.7, 128.7, 127.8, 126.1, 125.0, 123.8, 119.4, 119.0, 116.4, 114.4, 114.1, 113.2, 55.6, 52.3, 51.7, 30.7. HRMS (ESI-TOF)  $m/z$ :  $[M + H]^+$  Calcd for  $C_{22}H_{21}BrNO_5$ : 458.0603, Found: 458.0605.

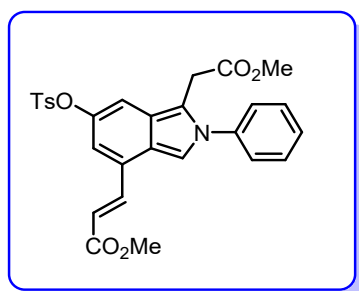

**Methyl (E)-3-(1-(2-methoxy-2-oxoethyl)-2-phenyl-6-(tosyloxy)-2H-isoindol-4-yl)acrylate (6h)**,  $^1H$  NMR (400 MHz,  $CDCl_3$ )  $\delta$  7.77z (s, 1H), 7.73f (d,  $J = 15.2$  Hz, 2H), 7.53-7.51 (m, 3H), 7.47 (d,  $J = 0.4$  Hz, 1H), 7.41 (dd,  $J = 1.6$  Hz, 8.0 Hz, 2H), 7.34 (d,  $J = 8.0$  Hz, 2H), 7.29 (d,  $J = 1.2$  Hz, 1H), 6.72 (d,  $J = 1.6$  Hz, 1H), 6.39 (d,  $J = 16.0$  Hz, 1H), 3.83 (s, 2H), 3.79 (s, 3H), 3.61 (s, 3H), 2.47 (s, 3H).  $^{13}C$  NMR (100 MHz,  $CDCl_3$ )  $\delta$  170.1, 167.5, 145.3, 143.8, 142.8, 138.9, 132.5, 129.7, 129.4, 129.0, 128.6, 127.9, 126.6, 123.3, 121.0, 119.7, 119.1, 117.5, 114.4, 112.9, 52.2, 51.7, 30.7,

21.7. HRMS (ESI-TOF)  $m/z$ :  $[M + H]^+$  Calcd for  $C_{28}H_{26}NO_7S$ : 520.1430, Found: 520.1433.

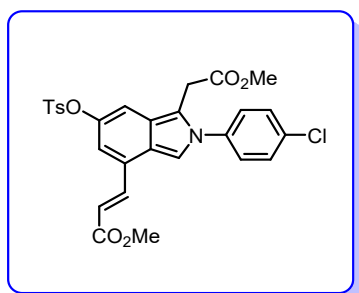

**Methyl (E)-3-(2-(4-chlorophenyl)-1-(2-methoxy-2-oxoethyl)-6-(tosyloxy)-2H-isoindol-4-yl)acrylate (6i)**,  $^1H$  NMR (400 MHz,  $CDCl_3$ )  $\delta$  7.77-7.71 (m, 3H), 7.51 (dd,  $J = 2.0$  Hz, 6.4 Hz, 2H), 7.44 (s, 1H), 7.38 (dd,  $J = 2.4$  Hz, 6.8 Hz, 2H), 7.33 (d,  $J = 8.4$  Hz, 2H), 7.30 (d,  $J = 1.2$  Hz, 1H), 6.72 (d,  $J = 1.6$  Hz, 1H), 6.38 (d,  $J = 16.0$  Hz, 1H), 3.81 (s, 2H), 3.80 (s, 3H), 3.64 (s, 3H).  $^{13}C$  NMR (100 MHz,  $CDCl_3$ )  $\delta$  170.0, 167.4, 145.4, 144.0, 142.6, 137.4, 135.2, 132.6, 129.8, 129.6, 128.6, 127.9, 123.5, 121.0, 119.9, 119.2, 117.5, 114.4, 112.8, 52.4, 51.8, 30.6, 21.7. HRMS (ESI-TOF)  $m/z$ :  $[M + H]^+$  Calcd for  $C_{28}H_{25}ClNO_7S$  : 554.1040, Found: 554.1044.

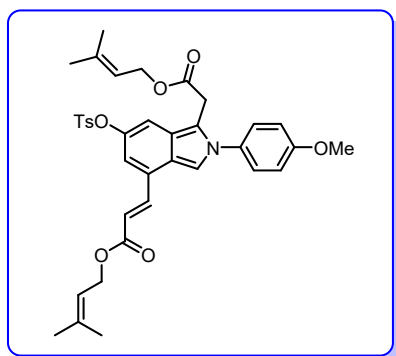

**3-Methylbut-2-en-1-yl (E)-3-(2-(4-methoxyphenyl)-1-(2-((3-methylbut-2-en-1-yl)oxy)-2-oxoethyl)-6-(tosyloxy)-2H-isoindol-4-yl)acrylate (6j)**,  $^1H$  NMR (400 MHz,  $CDCl_3$ )  $\delta$  7.75 (d,  $J = 8.0$  Hz, 2H), 7.71 (d,  $J = 16.0$  Hz, 1H), 7.43 (s, 1H), 7.32 (d,  $J = 8.8$  Hz, 5H), 6.99 (d,  $J = 8.8$  Hz, 2H), 6.67 (d,  $J = 1.6$  Hz, 1H), 6.38 (d,  $J = 16.0$  Hz, 1H), 5.41 (t,  $J = 3.2$  Hz, 1H), 5.26 (t,  $J = 3.2$  Hz, 1H), 4.69 (d,  $J = 7.2$  Hz, 2H), 4.51 (d,  $J = 7.2$  Hz, 2H), 3.88 (s, 3H), 3.78 (s, 2H), 2.45 (s, 3H), 1.77 (s, 3H), 1.74 (d,  $J = 4.0$  Hz, 6H), 1.66 (s, 3H).  $^{13}C$  NMR (100 MHz,  $CDCl_3$ )  $\delta$  169.8, 167.1, 159.8, 145.3,

143.7, 142.8, 139.6, 139.3, 132.6, 131.7, 129.7, 128.6, 127.8, 123.1, 121.0, 119.4, 119.3, 118.5, 118.1, 118.0, 114.5, 114.3, 113.0, 62.1, 61.5, 55.6, 30.9, 25.8, 25.7, 21.6, 18.0, 17.9. HRMS (ESI-TOF)  $m/z$ :  $[M + H]^+$  Calcd for  $C_{37}H_{40}NO_8S$ : 658.2475, Found: 658.2477.

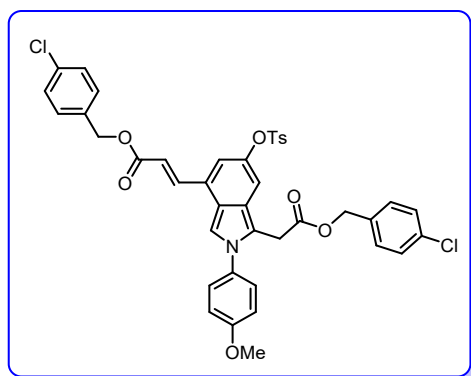

**4-Chlorobenzyl** (*E*)-3-(1-(2-((4-chlorobenzyl)oxy)-2-oxoethyl)-2-(4-methoxyphenyl)-6-(tosyloxy)-2H-isoindol-4-yl)acrylate (**6k**),  $^1H$  NMR (400 MHz,  $CDCl_3$ )  $\delta$  7.77-7.34 (m, 3H), 7.41 (s, 1H), 7.31 (s, 4H), 7.25 (d,  $J = 12.8$  Hz, 5H), 7.23 (dd,  $J = 2.0$  Hz, 6.8 Hz, 4H), 7.15 (d,  $J = 8.4$  Hz, 2H), 6.92 (dd,  $J = 2.0$  Hz, 6.8 Hz, 2H), 6.71 (d,  $J = 1.6$  Hz, 1H), 6.41 (d,  $J = 16.0$  Hz, 1H), 5.19 (s, 2H), 5.01 (s, 2H), 3.86 (s, 3H), 3.84 (s, 2H), 2.43 (s, 3H).  $^{13}C$  NMR (100 MHz,  $CDCl_3$ )  $\delta$  169.4, 166.7, 159.9, 145.3, 143.7, 143.5, 134.5, 134.3, 134.2, 133.9, 132.6, 131.5, 129.7, 129.7, 128.7, 128.7, 128.6, 127.7, 123.3, 121.2, 119.4, 118.8, 117.6, 114.6, 114.4, 113.2, 66.0, 65.6, 55.6, 30.8, 21.7. HRMS (ESI-TOF)  $m/z$ :  $[M + H]^+$  Calcd for  $C_{41}H_{35}Cl_2NO_8S$ : 771.1460, Found: 771.1462.

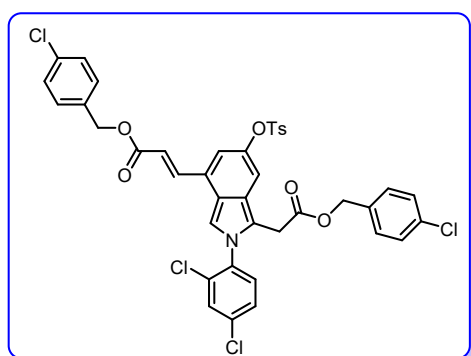

**4-Chlorobenzyl** (*E*)-3-(1-(2-((4-chlorobenzyl)oxy)-2-oxoethyl)-2-(2,4-dichlorophenyl)-6-(tosyloxy)-2H-isoindol-4-yl)acrylate (**6l**),  $^1H$  NMR (400 MHz,

$\text{CDCl}_3$ )  $\delta$  7.74 (dd,  $J = 3.6$  Hz, 12.0 Hz, 3H), 7.52-7.50 (m, 2H), 7.41 (s, 1H), 7.34 (s, 4H), 7.33-7.30 (m, 5H), 7.23 (dd,  $J = 2.4$  Hz, 8.4 Hz, 1H), 7.18-7.16 (m, 2H), 6.73 (d,  $J = 1.6$  Hz, 1H), 6.40 (d,  $J = 16.0$  Hz, 1H), 5.20 (s, 2H), 5.02 (s, 2H), 3.85 (s, 2H), 2.43 (s, 3H).  $^{13}\text{C}$  NMR (100 MHz,  $\text{CDCl}_3$ )  $\delta$  169.2, 166.6, 145.4, 144.1, 143.0, 138.0, 134.5, 134.4, 134.2, 133.7, 133.6, 133.5, 132.5, 131.0, 129.8, 129.8, 129.8, 128.9, 128.8, 128.5, 127.9, 125.9, 123.8, 121.7, 112.0, 119.2, 117.2, 114.4, 112.9, 66.4, 65.7, 30.8, 21.7. HRMS (ESI-TOF)  $m/z$ :  $[\text{M} + \text{H}]^+$  Calcd for  $\text{C}_{40}\text{H}_{31}\text{Cl}_4\text{NO}_7\text{S}$ : 811.0546, Found: 811.0548.

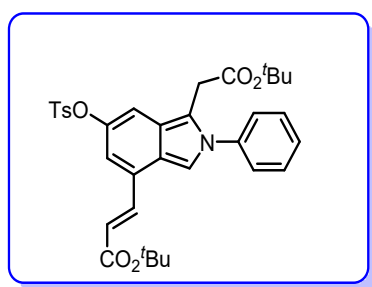

*tert*-Butyl (*E*)-3-(1-(2-(*tert*-butoxy)-2-oxoethyl)-2-phenyl-6-(tosyloxy)-2*H*-isoindol-4-yl)acrylate (**6n**),  $^1\text{H}$  NMR (400 MHz,  $\text{CDCl}_3$ )  $\delta$  7.76 (d,  $J = 8.0$  Hz, 2H), 7.63 (d,  $J = 16.0$  Hz, 1H), 7.51-7.49 (m, 3H), 7.45-7.43 (m, 3H), 7.32 (d,  $J = 8.0$  Hz, 3H), 6.66 (d,  $J = 1.6$  Hz, 1H), 6.30 (d,  $J = 16.0$  Hz, 1H), 3.73 (s, 2H), 2.45 (s, 3H), 1.52 (s, 9H), 1.36 (s, 9H).  $^{13}\text{C}$  NMR (100 MHz,  $\text{CDCl}_3$ )  $\delta$  169.0, 166.4, 145.2, 143.8, 141.7, 139.1, 132.6, 129.7, 129.3, 128.8, 128.6, 128.1, 126.7, 123.3, 121.4, 120.5, 119.8, 118.2, 114.2, 112.6, 81.6, 80.6, 32.2, 28.2, 27.9, 21.7. HRMS (ESI-TOF)  $m/z$ :  $[\text{M} + \text{H}]^+$  Calcd for  $\text{C}_{34}\text{H}_{39}\text{NO}_7\text{S}$  : 605.2447, Found: 605.2449.

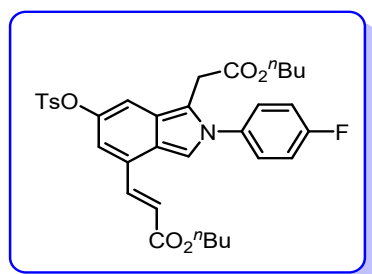

Butyl (*E*)-3-(1-(2-butoxy-2-oxoethyl)-2-(4-fluorophenyl)-6-(tosyloxy)-2*H*-isoindol-4-yl)acrylate (**6o**),  $^1\text{H}$  NMR (400 MHz,  $\text{CDCl}_3$ )  $\delta$  7.77-7.75 (m, 2H), 7.71 (d,  $J = 16.0$

Hz, 1H), 7.44 (s, 1H), 7.43-7.41 (m, 2H), 7.33 (d,  $J = 8.0$  Hz, 2H), 7.30 (d,  $J = 2.0$  Hz, 1H), 7.23-7.19 (m, 2H), 6.70 (d,  $J = 1.6$  Hz, 1H), 6.36 (d,  $J = 16.0$  Hz, 1H), 4.20 (t,  $J = 2.4$  Hz, 2H), 4.02 (t,  $J = 2.8$  Hz, 2H), 3.78 (s, 2H), 2.46 (s, 3H), 1.70-1.66 (m, 2H), 1.56-1.51 (m, 2H), 1.45-1.40 (m, 2H), 1.33-1.27 (m, 2H), 0.96 (t,  $J = 7.2$  Hz, 3H), 0.89 (t,  $J = 7.2$  Hz, 3H).  $^{13}\text{C}$  NMR (100 MHz,  $\text{CDCl}_3$ )  $\delta$  169.7, 167.1, 162.7 (d,  $J = 254.0$  Hz), 145.3, 143.9, 142.5, 137.2, 132.6, 130.0, 129.8, 128.6, 128.5, 128.0, 123.4, 121.0, 119.8, 119.6, 118.2, 117.9, 116.4, 116.2, 114.3, 113.0, 65.2, 64.5, 30.8, 30.7, 30.6, 30.5, 21.7, 19.2, 19.1, 19.0, 13.7, 13.6.  $^{19}\text{F}$  NMR (60 MHz,  $\text{CDCl}_3$ )  $\delta$  -114.6. HRMS (ESI-TOF)  $m/z$ :  $[\text{M} + \text{H}]^+$  Calcd for  $\text{C}_{34}\text{H}_{38}\text{FNO}_7\text{S}$ : 623.2353, Found: 623.2358.

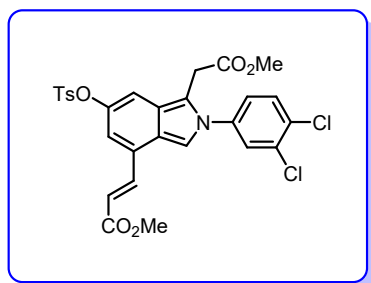

**Methyl (*E*)-3-(2-(3,4-dichlorophenyl)-1-(2-methoxy-2-oxoethyl)-6-(tosyloxy)-2H-isoindol-4-yl)acrylate (6p)**,  $^1\text{H}$  NMR (400 MHz,  $\text{CDCl}_3$ )  $\delta$  7.77-7.74 (m, 3H), 7.61 (d,  $J = 8.8$  Hz, 1H), 7.58 (d,  $J = 2.4$  Hz, 1H), 7.43 (s, 1H), 7.39-7.36 (m, 2H), 7.34-7.31 (m, 3H), 7.29 (d,  $J = 1.6$  Hz, 1H), 6.72 (d,  $J = 16$  Hz, 1H), 6.37 (d,  $J = 16.4$  Hz, 1H), 3.81 (s, 2H), 3.80 (s, 3H), 3.67 (s, 3H).  $^{13}\text{C}$  NMR (100 MHz,  $\text{CDCl}_3$ )  $\delta$  169.9, 167.4, 145.4, 144.2, 142.5, 138.0, 133.5, 132.5, 131.1, 130.1, 129.8, 128.7, 128.6, 128.0, 125.9, 123.7, 121.2, 119.4, 117.5, 114.3, 112.8, 52.5, 51.8, 30.6, 21.7. HRMS (ESI-TOF)  $m/z$ :  $[\text{M} + \text{H}]^+$  Calcd for  $\text{C}_{28}\text{H}_{25}\text{Cl}_2\text{NO}_7\text{S}$ : 589.0729, Found: 589.0733.

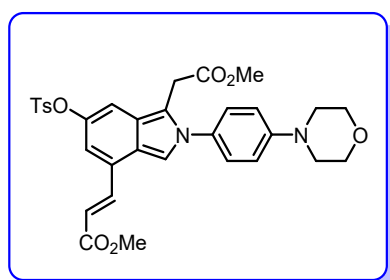

**Methyl** (*E*)-3-(1-(2-methoxy-2-oxoethyl)-2-(4-morpholinophenyl)-6-(tosyloxy)-2*H*-isoindol-4-yl)acrylate (**6q**), <sup>1</sup>H NMR (400 MHz, CDCl<sub>3</sub>) δ 7.77-7.71 (m, 3H), 7.42 (s, 1H), 7.32 (d, *J* = 8.0 Hz, 2H), 7.30-7.28 (m, 3H), 6.98 (d, *J* = 8.8 Hz, 2H), 6.69 (d, *J* = 1.6 Hz, 1H), 6.38 (d, *J* = 16.0 Hz, 1H), 3.90 (t, *J* = 4.8 Hz, 4H), 3.81 (s, 2H), 3.79 (s, 3H), 3.63 (s, 3H), 3.25 (t, *J* = 4.8 Hz, 4H), 2.46 (s, 3H). <sup>13</sup>C NMR (100 MHz, CDCl<sub>3</sub>) δ 170.3, 167.5, 151.5, 145.3, 143.7, 143.0, 132.6, 130.5, 129.8, 128.7, 127.8, 127.4, 123.0, 120.8, 119.5, 119.0, 117.7, 115.4, 114.5, 113.0, 66.7, 52.3, 51.7, 48.7, 30.7, 21.7. HRMS (ESI-TOF) *m/z*: [M + H]<sup>+</sup> Calcd for C<sub>32</sub>H<sub>34</sub>N<sub>2</sub>O<sub>8</sub>S: 606.2036, Found: 606.2037.

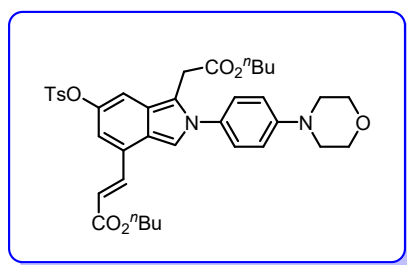

**tert-Butyl** (*E*)-3-(1-(2-(*tert*-butoxy)-2-oxoethyl)-2-(4-morpholinophenyl)-6-(tosyloxy)-2*H*-isoindol-4-yl)acrylate (**6r**), <sup>1</sup>H NMR (400 MHz, CDCl<sub>3</sub>) δ 7.75 (d, *J* = 8.4 Hz, 2H), 7.21 (d, *J* = 16.0 Hz, 1H), 7.42 (s, 1H), 7.33-7.29 (m, 5H), 6.97 (d, *J* = 8.8 Hz, 2H), 6.68 (d, *J* = 1.6 Hz, 1H), 6.37 (d, *J* = 16.0 Hz, 1H), 4.19 (t, *J* = 6.4 Hz, 2H), 4.02 (t, *J* = 6.8 Hz, 2H), 3.89 (t, *J* = 4.8 Hz, 4H), 3.79 (s, 2H), 3.24 (t, *J* = 4.8 Hz, 4H), 2.45 (s, 3H), 1.69-1.64 (m, 2H), 1.58-1.51 (m, 2H), 1.45-1.40 (m, 2H), 1.33-1.25 (m, 2H), 0.95 (t, *J* = 7.2 Hz, 3H), 0.89 (t, *J* = 7.2 Hz, 3H). <sup>13</sup>C NMR (100 MHz, CDCl<sub>3</sub>) δ 169.9, 167.2, 151.4, 145.3, 143.7, 142.7, 132.6, 130.6, 129.7, 128.6, 127.8, 127.4, 123.1, 120.8, 119.5, 119.4, 117.9, 115.3, 114.5, 112.9, 66.7, 65.1, 64.5, 48.7, 30.9, 30.74, 30.5, 21.7, 19.2, 19.0, 13.7, 13.6. HRMS (ESI-TOF) *m/z*: [M + H]<sup>+</sup> Calcd for C<sub>38</sub>H<sub>46</sub>N<sub>2</sub>O<sub>8</sub>S: 690.2975, Found: 690.2977.

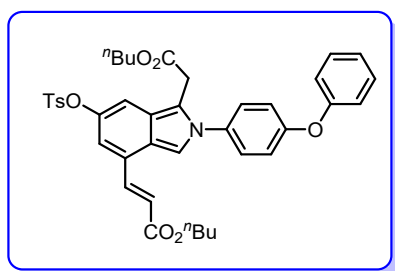

**Butyl** (*E*)-3-(1-(2-butoxy-2-oxoethyl)-2-(4-phenoxyphenyl)-6-(tosyloxy)-2*H*-isoindol-4-yl)acrylate (**6s**),  $^1\text{H NMR}$  (400 MHz,  $\text{CDCl}_3$ )  $\delta$  7.76 (d,  $J = 8.4$  Hz, 2H), 7.72 (d,  $J = 16.4$  Hz, 1H), 7.46 (s, 1H), 7.41-7.36 (m, 5H), 7.34-7.30 (m, 3H), 7.19-7.17 (m, 1H), 7.10 (dd,  $J = 2.0$  Hz, 5.6 Hz, 4H), 6.70 (d,  $J = 1.6$  Hz, 1H), 6.38 (d,  $J = 16.0$  Hz, 1H), 4.21 (t,  $J = 2.4$  Hz, 2H), 4.03 (t,  $J = 2.8$  Hz, 2H), 3.82 (s, 2H), 2.46 (s, 3H), 1.72-1.65 (m, 2H), 1.59-1.51 (m, 2H), 1.46-1.41 (m, 2H), 1.34-1.26 (m, 2H), 0.96 (t,  $J = 3.2$  Hz, 3H), 0.89 (t,  $J = 3.2$  Hz, 3H).  $^{13}\text{C NMR}$  (100 MHz,  $\text{CDCl}_3$ )  $\delta$  169.8, 167.2, 158.2, 156.1, 145.3, 143.8, 142.6, 133.6, 132.6, 130.0, 129.7, 128.6, 128.1, 127.9, 124.3, 123.3, 120.9, 119.7, 119.6, 119.5, 118.5, 117.9, 114.4, 112.9, 65.1, 64.5, 30.9, 30.7, 30.5, 21.7, 19.1, 19.0, 13.7, 13.6. HRMS (ESI-TOF)  $m/z$ :  $[\text{M} + \text{H}]^+$  Calcd for  $\text{C}_{40}\text{H}_{43}\text{NO}_8\text{S}$ : 697.2709, Found: 697.2711.

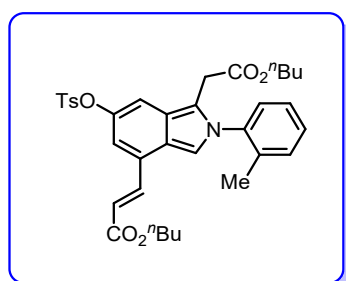

**Butyl** (*E*)-3-(1-(2-butoxy-2-oxoethyl)-2-(*o*-tolyl)-6-(tosyloxy)-2*H*-isoindol-4-yl)acrylate (**6t**),  $^1\text{H NMR}$  (400 MHz,  $\text{CDCl}_3$ )  $\delta$  7.78 (d,  $J = 8.4$  Hz, 2H), 7.72 (d,  $J = 16.0$  Hz, 1H), 7.42 (dd,  $J = 1.2$  Hz, 7.2 Hz, 1H), 7.37 (s, 1H), 7.35 (s, 2H), 7.33 (t,  $J = 2.0$  Hz, 2H), 7.32-7.30 (m, 1H), 7.26-7.24 (m, 1H), 6.71 (d,  $J = 2.0$  Hz, 1H), 6.36 (d,  $J = 16.0$  Hz, 1H), 4.12 (t,  $J = 1.6$  Hz, 2H), 3.96 (t,  $J = 2.8$  Hz, 2H), 3.75 (d,  $J = 16.4$  Hz, 1H), 3.56 (d,  $J = 16.4$  Hz, 1H), 2.46 (s, 3H), 1.98 (s, 3H), 1.69-1.65 (m, 2H), 1.51-1.46 (m, 2H), 1.43-1.39 (m, 2H), 1.26-1.20 (m, 2H), 0.95 (t,  $J = 7.2$  Hz, 3H), 0.86 (t,  $J = 7.2$  Hz, 3H).  $^{13}\text{C NMR}$  (100 MHz,  $\text{CDCl}_3$ )  $\delta$  167.2, 145.3, 143.7, 142.7, 137.7, 135.5,



132.7, 130.9, 129.7, 129.6, 128.6, 127.9, 127.9, 126.6, 122.8, 120.9, 119.7, 119.4, 117.9, 114.6, 112.3, 65.0, 64.4, 30.7, 30.4, 21.7, 19.1, 18.9, 17.1, 13.7, 13.6. HRMS (ESI-TOF)  $m/z$ :  $[M + H]^+$  Calcd for  $C_{35}H_{41}NO_7S$ : 619.2604, Found: 619.2609.

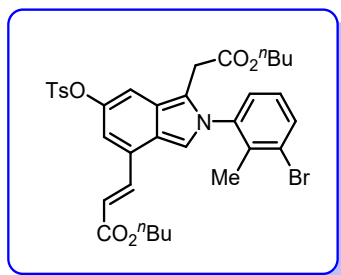

**Butyl (E)-3-(2-(3-bromo-2-methylphenyl)-1-(2-butoxy-2-oxoethyl)-6-(tosyloxy)-2H-isoindol-4-yl)acrylate (6u),  $^1H$  NMR (400 MHz,  $CDCl_3$ )  $\delta$  7.78 (d,  $J = 8.4$  Hz, 2H), 7.73-7.69 (m, 2H), 7.38-7.33 (m, 4H), 7.24 (d,  $J = 1.2$  Hz, 1H), 7.20 (d,  $J = 8.0$  Hz, 1H), 6.71 (d,  $J = 1.6$  Hz, 1H), 6.34 (d,  $J = 16.0$  Hz, 1H), 4.12 (t,  $J = 2.8$  Hz, 2H), 3.98 (t,  $J = 2.8$  Hz, 2H), 3.75 (d,  $J = 16.4$  Hz, 1H), 3.52 (d,  $J = 16.8$  Hz, 1H), 2.46 (s, 3H), 1.98 (s, 3H), 1.70-1.63 (m, 2H), 1.51-1.46 (m, 2H), 1.44-1.39 (m, 2H), 1.28-1.21 (m, 2H), 0.95 (t,  $J = 7.2$  Hz, 3H), 0.87 (t,  $J = 2.8$  Hz, 2H).  $^{13}C$  NMR (100 MHz,  $CDCl_3$ )  $\delta$  169.3, 167.1, 145.3, 143.9, 142.5, 138.7, 136.2, 133.9, 132.7, 129.7, 128.6, 128.0, 127.3, 127.2, 126.0, 122.9, 121.0, 119.8, 119.9, 118.1, 114.5, 112.4, 65.1, 64.5, 30.7, 30.7, 30.4, 21.7, 19.1, 19.0, 18.9, 17.9, 13.7, 13.6. HRMS (ESI-TOF)  $m/z$ :  $[M + H]^+$  Calcd for  $C_{35}H_{40}BrNO_7S$ : 697.1709, Found: 697.1712.**

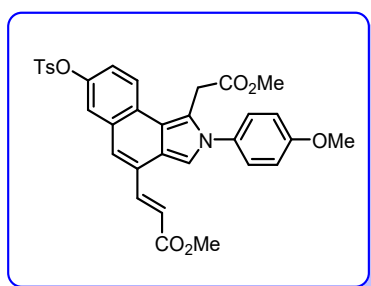

**Methyl (E)-3-(1-(2-methoxy-2-oxoethyl)-2-(4-methoxyphenyl)-7-(tosyloxy)-2H-benzo[e]isoindol-4-yl)acrylate (6v),  $^1H$  NMR (400 MHz,  $CDCl_3$ )  $\delta$  7.95 (d,  $J = 8.8$  Hz, 1H), 7.90 (d,  $J = 16.0$  Hz, 1H), 7.71 (d,  $J = 8.4$  Hz, 2H), 7.52 (s, 1H), 7.36 (dd,  $J = 1.6$  Hz, 7.8 Hz, 2H), 7.32 (d,  $J = 2.4$  Hz, 1H), 7.30 (s, 2H), 7.28 (s, 1H), 7.16 (dd,  $J =$**

2.4 Hz, 8.8 Hz, 1H), 7.02 (dd,  $J = 1.6$  Hz, 7.8 Hz, 2H), 6.58 (d,  $J = 16.0$  Hz, 1H), 4.05 (s, 2H), 3.89 (s, 3H), 3.81 (s, 3H), 3.69 (s, 3H), 2.44 (s, 3H).  $^{13}\text{C}$  NMR (100 MHz,  $\text{CDCl}_3$ )  $\delta$  170.7, 167.6, 159.9, 146.3, 145.3, 143.4, 132.3, 131.8, 131.6, 129.7, 128.6, 128.4, 128.2, 127.6, 126.4, 123.6, 122.1, 121.9, 119.4, 119.3, 119.2, 118.1, 114.9, 114.4, 55.6, 52.4, 51.7, 29.7, 21.7. HRMS (ESI-TOF)  $m/z$ :  $[\text{M} + \text{H}]^+$  Calcd for  $\text{C}_{33}\text{H}_{40}\text{NO}_8\text{S}$ : 600.1770, Found: 600.1776.

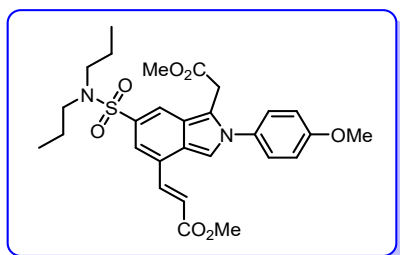

**Methyl (E)-3-(6-(N,N-dipropylsulfamoyl)-1-(2-methoxy-2-oxoethyl)-2-(4-methoxyphenyl)-2H-isoindol-4-yl)acrylate (6w)**,  $^1\text{H}$  NMR (400 MHz,  $\text{CDCl}_3$ )  $\delta$  8.18 (s, 1H), 7.90 (d,  $J = 16.0$  Hz, 1H), 7.51 (s, 1H), 7.50 (s, 1H), 7.33 (d,  $J = 8.8$  Hz, 2H), 7.01 (d,  $J = 8.8$  Hz, 2H), 6.55 (d,  $J = 16.0$  Hz, 1H), 3.93 (s, 2H), 3.87 (s, 3H), 3.80 (s, 3H), 3.63 (s, 3H), 3.12 (t,  $J = 7.6$  Hz, 4H), 1.61-1.55 (m, 4H), 0.88 (t,  $J = 7.6$  Hz, 6H).  $^{13}\text{C}$  NMR (100 MHz,  $\text{CDCl}_3$ )  $\delta$  169.9, 167.4, 160.1, 143.2, 132.1, 131.3, 127.7, 127.4, 123.6, 122.6, 122.1, 120.8, 120.4, 119.4, 114.5, 113.6, 55.6, 52.3, 51.7, 50.0, 30.6, 22.1, 11.2. HRMS (ESI-TOF)  $m/z$ :  $[\text{M} + \text{H}]^+$  Calcd for  $\text{C}_{28}\text{H}_{35}\text{N}_2\text{O}_7\text{S}$ : 543.2243, Found: 543.2249.

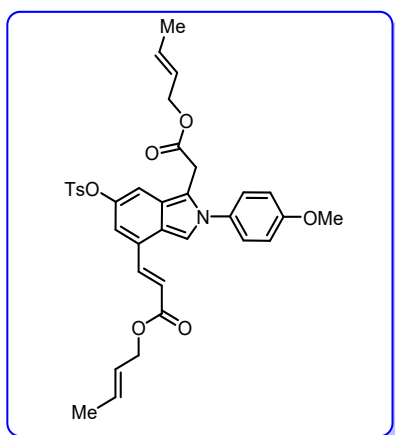

**(E)-But-2-en-1-yl**                      **(E)-3-(1-(2-(((E)-but-2-en-1-yl)oxy)-2-oxoethyl)-2-(4-methoxyphenyl)-6-(tosyloxy)-2H-isoindol-4-yl)acrylate (6x)**,  $^1\text{H NMR}$  (400 MHz,  $\text{CDCl}_3$ )  $\delta$  7.75 (d,  $J = 8.4$  Hz, 2H), 7.72 (d,  $J = 16.0$  Hz, 1H), 7.43 (s, 1H), 7.34 (d,  $J = 8.8$  Hz, 5H), 7.00 (dd,  $J = 2.4$  Hz, 6.8 Hz, 2H), 6.68 (d,  $J = 1.6$  Hz, 1H), 6.38 (d,  $J = 16.0$  Hz, 1H), 5.87-5.80 (m, 1H), 5.78-5.70 (m, 1H), 5.69-5.61 (m, 1H), 5.55-5.49 (m, 1H), 4.62 (d,  $J = 6.8$  Hz, 2H), 4.44 (d,  $J = 6.4$  Hz, 2H), 3.88 (s, 3H), 3.79 (s, 2H), 2.45 (s, 3H), 1.75-1.73 (m, 3H), 1.72-1.70 (m, 3H).  $^{13}\text{C NMR}$  (100 MHz,  $\text{CDCl}_3$ )  $\delta$  169.6, 166.9, 159.9, 145.3, 143.7, 143.0, 132.6, 131.9, 131.7, 131.6, 129.7, 128.6, 127.8, 127.8, 125.1, 124.6, 123.2, 121.0, 119.4, 119.2, 117.9, 114.5, 114.4, 113.1, 65.9, 65.3, 55.6, 30.9, 29.7, 21.7, 17.8, 17.7. HRMS (ESI-TOF)  $m/z$ :  $[\text{M} + \text{H}]^+$  Calcd for  $\text{C}_{35}\text{H}_{37}\text{NO}_8\text{S}$ : 631.2240, Found: 631.2244.

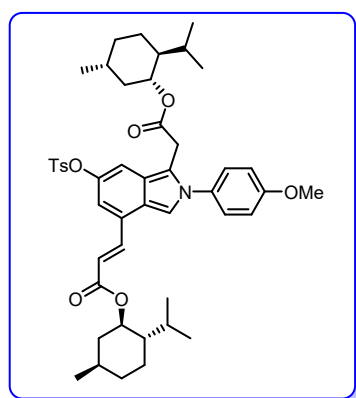

**(1R,2S,5R)-2-Isopropyl-5-methylcyclohexyl** **(E)-3-(1-(2-(((1R,2S,5R)-2-isopropyl-5-methylcyclohexyl)oxy)-2-oxoethyl)-2-(4-methoxyphenyl)-6-(tosyloxy)-2H-isoindol-4-yl)acrylate (6y)**,  $^1\text{H NMR}$  (400 MHz,  $\text{CDCl}_3$ )  $\delta$  7.77-7.75 (m, 2H), 7.70 (d,  $J = 16.0$  Hz, 1H), 7.43 (s, 1H), 7.34-7.30 (m, 5H), 7.00 (d,  $J = 2.0$  Hz, 2H), 6.67 (d,  $J = 1.6$  Hz, 1H), 6.35 (d,  $J = 16.0$  Hz, 1H), 4.85-4.79 (m, 1H), 4.62-4.45 (m, 1H), 3.87 (s, 3H), 3.78 (s, 2H), 2.45 (s, 3H), 1.93-1.91 (m, 1H), 1.90-1.88 (m, 1H), 1.87-1.85 (m, 1H), 1.85-1.83 (m, 1H), 1.71-1.70 (m, 2H), 1.68-1.67 (m, 2H), 1.64-1.63 (m, 2H), 1.62-1.60 (m, 2H), 1.57-1.55 (m, 1H), 1.53-1.50 (m, 2H), 1.48-1.46 (m, 1H), 1.44-1.40 (m, 2H), 0.91-0.87 (m, 9H), 0.78 (d,  $J = 1.2$  Hz, 3H), 0.77 (d,  $J = 1.2$  Hz, 3H), 0.61 (d,  $J = 7.2$  Hz, 3H).  $^{13}\text{C NMR}$  (100 MHz,  $\text{CDCl}_3$ )  $\delta$  169.3, 166.7, 159.8, 145.2, 143.7, 142.6, 132.7, 131.8, 130.1, 130.0, 129.7, 129.0, 128.6, 127.8, 127.8, 123.3, 120.8, 119.8,

119.5, 118.1, 114.4, 114.3, 112.9, 75.2, 74.3, 74.2, 55.5, 47.2, 47.0, 46.9, 41.0, 40.8, 40.6, 34.3, 34.1, 31.9, 31.4, 31.3, 31.1, 29.7, 29.3, 26.3, 26.2, 26.1, 23.5, 23.4, 23.2, 22.6, 22.0 (2C), 21.9, 21.7, 20.8, 20.7, 16.4, 16.3, 16.1, 14.1. HRMS (ESI-TOF)  $m/z$ :  $[M + H]^+$  Calcd for  $C_{47}H_{60}NO_8S$ : 798.4118, Found: 798.4125.

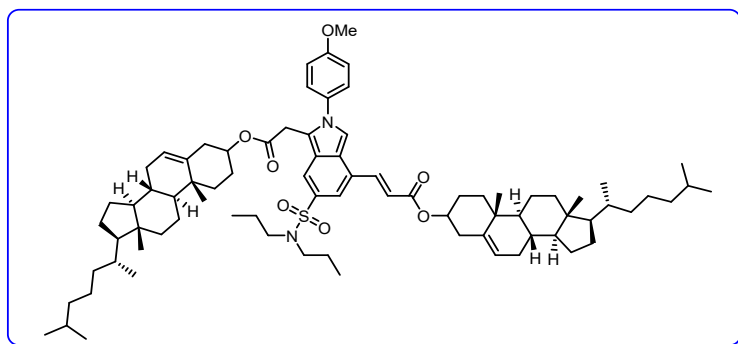

**(8*S*,9*S*,10*R*,13*R*,14*S*,17*R*)-10,13-Dimethyl-17-((*R*)-6-methylheptan-2-yl)-2,3,4,7,8,9,10,11,12,13,14,15,16,17-tetradecahydro-1*H*-cyclopenta[*a*]phenanthren-3-yl** (*E*)-3-(1-(2-(((8*S*,9*S*,10*R*,13*R*,14*S*,17*R*)-10,13-dimethyl-17-((*R*)-6-methylheptan-2-yl)-2,3,4,7,8,9,10,11,12,13,14,15,16,17-tetradecahydro-1*H*-cyclopenta[*a*]phenanthren-3-yl)oxy)-2-oxoethyl)-6-(*N,N*-dipropylsulfamoyl)-2-(4-methoxyphenyl)-2*H*-isoindol-4-yl)acrylate (**6z**),  $^1H$  NMR (400 MHz,  $CDCl_3$ )  $\delta$  8.21 (s, 1H), 7.88 (d,  $J = 16.0$  Hz, 1H), 7.52 (s, 1H), 7.46 (s, 1H), 7.37 (d,  $J = 8.8$  Hz, 1H), 7.02 (d,  $J = 8.8$  Hz, 2H), 6.53 (d,  $J = 16.0$  Hz, 1H), 5.40 (d,  $J = 3.6$  Hz, 1H), 5.33 (d,  $J = 4.0$  Hz, 1H), 4.78-4.73 (m, 1H), 4.59-4.51 (m, 1H), 3.90 (s, 2H), 3.89 (s, 3H), 3.13 (t,  $J = 7.6$  Hz, 4H), 2.41 (d,  $J = 7.6$  Hz, 2H), 2.23 (d,  $J = 6.8$  Hz, 2H), 2.00-1.92 (m, 8H), 1.88-1.80 (m, 6H), 1.64-1.54 (m, 8H), 1.51-1.44 (m, 12H), 1.18-1.09 (m, 16H), 1.06 (s, 3), 1.00 (s, 3H), 0.92-0.90 (m, 6H), 0.89 (s, 3H), 0.87-0.86 (m, 9H), 0.85 (t,  $J = 1.6$  Hz, 6H), 0.67 (d,  $J = 6.0$  Hz, 6H).  $^{13}C$  NMR (100 MHz,  $CDCl_3$ )  $\delta$  169.0, 166.5, 160.1, 143.0, 139.6, 139.3, 132.1, 131.5, 127.8, 127.5, 122.9, 122.7, 122.2, 120.9, 120.8, 120.2, 114.5, 75.2, 74.2, 56.7, 56.1, 55.6, 50.1, 50.0, 49.9, 42.3, 39.7, 39.5, 38.2, 37.9, 37.0, 36.8, 36.6, 36.5, 36.2, 35.8, 31.8, 31.8, 31.3, 29.7, 28.2, 28.0, 27.9, 27.6, 24.3, 23.8, 22.8, 22.5, 22.2, 21.0, 19.3, 19.3, 18.7, 11.8, 11.3. HRMS (ESI-TOF)  $m/z$ :  $[M + H]^+$  Calcd for  $C_{80}H_{119}N_2O_7S$ : 1251.8816, Found: 1251.8820.

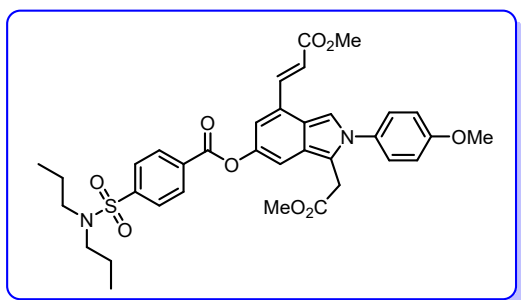

**(E)-3-(2-Methoxy-2-oxoethyl)-7-(3-methoxy-3-oxoprop-1-en-1-yl)-2-(4-methoxyphenyl)-2H-isoindol-5-yl 4-(N,N-dipropylsulfamoyl)benzoate (6za), <sup>1</sup>H NMR (400 MHz, CDCl<sub>3</sub>) δ 8.35 (d, *J* = 8.4 Hz, 2H), 7.96 (d, *J* = 8.4 Hz, 2H), 7.90 (d, *J* = 16.0 Hz, 1H), 7.51 (s, 1H), 7.46 (d, *J* = 1.2 Hz, 1H), 7.36 (d, *J* = 8.4 Hz, 2H), 7.09 (d, *J* = 1.6 Hz, 1H), 7.03 (dd, *J* = 2.4 Hz, 6.8 Hz, 2H), 6.55 (d, *J* = 8.0 Hz, 1H), 3.90 (s, 3H), 3.87 (s, 2H), 3.81 (s, 3H), 3.15 (t, *J* = 7.6 Hz, 4H), 1.61-1.55 (m, 4H), 0.90 (t, *J* = 7.2 Hz, 6H). <sup>13</sup>C NMR (100 MHz, CDCl<sub>3</sub>) δ 170.5, 167.6, 164.3, 159.9, 144.8, 144.8, 143.3, 133.0, 131.8, 130.8, 127.9, 127.9, 127.2, 123.4, 121.0, 119.5, 118.9, 117.2, 114.4, 113.2, 112.6, 55.6, 52.3, 51.7, 49.9, 33.9, 30.8, 25.6, 24.9, 21.9, 11.2. HRMS (ESI-TOF) *m/z*: [M + H]<sup>+</sup> Calcd for C<sub>35</sub>H<sub>39</sub>N<sub>2</sub>O<sub>9</sub>S: 663.2376, Found: 663.2378.**

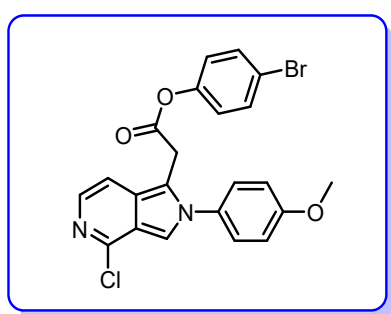

**4-Bromophenyl 2-(4-chloro-2-(4-methoxyphenyl)-2H-pyrrolo[3,4-c]pyridin-1-yl)acetate (6zb), <sup>1</sup>H NMR (400 MHz, CDCl<sub>3</sub>) δ 7.77 (d, *J* = 6.0 Hz, 1H), 7.50 (s, 1H), 7.45 (dd, *J* = 2.0 Hz, 6.8 Hz, 2H), 7.37 (dd, *J* = 2.0 Hz, 6.4 Hz, 2H), 7.33 (d, *J* = 6.0 Hz, 1H), 7.04 (dd, *J* = 2.0 Hz, 6.8 Hz, 2H), 6.82 (dd, *J* = 2.0 Hz, 6.8 Hz, 2H), 4.07 (s, 2H), 3.90 (s, 3H). <sup>13</sup>C NMR (100 MHz, CDCl<sub>3</sub>) δ 167.9, 160.3, 149.4, 146.0, 136.4, 132.5,**

131.1, 127.9, 125.4, 123.0, 119.9, 119.2, 115.9, 114.7, 111.7, 55.7, 31.2. HRMS (ESI-TOF)  $m/z$ :  $[M + H]^+$  Calcd for  $C_{22}H_{17}BrClN_2O_3$ : 471.0111, Found: 471.0111.

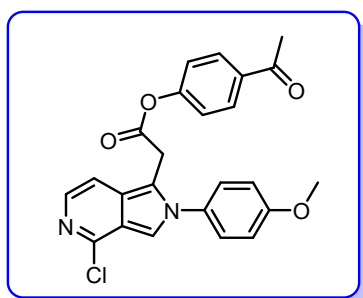

**4-Acetylphenyl 2-(4-chloro-2-(4-methoxyphenyl)-2H-pyrrolo[3,4-c]pyridin-1-yl)acetate (6zc)**,  $^1H$  NMR (400 MHz,  $CDCl_3$ )  $\delta$  7.94 (d,  $J = 8.4$  Hz, 2H), 7.78 (d,  $J = 6.0$  Hz, 1H), 7.51 (s, 1H), 7.38 (d,  $J = 8.8$  Hz, 2H), 7.34 (d,  $J = 6.4$  Hz, 1H), 7.04 (t,  $J = 8.0$  Hz, 4H), 4.10 (s, 2H), 3.90 (s, 3H), 2.57 (s, 3H).  $^{13}C$  NMR (100 MHz,  $CDCl_3$ )  $\delta$  196.7, 167.7, 160.3, 154.0, 146.0, 136.4, 134.9, 131.0, 129.9, 127.9, 125.4, 121.4, 119.8, 116.0, 115.8, 114.7, 111.7, 55.7, 31.2, 26.6. HRMS (ESI-TOF)  $m/z$ :  $[M + H]^+$  Calcd for  $C_{24}H_{20}ClN_2O_4$ : 432.1112, Found: 432.1115.

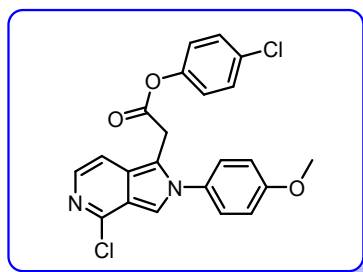

**4-Chlorophenyl 2-(4-chloro-2-(4-methoxyphenyl)-2H-pyrrolo[3,4-c]pyridin-1-yl)acetate (6zd)**,  $^1H$  NMR (400 MHz,  $CDCl_3$ )  $\delta$  7.77 (d,  $J = 6.4$  Hz, 1H), 7.51 (s, 1H), 7.37 (d,  $J = 8.4$  Hz, 2H), 7.33 (d,  $J = 6.0$  Hz, 1H), 7.30 (d,  $J = 8.8$  Hz, 2H), 7.05 (d,  $J = 8.4$  Hz, 2H), 6.87 (d,  $J = 8.4$  Hz, 2H), 4.07 (s, 2H), 3.90 (s, 3H).  $^{13}C$  NMR (100 MHz,  $CDCl_3$ )  $\delta$  168.0, 160.3, 148.8, 146.0, 136.2, 131.5, 131.0, 129.5, 127.9, 125.4, 122.6, 119.8, 116.8, 116.0, 116.0, 114.6, 111.8, 55.7, 31.1. HRMS (ESI-TOF)  $m/z$ :  $[M + H]^+$  Calcd for  $C_{22}H_{17}Cl_2N_2O_3$ : 427.0616, Found: 427.0620.

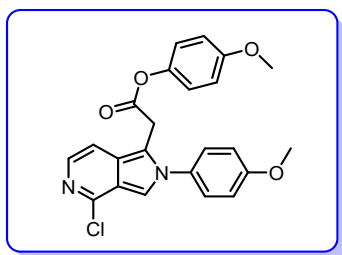

**4-Methoxyphenyl 2-(4-chloro-2-(4-methoxyphenyl)-2H-pyrrolo[3,4-c]pyridin-1-yl)acetate (6ze)**,  $^1\text{H NMR}$  (400 MHz,  $\text{CDCl}_3$ )  $\delta$  7.77 (d,  $J = 6.0$  Hz, 1H), 7.49 (s, 1H), 7.38 (dd,  $J = 2.4$  Hz, 6.8 Hz, 2H), 7.35 (d,  $J = 6.0$  Hz, 1H), 7.04 (dd,  $J = 2.0$  Hz, 6.8 Hz, 2H), 6.84 (s, 4H), 4.05 (s, 2H), 3.90 (s, 3H), 3.77 (s, 3H).  $^{13}\text{C NMR}$  (100 MHz,  $\text{CDCl}_3$ )  $\delta$  168.6, 160.2, 157.4, 145.9, 143.9, 136.3, 131.1, 127.9, 125.3, 122.0, 119.8, 116.4, 115.7, 114.6, 114.4, 111.9, 55.7, 55.6, 31.2. HRMS (ESI-TOF)  $m/z$ :  $[\text{M} + \text{H}]^+$  Calcd for  $\text{C}_{23}\text{H}_{20}\text{ClN}_2\text{O}_4$ : 423.1112, Found: 423.1115.

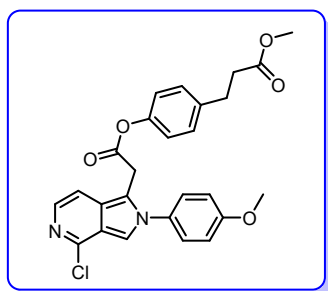

**Methyl 3-(4-(2-(4-chloro-2-(4-methoxyphenyl)-2H-pyrrolo[3,4-c]pyridin-1-yl)acetoxymethyl)phenyl)propanoate (6zf)**,  $^1\text{H NMR}$  (400 MHz,  $\text{CDCl}_3$ )  $\delta$  7.77 (d,  $J = 5.6$  Hz, 1H), 7.50 (s, 1H), 7.38 (dd,  $J = 2.0$  Hz, 6.8 Hz, 2H), 7.35 (d,  $J = 6.0$  Hz, 1H), 7.16 (d,  $J = 8.8$  Hz, 2H), 7.04 (dd,  $J = 2.0$  Hz, 6.8 Hz, 2H), 6.84 (dd,  $J = 2.0$  Hz, 6.8 Hz, 2H), 4.06 (s, 2H), 3.90 (s, 3H), 3.65 (s, 3H), 3.92 (t,  $J = 7.6$  Hz, 2H), 2.60 (t,  $J = 8.0$  Hz, 2H).  $^{13}\text{C NMR}$  (100 MHz,  $\text{CDCl}_3$ )  $\delta$  173.1, 168.3, 160.2, 148.8, 145.9, 138.4, 136.2, 131.1, 129.3, 127.9, 125.3, 121.2, 116.3, 115.8, 114.6, 111.9, 55.7, 51.7, 35.5, 31.2, 30.2. HRMS (ESI-TOF)  $m/z$ :  $[\text{M} + \text{H}]^+$  Calcd for  $\text{C}_{26}\text{H}_{24}\text{ClN}_2\text{O}_5$ : 479.1374, Found: 479.1377.

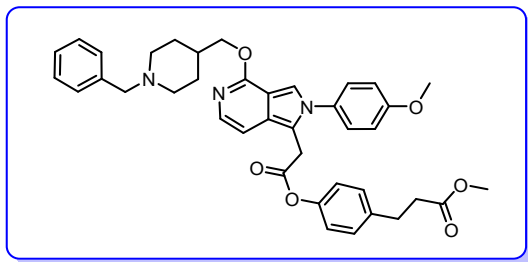

**Methyl 3-(4-(2-(4-((1-benzylpiperidin-4-yl)methoxy)-2-(4-methoxyphenyl)-2H-pyrrolo[3,4-c]pyridin-1-yl)acetoxymethyl)phenyl)propanoate (6zf-I), <sup>1</sup>H NMR (400 MHz, CDCl<sub>3</sub>) δ 7.76 (d, *J* = 6.0 Hz, 1H), 7.49 (s, 1H), 7.38 (dd, *J* = 2.0 Hz, 6.8 Hz, 2H), 7.34 (dd, *J* = 0.8 Hz, 6.4 Hz, 1H), 7.31 (d, *J* = 4.4 Hz, 4H), 7.25-7.23 (m, 1H), 7.16 (d, *J* = 8.4 Hz, 2H), 7.04 (dd, *J* = 2.4 Hz, 6.8 Hz, 2H), 6.84 (dd, *J* = 2.0 Hz, 6.8 Hz, 2H), 4.05 (s, 2H), 3.89 (s, 2H), 3.65 (s, 3H), 3.51 (s, 3H), 3.48 (d, *J* = 6.4 Hz, 2H), 2.94-2.89 (m, 4H), 2.95 (t, *J* = 8.0 Hz, 2H), 2.01-1.94 (m, 2H), 1.73-1.68 (m, 2H), 1.34-1.30 (m, 2H), 1.29-1.27 (m, 1H). <sup>13</sup>C NMR (100 MHz, CDCl<sub>3</sub>) δ 173.1, 168.3, 160.2, 148.8, 145.9, 138.4, 138.0, 136.2, 131.1, 129.3, 129.3, 128.1, 127.9, 127.0, 125.3, 121.1, 119.8, 116.3, 115.7, 114.6, 111.9, 67.8, 63.3, 55.6, 53.3, 51.6, 38.4, 35.5, 31.2, 30.2, 28.6. HRMS (ESI-TOF) *m/z*: [M + H]<sup>+</sup> Calcd for C<sub>39</sub>H<sub>42</sub>N<sub>3</sub>O<sub>6</sub>: 684.3074, Found: 684.3077.**

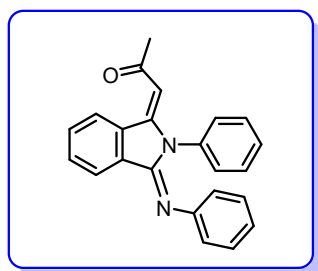

**1-((1E,3Z)-2-Phenyl-3-(phenylimino)isoindolin-1-ylidene)propan-2-one (8a), <sup>1</sup>H NMR (400 MHz, CDCl<sub>3</sub>) δ 9.31 (d, *J* = 8.0 Hz, 1H), 7.59-7.52 (m, 3H), 7.47 (t, *J* = 7.2 Hz, 1H), 7.39 (d, *J* = 7.6 Hz, 2H), 7.30 (t, *J* = 8.0 Hz, 2H), 7.24 (t, *J* = 7.6 Hz, 1H), 7.09 (t, *J* = 7.2 Hz, 1H), 6.89 (d, *J* = 7.6 Hz, 2H), 6.74 (d, *J* = 8.0 Hz, 1H), 5.62 (s, 1H), 2.18 (s, 3H). <sup>13</sup>C NMR (100 MHz, CDCl<sub>3</sub>) δ 196.0, 153.1, 151.1, 149.5, 135.8, 134.6, 131.7, 131.0, 129.7 (2C), 129.6 (2C), 129.1 (2C), 128.7, 128.0, 127.8, 125.2, 123.3,**



120.1 (2C), 103.3, 32.4. HRMS (ESI-TOF)  $m/z$ :  $[M + H]^+$  Calcd for  $C_{23}H_{19}N_2O$ : 339.1419, Found: 33.1423.

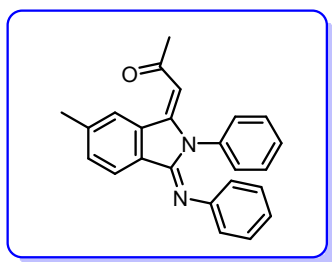

**1-((1E,3Z)-6-Methyl-2-phenyl-3-(phenylimino)isoindolin-1-ylidene)propan-2-one (8b)**,  $^1H$  NMR (400 MHz,  $CDCl_3$ )  $\delta$  9.15 (s, 1H), 7.58 (t,  $J = 7.6$  Hz, 2H), 7.48 (t,  $J = 7.2$  Hz, 1H), 7.39 (d,  $J = 7.6$  Hz, 2H), 7.30 (t,  $J = 7.6$  Hz, 2H), 7.12-7.06 (m, 2H), 6.89 (d,  $J = 8.0$  Hz, 2H), 6.62 (d,  $J = 8.0$  Hz, 1H), 5.61 (s, 1H), 2.45 (s, 3H), 2.20 (s, 3H).  $^{13}C$  NMR (100 MHz,  $CDCl_3$ )  $\delta$  196.1, 153.3, 151.9, 149.7, 142.5, 135.9, 134.9, 131.8, 129.7 (2C), 129.6 (2C), 129.1 (2C), 128.7, 128.3, 125.4, 125.0, 123.3, 120.3 (2C), 103.1, 32.4, 22.0. HRMS (ESI-TOF)  $m/z$ :  $[M + H]^+$  Calcd for  $C_{24}H_{21}N_2O$ : 353.1654, Found: 353.1655.

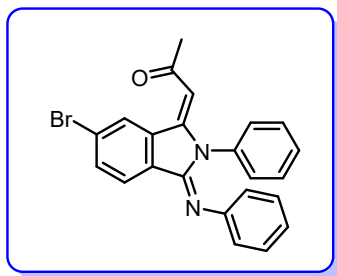

**1-((1E,3Z)-6-Bromo-2-phenyl-3-(phenylimino)isoindolin-1-ylidene)propan-2-one (8c)**,  $^1H$  NMR (400 MHz,  $CDCl_3$ )  $\delta$  9.56 (s, 1H), 7.59 (t,  $J = 7.2$  Hz, 2H), 7.50 (t,  $J = 6.8$  Hz, 1H), 7.38 (d,  $J = 6.0$  Hz, 3H), 7.31 (t,  $J = 7.2$  Hz, 2H), 7.11 (t,  $J = 7.2$  Hz, 1H), 6.87 (d,  $J = 7.2$  Hz, 2H), 6.58 (d,  $J = 8.4$  Hz, 1H), 5.63 (s, 1H).  $^{13}C$  NMR (100 MHz,  $CDCl_3$ )  $\delta$  196.1, 152.4, 150.3, 149.2, 136.3, 135.5, 134.1, 131.1, 129.8 (2C), 129.5 (2C), 129.2 (2C), 129.0, 126.5, 126.3, 123.6, 120.1 (2C), 104.0, 32.4. HRMS (ESI-TOF)  $m/z$ :  $[M + H]^+$  Calcd for  $C_{23}H_{18}BrN_2O$ : 417.0603, Found: 417.0606.

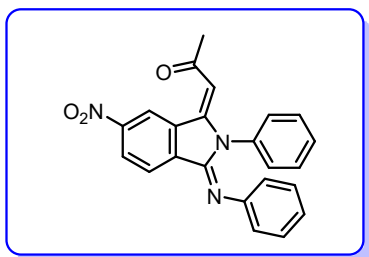

**1-((1E, 3Z)-6-Nitro-2-phenyl-3-(phenylimino)isoindolin-1-ylidene)propan-2-one (8d)**,  $^1\text{H NMR}$  (400 MHz,  $\text{CDCl}_3$ )  $\delta$  10.26 (s, 1H), 8.11 (d,  $J = 7.6$  Hz, 1H), 7.62 (t,  $J = 7.6$  Hz, 2H), 7.53 (t,  $J = 7.2$  Hz, 1H), 7.40 (d,  $J = 7.6$  Hz, 2H), 7.34 (t,  $J = 7.6$  Hz, 2H), 7.17-7.14 (m, 1H), 6.88 (d,  $J = 7.6$  Hz, 3H), 5.73 (s, 1H), 2.24 (s, 3H).  $^{13}\text{C NMR}$  (100 MHz,  $\text{CDCl}_3$ )  $\delta$  196.2, 151.2, 149.8, 149.4, 148.8, 135.8, 135.2, 132.1, 130.0 (2C), 129.4 (2C), 129.3 (2C), 125.9, 125.4, 124.1, 123.7, 119.9 (2C), 116.5, 104.9, 32.4. HRMS (ESI-TOF)  $m/z$ :  $[\text{M} + \text{H}]^+$  Calcd for  $\text{C}_{23}\text{H}_{18}\text{N}_3\text{O}_3$ : 384.1348, Found: 384.1353.

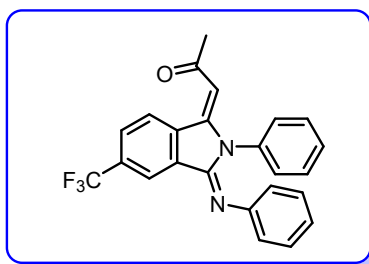

**1-((1E,3Z)-2-Phenyl-3-(phenylimino)-5-(trifluoromethyl)isoindolin-1-ylidene)propan-2-one (8e)**,  $^1\text{H NMR}$  (400 MHz,  $\text{CDCl}_3$ )  $\delta$  9.45 (d,  $J = 8.4$  Hz, 1H), 7.78 (d,  $J = 8.4$  Hz, 1H), 7.61 (t,  $J = 7.6$  Hz, 2H), 7.51 (t,  $J = 7.2$  Hz, 1H), 7.40 (d,  $J = 7.2$  Hz, 2H), 7.34 (t,  $J = 7.6$  Hz, 2H), 7.16 (t,  $J = 7.2$  Hz, 1H), 6.90 (d,  $J = 8.4$  Hz, 3H), 5.70 (s, 1H), 2.22 (s, 3H).  $^{13}\text{C NMR}$  (100 MHz,  $\text{CDCl}_3$ )  $\delta$  196.2, 152.1, 150.0, 148.9, 137.4, 135.4, 132.5 (d,  $J = 32.0$  Hz, 1C), 129.9 (2C), 129.4 (2C), 129.3 (2C), 129.1, 128.7, 128.5 (q,  $J = 4.0$  Hz, 1C), 128.1, 125.8 (d,  $J = 2.0$  Hz, 1C), 123.2 (d,  $J = 271.0$  Hz, 1C), 122.2 (q,  $J = 4.0$  Hz, 1C), 104.7, 32.5.  $^{19}\text{F NMR}$  (300 MHz,  $\text{CDCl}_3$ )  $\delta$  -63.2 (3F). HRMS (ESI-TOF)  $m/z$ :  $[\text{M} + \text{H}]^+$  Calcd for  $\text{C}_{24}\text{H}_{18}\text{F}_3\text{N}_2\text{O}$ : 407.1371, Found: 407.1373.

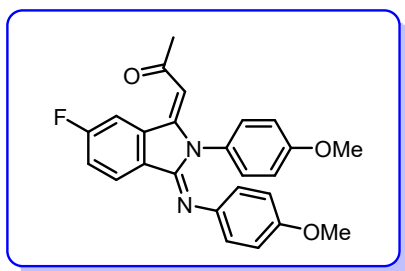

**1-((1E,3Z)-6-Fluoro-2-(4-methoxyphenyl)-3-((4-methoxyphenyl)imino)isoindolin-1-ylidene)propan-2-one (8f)**,  $^1\text{H NMR}$  (400 MHz,  $\text{CDCl}_3$ )  $\delta$  9.14 (dd,  $J = 2.4$  Hz, 10.4 Hz, 1H), 5.62 (s, 1H), 7.29-7.26 (m, 2H), 7.08 (dd,  $J = 3.2$  Hz, 10.0 Hz, 2H), 6.97-6.94 (m, 1H), 6.87-6.85 (m, 2H), 6.82-6.75 (m, 3H), 5.62 (s, 1H), 3.88 (s, 3H), 3.82 (s, 3H), 2.20 (s, 3H).  $^{13}\text{C NMR}$  (100 MHz,  $\text{CDCl}_3$ )  $\delta$  196.1, 165.7, 163.2, 159.6, 156.1, 153.1, 151.1, 142.6, 136.9, 130.5 (2C), 128.0, 121.2 (2C), 115.1 (2C), 115.4 (2C), 103.6, 55.5 (2C), 32.4.  $^{19}\text{F NMR}$  (300 MHz,  $\text{CDCl}_3$ )  $\delta$  -105.9. HRMS (ESI-TOF)  $m/z$ :  $[\text{M} + \text{H}]^+$  Calcd for  $\text{C}_{25}\text{H}_{22}\text{FN}_2\text{O}_3$ : 417.1614, Found: 417.1616.

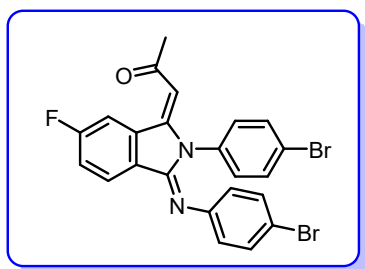

**1-((1E,3Z)-2-(4-Bromophenyl)-3-((4-bromophenyl)imino)-6-fluoro-isoindolin-1-ylidene)propan-2-one (8g)**,  $^1\text{H NMR}$  (400 MHz,  $\text{CDCl}_3$ )  $\delta$  9.11 (dd,  $J = 2.4$  Hz, 10.4 Hz, 1H), 7.71 (d,  $J = 8.4$  Hz, 2H), 7.43 (d,  $J = 8.4$  Hz, 2H), 7.26 (d,  $J = 8.4$  Hz, 2H), 7.04-6.99 (m, 1H), 6.81 (dd,  $J = 5.2$  Hz, 8.8 Hz, 1H), 6.77 (d,  $J = 8.4$  Hz, 2H), 5.64 (s, 1H), 2.22 (s, 3H).  $^{13}\text{C NMR}$  (100 MHz,  $\text{CDCl}_3$ )  $\delta$  196.0, 166.0, 163.5, 152.2, 149.9, 148.0, 136.8 (d,  $J = 12.0$  Hz, 1C), 134.4, 133.1 (2C), 132.3 (2C), 131.1 (2C), 126.9 (d,  $J = 9.0$  Hz, 1C), 123.4 (d,  $J = 44.0$  Hz, 1C), 122.0 (2C), 118.5 (d,  $J = 23.0$  Hz, 1C), 116.5, 115.6 (d,  $J = 27.0$  Hz, 1C), 104.4, 32.4.  $^{19}\text{F NMR}$  (300 MHz,  $\text{CDCl}_3$ )  $\delta$  104.7. HRMS (ESI-TOF)  $m/z$ :  $[\text{M} + \text{H}]^+$  Calcd for  $\text{C}_{23}\text{H}_{16}\text{FBr}_2\text{N}_2\text{O}$ : 514.9593, Found: 514.9596.

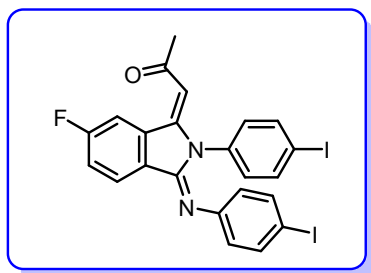

**1-((1E,3Z)-6-Fluoro-2-(4-iodophenyl)-3-((4-iodophenyl)imino)isoindolin-1-ylidene)propan-2-one (8h)**,  $^1\text{H NMR}$  (400 MHz,  $\text{CDCl}_3$ )  $\delta$  9.11 (dd,  $J = 2.0$  Hz, 10.4 Hz, 1H), 7.91 (d,  $J = 8.4$  Hz, 2H), 7.62 (d,  $J = 8.4$  Hz, 2H), 7.12 (d,  $J = 8.0$  Hz, 2H), 7.04-7.00 (m, 1H), 6.82 (dd,  $J = 4.8$  Hz, 8.4 Hz, 1H), 6.65 (d,  $J = 8.4$  Hz, 2H), 5.65 (s, 1H), 2.22 (s, 3H).  $^{13}\text{C NMR}$  (100 MHz,  $\text{CDCl}_3$ )  $\delta$  196.1, 152.1, 149.9, 148.7, 139.1 (2C), 138.3 (2C), 138.2, 136.9 (d,  $J = 12.0$  Hz, 1C), 135.1, 131.4 (2C), 126.9 (d,  $J = 9.0$  Hz, 1C), 123.6, 122.5 (2C), 118.6 (d,  $J = 23.0$  Hz, 1C), 115.6 (d,  $J = 27.0$  Hz, 1C), 104.5, 95.0, 86.9, 32.5.  $^{19}\text{F NMR}$  (300 MHz,  $\text{CDCl}_3$ )  $\delta$  -104.7. HRMS (ESI-TOF)  $m/z$ :  $[\text{M} + \text{H}]^+$  Calcd for  $\text{C}_{23}\text{H}_{16}\text{F}_2\text{N}_2\text{O}$ : 608.9336, Found: 608.9339.

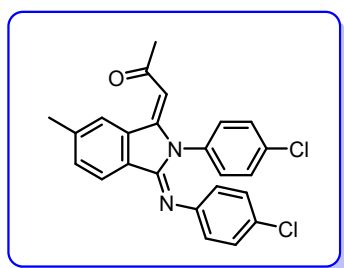

**1-((1E,3Z)-2-(4-Chlorophenyl)-3-((4-chlorophenyl)imino)-6-methyl-isoindolin-1-ylidene)propan-2-one (8i)**,  $^1\text{H NMR}$  (400 MHz,  $\text{CDCl}_3$ )  $\delta$  9.11 (s, 1H), 7.54 (d,  $J = 8.0$  Hz, 2H), 7.31 (d,  $J = 8.4$  Hz, 2H), 7.27 (d,  $J = 8.8$  Hz, 2H), 7.12 (d,  $J = 8.0$  Hz, 1H), 6.82 (d,  $J = 8.0$  Hz, 2H), 6.70 (d,  $J = 8.0$  Hz, 1H), 5.59 (s, 1H), 2.46 (s, 3H), 2.21 (s, 3H).  $^{13}\text{C NMR}$  (100 MHz,  $\text{CDCl}_3$ )  $\delta$  196.1, 153.5, 151.3, 148.0, 143.0, 134.8, 134.2, 132.1, 131.0 (2C), 130.6, 130.1 (2C), 129.2 (2C), 128.7, 128.5, 125.1, 124.9, 121.7 (2C), 103.7, 32.4, 22.0. HRMS (ESI-TOF)  $m/z$ :  $[\text{M} + \text{H}]^+$  Calcd for  $\text{C}_{24}\text{H}_{19}\text{Cl}_2\text{N}_2\text{O}$ : 421.0874, Found: 421.0879.

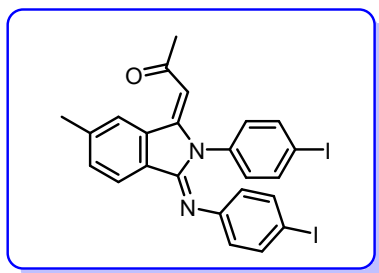

**1-((1E,3Z)-2-(4-Iodophenyl)-3-((4-iodophenyl)imino)-6-methyl-isoindolin-1-ylidene)propan-2-one (8j)**,  $^1\text{H NMR}$  (400 MHz,  $\text{CDCl}_3$ )  $\delta$  9.11 (s, 1H), 7.90 (d,  $J = 8.4$  Hz, 2H), 7.60 (d,  $J = 8.4$  Hz, 2H), 7.14-7.11 (m, 3H), 6.72 (d,  $J = 8.0$  Hz, 1H), 6.66 (d,  $J = 8.4$  Hz, 2H), 5.60 (s, 1H), 2.46 (s, 3H), 2.22 (s, 3H).  $^{13}\text{C NMR}$  (100 MHz,  $\text{CDCl}_3$ )  $\delta$  196.1, 153.2, 151.1, 149.1, 143.0, 139.0 (2C), 138.1 (2C), 135.5, 134.8, 132.1, 131.5 (2C), 128.5, 125.0, 125.0, 122.7 (2C), 103.7, 94.7, 86.7, 32.4, 22.1. HRMS (ESI-TOF)  $m/z$ :  $[\text{M} + \text{H}]^+$  Calcd for  $\text{C}_{24}\text{H}_{19}\text{I}_2\text{N}_2\text{O}$ : 604.9587, Found: 604.9584.

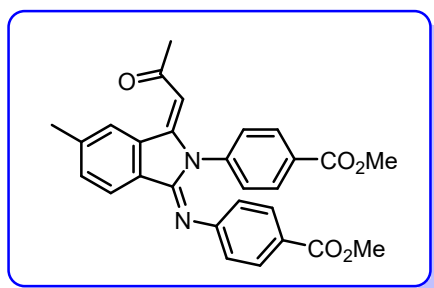

**Methyl-4-(((1Z,3E)-2-(4-(methoxycarbonyl)phenyl)-5-methyl-3-(2-oxopropylidene)isoindolin-1-ylidene)amino)benzoate (8k)**,  $^1\text{H NMR}$  (400 MHz,  $\text{CDCl}_3$ )  $\delta$  9.10 (s, 1H), 8.24 (d,  $J = 6.8$  Hz, 2H), 8.00 (d,  $J = 7.6$  Hz, 2H), 7.48 (d,  $J = 7.6$  Hz, 2H), 7.08 (d,  $J = 7.2$  Hz, 1H), 6.93 (d,  $J = 7.2$  Hz, 2H), 6.66 (d,  $J = 6.4$  Hz, 1H), 5.62 (s, 1H), 3.95 (s, 3H), 3.91 (s, 3H), 2.45 (s, 3H), 2.20 (s, 3H).  $^{13}\text{C NMR}$  (100 MHz,  $\text{CDCl}_3$ )  $\delta$  196.1, 167.0, 166.2, 153.9, 150.9, 143.2, 139.9, 134.7, 132.1, 131.0 (2C), 131.0 (2C), 130.5, 130.2, 129.7 (2C), 128.5, 127.6, 125.1, 124.9, 120.3 (2C), 104.1, 52.4, 51.9, 32.4, 22.1. HRMS (ESI-TOF)  $m/z$ :  $[\text{M} + \text{H}]^+$  Calcd for  $\text{C}_{28}\text{H}_{25}\text{N}_2\text{O}_5$ : 469.1763, Found: 469.1768.

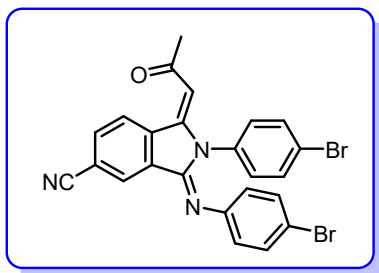

**(1E, 3Z)-2-(4-Bromophenyl)-3-((4-bromophenyl)imino)-1-(2-oxopropylidene)isoindoline-5-carbonitrile (8l)**,  $^1\text{H NMR}$  (400 MHz,  $\text{CDCl}_3$ )  $\delta$  9.45 (d,  $J = 8.0$  Hz, 1H), 7.84 (d,  $J = 8.4$  Hz, 1H), 7.73 (d,  $J = 8.4$  Hz, 2H), 7.47 (d,  $J = 8.4$  Hz, 2H), 7.25 (d,  $J = 8.0$  Hz, 2H), 7.16 (s, 1H), 6.75 (d,  $J = 8.4$  Hz, 2H), 5.72 (s, 1H), 2.45 (s, 3H).  $^{13}\text{C NMR}$  (100 MHz,  $\text{CDCl}_3$ )  $\delta$  196.1, 151.0, 148.8, 147.1, 137.8, 135.5, 134.0, 133.3, 132.7, 132.1, 131.0 (2C), 129.1, 128.4, 127.9, 123.5, 121.6, 118.0, 117.6, 117.3, 114.6, 105.8, 32.6. HRMS (ESI-TOF)  $m/z$ :  $[\text{M} + \text{H}]^+$  Calcd for  $\text{C}_{24}\text{H}_{16}\text{Br}_2\text{N}_3\text{O}$ : 521.9640, Found: 541.9644.

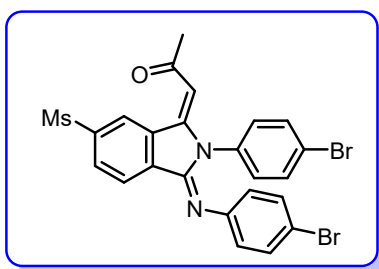

**1-((1E, 3Z)-2-(4-Bromophenyl)-3-((4-bromophenyl)imino)-6-(methylsulfonyl)isoindolin-1-ylidene)propan-2-one (8m)**,  $^1\text{H NMR}$  (400 MHz,  $\text{CDCl}_3$ )  $\delta$  9.93 (s, 1H), 7.91 (d,  $J = 8.0$  Hz, 1H), 7.73 (d,  $J = 8.4$  Hz, 2H), 7.45 (d,  $J = 8.4$  Hz, 2H), 7.26 (d,  $J = 8.4$  Hz, 2H), 7.03 (d,  $J = 8.4$  Hz, 1H), 6.77 (d,  $J = 8.4$  Hz, 2H), 5.72 (s, 1H), 3.12 (s, 3H), 2.25 (s, 3H).  $^{13}\text{C NMR}$  (100 MHz,  $\text{CDCl}_3$ )  $\delta$  196.1, 151.4, 149.0, 147.5, 143.9, 135.4, 134.0, 133.3, 132.5, 131.2, 131.0 (2C), 130.3, 129.6, 128.1, 127.5, 125.9, 123.4, 121.8, 117.0, 102.3, 44.0, 32.4. HRMS (ESI-TOF)  $m/z$ :  $[\text{M} + \text{H}]^+$  Calcd for  $\text{C}_{24}\text{H}_{19}\text{Br}_2\text{N}_2\text{O}_3\text{S}$ : 574.9463, Found: 574.9467.

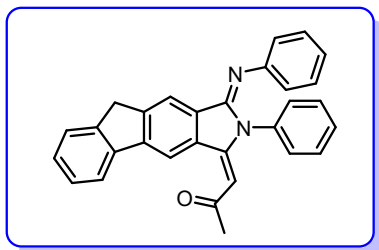

**(E)-1-((Z)-2-Phenyl-1-(phenylimino)-1,9-dihydroindeno[1,2-f]isoindol-3(2H)-ylidene)propan-2-one (8n)**,  $^1\text{H NMR}$  (400 MHz,  $\text{CDCl}_3$ )  $\delta$  9.82 (s, 1H), 8.03 (d,  $J = 7.2$  Hz, 1H), 7.60 (t,  $J = 7.6$  Hz, 2H), 7.51-7.48 (m, 2H), 7.42 (t,  $J = 7.6$  Hz, 3H), 7.36-7.32 (m, 3H), 7.14 (t,  $J = 7.2$  Hz, 1H), 6.94 (d,  $J = 7.6$  Hz, 2H), 6.87 (s, 1H), 5.65 (s, 1H), 3.75 (s, 2H), 2.24 (s, 3H).  $^{13}\text{C NMR}$  (100 MHz,  $\text{CDCl}_3$ )  $\delta$  196.2, 152.2, 149.7, 146.3, 145.5, 143.8, 140.7, 136.0, 134.1, 129.7 (2C), 129.7 (2C), 129.2 (2C), 128.7, 128.4, 127.9, 127.1, 126.4, 124.9, 123.3, 121.8, 121.2, 120.3 (2C), 119.5, 103.0, 37.2, 32.5. HRMS (ESI-TOF)  $m/z$ :  $[\text{M} + \text{H}]^+$  Calcd for  $\text{C}_{30}\text{H}_{23}\text{N}_2\text{O}$ : 427.1810, Found: 427.1817.

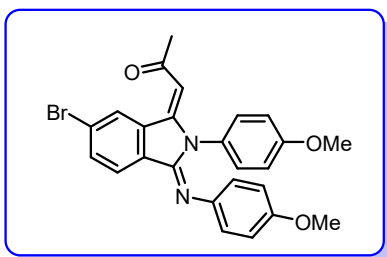

**1-((1E,3Z)-6-Bromo-2-(4-methoxyphenyl)-3-((4-methoxyphenyl)imino)isoindolin-1-ylidene)propan-2-one (8o)**,  $^1\text{H NMR}$  (400 MHz,  $\text{CDCl}_3$ )  $\delta$  9.56 (d,  $J = 1.6$  Hz, 1H), 7.40 (dd,  $J = 1.6$  Hz, 8.0 Hz, 1H), 7.27 (d,  $J = 8.8$  Hz, 2H), 7.08 (d,  $J = 8.8$  Hz, 2H), 6.86 (d,  $J = 8.8$  Hz, 2H), 6.79 (d,  $J = 8.8$  Hz, 2H), 6.65 (d,  $J = 8.4$  Hz, 1H), 5.62 (s, 1H), 3.87 (s, 3H), 3.82 (s, 3H), 2.20 (s, 3H).  $^{13}\text{C NMR}$  (100 MHz,  $\text{CDCl}_3$ )  $\delta$  196.1, 159.6, 156.1, 153.2, 150.8, 142.5, 136.2, 134.0, 131.0, 130.4 (2C), 127.9, 126.4, 126.3, 121.1 (2C), 115.1 (2C), 114.4 (2C), 103.7, 55.4 (2C), 32.4. HRMS (ESI-TOF)  $m/z$ :  $[\text{M} + \text{H}]^+$  Calcd for  $\text{C}_{25}\text{H}_{22}\text{BrN}_2\text{O}_3$ : 477.0814, Found: 477.0816.

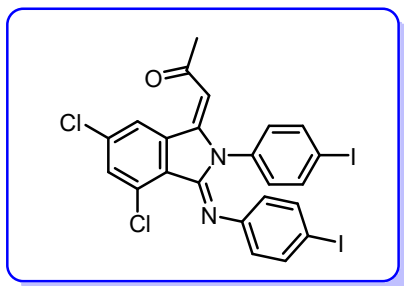

**1-((1E,3Z)-4,6-Dichloro-2-(4-iodophenyl)-3-((4-iodophenyl)imino)isoindolin-1-ylidene)propan-2-one (8p)**,  $^1\text{H NMR}$  (400 MHz,  $\text{CDCl}_3$ )  $\delta$  9.30 (s, 1H), 7.64 (s, 1H), 7.53 (d,  $J = 8.4$  Hz, 2H), 7.22 (d,  $J = 8.4$  Hz, 2H), 6.66 (d,  $J = 8.4$  Hz, 2H), 6.20 (d,  $J = 8.0$  Hz, 2H), 5.42 (s, 1H), 2.17 (s, 3H).  $^{13}\text{C NMR}$  (100 MHz,  $\text{CDCl}_3$ )  $\delta$  196.1, 149.8, 146.6, 139.1, 138.7 (2C), 138.2, 136.9 (2C), 135.6, 133.8, 131.6 (2C), 131.3, 131.3, 126.3, 122.4, 122.1 (2C), 105.1, 94.7, 85.1, 32.6. HRMS (ESI-TOF)  $m/z$ :  $[\text{M} + \text{H}]^+$  Calcd for  $\text{C}_{23}\text{H}_{15}\text{Cl}_2\text{I}_2\text{N}_2\text{O}$ : 658.8651, Found: 658.8658.

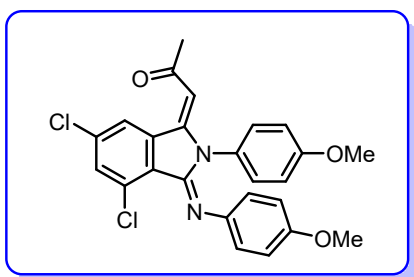

**1-((1E,3Z)-4,6-Dichloro-2-(4-methoxyphenyl)-3-((4-methoxyphenyl)imino)isoindolin-1-ylidene)propan-2-one (8q)**,  $^1\text{H NMR}$  (400 MHz,  $\text{CDCl}_3$ )  $\delta$  9.34 (s, 1H), 7.63 (s, 1H), 6.82 (d,  $J = 8.8$  Hz, 2H), 6.63 (d,  $J = 8.4$  Hz, 2H), 6.44 (d,  $J = 8.8$  Hz, 2H), 6.37 (d,  $J = 8.8$  Hz, 2H), 5.45 (s, 1H), 3.75 (s, 3H), 3.66 (s, 3H), 2.15 (s, 3H).  $^{13}\text{C NMR}$  (100 MHz,  $\text{CDCl}_3$ )  $\delta$  196.3, 159.2, 154.8, 150.9, 145.4, 140.5, 137.5, 136.3, 133.6, 131.0, 130.6 (2C), 129.9, 128.8, 127.8, 126.2, 121.0 (2C), 114.5 (2C), 113.4 (2C), 104.1, 55.5 (2C), 32.5. HRMS (ESI-TOF)  $m/z$ :  $[\text{M} + \text{H}]^+$  Calcd for  $\text{C}_{25}\text{H}_{21}\text{Cl}_2\text{N}_2\text{O}_3$ : 467.0929, Found: 467.0932.



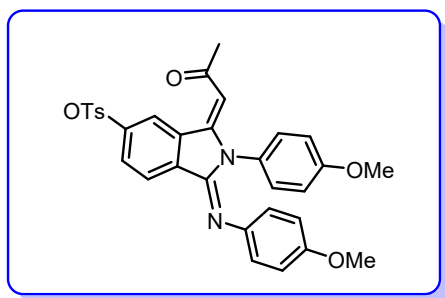

**(1Z, 3E)-2-(4-Methoxyphenyl)-1-((4-methoxyphenyl)imino)-3-(2-oxopropylidene)isoindolin-5-yl 4-methylbenzenesulfonate (8r)**,  $^1\text{H NMR}$  (400 MHz,  $\text{CDCl}_3$ )  $\delta$  9.00 (d,  $J = 2.0$  Hz, 1H), 7.79 (d,  $J = 8.0$  Hz, 2H), 7.34 (d,  $J = 8.0$  Hz, 2H), 7.25 (d,  $J = 8.0$  Hz, 2H), 7.08-7.04 (m, 3H), 6.85 (d,  $J = 8.8$  Hz, 2H), 6.79-6.75 (m, 3H), 5.57 (s, 1H), 3.87 (s, 3H), 3.81 (s, 3H), 2.44 (s, 3H), 2.14 (s, 3H).  $^{13}\text{C NMR}$  (100 MHz,  $\text{CDCl}_3$ )  $\delta$  195.6, 159.7, 156.2, 152.9, 151.7, 150.7, 145.6, 142.5, 136.3, 132.3, 130.5, 130.0, 128.5, 128.0, 126.4, 126.3, 125.1, 122.0, 121.2, 115.1, 114.5, 103.9, 55.5, 32.3, 21.8. HRMS (ESI-TOF)  $m/z$ :  $[\text{M} + \text{H}]^+$  Calcd for  $\text{C}_{32}\text{H}_{29}\text{N}_2\text{O}_6\text{S}$ : 569.1746, Found: 569.1749.

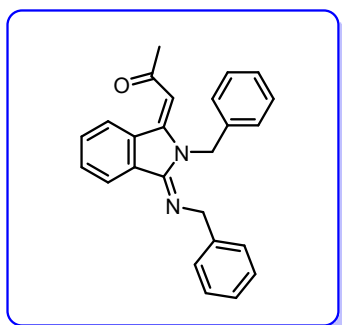

**1-((1E, 3Z)-2-Benzyl-3-(benzylimino)isoindolin-1-ylidene)propan-2-one (8s)**,  $^1\text{H NMR}$  (400 MHz,  $\text{CDCl}_3$ )  $\delta$  9.40 (d,  $J = 7.2$  Hz, 1H), 8.09 (d,  $J = 7.2$  Hz, 1H), 7.63-7.56 (m, 2H), 7.43 (d,  $J = 7.2$  Hz, 2H), 7.35-7.29 (m, 5H), 7.24 (dd,  $J = 4.4$  Hz, 7.2 Hz, 4H), 5.76 (s, 1H), 5.27 (s, 2H), 5.20 (s, 2H), 2.21 (s, 3H).  $^{13}\text{C NMR}$  (100 MHz,  $\text{CDCl}_3$ )  $\delta$  195.6, 152.9, 150.0, 140.9, 137.0, 135.2, 131.6, 131.1, 128.9, 128.6 (2C), 128.5, 128.4, 128.4 (2C), 127.1 (2C), 126.8 (2C), 126.6, 125.2, 101.2, 53.2, 44.0, 32.4. HRMS (ESI-TOF)  $m/z$ :  $[\text{M} + \text{H}]^+$  Calcd for  $\text{C}_{25}\text{H}_{23}\text{N}_2\text{O}$ : 367.1810, Found: 367.1815.

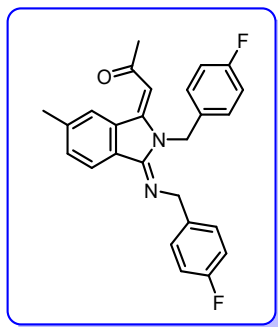

**1-((1E,3Z)-2-(4-Fluorobenzyl)-3-((4-fluorobenzyl)imino)-6-methyl-isoindolin-1-ylidene)propan-2-one (8t)**,  $^1\text{H NMR}$  (400 MHz,  $\text{CDCl}_3$ )  $\delta$  9.24 (s, 1H), 7.95 (d,  $J = 8.0$  Hz, 1H), 7.41-7.36 (m, 2H), 7.22-7.19 (m, 2H), 7.04-6.99 (m, 5H), 5.71 (s, 1H), 5.19 (s, 2H), 5.14 (s, 2H), 2.51 (s, 3H), 2.23 (s, 3H).  $^{13}\text{C NMR}$  (100 MHz,  $\text{CDCl}_3$ )  $\delta$  195.5, 152.9, 150.1, 142.4, 136.6 (d,  $J = 3.0$  Hz, 1C), 135.3, 132.7 (d,  $J = 3.0$  Hz, 1C), 132.0, 129.5 (d,  $J = 30.0$  Hz, 1C), 129.0, 128.6, 128.5, 128.4, 128.3, 127.2, 125.9, 124.9, 115.6, 115.4, 115.2, 115.0, 101.0, 52.5, 43.3, 32.4, 22.0.  $^{19}\text{F NMR}$  (300 MHz,  $\text{CDCl}_3$ )  $\delta$  -115.5, -116.6. HRMS (ESI-TOF)  $m/z$ :  $[\text{M} + \text{H}]^+$  Calcd for  $\text{C}_{26}\text{H}_{23}\text{F}_2\text{N}_2\text{O}$ : 417.1778, Found: 417.1782.

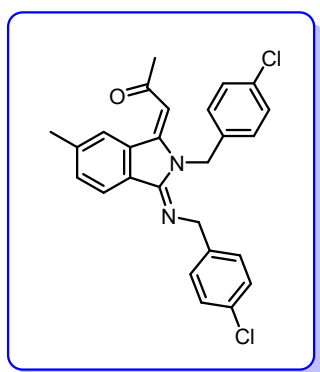

**1-((1E,3Z)-2-(4-Chlorobenzyl)-3-((4-chlorobenzyl)imino)-6-methyl-isoindolin-1-ylidene)propan-2-one (8u)**,  $^1\text{H NMR}$  (400 MHz,  $\text{CDCl}_3$ )  $\delta$  9.23 (s, 1H), 7.93 (d,  $J = 8.0$  Hz, 1H), 7.39 (d,  $J = 7.6$  Hz, 1H), 7.34 (d,  $J = 8.4$  Hz, 2H), 7.30-7.26 (m, 4H), 7.16 (d,  $J = 8.4$  Hz, 2H), 5.68 (s, 1H), 5.17 (s, 2H), 5.13 (s, 2H), 2.51 (s, 3H), 2.23 (s, 3H).  $^{13}\text{C NMR}$  (100 MHz,  $\text{CDCl}_3$ )  $\delta$  195.5, 153.0, 150.0, 142.5, 139.4, 135.5, 135.3, 132.9, 132.3, 132.0, 129.0, 128.8 (2C), 128.4 (2C), 128.4 (2C), 128.1 (2C), 125.8, 124.9,

101.1, 52.5, 43.4, 32.4, 22.0. HRMS (ESI-TOF)  $m/z$ :  $[M + H]^+$  Calcd for  $C_{26}H_{23}Cl_2N_2O$ : 449.1187, Found: 449.1188.

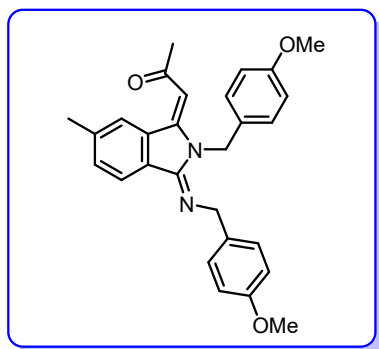

**1-((1E,3Z)-2-(4-Methoxybenzyl)-3-((4-methoxybenzyl)imino)-6-methyl-isoindolin-1-ylidene)propan-2-one (8v)**,  $^1H$  NMR (400 MHz,  $CDCl_3$ )  $\delta$  9.24 (s, 1H), 7.95 (d,  $J = 8.0$  Hz, 1H), 7.35 (d,  $J = 8.8$  Hz, 2H), 7.18 (d,  $J = 8.4$  Hz, 2H), 6.89-6.83 (m, 5H), 5.76 (s, 1H), 5.18 (s, 2H), 5.11 (s, 2H), 3.80 (s, 3H), 3.78 (s, 3H), 2.50 (s, 3H), 2.23 (s, 3H).  $^{13}C$  NMR (100 MHz,  $CDCl_3$ )  $\delta$  195.5, 158.6, 158.4, 152.9, 150.4, 142.2, 135.5, 133.2, 131.8, 129.2, 128.9, 128.2 (2C), 128.1 (2C), 126.0, 125.0, 114.0 (2C), 113.8 (2C), 100.8, 55.3, 55.2, 52.7, 43.4, 32.4, 22.0. HRMS (ESI-TOF)  $m/z$ :  $[M + H]^+$  Calcd for  $C_{28}H_{28}N_2O_3$ : 441.2178, Found: 441.2183.

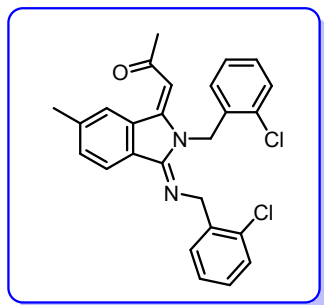

**1-((1E, 3Z)-2-(2-Chlorobenzyl)-3-((2-chlorobenzyl)imino)-6-methyl-isoindolin-1-ylidene)propan-2-one (8w)**,  $^1H$  NMR (400 MHz,  $CDCl_3$ )  $\delta$  9.26 (s, 1H), 7.97 (d,  $J = 8.0$  Hz, 1H), 7.63 (d,  $J = 7.6$  Hz, 1H), 7.43 (d,  $J = 7.6$  Hz, 2H), 7.37 (d,  $J = 7.6$  Hz, 1H), 7.24-7.12 (m, 4H), 6.99 (d,  $J = 7.6$  Hz, 1H), 5.66 (s, 1H), 5.30 (s, 2H), 5.24 (s, 2H), 2.52 (s, 3H), 2.23 (s, 3H).  $^{13}C$  NMR (100 MHz,  $CDCl_3$ )  $\delta$  195.7, 153.3, 149.9, 142.5, 138.2, 135.2, 134.0, 132.6, 132.4, 132.1, 129.4, 128.9 (2C), 128.4, 128.3, 127.7, 127.7,

127.1, 126.8, 125.9, 125.1, 101.1, 50.8, 41.5, 32.4, 22.0. HRMS (ESI-TOF)  $m/z$ :  $[M + H]^+$  Calcd for  $C_{26}H_{23}Cl_2N_2O$ : 449.1187, Found: 449.1189.

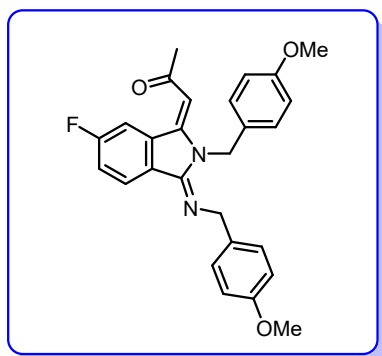

**1-((1E, 3Z)-6-Fluoro-2-(4-methoxybenzyl)-3-((4-methoxybenzyl)imino)isoindolin-1-ylidene)propan-2-one (8x)**,  $^1H$  NMR (400 MHz,  $CDCl_3$ )  $\delta$  9.25 (dd,  $J = 2.4$  Hz, 10.4 Hz, 1H), 8.05 (dd,  $J = 5.2$  Hz, 8.8 Hz, 1H), 7.34 (d,  $J = 8.4$  Hz, 2H), 7.18 (d,  $J = 8.4$  Hz, 2H), 6.90-6.84 (m, 5H), 5.79 (s, 1H), 5.17 (s, 2H), 5.11 (s, 2H), 3.80 (s, 3H), 3.78 (s, 3H), 2.23 (s, 3H).  $^{13}C$  NMR (100 MHz,  $CDCl_3$ )  $\delta$  195.6, 164.5 (d,  $J = 249.0$  Hz), 158.7, 158.4, 151.8, 149.1, 137.7, 132.8, 129.6, 128.8, 128.1, 126.6 (d,  $J = 9.0$  Hz), 124.6, 118.2 (d,  $J = 23.0$  Hz), 116.0 (q,  $J = 28.0$  Hz), 114.0 (d,  $J = 23.0$  Hz), 101.5, 55.3, 55.2, 52.7, 43.5, 32.4.  $^{19}F$  NMR (300 MHz,  $CDCl_3$ )  $\delta$  -106.3. HRMS (ESI-TOF)  $m/z$ :  $[M + H]^+$  Calcd for  $C_{27}H_{26}FN_2O_3$ : 445.1927. Found: 445.1929.

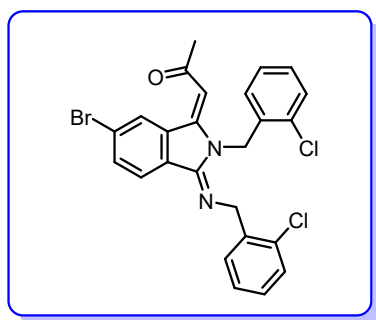

**1-((1E, 3Z)-6-Bromo-2-(2-chlorobenzyl)-3-((2-chlorobenzyl)imino)isoindolin-1-ylidene)propan-2-one (8y)**,  $^1H$  NMR (400 MHz,  $CDCl_3$ )  $\delta$  9.68 (s, 1H), 7.94 (d,  $J = 8.4$  Hz, 1H), 7.76 (dd,  $J = 1.6$  Hz, 8.8 Hz, 1H), 7.44 (d,  $J = 8.0$  Hz, 1H), 7.37 (d,  $J = 7.6$  Hz, 1H), 7.21-7.13 (m, 5H), 6.96 (d,  $J = 7.2$  Hz, 1H), 5.70 (s, 1H), 5.30 (s, 2H), 5.23 (s, 2H), 2.24 (s, 3H).  $^{13}C$  NMR (100 MHz,  $CDCl_3$ )  $\delta$  195.7, 152.4, 148.3, 137.8, 136.7, 134.4, 133.7, 132.6, 132.5, 131.7, 129.5, 129.0, 128.5, 128.3, 127.9, 127.6, 127.2,

126.9, 126.9, 126.7, 126.3, 102.1, 50.8, 41.6, 32.4. HRMS (ESI-TOF)  $m/z$ :  $[M + H]^+$   
Calcd for  $C_{25}H_{20}BrCl_2N_2O$ : 513.0136, Found: 513.0139.

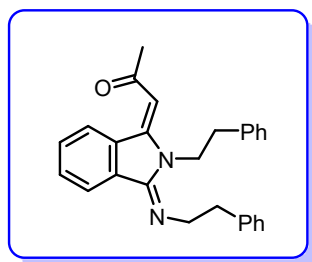

**1-((1E, 3Z)-2-Phenethyl-3-(phenethylimino)isoindolin-1-ylidene)propan-2-one (8z)**,  $^1H$  NMR (400 MHz,  $CDCl_3$ )  $\delta$  9.39 (d,  $J = 7.6$  Hz, 1H), 7.95 (d,  $J = 7.2$  Hz, 1H), 7.59-7.49 (m, 3H), 7.36-7.29 (m, 5H), 7.25-7.22 (m, 4H), 5.71 (s, 1H), 4.21 (t,  $J = 7.2$  Hz, 2H), 4.06 (t,  $J = 7.6$  Hz, 2H), 3.10 (t,  $J = 7.2$  Hz, 2H), 2.87 (t,  $J = 8.0$  Hz, 2H), 2.30 (s, 3H).  $^{13}C$  NMR (100 MHz,  $CDCl_3$ )  $\delta$  195.4, 151.7, 150.2, 140.6, 139.0, 135.0, 131.2, 130.9, 129.0 (2C), 129.0, 128.8 (2C), 128.5 (2C), 128.4, 128.3 (2C), 126.5, 126.1, 124.9, 99.5, 51.6, 41.9, 38.7, 33.4, 32.4. HRMS (ESI-TOF)  $m/z$ :  $[M + H]^+$  Calcd for  $C_{27}H_{27}N_2O$ : 395.2123, Found: 395.2125.

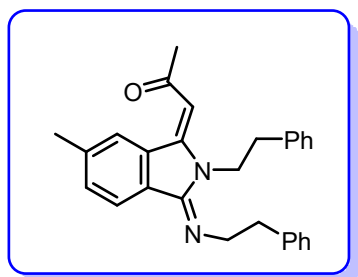

**1-((1E, 3Z)-6-Methyl-2-phenethyl-3-(phenethylimino)isoindolin-1-ylidene)propan-2-one (8za)**,  $^1H$  NMR (400 MHz,  $CDCl_3$ )  $\delta$  9.22 (s, 1H), 7.81 (d,  $J = 8.0$  Hz, 1H), 7.35-7.29 (m, 7H), 7.25-7.19 (m, 4H), 5.68 (s, 1H), 4.17 (t,  $J = 7.2$  Hz, 2H), 4.04 (t,  $J = 7.6$  Hz, 2H), 3.08 (t,  $J = 7.2$  Hz, 2H), 2.86 (t,  $J = 8.0$  Hz, 2H), 2.48 (s, 3H), 2.29 (s, 3H).  $^{13}C$  NMR (100 MHz,  $CDCl_3$ )  $\delta$  195.3, 151.8, 150.6, 141.8, 140.6, 139.1, 135.3, 131.7, 129.0 (2C), 128.8 (2C), 128.8, 128.5 (2C), 128.3 (2C), 126.4, 126.1, 125.9, 124.7, 99.2, 51.6, 41.8, 38.7, 33.4, 32.4, 21.9. HRMS (ESI-TOF)  $m/z$ :  $[M + H]^+$  Calcd for  $C_{28}H_{29}N_2O$ : 409.2280, Found: 409.2285.

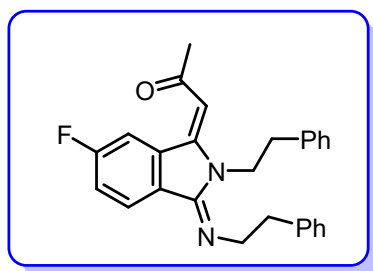

**1-((1E, 3Z)-6-Fluoro-2-phenethyl-3-(phenethylimino)isoindolin-1-ylidene)propan-2-one (8zb)**,  $^1\text{H NMR}$  (400 MHz,  $\text{CDCl}_3$ )  $\delta$  9.24 (dd,  $J = 2.8$  Hz, 10.4 Hz, 1H), 7.91 (dd,  $J = 5.2$  Hz, 8.8 Hz, 1H), 7.35-7.29 (m, 7H), 7.24-7.19 (m, 4H), 5.70 (s, 1H), 4.16 (t,  $J = 7.2$  Hz, 2H), 4.05 (t,  $J = 8.0$  Hz, 2H), 3.09 (t,  $J = 7.2$  Hz, 2H), 2.86 (t,  $J = 7.6$  Hz, 2H), 2.30 (s, 3H).  $^{13}\text{C NMR}$  (100 MHz,  $\text{CDCl}_3$ )  $\delta$  195.4, 165.5, 163.0, 150.7, 149.3, 140.4, 138.9, 137.4 (d,  $J = 12.0$  Hz, 1C), 129.0 (2C), 128.8 (2C), 128.6 (2C), 128.3 (2C), 126.5, 126.3 (d,  $J = 9.0$  Hz, 1C) 126.1, 118.0 (d,  $J = 23.0$  Hz, 1C), 115.9 (d,  $J = 27.0$  Hz, 1C), 100.0, 51.5, 41.9, 38.7, 33.3, 32.4.  $^{19}\text{F NMR}$  (300 MHz,  $\text{CDCl}_3$ )  $\delta$  -106.8. HRMS (ESI-TOF)  $m/z$ :  $[\text{M} + \text{H}]^+$  Calcd for  $\text{C}_{27}\text{H}_{26}\text{FN}_2\text{O}$ : 413.2029, Found: 413.2033.

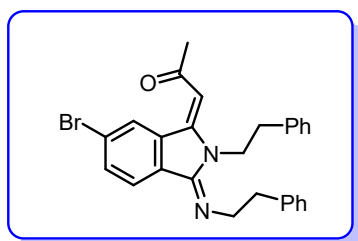

**1-((1E, 3Z)-6-Bromo-2-phenethyl-3-(phenethylimino)isoindolin-1-ylidene)propan-2-one (8zc)**,  $^1\text{H NMR}$  (400 MHz,  $\text{CDCl}_3$ )  $\delta$  9.64 (d,  $J = 1.6$  Hz, 1H), 7.78 (d,  $J = 8.4$  Hz, 1H), 7.64 (dd,  $J = 1.6$  Hz, 8.0 Hz, 1H), 7.32-7.30 (m, 6H), 7.24-7.21 (m, 4H), 5.69 (s, 1H), 4.15 (t,  $J = 7.2$  Hz, 2H), 4.04 (t,  $J = 7.6$  Hz, 2H), 3.08 (t,  $J = 7.2$  Hz, 2H), 2.86 (t,  $J = 8.0$  Hz, 2H), 2.29 (s, 3H).  $^{13}\text{C NMR}$  (100 MHz,  $\text{CDCl}_3$ )  $\delta$  195.4, 150.8, 149.0, 140.4, 138.8, 136.7, 133.9, 131.5, 129.0 (2C), 128.8 (2C), 128.6 (2C), 128.3 (2C), 127.0, 126.5, 126.2, 125.9, 125.9, 100.1, 51.6, 42.0, 38.7, 33.3, 32.4. HRMS (ESI-TOF)  $m/z$ :  $[\text{M} + \text{H}]^+$  Calcd for  $\text{C}_{27}\text{H}_{26}\text{BrN}_2\text{O}$ : 473.1229, Found: 473.1233.

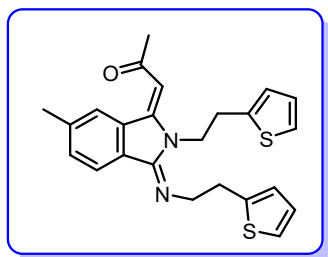

**1-((1E,3Z)-6-Methyl-2-(2-(thiophen-2-yl)ethyl)-3-((2-(thiophen-2-yl)ethyl)imino)isoindolin-1-ylidene)propan-2-one (8zd), <sup>1</sup>H NMR (400 MHz, CDCl<sub>3</sub>) δ** 9.22 (s, 1H), 7.82 (d, *J* = 8.0 Hz, 1H), 7.33 (d, *J* = 7.6 Hz, 1H), 7.18 (dd, *J* = 0.8 Hz, 5.2 Hz, 1H), 7.14 (dd, *J* = 1.2 Hz, 5.2 Hz, 1H), 6.97-6.93 (m, 3H), 6.88 (d, *J* = 2.8 Hz, 1H), 5.70 (s, 1H), 4.18 (t, *J* = 6.8 Hz, 2H), 4.13 (t, *J* = 7.6 Hz, 2H), 3.30 (t, *J* = 6.4 Hz, 2H), 3.13 (t, *J* = 8.0 Hz, 2H), 2.49 (s, 3H), 2.31 (s, 3H). **<sup>13</sup>C NMR (100 MHz, CDCl<sub>3</sub>) δ** 195.5, 152.0, 150.4, 143.1, 141.9, 141.2, 135.3, 131.8, 128.8, 127.0, 126.5, 125.9, 125.4, 125.0, 124.7, 123.8, 123.7, 99.4, 51.4, 42.0, 32.9, 32.4, 27.5, 22.0. HRMS (ESI-TOF) *m/z*: [M + H]<sup>+</sup> Calcd for C<sub>24</sub>H<sub>25</sub>N<sub>2</sub>OS<sub>2</sub>: 421.1408, Found: 421.1410.

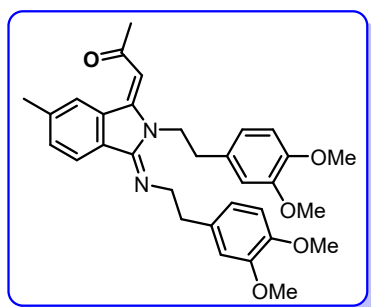

**1-((1E,3Z)-2-(3,4-Dimethoxyphenethyl)-3-((3,4-dimethoxyphenethyl)imino)-6-methyl-isoindolin-1-ylidene)propan-2-one (8ze), <sup>1</sup>H NMR (400 MHz, CDCl<sub>3</sub>) δ** 9.22 (s, 1H), 7.82 (d, *J* = 8.0 Hz, 1H), 7.32 (d, *J* = 8.0 Hz, 1H), 6.85 (s, 2H), 6.81 (s, 1H), 6.79 (s, 1H), 6.78 (d, *J* = 1.6 Hz, 1H), 6.73 (d, *J* = 1.6 Hz, 1H), 5.69 (s, 1H), 4.14 (t, *J* = 7.2 Hz, 2H), 4.05 (t, *J* = 7.6 Hz, 2H), 3.86 (s, 3H), 3.85 (s, 6H), 3.80 (s, 3H), 3.01 (t, *J* = 7.6 Hz, 2H), 2.84 (t, *J* = 7.6 Hz, 2H), 2.48 (s, 3H), 2.30 (s, 3H). **<sup>13</sup>C NMR (100 MHz, CDCl<sub>3</sub>) δ** 195.3, 151.9, 150.6, 149.0, 148.8, 147.7, 147.5, 141.9, 135.3, 133.2, 131.7 (2C), 128.8, 125.9, 124.7, 120.8, 120.8, 112.4, 112.2, 111.4, 111.3, 99.3, 56.0, 55.9, 55.8, 55.8, 51.9, 41.9, 38.4, 33.0, 32.4, 22.0. HRMS (ESI-TOF) *m/z*: [M + H]<sup>+</sup> Calcd for C<sub>32</sub>H<sub>37</sub>N<sub>2</sub>O<sub>5</sub>: 529.2702, Found: 529.2726.

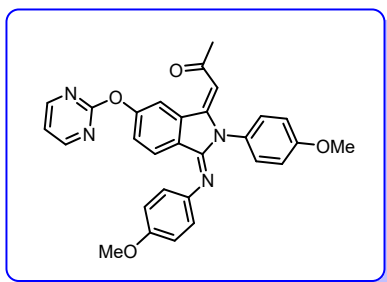

**1-((1E, 3E)-2-(4-Methoxyphenyl)-3-((4-methoxyphenyl)imino)-6-(pyrimidin-2-yloxy)isoindolin-1-ylidene)propan-2-one (8zf), <sup>1</sup>H NMR (400 MHz, CDCl<sub>3</sub>) δ** 9.27 (d, *J* = 2.4 Hz, 1H), 8.55 (d, *J* = 4.8 Hz, 2H), 7.27 (d, *J* = 8.8 Hz, 2H), 7.12-7.04 (m, 4H), 6.87-6.81 (m, 5H), 5.61 (s, 1H), 3.87 (s, 3H), 3.80 (s, 3H), 2.15 (s, 3H). **<sup>13</sup>C NMR (100 MHz, CDCl<sub>3</sub>) δ** 196.0, 165.1, 159.8, 159.6, 156.1, 155.3, 153.4, 151.5, 142.8, 136.5, 130.5, 128.2, 126.6, 125.2, 124.6, 121.7, 121.3, 116.6, 115.1, 114.5, 103.6, 55.5, 32.4. HRMS (ESI-TOF) *m/z*: [M + H]<sup>+</sup> Calcd for C<sub>29</sub>H<sub>25</sub>N<sub>4</sub>O<sub>4</sub>: 493.1876, Found: 493.1879.

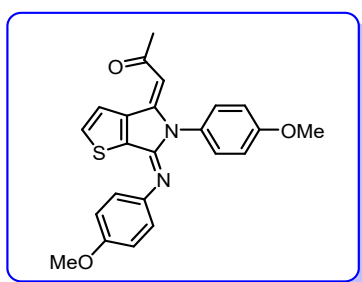

**(E)-1-((E)-5-(4-Methoxyphenyl)-6-((4-methoxyphenyl)imino)-5,6-dihydro-4H-thieno[2,3-c]pyrrol-4-ylidene)propan-2-one (8zg), <sup>1</sup>H NMR (400 MHz, CDCl<sub>3</sub>) δ** 8.19 (d, *J* = 7.2 Hz, 1H), 7.43 (d, *J* = 6.4 Hz, 1H), 7.32 (d, *J* = 8.8 Hz, 2H), 7.06 (d, *J* = 8.8 Hz, 2H), 6.87 (d, *J* = 1.2 Hz, 4H), 5.53 (s, 1H), 3.87 (s, 3H), 3.81 (s, 3H), 2.18 (s, 3H). **<sup>13</sup>C NMR (100 MHz, CDCl<sub>3</sub>) δ** 196.2, 159.6, 156.8, 152.3, 148.2, 144.2, 143.3, 133.6, 132.6, 130.7, 128.1, 125.7, 122.2, 115.0, 114.6, 101.7, 55.5, 55.4, 32.0. HRMS (ESI-TOF) *m/z*: [M + H]<sup>+</sup> Calcd for C<sub>23</sub>H<sub>21</sub>N<sub>2</sub>O<sub>3</sub>S: 405.1273, Found: 405.1278.



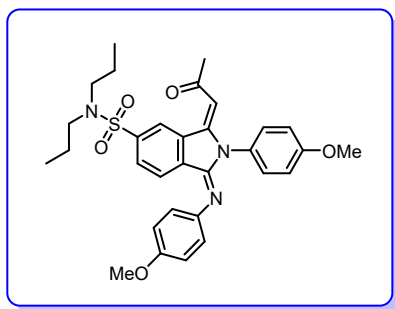

(1E, 3E)-2-(4-Methoxyphenyl)-1-((4-methoxyphenyl)imino)-3-(2-oxopropylidene)-N,N-dipropylisoindoline-5-sulfonamide (**8zh**),  $^1\text{H}$  NMR (400 MHz,  $\text{CDCl}_3$ )  $\delta$  9.76 (d,  $J = 1.2$  Hz, 1H), 7.74 (dd,  $J = 1.6$  Hz, 8.4 Hz, 1H), 7.28 (d,  $J = 8.8$  Hz, 2H), 7.08 (d,  $J = 8.8$  Hz, 2H), 6.91 (d,  $J = 8.4$  Hz, 1H), 6.87 (d,  $J = 8.8$  Hz, 2H), 6.80 (d,  $J = 8.8$  Hz, 2H), 5.67 (s, 1H), 3.87 (s, 3H), 3.82 (s, 3H), 3.19 (t,  $J = 7.6$  Hz, 4H), 2.21 (s, 3H), 1.62-1.58 (m, 4H), 0.89 (t,  $J = 7.6$  Hz, 4H).  $^{13}\text{C}$  NMR (100 MHz,  $\text{CDCl}_3$ )  $\delta$  196.1, 159.8, 156.4, 152.7, 150.4, 143.5, 142.3, 135.3, 130.4, 130.3, 129.5, 127.8, 126.4, 125.6, 121.1, 115.2, 114.6, 104.3, 55.5, 55.5, 50.4, 32.4, 22.2, 11.2. HRMS (ESI-TOF)  $m/z$ :  $[\text{M} + \text{H}]^+$  Calcd for  $\text{C}_{31}\text{H}_{36}\text{N}_3\text{O}_5\text{S}$ : 562.2376, Found: 562.2379.

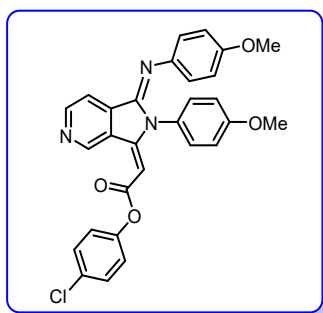

4-Chlorophenyl (*E*)-2-((*Z*)-2-(4-methoxyphenyl)-1-((4-methoxyphenyl)imino)-1,2-dihydro-3*H*-pyrrolo[3,4-*c*]pyridin-3-ylidene)acetate (**8zi**),  $^1\text{H}$  NMR (400 MHz,  $\text{CDCl}_3$ )  $\delta$  10.41 (s, 1H), 8.59 (d,  $J = 4.2$  Hz, 1H), 7.37-7.33 (m, 4H), 7.11 (d,  $J = 8.8$  Hz, 2H), 7.08 (d,  $J = 8.8$  Hz, 2H), 6.89 (d,  $J = 8.8$  Hz, 2H), 6.83 (d,  $J = 8.8$  Hz, 2H), 6.71 (d,  $J = 4.2$  Hz, 1H), 5.52 (s, 1H), 3.88 (s, 3H), 3.84 (s, 3H).  $^{13}\text{C}$  NMR (100 MHz,  $\text{CDCl}_3$ )  $\delta$  164.8, 160.0, 156.6, 153.0, 152.3, 151.6, 150.4, 149.3, 141.9, 134.3, 131.0, 130.4, 129.5, 129.0, 128.2, 127.4, 125.3, 123.1, 121.0, 118.5, 115.3, 114.5, 94.2, 55.5 (2C). HRMS (ESI-TOF)  $m/z$ :  $[\text{M} + \text{H}]^+$  Calcd for  $\text{C}_{29}\text{H}_{23}\text{ClN}_3\text{O}_4$ : 512.1377, Found: 512.1379.

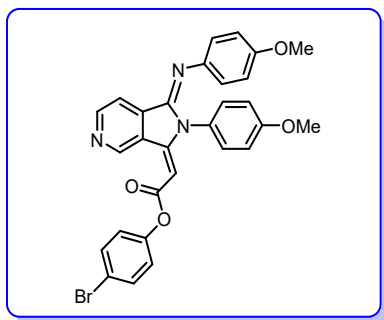

**4-Bromophenyl (*E*)-2-((*Z*)-2-(4-methoxyphenyl)-1-((4-methoxyphenyl)imino)-1,2-dihydro-3*H*-pyrrolo[3,4-*c*]pyridin-3-ylidene)acetate (8zj), <sup>1</sup>H NMR (400 MHz, CDCl<sub>3</sub>) δ 10.40 (s, 1H), 8.59 (d, *J* = 4.8 Hz, 1H), 7.50 (d, *J* = 8.8 Hz, 2H), 7.33 (d, *J* = 8.8 Hz, 2H), 7.11 (d, *J* = 8.8 Hz, 2H), 7.02 (d, *J* = 8.8 Hz, 2H), 6.89 (d, *J* = 8.2 Hz, 2H), 6.82 (d, *J* = 8.8 Hz, 2H), 6.71 (d, *J* = 5.2 Hz, 1H), 5.52 (s, 1H), 3.88 (s, 3H), 3.83 (s, 3H). <sup>13</sup>C NMR (100 MHz, CDCl<sub>3</sub>) δ 164.7, 160.0, 156.6, 153.0, 152.3, 151.5, 150.3, 149.8, 141.9, 134.3, 132.4, 130.3, 129.1, 127.4, 123.6, 121.0, 118.7, 118.6, 115.3, 114.5, 94.2, 55.5, 55.4. HRMS (ESI-TOF) *m/z*: [M + H]<sup>+</sup> Calcd for C<sub>29</sub>H<sub>23</sub>BrN<sub>3</sub>O<sub>4</sub>: 556.0872, Found: 556.0876.**

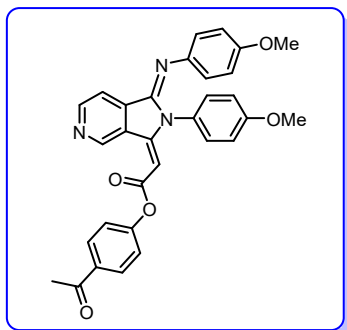

**4-Acetylphenyl (*E*)-2-((*Z*)-2-(4-methoxyphenyl)-1-((4-methoxyphenyl)imino)-1,2-dihydro-3*H*-pyrrolo[3,4-*c*]pyridin-3-ylidene)acetate (8zk), <sup>1</sup>H NMR (400 MHz, CDCl<sub>3</sub>) δ 10.41 (s, 1H), 8.60 (d, *J* = 5.2 Hz, 1H), 8.01 (d, *J* = 8.4 Hz, 2H), 7.34 (d, *J* = 8.8 Hz, 2H), 7.24 (d, *J* = 8.8 Hz, 2H), 7.12 (d, *J* = 8.8 Hz, 2H), 6.89 (d, *J* = 8.8 Hz, 2H), 6.83 (d, *J* = 8.8 Hz, 2H), 6.72 (d, *J* = 4.8 Hz, 1H), 5.54 (s, 1H), 3.88 (s, 3H), 3.84 (s, 3H), 2.60 (s, 3H). <sup>13</sup>C NMR (100 MHz, CDCl<sub>3</sub>) δ 196.9, 164.5, 160.0, 156.6, 154.6, 153.2, 152.3, 151.6, 150.3, 141.9, 134.5, 134.3, 130.3, 129.9, 129.1, 127.4, 121.9,**

121.0, 118.6, 115.4, 114.5, 94.0, 55.5 (2C), 26.6. HRMS (ESI-TOF)  $m/z$ :  $[M + H]^+$   
Calcd for  $C_{31}H_{26}N_3O_5$ : 520.1872, Found: 520.1876.

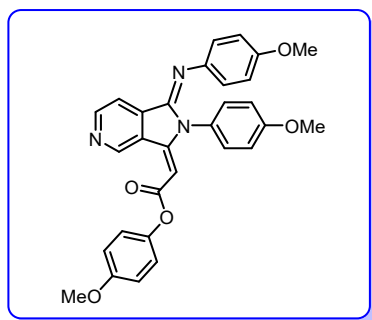

**4-Methoxyphenyl (E)-2-((Z)-2-(4-methoxyphenyl)-1-((4-methoxyphenyl)imino)-1,2-dihydro-3H-pyrrolo[3,4-c]pyridin-3-ylidene)acetate (8zl)**,  $^1H$  NMR (400 MHz,  $CDCl_3$ )  $\delta$  10.43 (s, 1H), 8.58 (d,  $J = 5.2$  Hz, 1H), 7.34 (dd,  $J = 2.0$  Hz, 6.8 Hz, 2H), 7.10 (dd,  $J = 2.4$  Hz, 7.2 Hz, 2H), 7.04 (dd,  $J = 2.0$  Hz, 6.8 Hz, 2H), 6.92-6.88 (m, 4H), 6.82 (dd,  $J = 2.0$  Hz, 6.4 Hz, 2H), 6.69 (d,  $J = 5.2$  Hz, 1H), 5.54 (s, 1H), 3.88 (s, 3H), 3.86 (s, 3H), 3.80 (s, 3H).  $^{13}C$  NMR (100 MHz,  $CDCl_3$ )  $\delta$  165.5, 159.9, 157.2, 156.7, 156.5, 155.3, 152.4, 152.3, 151.4, 150.5, 144.2, 142.1, 134.3, 130.4, 129.2, 127.5, 122.6, 122.5, 121.1, 118.5, 115.3, 114.5, 94.9, 55.6, 55.5, 55.4. HRMS (ESI-TOF)  $m/z$ :  $[M + H]^+$  Calcd for  $C_{30}H_{26}N_3O_5$ : 508.1872, Found: 508.1875.

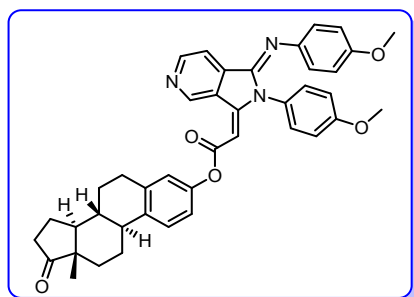

**(8R, 9S, 13S, 14S)-13-Methyl-17-oxo-7,8,9,11,12,13,14,15,16,17-decahydro-6H-cyclopenta[a]phenanthren-3-yl (E)-2-((Z)-2-(4-methoxyphenyl)-1-((4-methoxyphenyl)imino)-1,2-dihydro-3H-pyrrolo[3,4-c]pyridin-3-ylidene)acetate (8zm)**,  $^1H$  NMR (400 MHz,  $CDCl_3$ )  $\delta$  10.44 (s, 1H), 8.58 (d,  $J = 4.8$  Hz, 1H), 7.34 (d,  $J = 8.8$  Hz, 2H), 7.25 (d,  $J = 8.8$  Hz, 2H), 7.19 (s, 1H), 7.12 (d,  $J = 9.2$  Hz, 2H), 6.89 (d,  $J = 8.8$  Hz, 2H), 6.83 (d,  $J = 8.8$  Hz, 2H), 6.70 (d,  $J = 4.2$  Hz, 1H), 5.55 (s, 1H), 3.88 (s, 3H), 3.84 (s, 3H), 2.92 (t,  $J = 4.0$  Hz, 2H), 2.51 (q,  $J = 8.8$  Hz, 1H), 2.43-2.39 (m,

1H), 2.31-2.27 (m, 1H), 2.19-2.14 (m, 1H), 2.13-2.09 (m, 1H), 2.06-1.96 (m, 4H), 0.91 (s, 3H). <sup>13</sup>C NMR (100 MHz, CDCl<sub>3</sub>) δ 165.5, 159.9, 156.5, 152.4, 152.3, 151.4, 150.4, 148.6, 142.0, 138.0, 137.8, 137.3, 134.3, 130.4, 129.2, 129.0, 128.2, 127.5, 126.4, 125.3, 121.8, 121.0, 119.0, 118.5, 115.3, 114.5, 94.9, 55.5, 55.4 (2C), 47.9, 44.2, 38.0, 35.8, 31.5, 29.4, 26.3, 25.7, 21.6, 13.8. HRMS (ESI-TOF) m/z: [M + H]<sup>+</sup> Calcd for C<sub>41</sub>H<sub>40</sub>N<sub>3</sub>O<sub>5</sub>: 654.2968, Found: 654.2969.

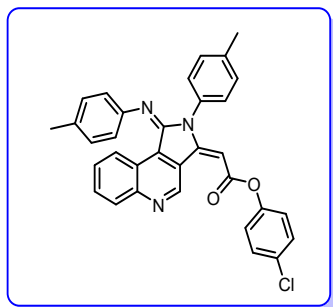

**4-Chlorophenyl**                      **(E)-2-((E)-2-(p-tolyl)-1-(p-tolylimino)-1,2-dihydro-3H-pyrrolo[3,4-c]quinolin-3-ylidene)acetate (8zn)**, <sup>1</sup>H NMR (400 MHz, CDCl<sub>3</sub>) δ 10.53 (s, 1H), 9.50 (d, *J* = 8.8 Hz, 1H), 8.26 (d, *J* = 8.4 Hz, 1H), 7.85 (t, *J* = 8.0 Hz, 1H), 7.69 (t, *J* = 7.6 Hz, 1H), 7.34 (d, *J* = 8.8 Hz, 2H), 7.06 (d, *J* = 8.8 Hz, 2H), 6.94 (d, *J* = 8.0 Hz, 2H), 6.88 (d, *J* = 8.0 Hz, 2H), 6.70 (d, *J* = 8.0 Hz, 2H), 6.43 (d, *J* = 8.4 Hz, 2H), 5.42 (s, 1H), 2.28 (s, 3H), 2.17 (s, 3H). <sup>13</sup>C NMR (100 MHz, CDCl<sub>3</sub>) δ 164.7, 154.1, 149.6, 149.2, 148.5, 144.2, 138.6, 133.4, 131.7, 131.0, 129.8, 129.6, 129.5, 129.4, 129.4, 128.6, 128.3, 125.9, 123.1, 122.8, 122.4, 120.0, 116.8, 116.0, 95.1, 21.0, 20.6. HRMS (ESI-TOF) m/z: [M + H]<sup>+</sup> Calcd for C<sub>33</sub>H<sub>25</sub>ClN<sub>3</sub>O<sub>2</sub>: 530.1635, Found: 530.1638.

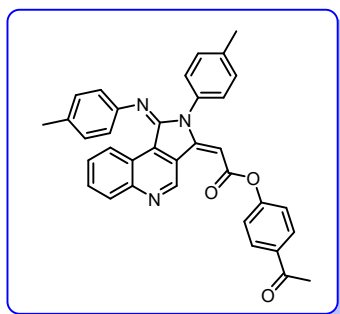

**4-Acetylphenyl**                      **(E)-2-((E)-2-(p-tolyl)-1-(p-tolylimino)-1,2-dihydro-3H-pyrrolo[3,4-c]quinolin-3-ylidene)acetate (8zo)**, <sup>1</sup>H NMR (400 MHz, CDCl<sub>3</sub>) δ 10.53

(d,  $J = 2.0$  Hz, 1H), 9.50 (d,  $J = 8.4$  Hz, 1H), 8.26 (d,  $J = 8.4$  Hz, 1H), 8.00 (d,  $J = 8.8$  Hz, 2H), 7.85 (t,  $J = 6.8$  Hz, 1H), 7.69 (t,  $J = 7.6$  Hz, 1H), 7.23 (d,  $J = 8.4$  Hz, 2H), 6.95 (d,  $J = 8.4$  Hz, 2H), 6.89 (d,  $J = 8.4$  Hz, 2H), 6.71 (d,  $J = 8.0$  Hz, 2H), 6.43 (d,  $J = 8.0$  Hz, 2H), 5.44 (s, 1H), 2.60 (s, 3H), 2.28 (s, 3H), 2.17 (s, 3H).  $^{13}\text{C}$  NMR (100 MHz,  $\text{CDCl}_3$ )  $\delta$  196.9, 164.4, 154.6, 154.4, 149.6, 148.5, 147.3, 144.1, 138.6, 136.5, 134.5, 133.3, 131.8, 131.1, 129.9, 129.8, 129.7, 129.4, 128.6, 128.3, 126.4, 125.9, 122.4, 121.9, 119.9, 94.9, 26.6, 21.0, 20.6. HRMS (ESI-TOF)  $m/z$ :  $[\text{M} + \text{H}]^+$  Calcd for  $\text{C}_{35}\text{H}_{28}\text{N}_3\text{O}_3$ : 538.2131, Found: 538.2138.

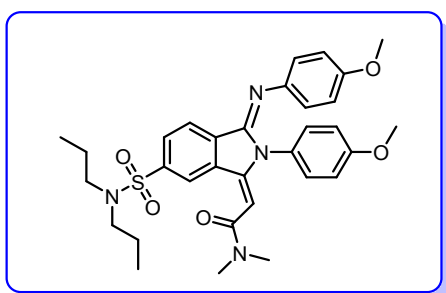

2-((1*E*, 3*Z*)-6-(*N,N*-Dipropylsulfamoyl)-2-(4-methoxyphenyl)-3-((4-methoxyphenyl)imino)isoindolin-1-ylidene)-*N,N*-dimethylacetamide (10a),  $^1\text{H}$  NMR (400 MHz,  $\text{CDCl}_3$ )  $\delta$  8.81 (s, 1H), 7.64 (dd,  $J = 1.6\text{Hz}, 8.0$  Hz, 1H), 7.33 (dd,  $J = 2.0$  Hz, 6.8 Hz, 2H), 7.05 (d,  $J = 8.8$  Hz, 2H), 6.88-6.80 (m, 5H), 5.44 (s, 1H), 3.85 (s, 3H), 3.82 (s, 2H), 3.12 (t,  $J = 7.6$  Hz, 4H), 3.05 (s, 3H), 2.97 (s, 3H), 1.59 (q,  $J = 7.6$  Hz, 4H), 0.89 (t,  $J = 7.6$  Hz, 6H).  $^{13}\text{C}$  NMR (100 MHz,  $\text{CDCl}_3$ )  $\delta$  166.7, 159.5, 156.1, 152.2, 145.7, 142.7, 142.4, 135.3, 130.4, 128.2, 128.0, 127.2, 125.8, 124.5, 121.5, 115.1, 114.4, 98.3, 55.5, 50.6, 38.1, 35.1, 22.3, 11.2. HRMS (ESI-TOF)  $m/z$ :  $[\text{M} + \text{H}]^+$  Calcd for  $\text{C}_{32}\text{H}_{39}\text{N}_4\text{O}_5\text{S}$ : 591.2641, Found: 591.2644.

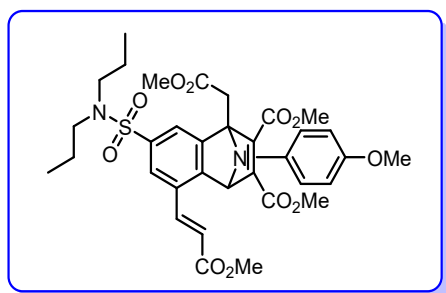

**Dimethyl (*E*)-7-(*N,N*-dipropylsulfamoyl)-1-(2-methoxy-2-oxoethyl)-5-(3-methoxy-3-oxoprop-1-en-1-yl)-9-(4-methoxyphenyl)-1,4-dihydro-1,4-epiminonaphthalene-2,3-dicarboxylate (6w-I), <sup>1</sup>H NMR (400 MHz, CDCl<sub>3</sub>) δ 7.90 (d, *J* = 16.0 Hz, 1H), 7.74 (s, 1H), 7.58 (d, *J* = 0.8 Hz, 1H), 6.75 (s, 4H), 6.60 (d, *J* = 16.0 Hz, 1H), 5.71 (s, 1H), 3.85 (s, 3H), 3.83 (s, 3H), 3.76 (s, 3H), 3.73 (s, 3H), 3.65 (d, *J* = 17.2 Hz, 1H), 3.61 (s, 3H), 3.29 (d, *J* = 17.2 Hz, 1H), 3.09-3.04 (m, 4H), 1.54 (q, *J* = 3.6 Hz, 4H), 0.86 (t, *J* = 11.2 Hz, 6H). <sup>13</sup>C NMR (100 MHz, CDCl<sub>3</sub>) δ 169.7, 166.7, 164.4, 162.4, 157.2, 151.6, 150.5, 146.6, 139.1, 138.8, 135.7, 129.0, 124.6, 123.4, 121.7, 120.1, 114.3, 80.3, 69.6, 55.3, 52.6, 52.3, 52.1, 52.0, 50.0, 31.4, 22.0, 11.2. HRMS (ESI-TOF) *m/z*: [M + H]<sup>+</sup> Calcd for C<sub>34</sub>H<sub>41</sub>N<sub>2</sub>O<sub>11</sub>S: 685.2431, Found: 685.2432.**

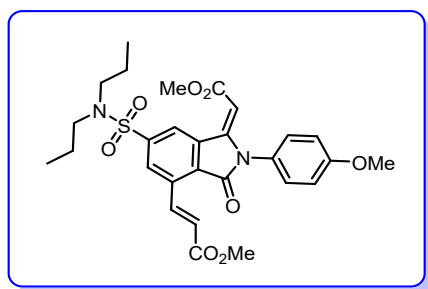

**Methyl (*E*)-3-((*E*)-6-(*N,N*-dipropylsulfamoyl)-1-(2-methoxy-2-oxoethylidene)-2-(4-methoxyphenyl)-3-oxoisindolin-4-yl)acrylate (6w-II), <sup>1</sup>H NMR (400 MHz, CDCl<sub>3</sub>) δ 9.65 (s, 1H), 8.90 (d, *J* = 16.0 Hz, 1H), 8.31 (s, 1H), 7.19 (d, *J* = 8.0 Hz, 2H), 7.05 (d, *J* = 8.8 Hz, 2H), 6.67 (d, *J* = 16.4 Hz, 1H), 5.62 (s, 1H), 3.88 (s, 3H), 3.81 (s, 3H), 3.76 (s, 3H), 3.24 (t, *J* = 7.6 Hz, 4H), 1.66-1.60 (m, 4H), 0.92 (t, *J* = 7.6 Hz, 6H). <sup>13</sup>C NMR (100 MHz, CDCl<sub>3</sub>) δ 166.3, 165.9, 165.6, 160.2, 148.0, 145.7, 137.1, 135.3, 134.0, 129.8, 128.7, 127.1, 125.4, 123.7, 115.2, 101.8, 55.6, 52.1, 51.9, 50.2, 22.1, 11.2. HRMS (ESI-TOF) *m/z*: [M + H]<sup>+</sup> Calcd for C<sub>28</sub>H<sub>33</sub>N<sub>2</sub>O<sub>8</sub>S: 557.1958, Found: 557.1962.**

## F. NMR spectra

### 4-Chlorophenyl 2-((*E*)-2-(4-methoxyphenyl)-6-methyl-3-((*Z*)-4-methylbenzylidene)isoindolin-1-ylidene)acetate (4a)

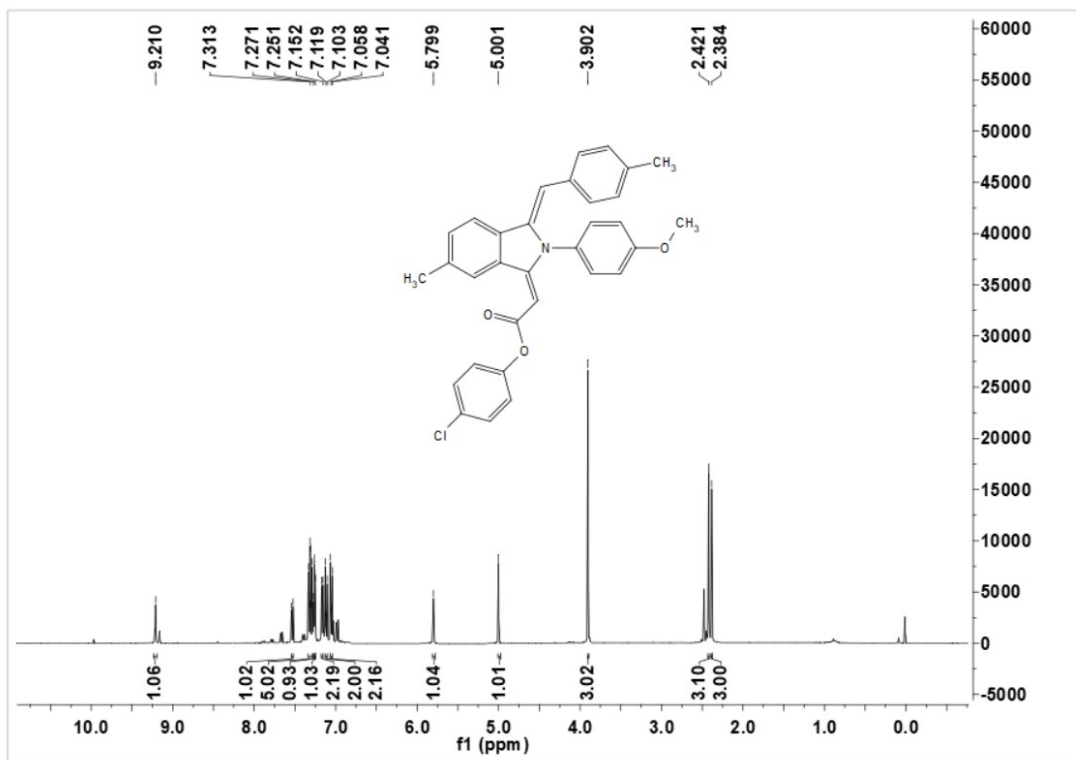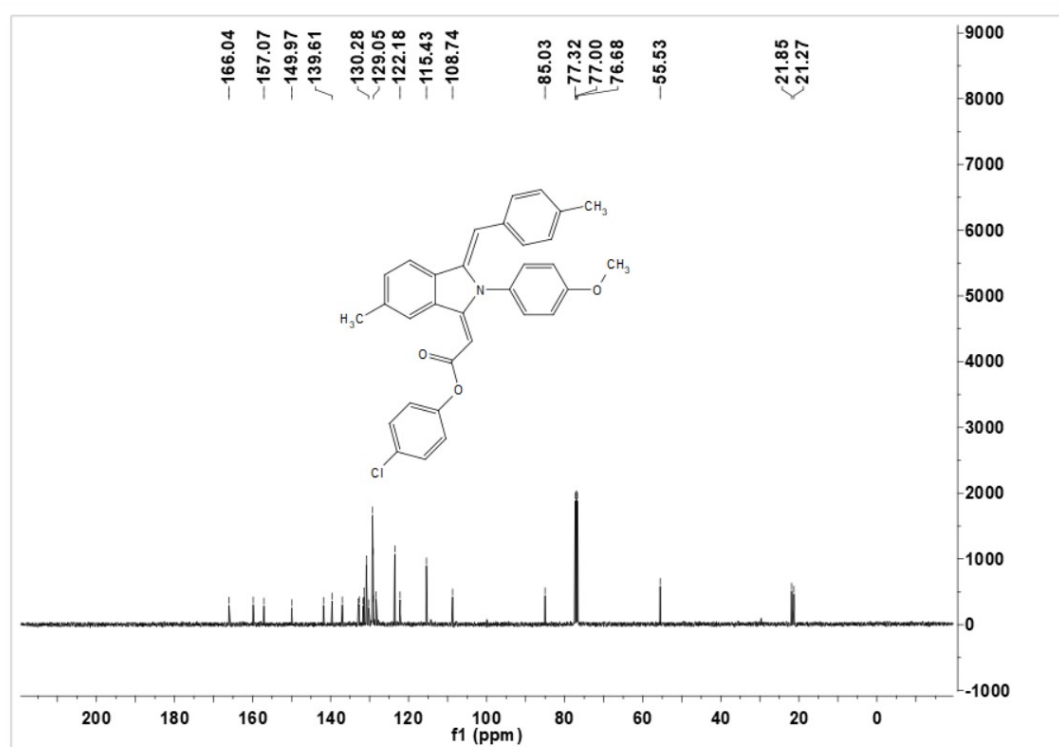

**Methyl 4-(((1Z,3E)-2-(4-bromophenyl)-5-(*tert*-butyl)-3-(2-(4-methoxyphenoxy)-2-oxoethylidene)isoindolin-1-ylidene)methyl)benzoate (4b)**

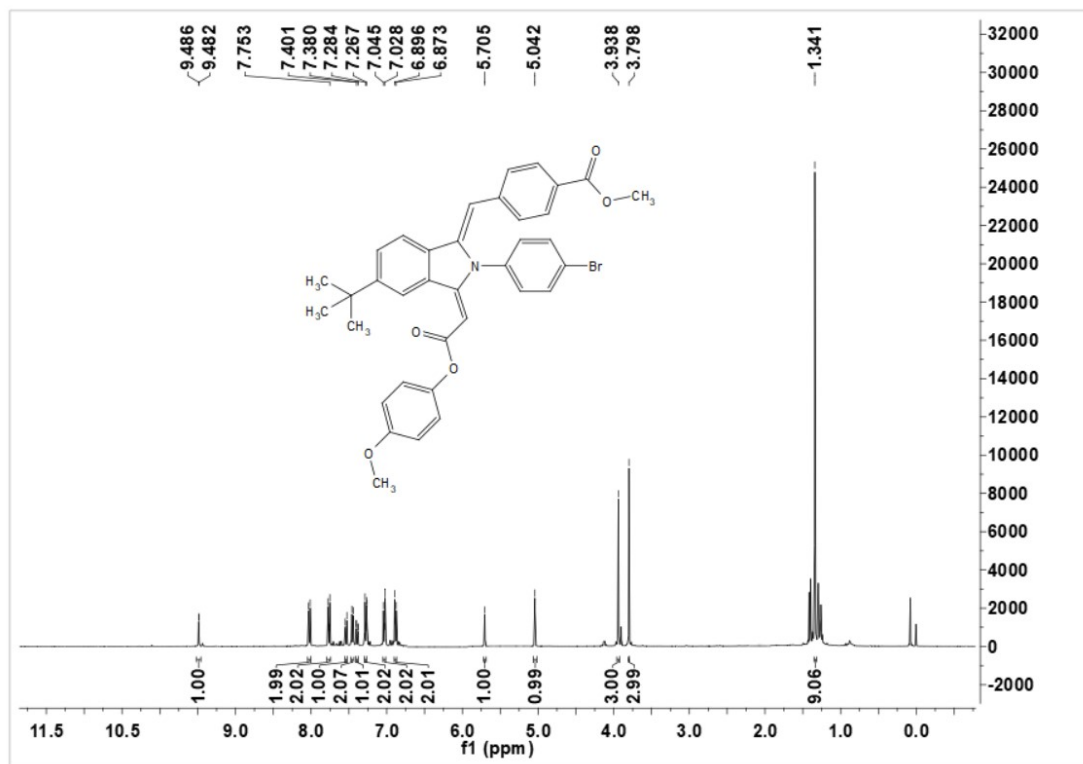



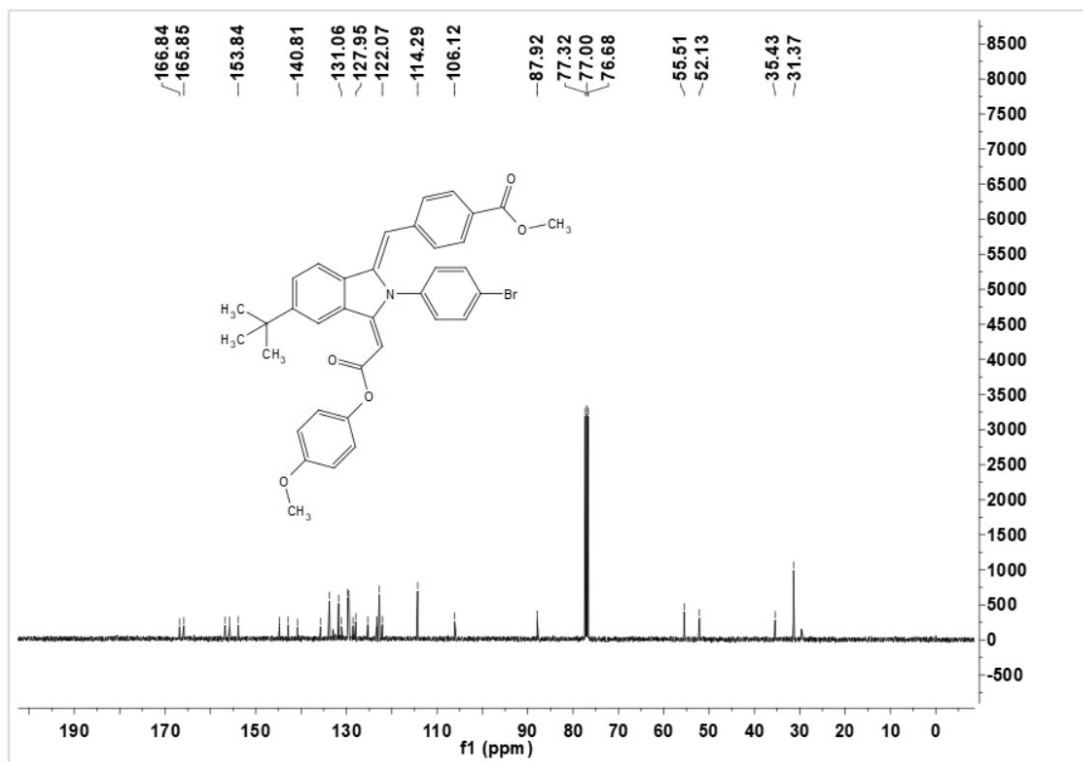

**4-Chlorophenyl 2-((*E*)-6-(*tert*-butyl)-3-((*Z*)-4-(*tert*-butyl)benzylidene)-2-(4-methoxyphenyl)isoindolin-1-ylidene)acetate (4c)**

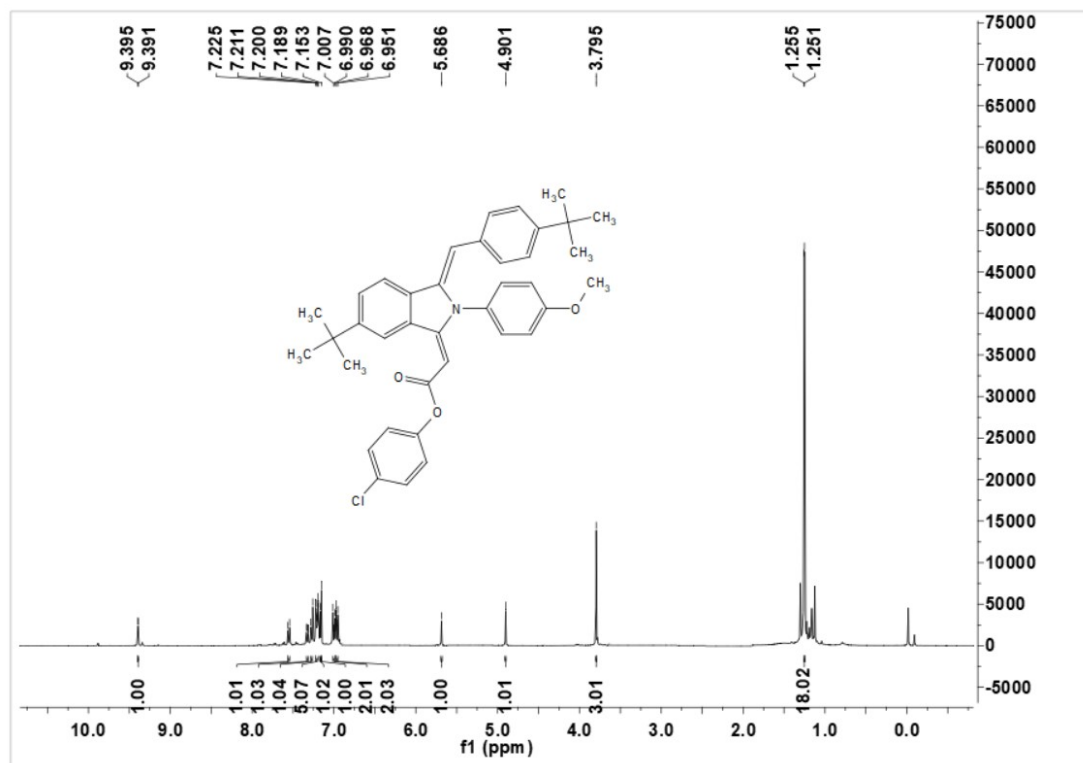

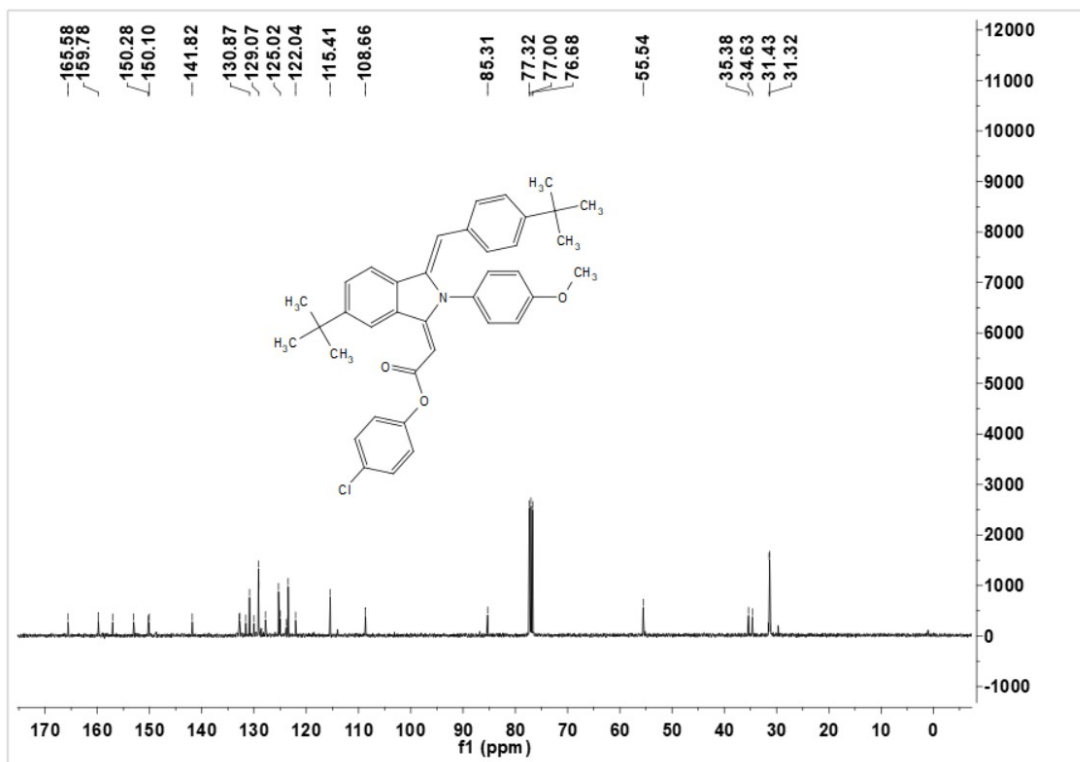

4-Chlorophenyl 2-((*E*)-6-fluoro-3-((*Z*)-4-fluorobenzylidene)-2-(4-methoxyphenyl)isoindolin-1-ylidene)acetate (4d)

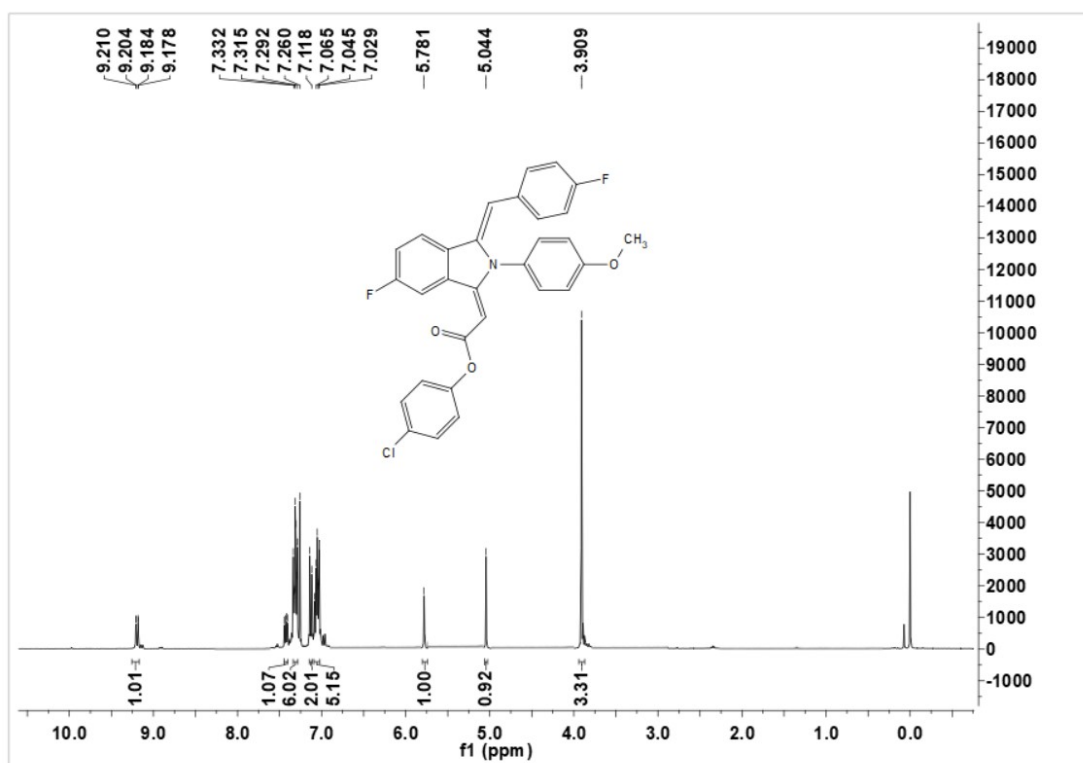

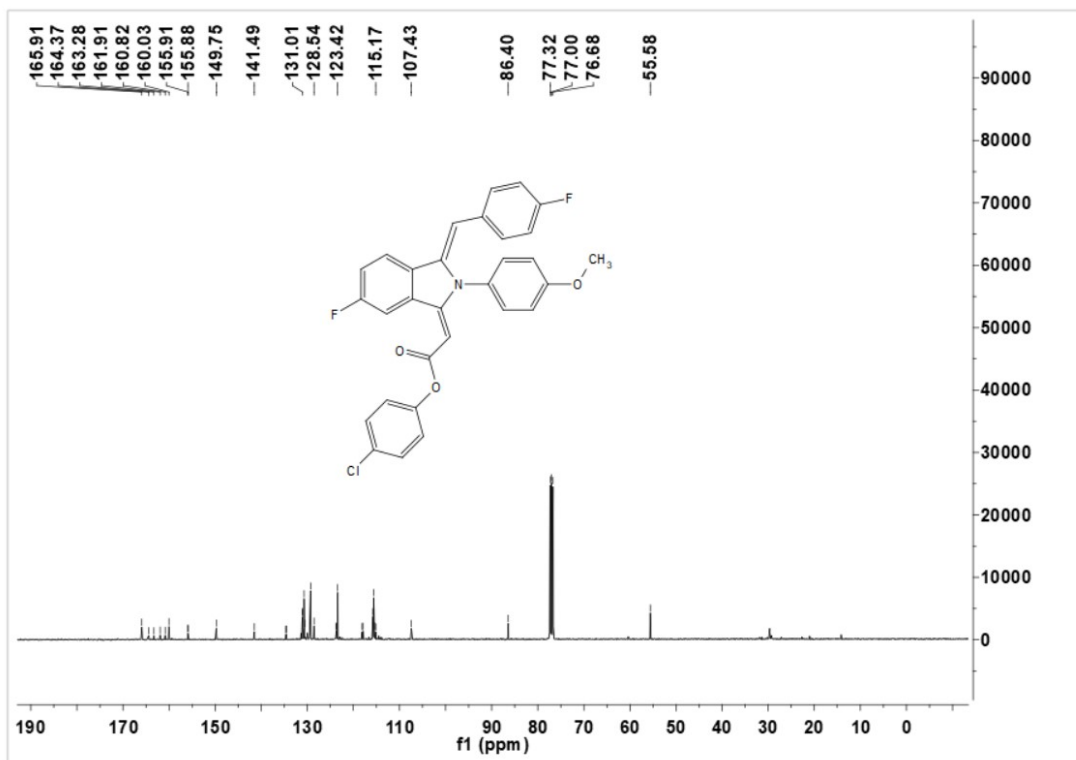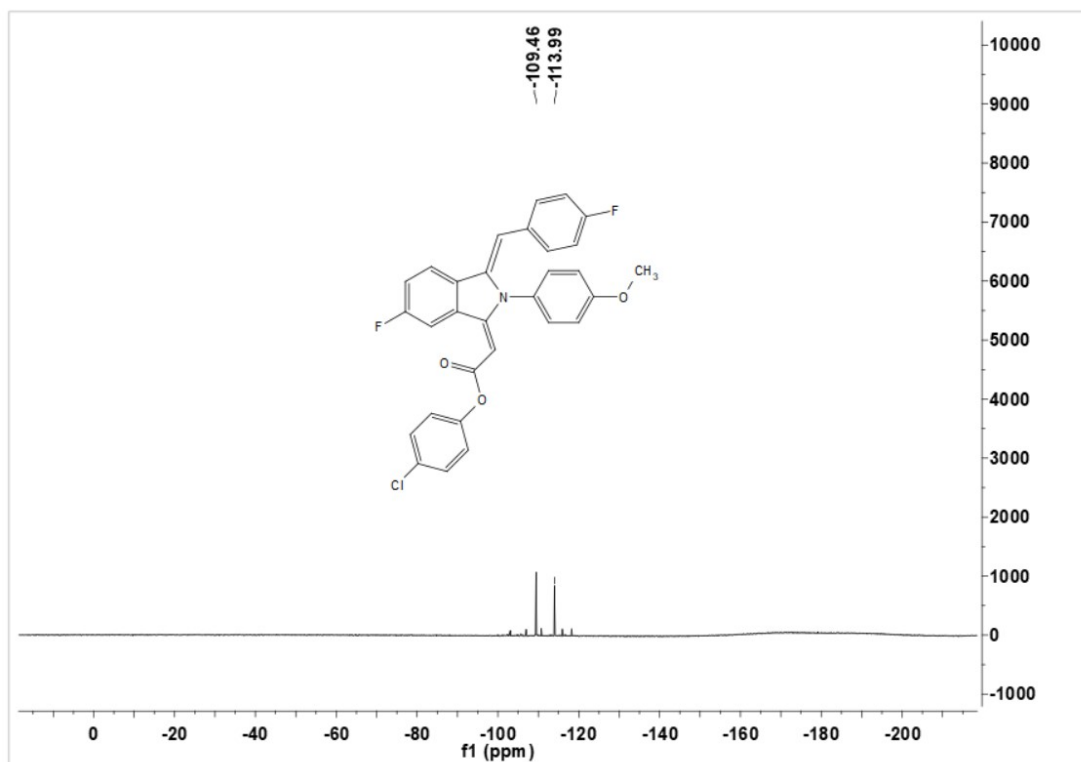

**4-Chlorophenyl 2-((*E*)-6-chloro-3-((*Z*)-4-chlorobenzylidene)-2-(4-methoxyphenyl)isoindolin-1-ylidene)acetate (4e)**

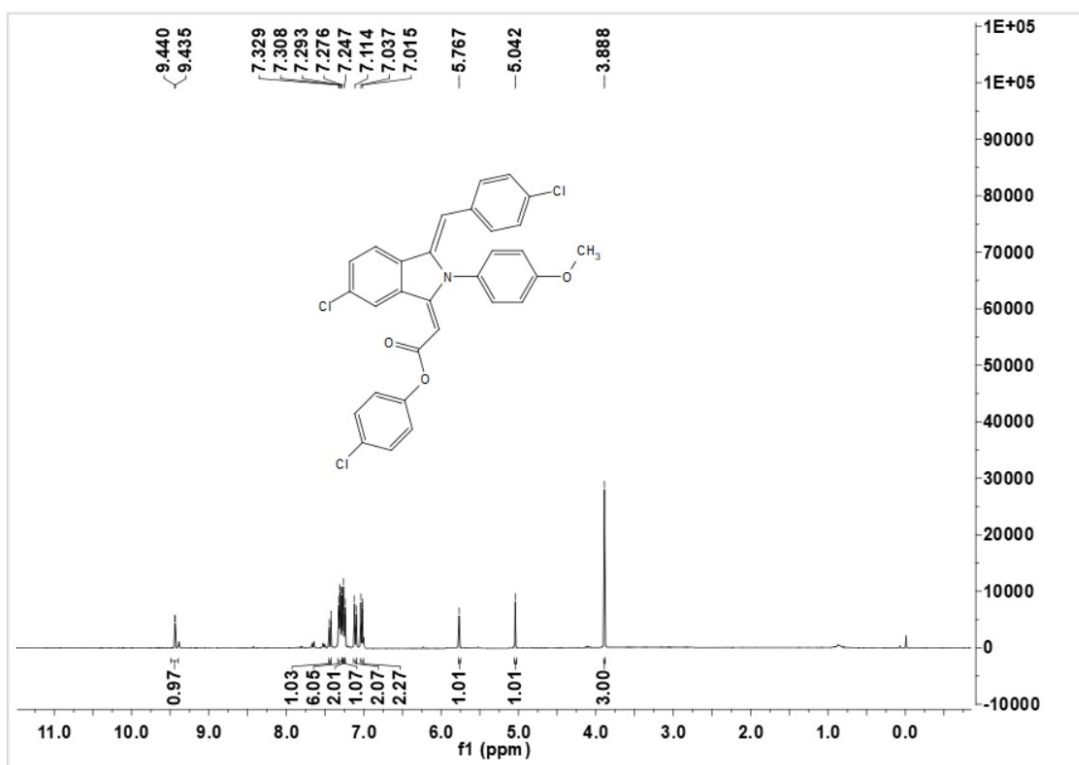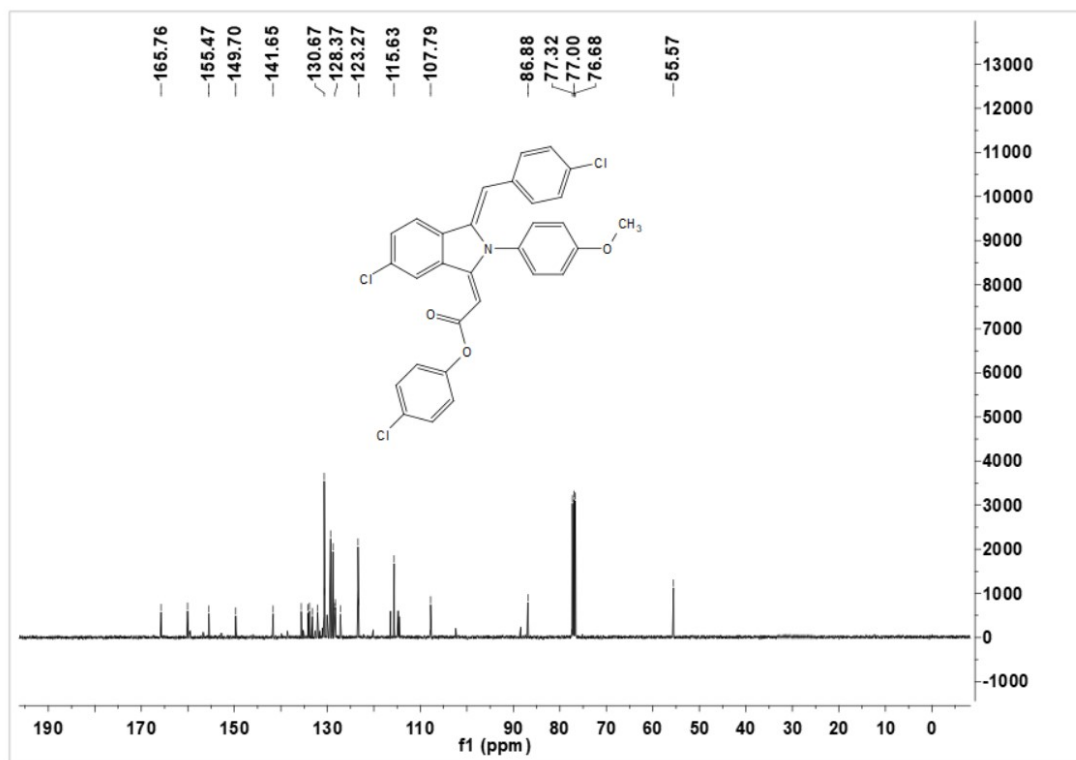

**4-Chlorophenyl 2-((*E*)-2-(4-methoxyphenyl)-6-(trifluoromethyl)-3-((*Z*)-4-(trifluoromethyl)benzylidene)isoindolin-1-ylidene)acetate (4f)**

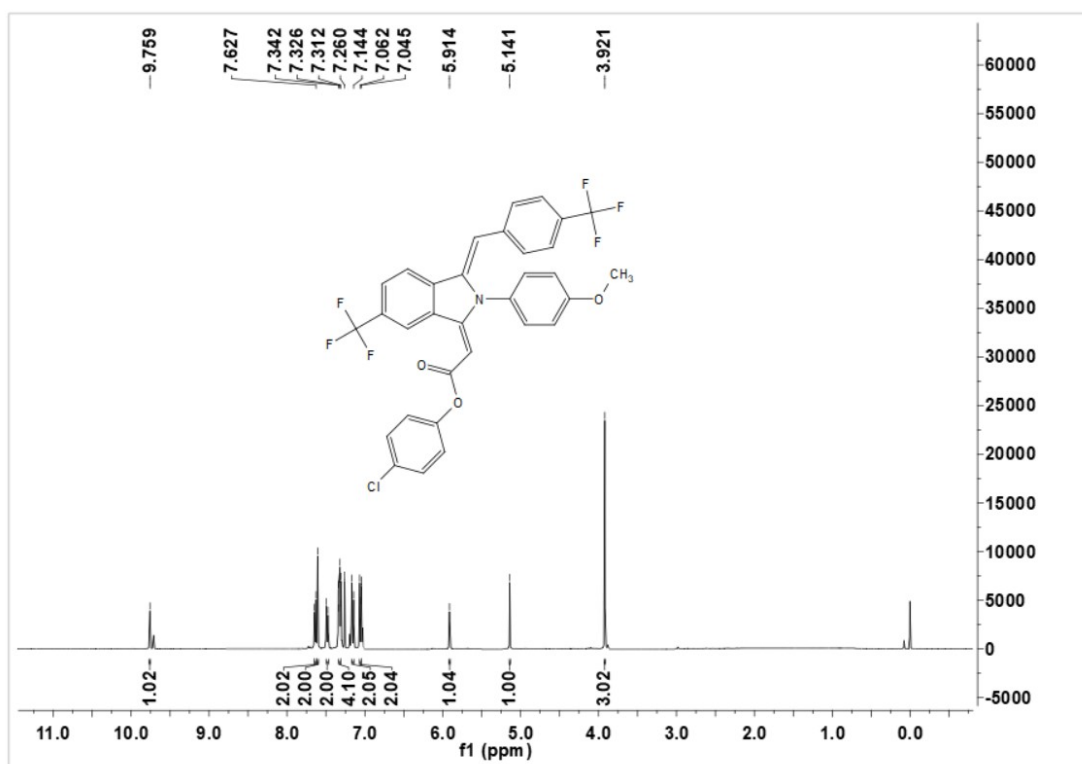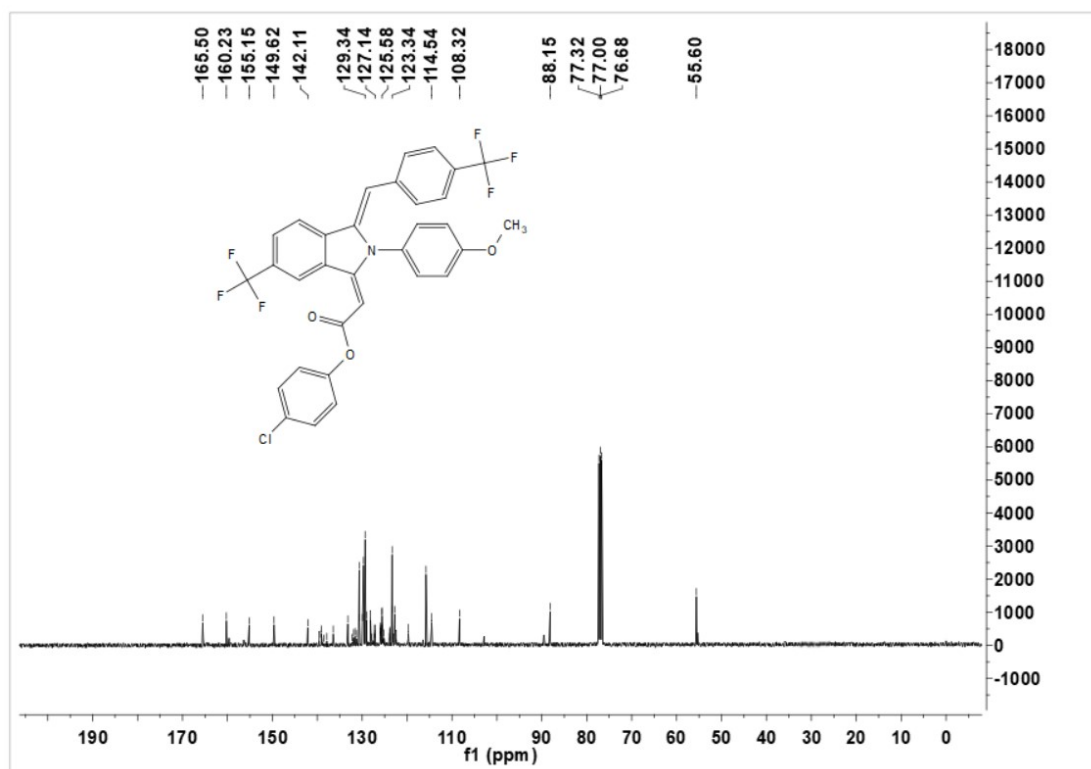

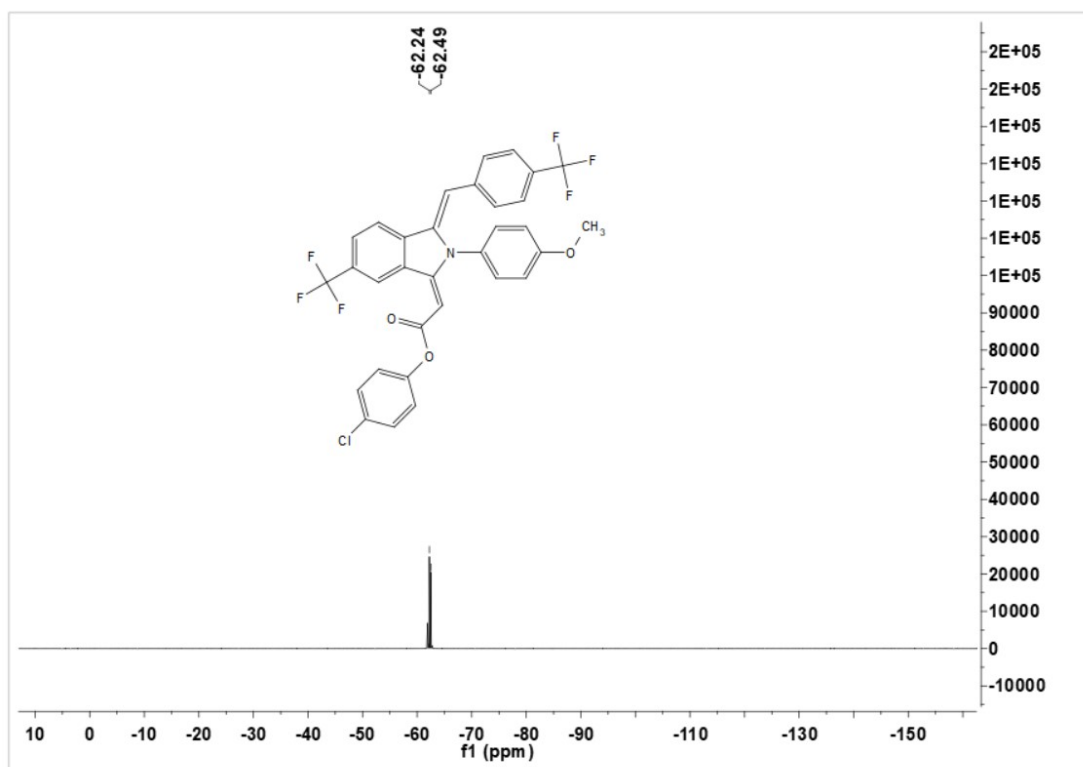

4-Chlorophenyl 2-((*E*)-2-(4-methoxyphenyl)-6-(tosyloxy)-3-((*Z*)-4-(tosyloxy)benzylidene)isoindolin-1-ylidene)acetate (4g)

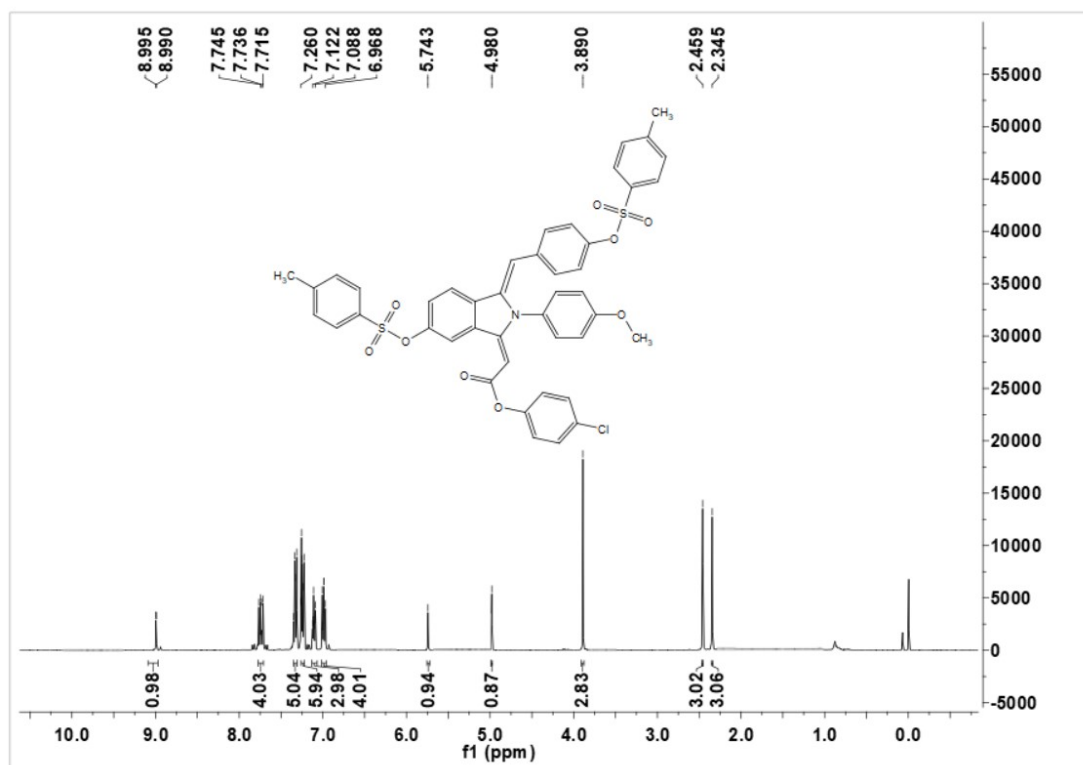

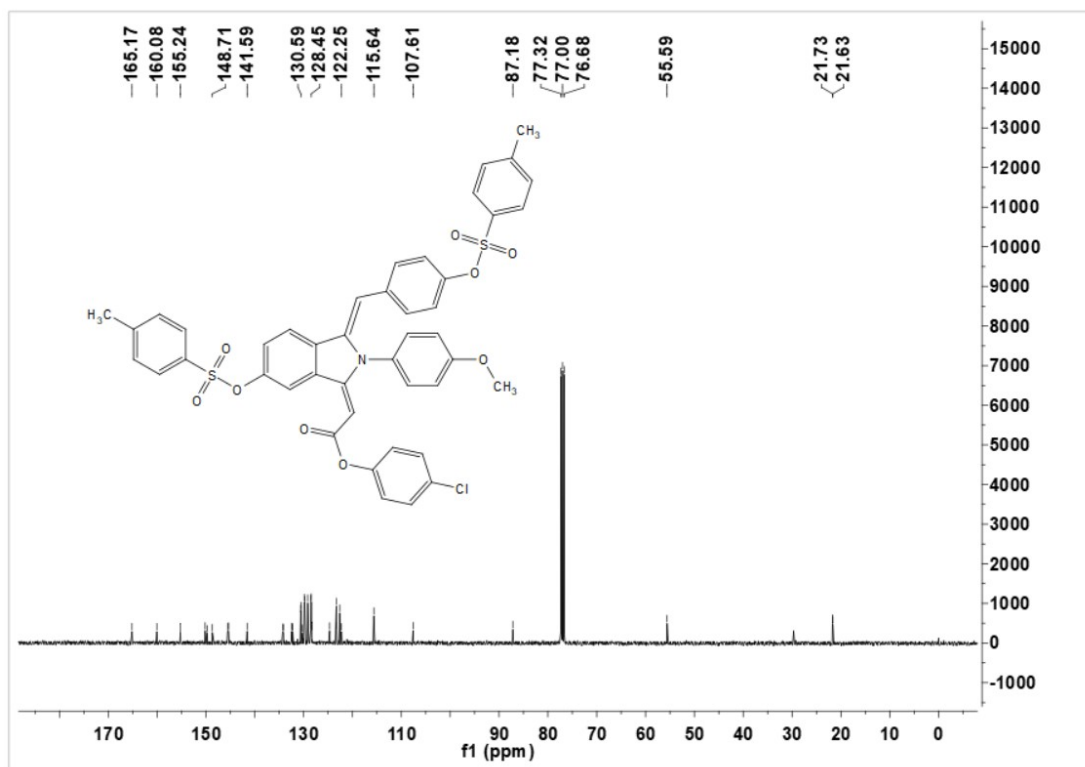

**4-Chlorophenyl 2-((*E*)-2-(4-methoxyphenyl)-6-(((4-nitrophenyl)sulfonyl)oxy)-3-((*Z*)-4-(((4-nitrophenyl)sulfonyl)oxy)benzylidene)isoindolin-1-ylidene)acetate**  
**(4h)**

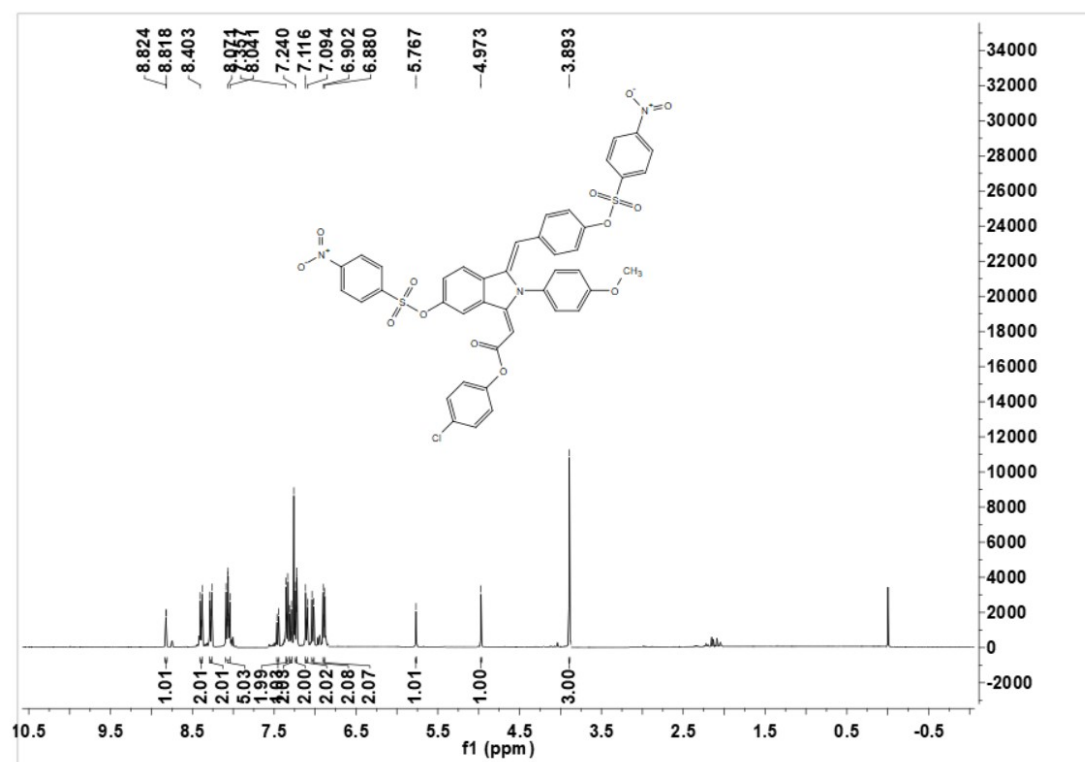

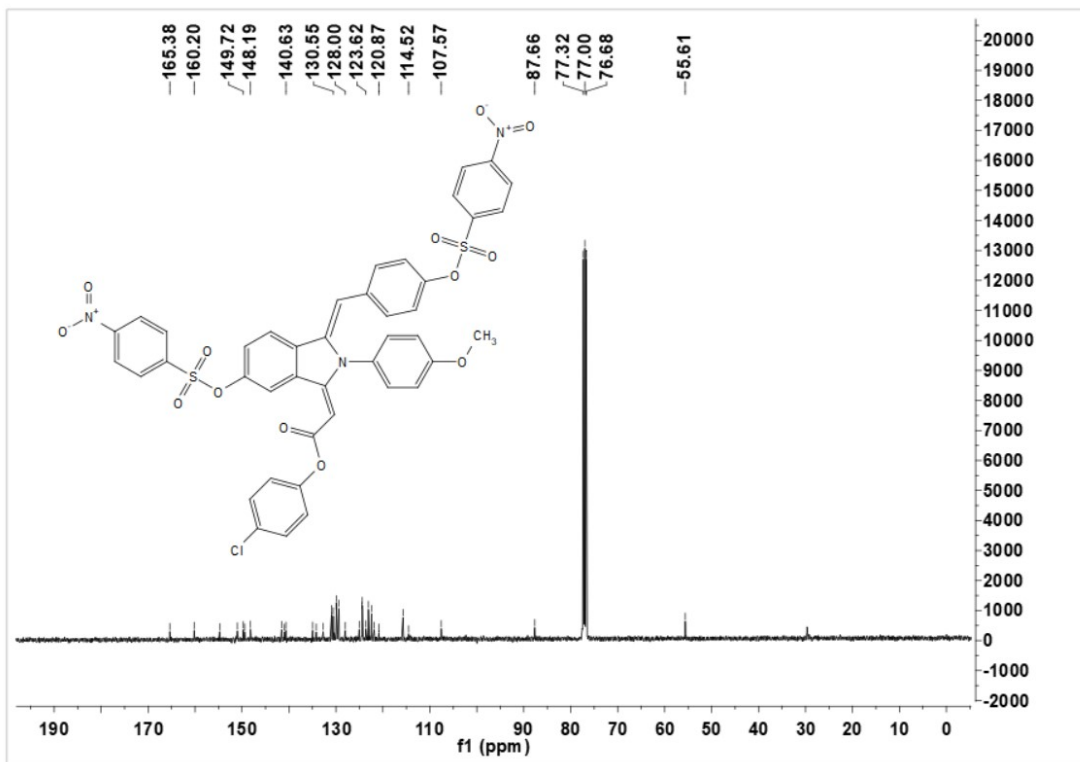

**Phenyl 2-((E)-6-(tert-butyl)-3-((Z)-4-(tert-butyl)benzylidene)-2-(4-methoxyphenyl)isoindolin-1-ylidene)acetate (4i)**

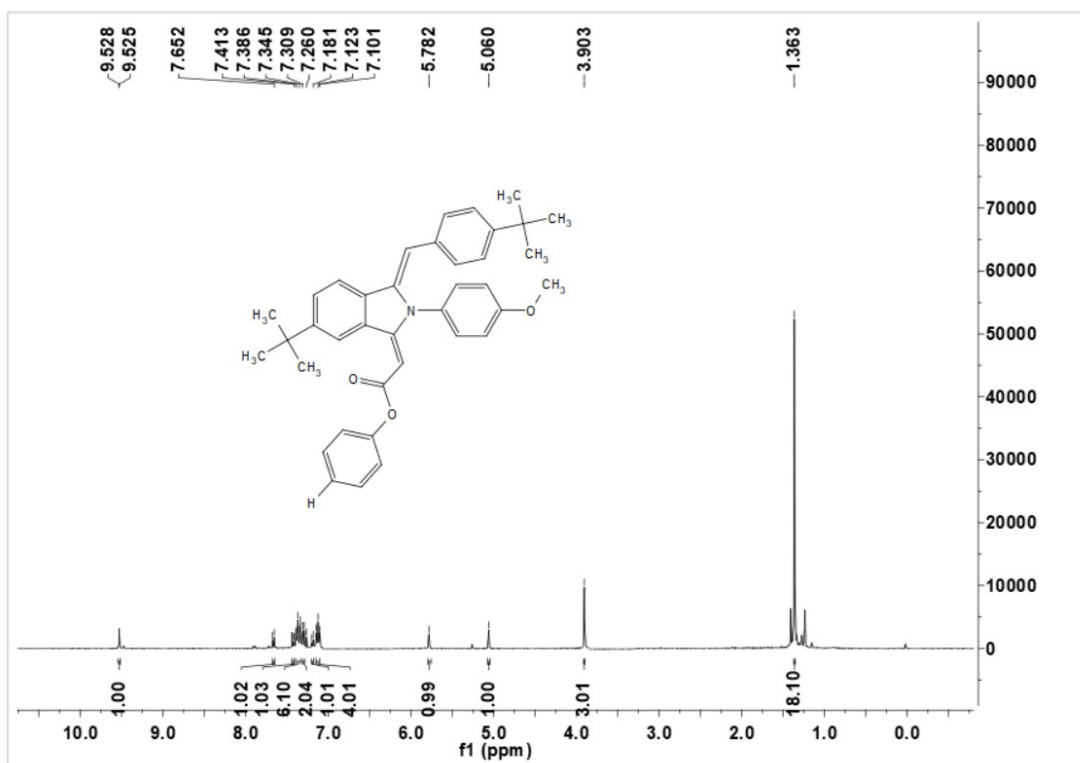



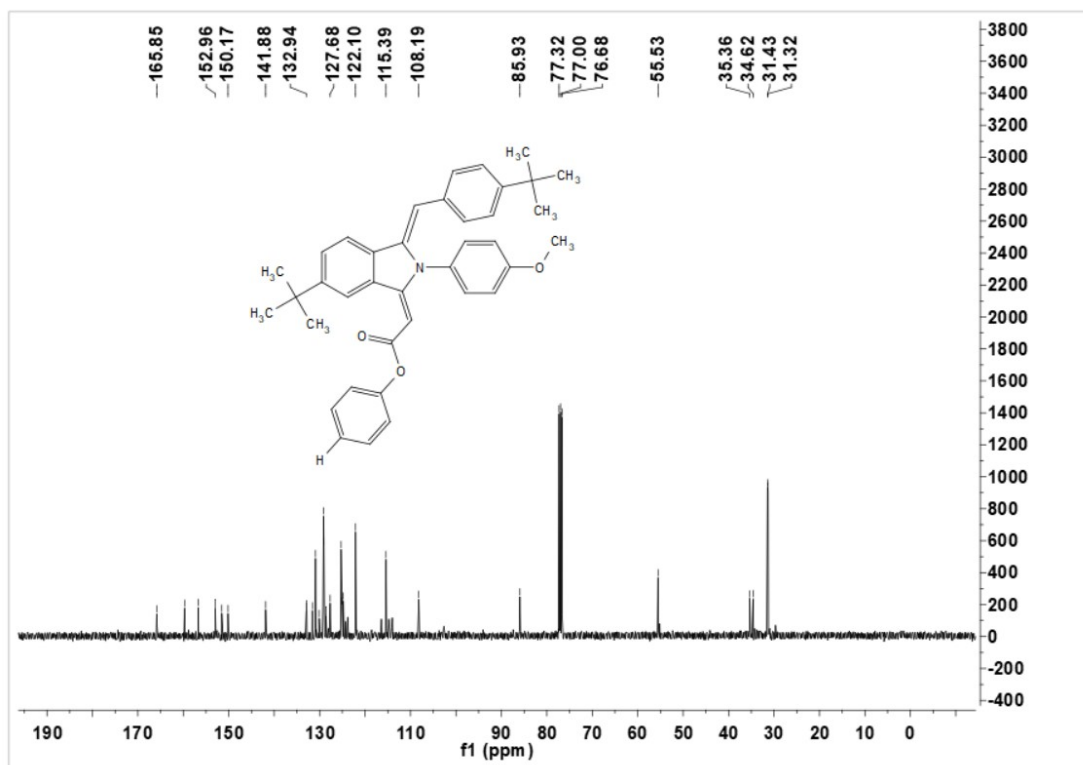

**4-Chlorophenyl 2-((*E*)-2-(4-methoxyphenyl)-6-(((4-methoxyphenyl)sulfonyl)oxy)-3-((*Z*)-4-(((4-methoxyphenyl)sulfonyl)oxy)benzylidene)isoindolin-1-ylidene)acetate (4j)**

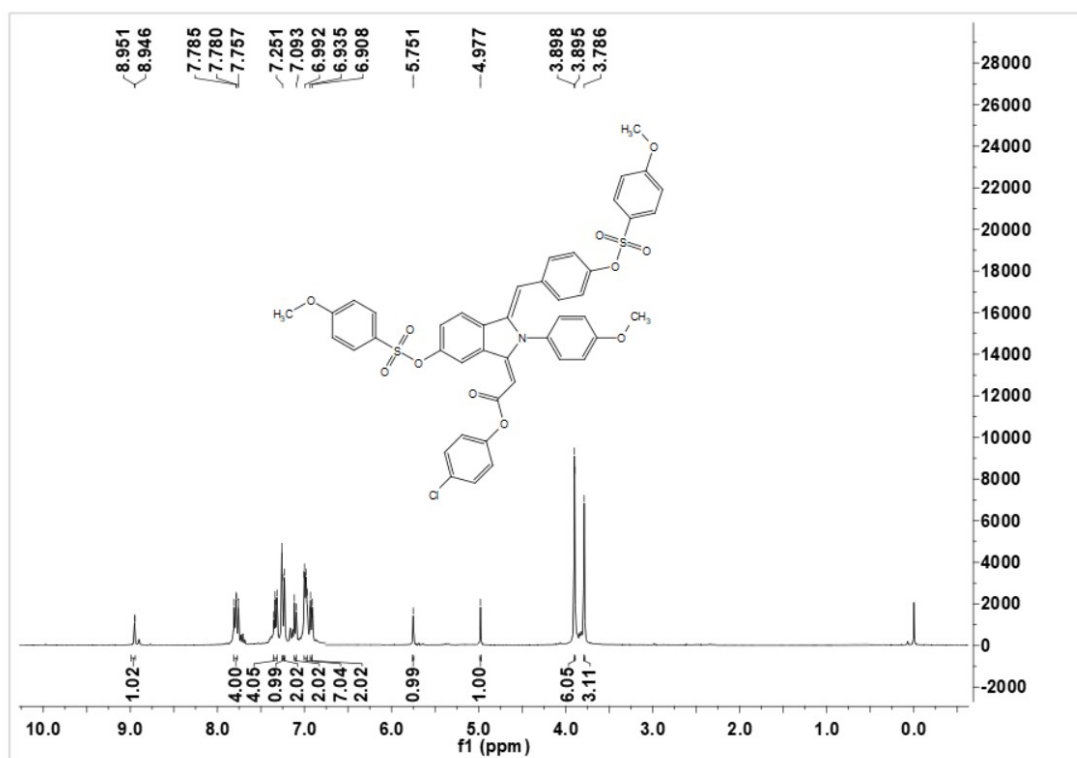

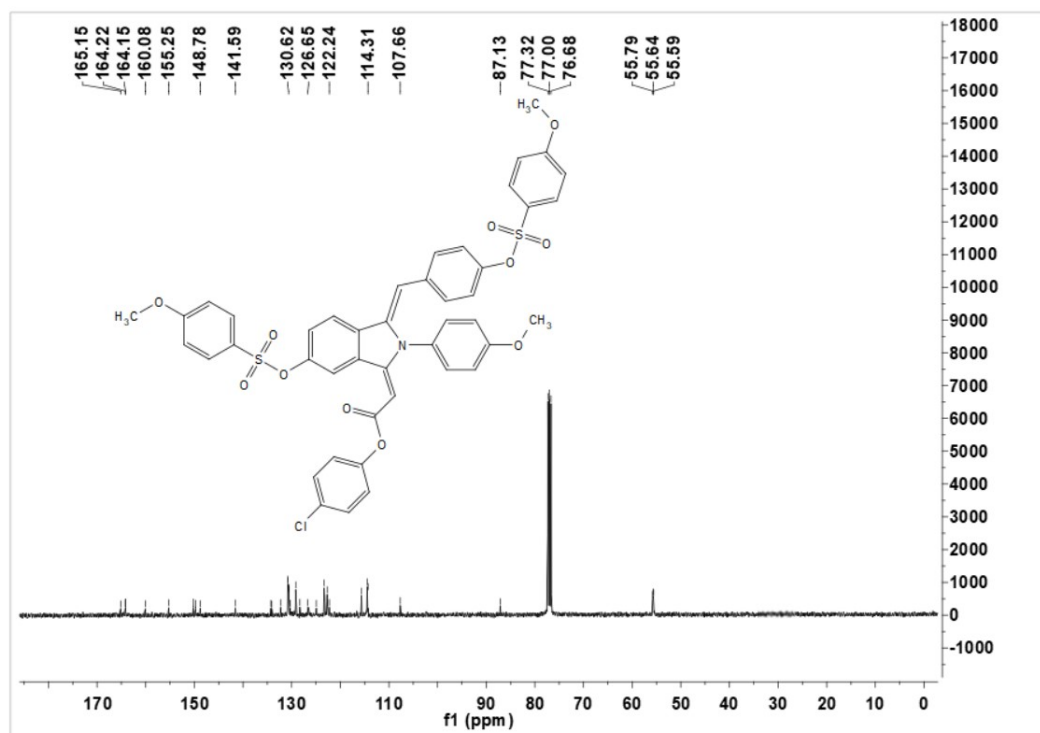

**4-Methoxyphenyl 2-((*E*)-6-(*tert*-butyl)-3-((*Z*)-4-(*tert*-butyl)benzylidene)-2-(4-(*tert*-butyl)phenyl)isoindolin-1-ylidene)acetate (4k)**

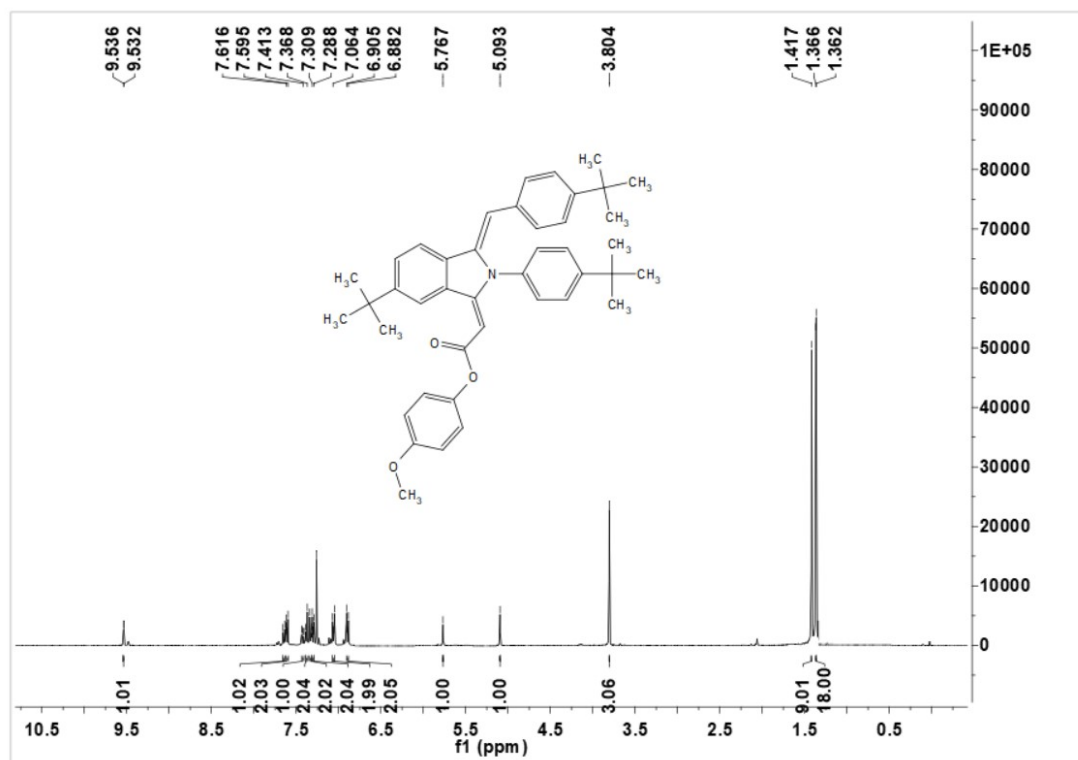

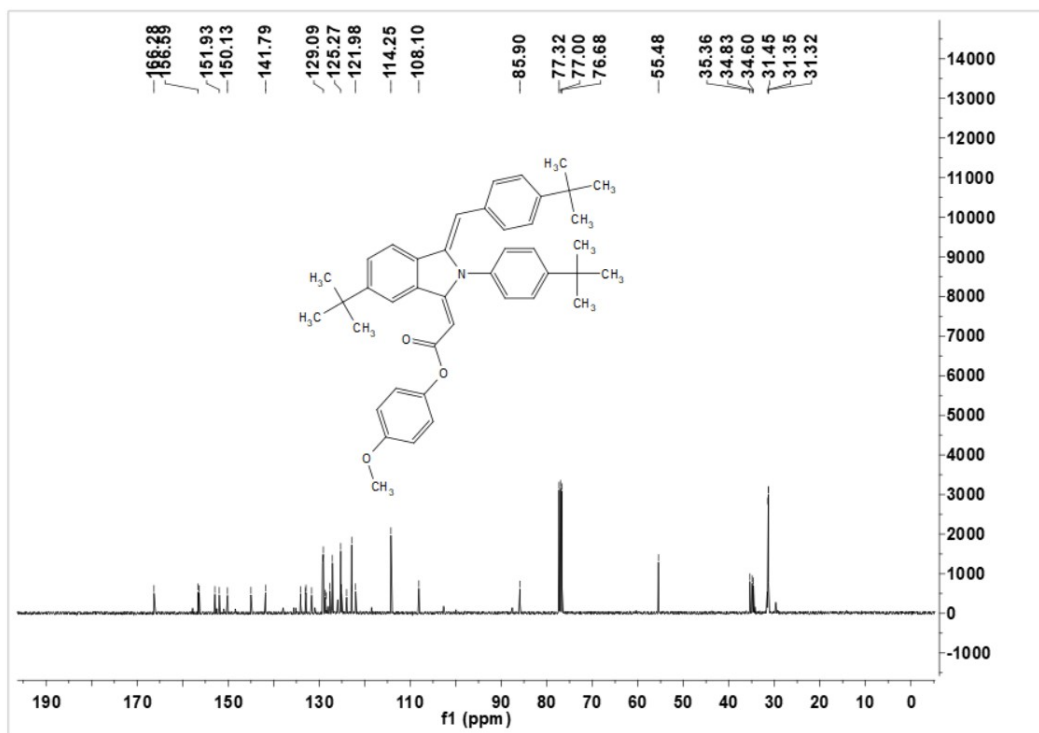

**4-Methoxyphenyl 2-((*E*)-2-(4-bromophenyl)-6-(*tert*-butyl)-3-((*Z*)-4-(*tert*-butyl)benzylidene)isoindolin-1-ylidene)acetate (4l)**

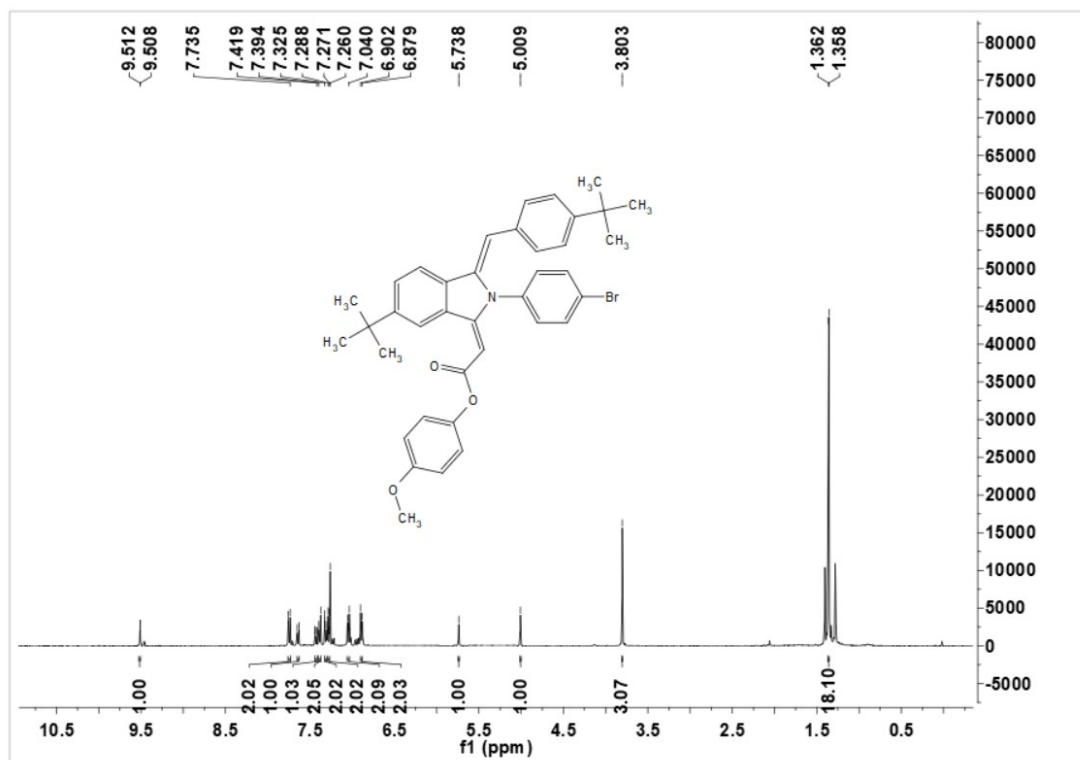

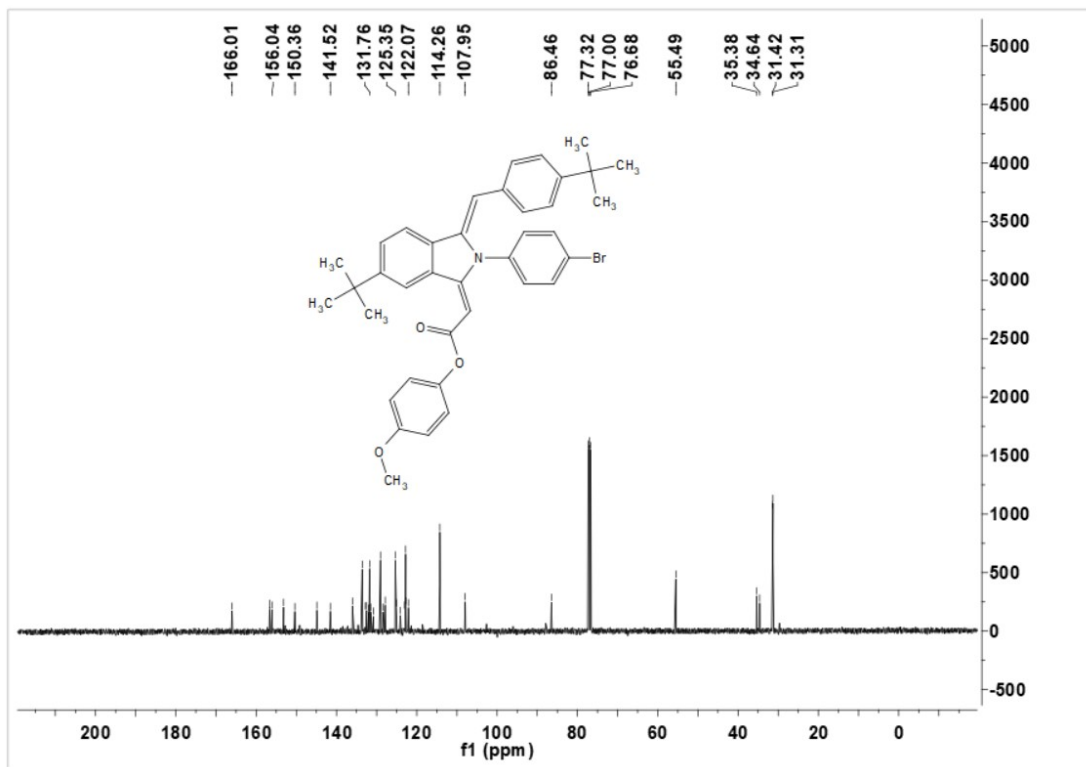

4-Methoxyphenyl 2-((*E*)-6-fluoro-3-((*Z*)-4-fluorobenzylidene)-2-(4-fluorophenyl)isoindolin-1-ylidene)acetate (4m)

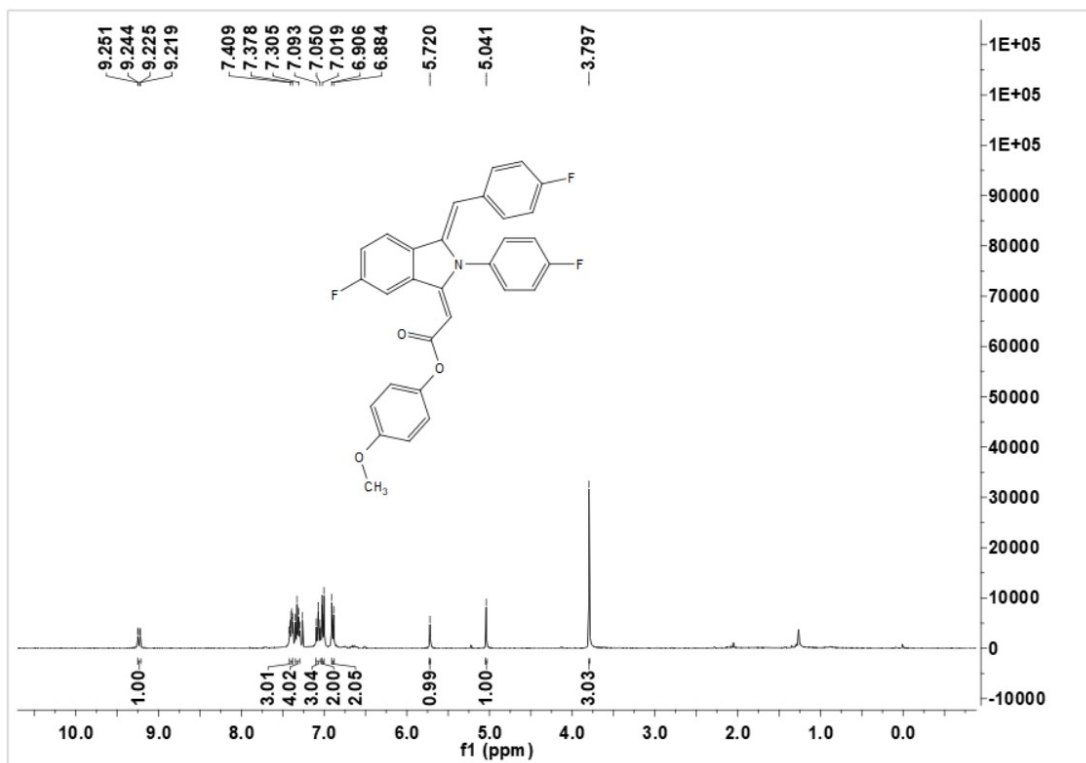

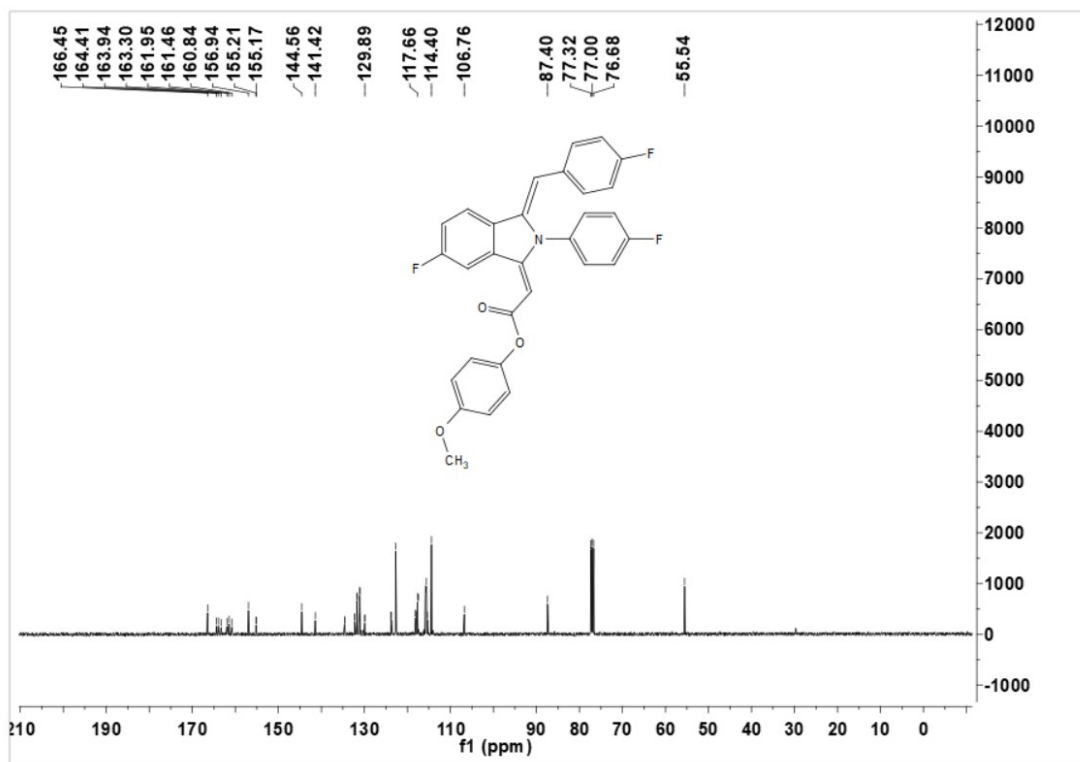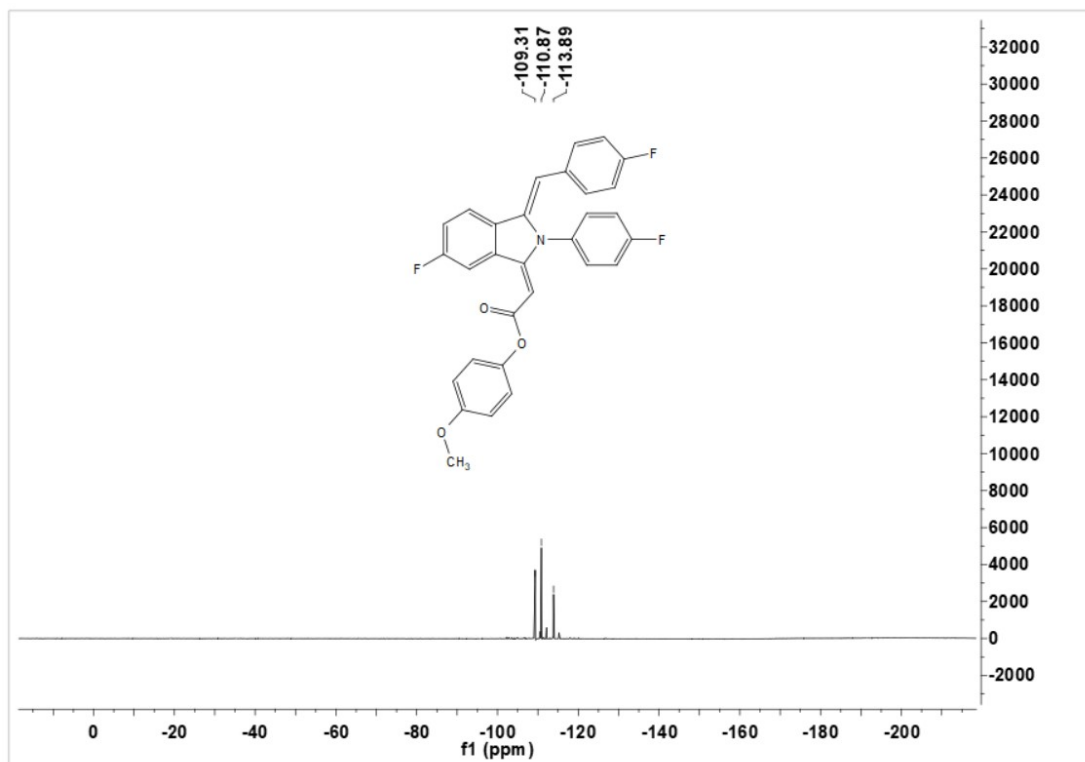

**4-Chlorophenyl 2-((*E*)-2-(4-(*tert*-butyl)phenyl)-6-(tosyloxy)-3-((*Z*)-4-(tosyloxy)benzylidene)isoindolin-1-ylidene)acetate (4n)**

SI-77

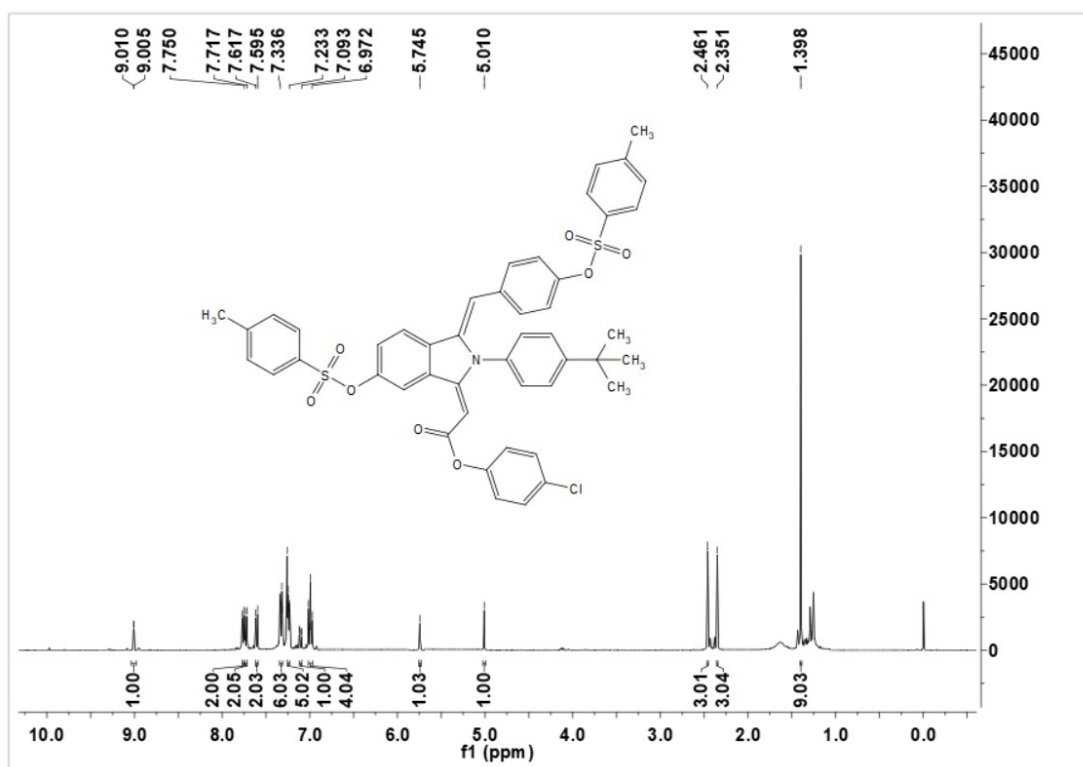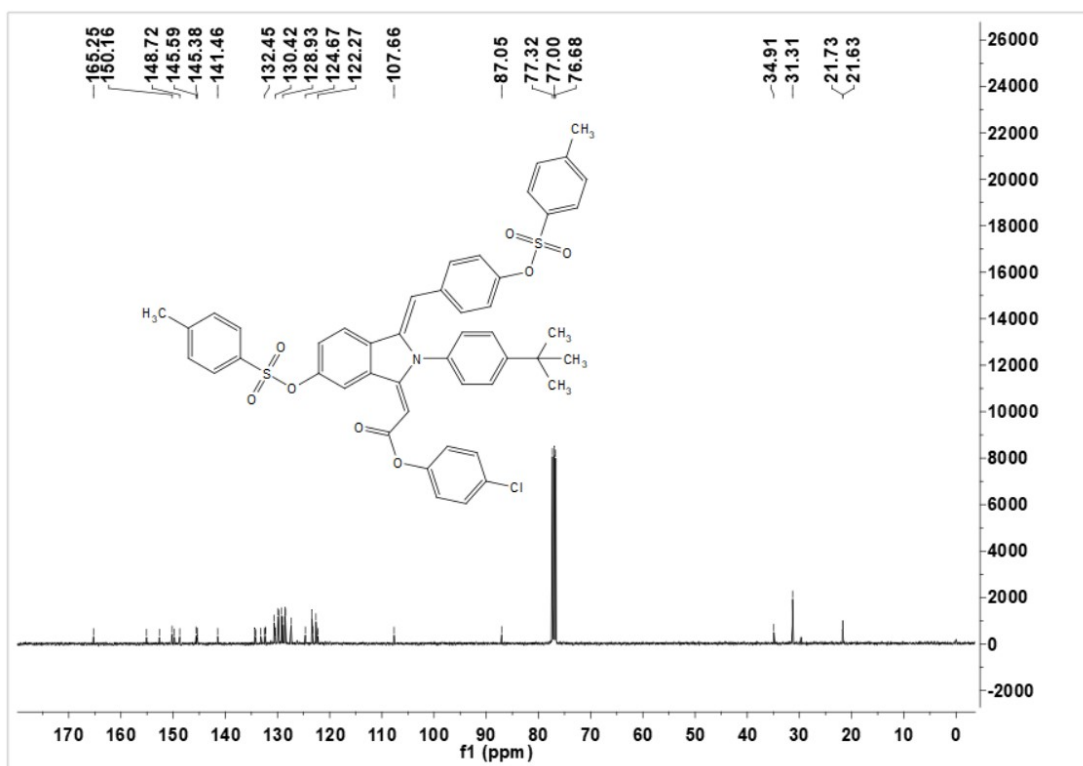

**4-Acetylphenyl 2-((*E*)-2-(4-methoxyphenyl)-6-(tosyloxy)-3-((*Z*)-4-(tosyloxy)benzylidene)isoindolin-1-ylidene)acetate (4o)**

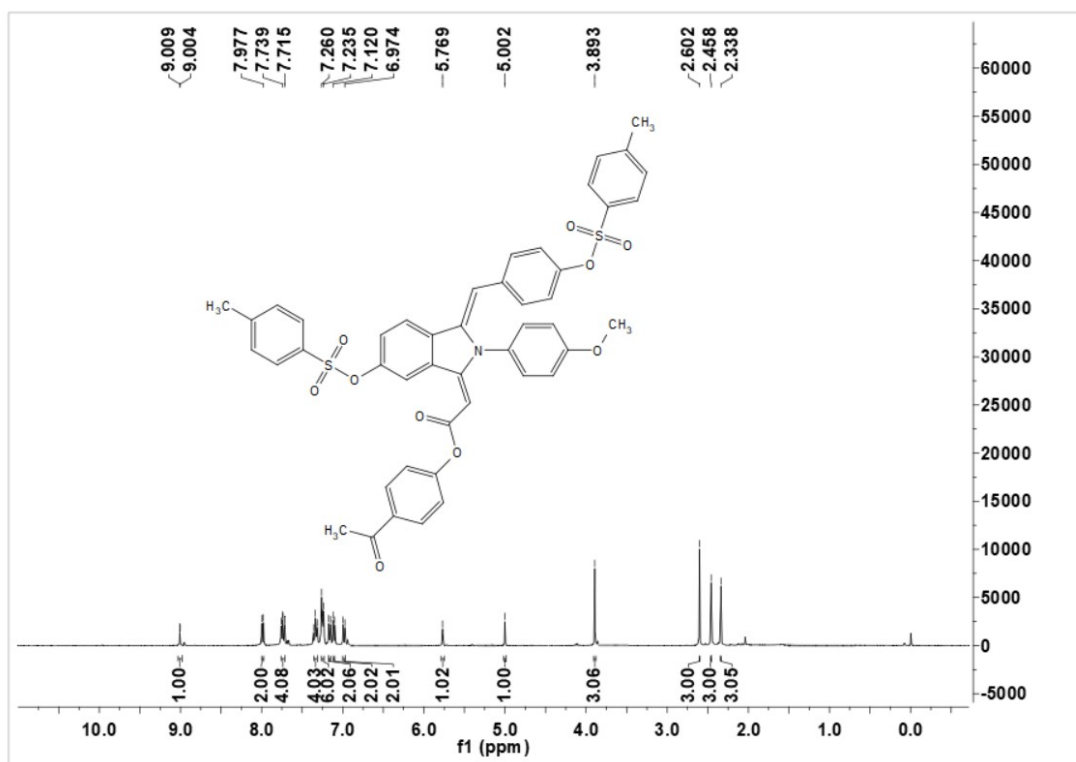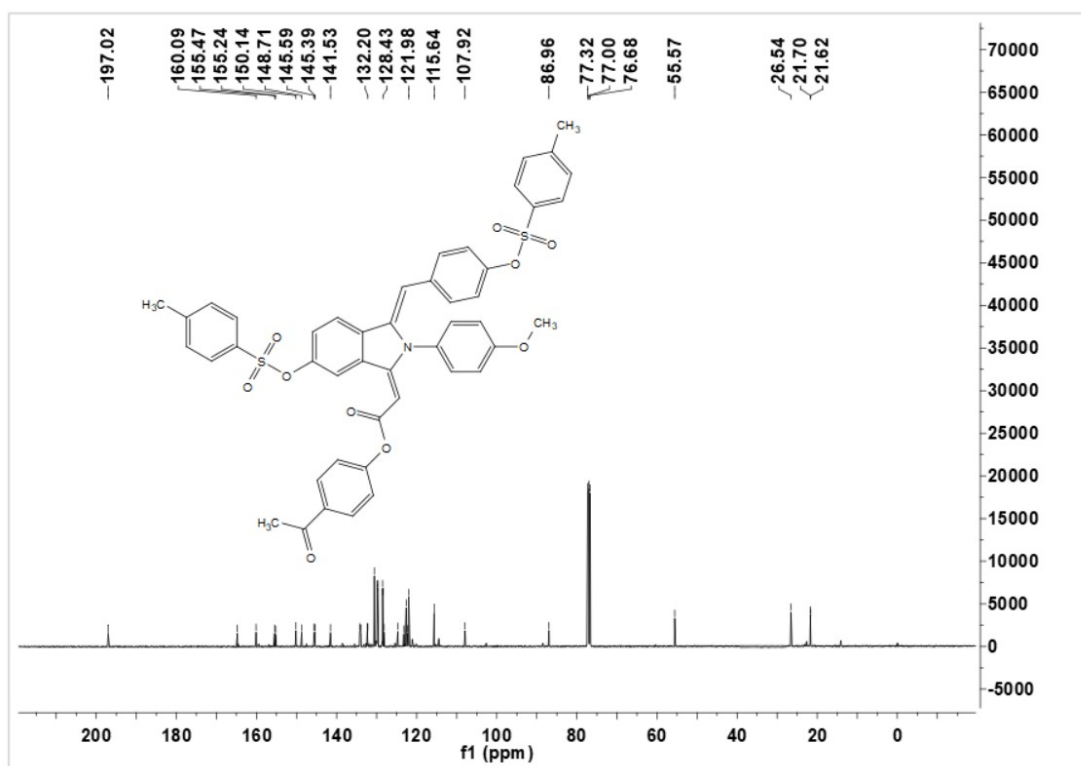

**4-Chlorophenyl 2-((*E*)-2-(4-methoxyphenyl)-6-(pyridin-2-yloxy)-3-((*Z*)-4-(pyridin-2-yloxy)benzylidene)isoindolin-1-ylidene)acetate (4p)**

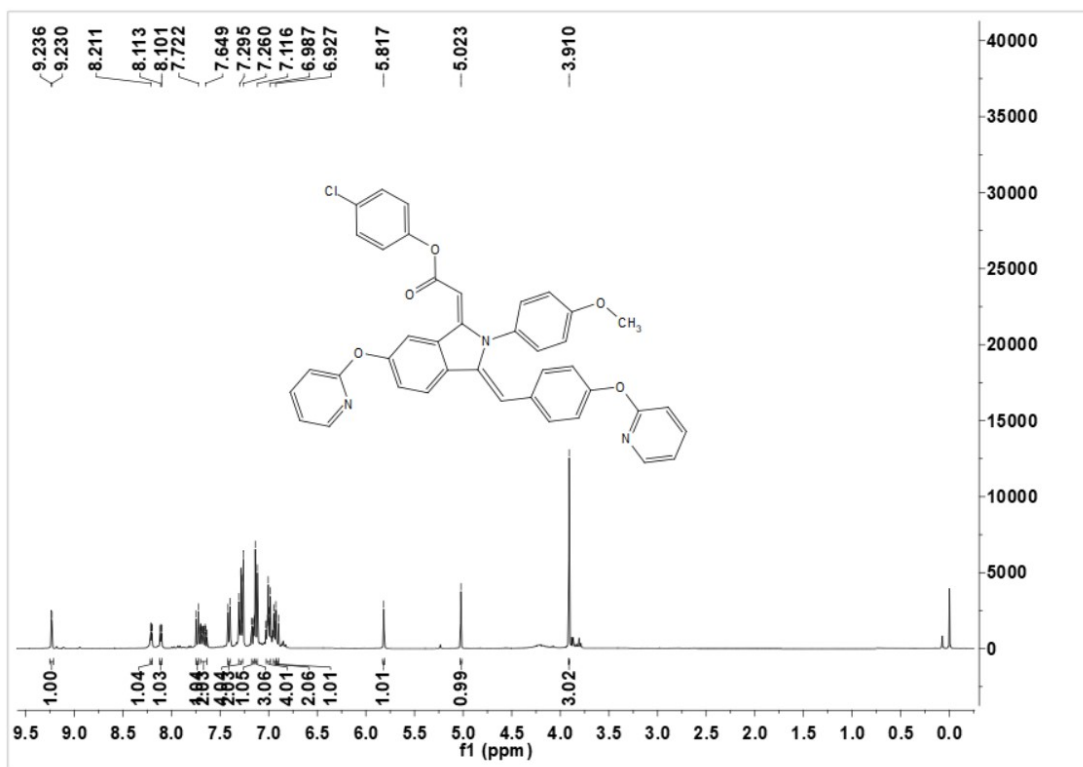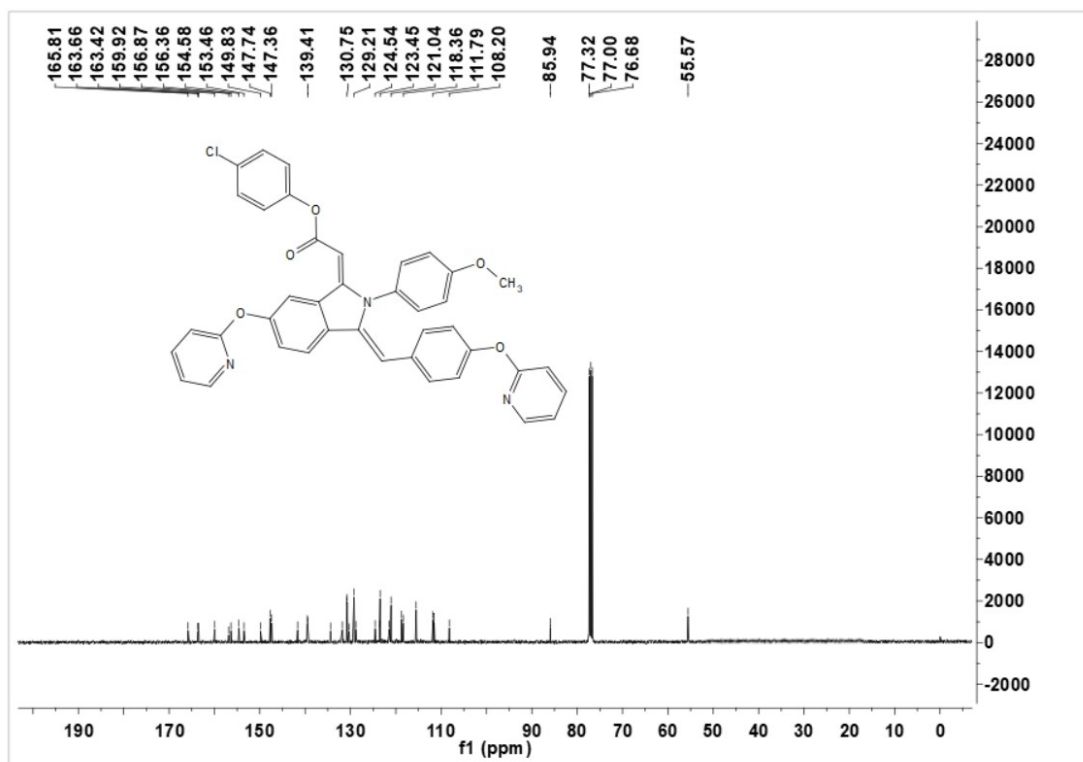



**4-Chlorophenyl 2-((*E*)-6-(*N,N*-dipropylsulfamoyl)-3-((*Z*)-4-(*N,N*-dipropylsulfamoyl)benzylidene)-2-(4-methoxyphenyl)isoindolin-1-ylidene)acetate (4q)**

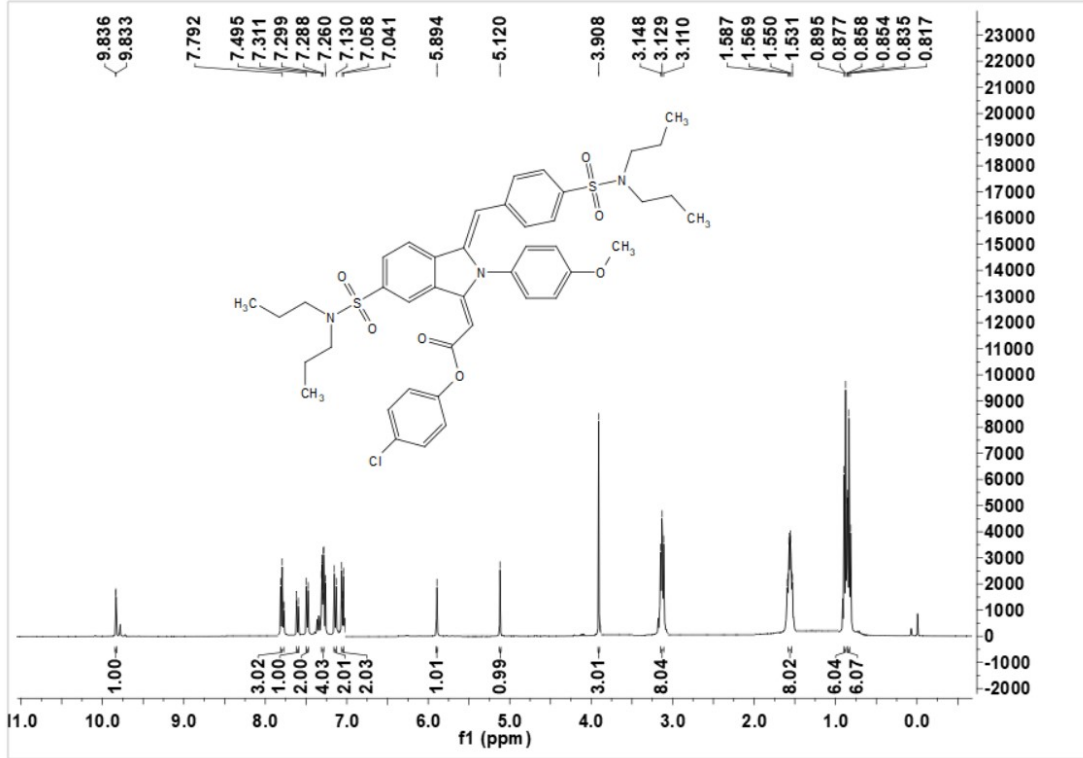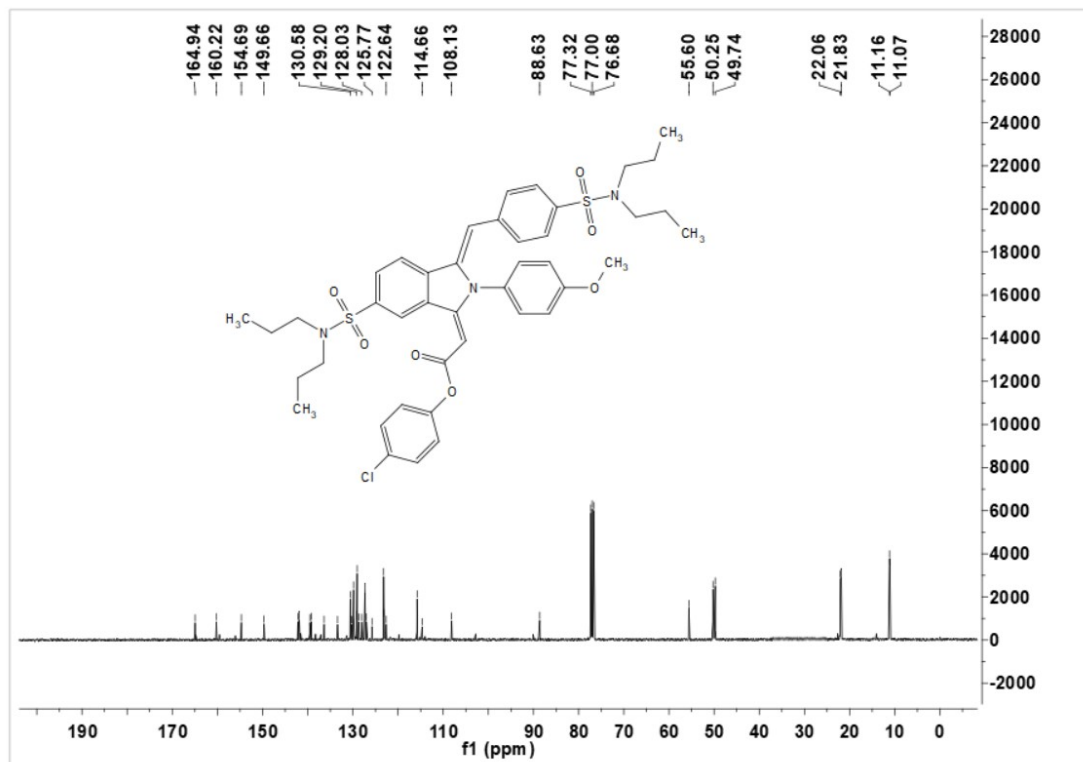

[1,1'-Biphenyl]-4-yl 2-((*E*)-6-(*N,N*-dipropylsulfamoyl)-3-((*Z*)-4-(*N,N*-dipropylsulfamoyl)benzylidene)-2-(4-methoxyphenyl)isoindolin-1-ylidene)acetate (4r)

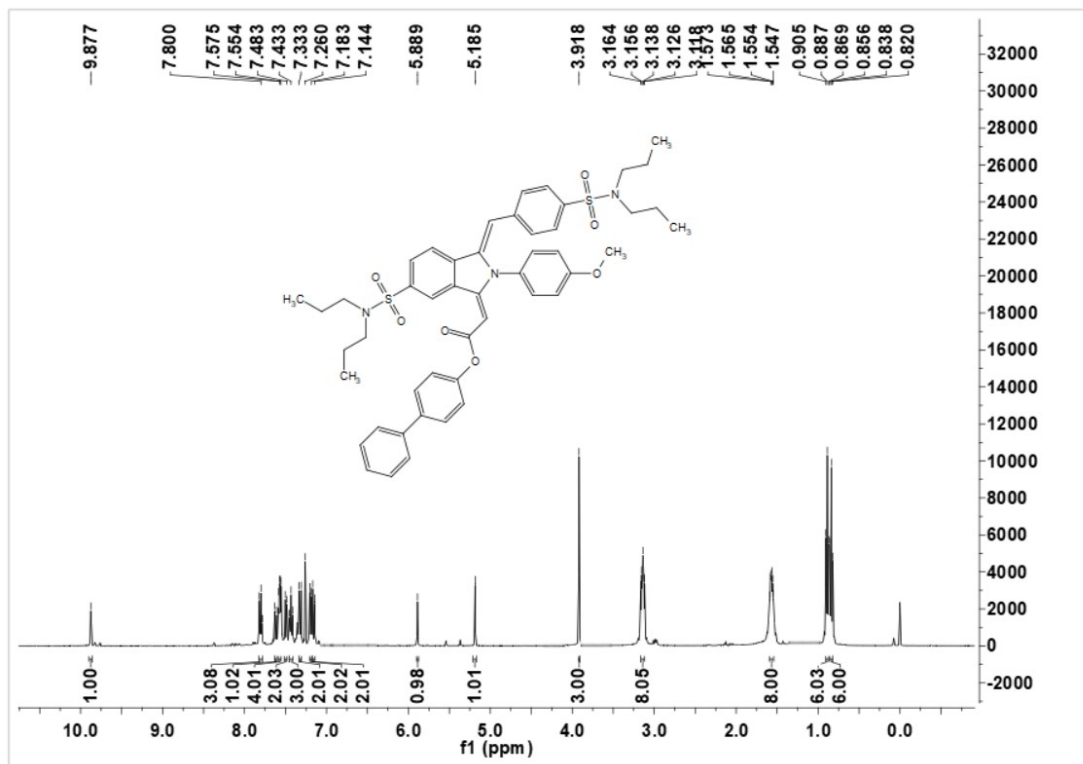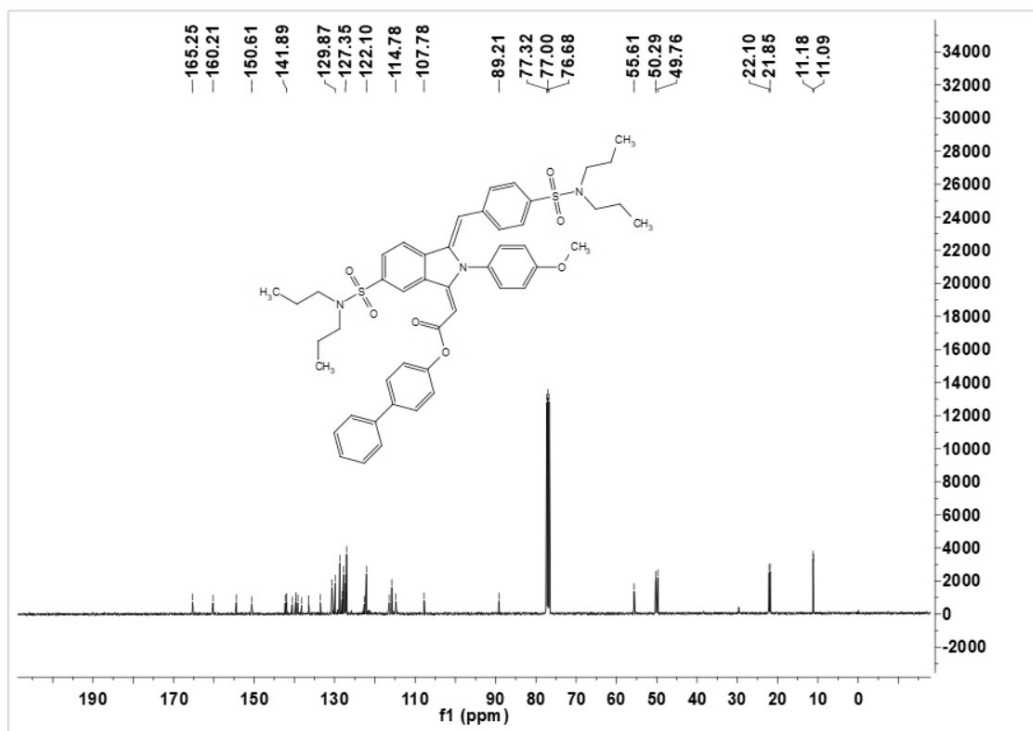

(8*R*, 9*S*, 13*S*, 14*S*)-13-Methyl-17-oxo-7,8,9,11,12,13,14,15,16,17-decahydro-6*H*-cyclopenta[*a*]phenanthren-3-yl 2-((*E*)-6-(*N,N*-dipropylsulfamoyl)-3-((*Z*)-4-(*N,N*-dipropylsulfamoyl)benzylidene)-2-(4-methoxyphenyl)isoindolin-1-ylidene)acetate (4*s*)

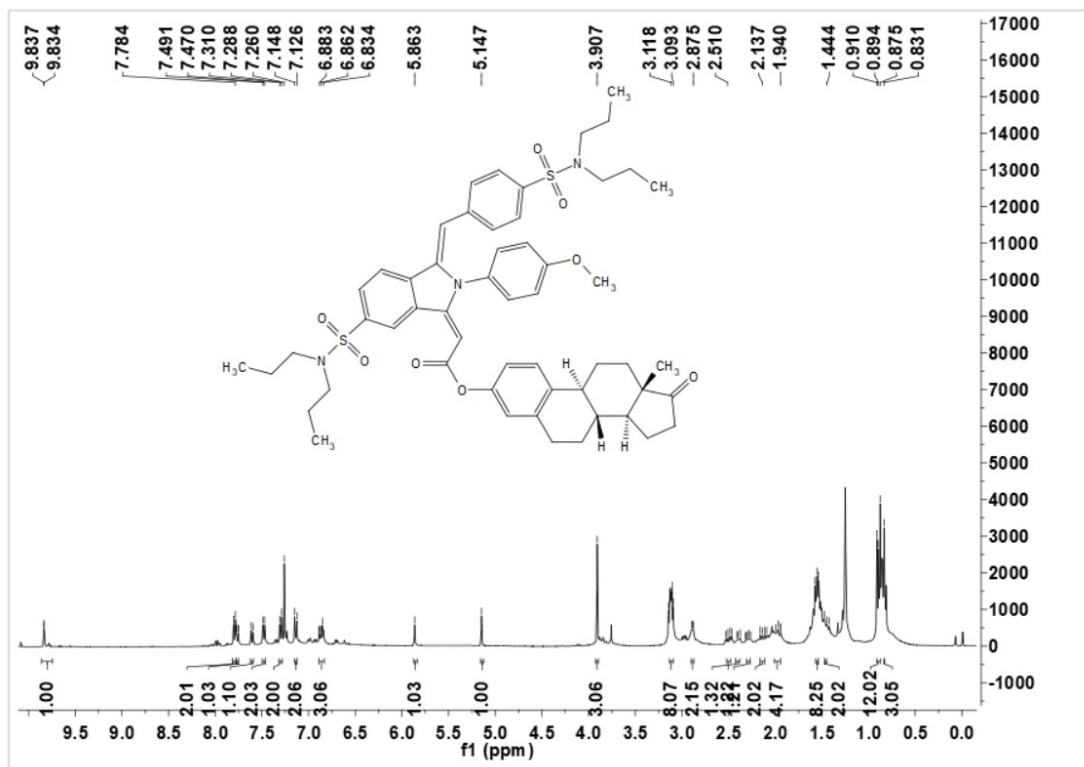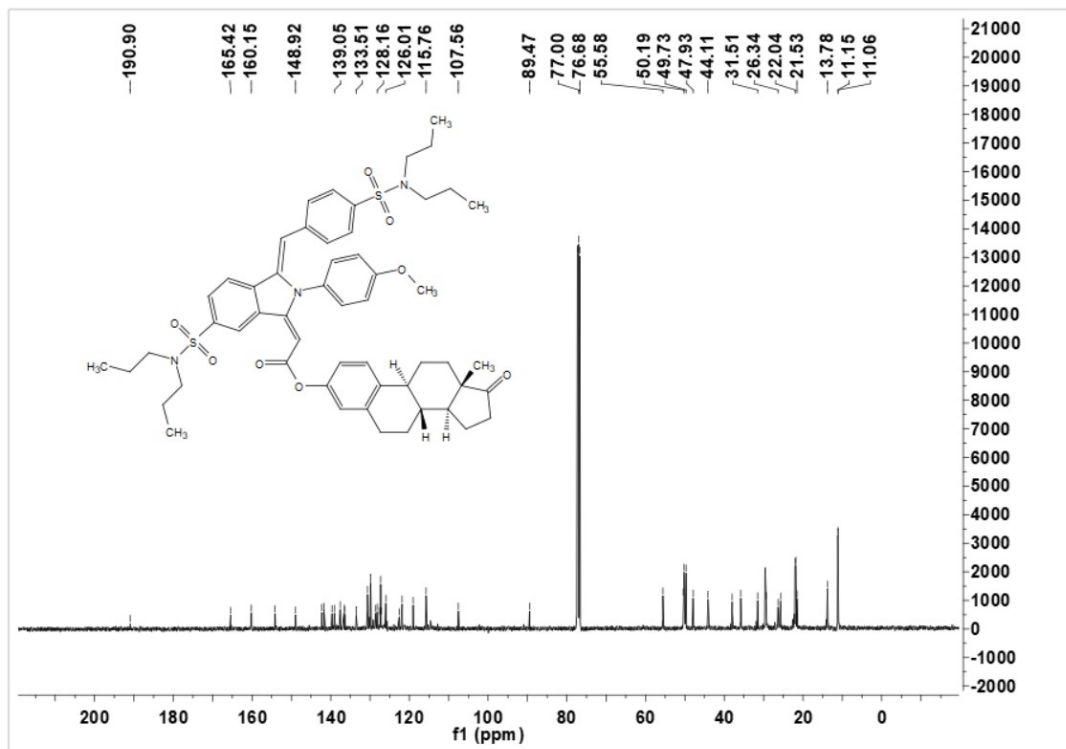

4-(1-(2-(2,4-Dinitrophenyl)hydrazineylidene)ethyl)phenyl 2-((E)-2-(4-methoxyphenyl)-6-(tosyloxy)-3-((Z)-4-(tosyloxy)benzylidene)isoindolin-1-ylidene)acetate (4t)

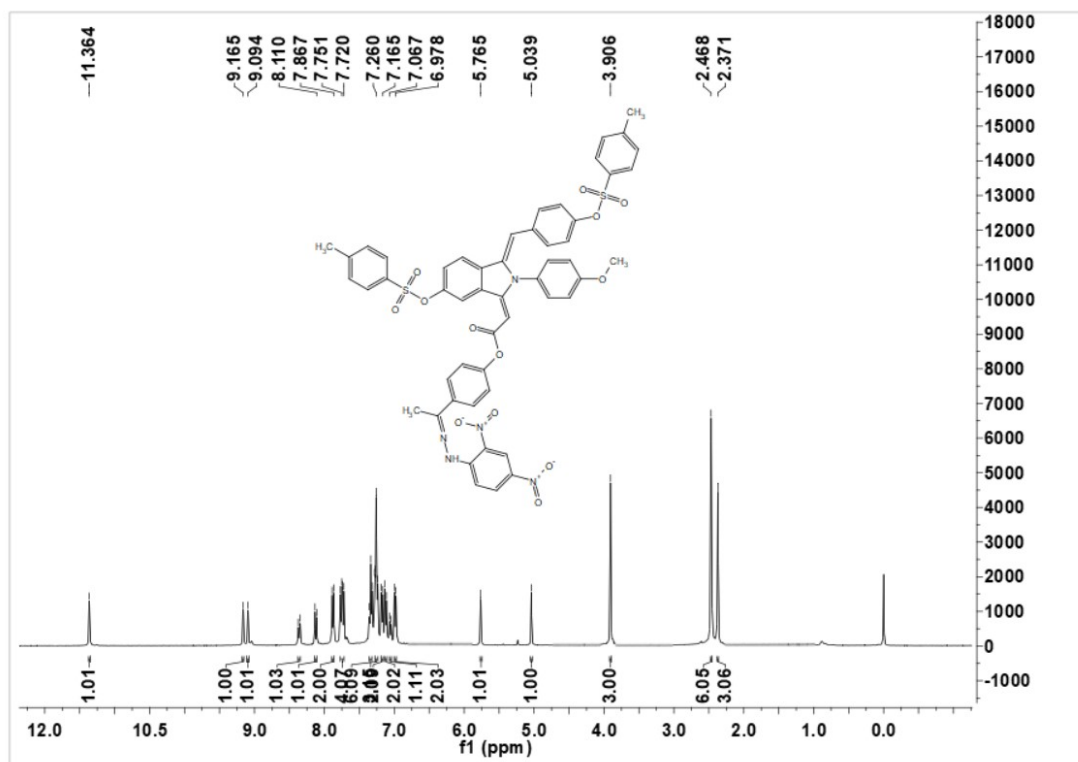

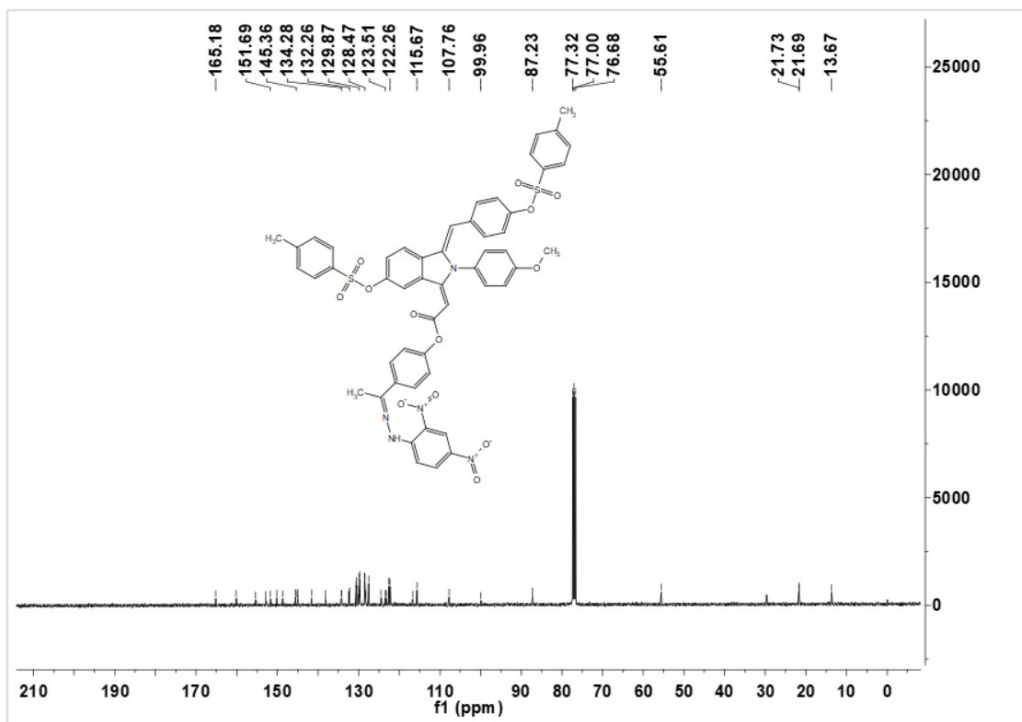

**Methyl (E)-3-(1-(2-methoxy-2-oxoethyl)-2-(4-methoxyphenyl)-6-(tosyloxy)-2H-isoindol-4-yl)acrylate (6a)**

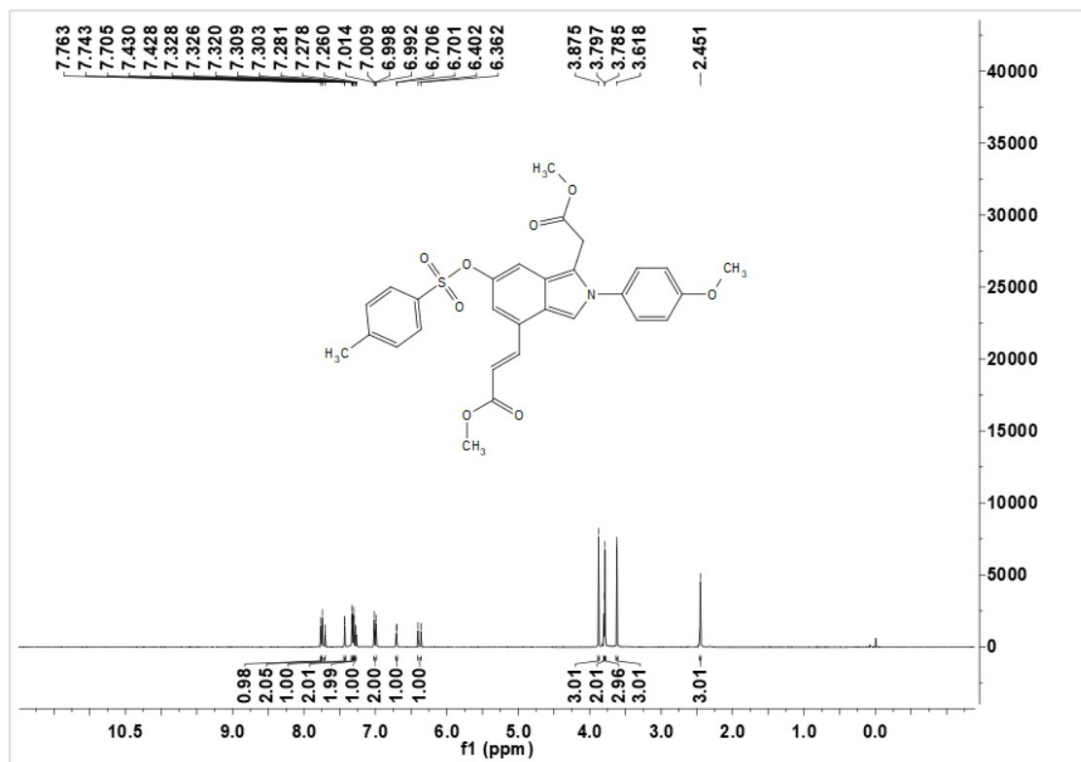

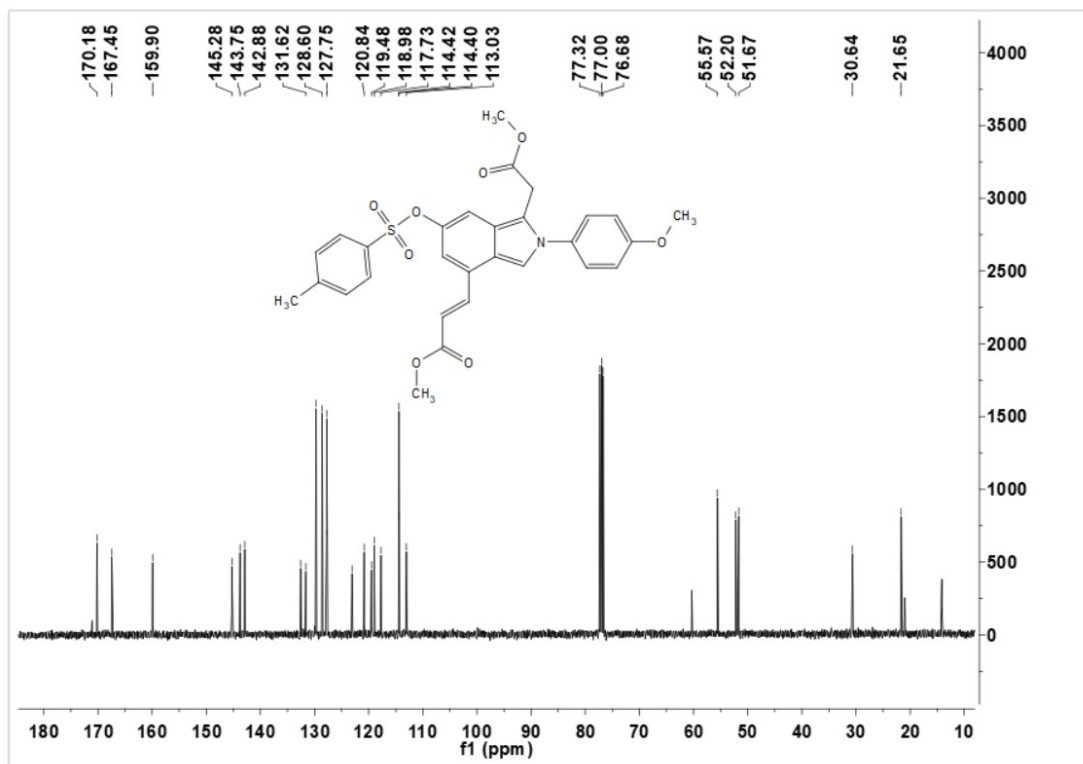

**Ethyl (E)-3-(1-(2-ethoxy-2-oxoethyl)-2-(4-methoxyphenyl)-6-(tosyloxy)-2H-isoindol-4-yl)acrylate (6b)**

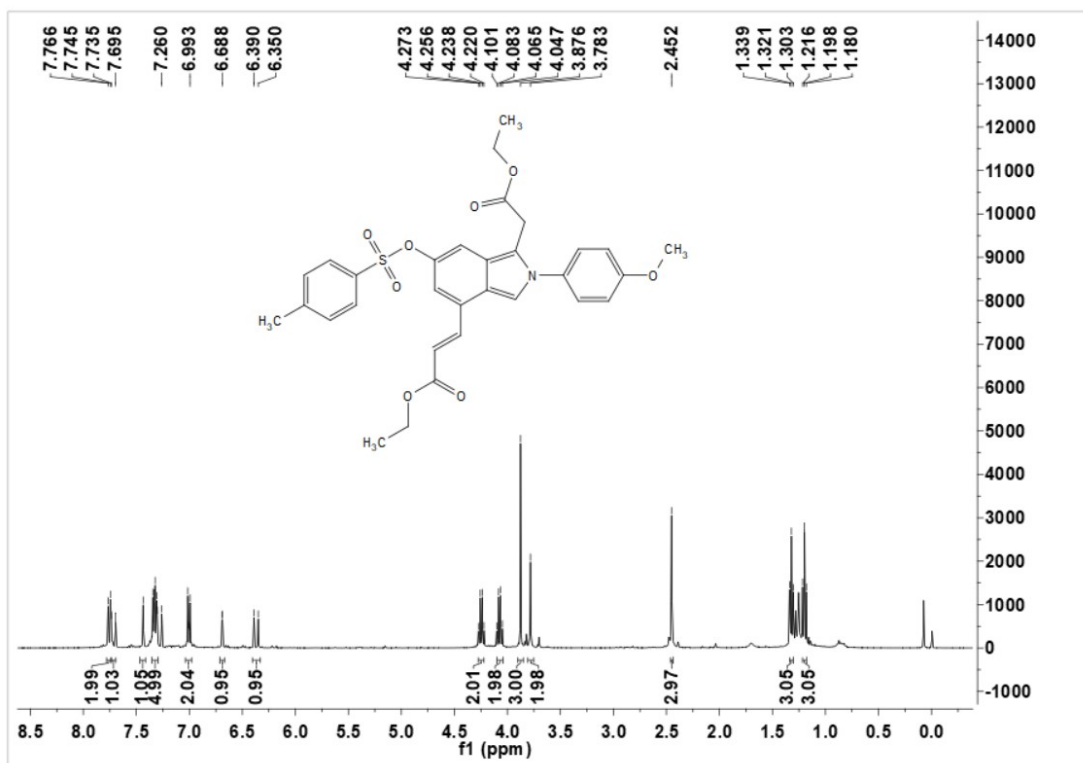

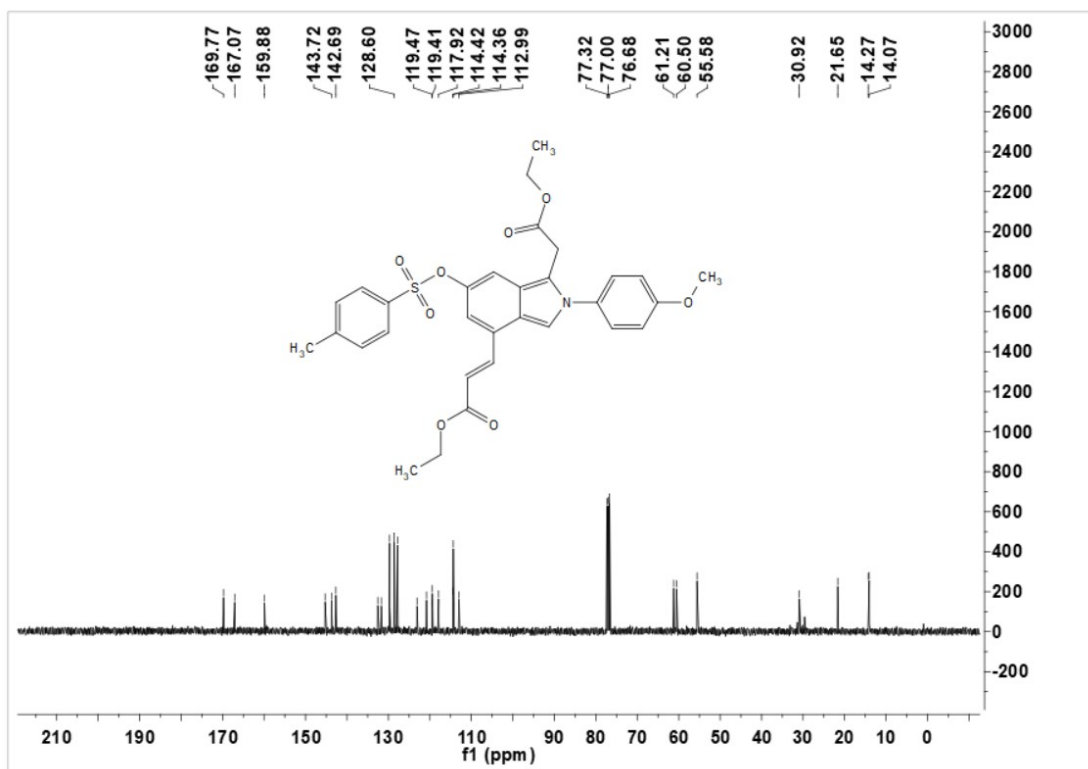

**Butyl (*E*)-3-(1-(2-butoxy-2-oxoethyl)-2-(4-methoxyphenyl)-6-(tosyloxy)-2*H*-isoindol-4-yl)acrylate (6c)**

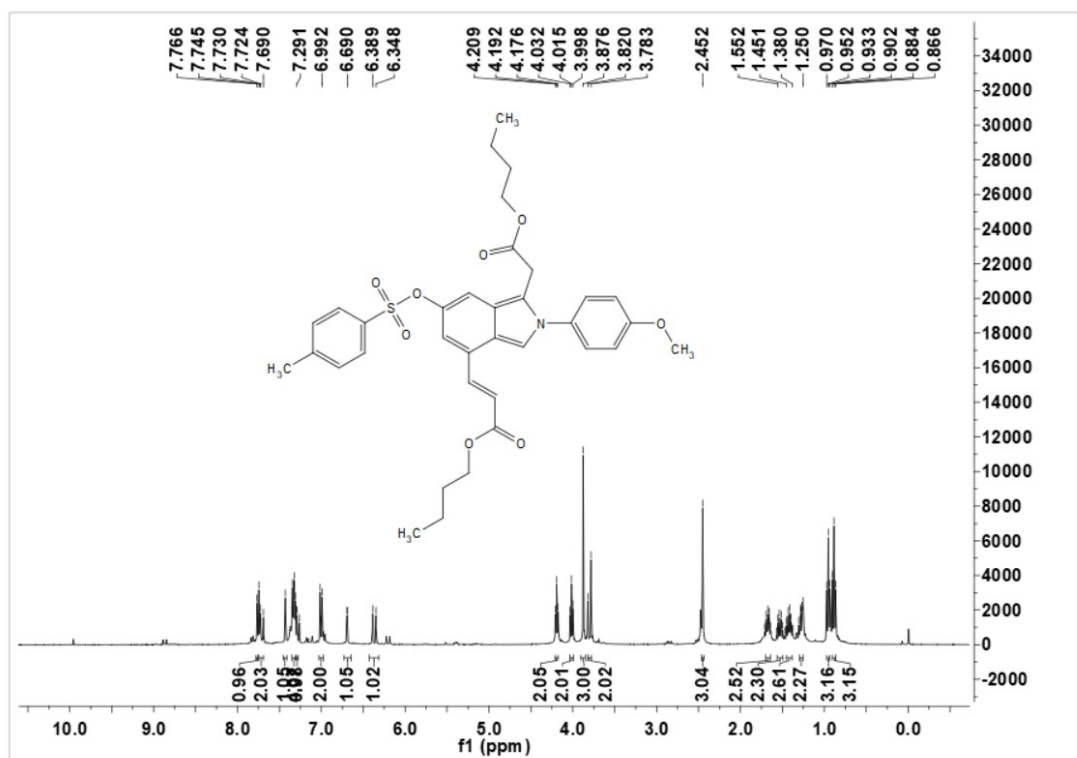

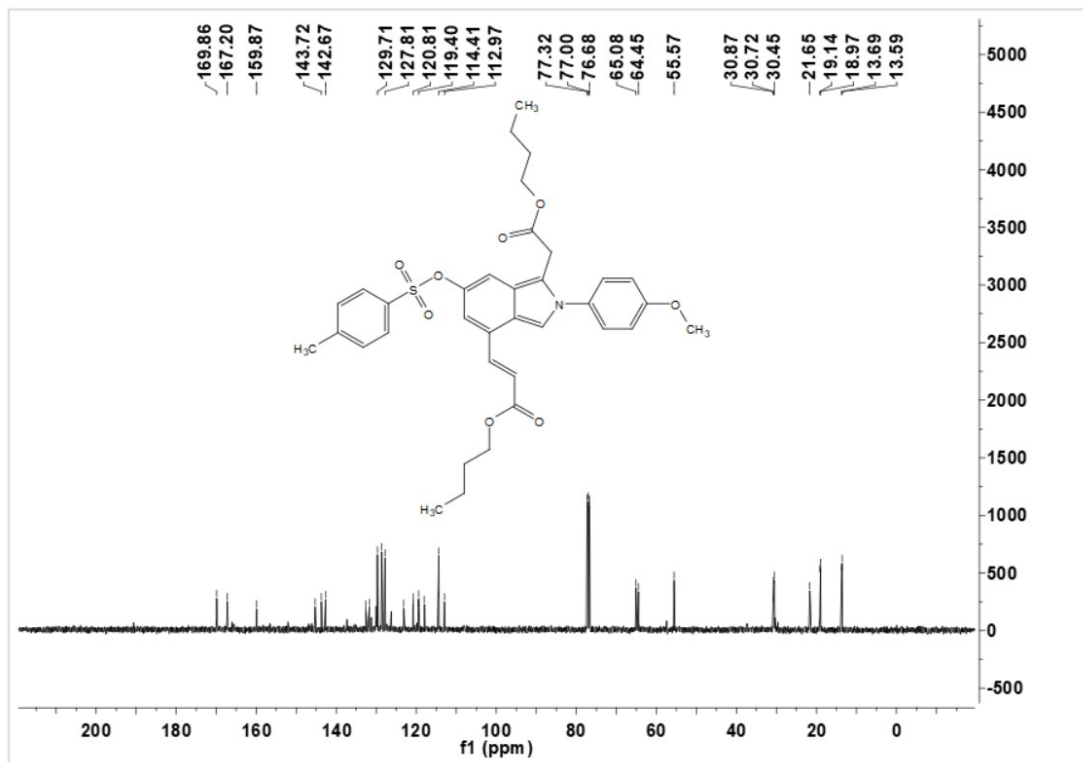

*tert*-Butyl (*E*)-3-(1-(2-(*tert*-butoxy)-2-oxoethyl)-2-(4-methoxyphenyl)-6-(tosyloxy)-2*H*-isoindol-4-yl)acrylate (6d)

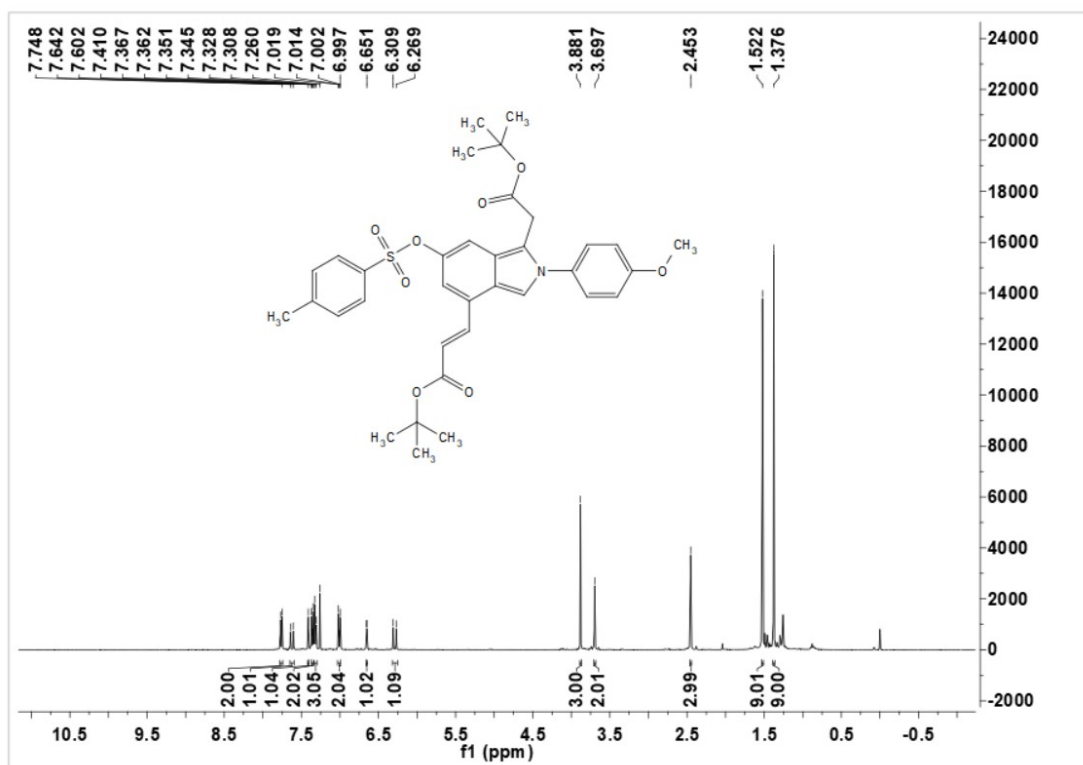



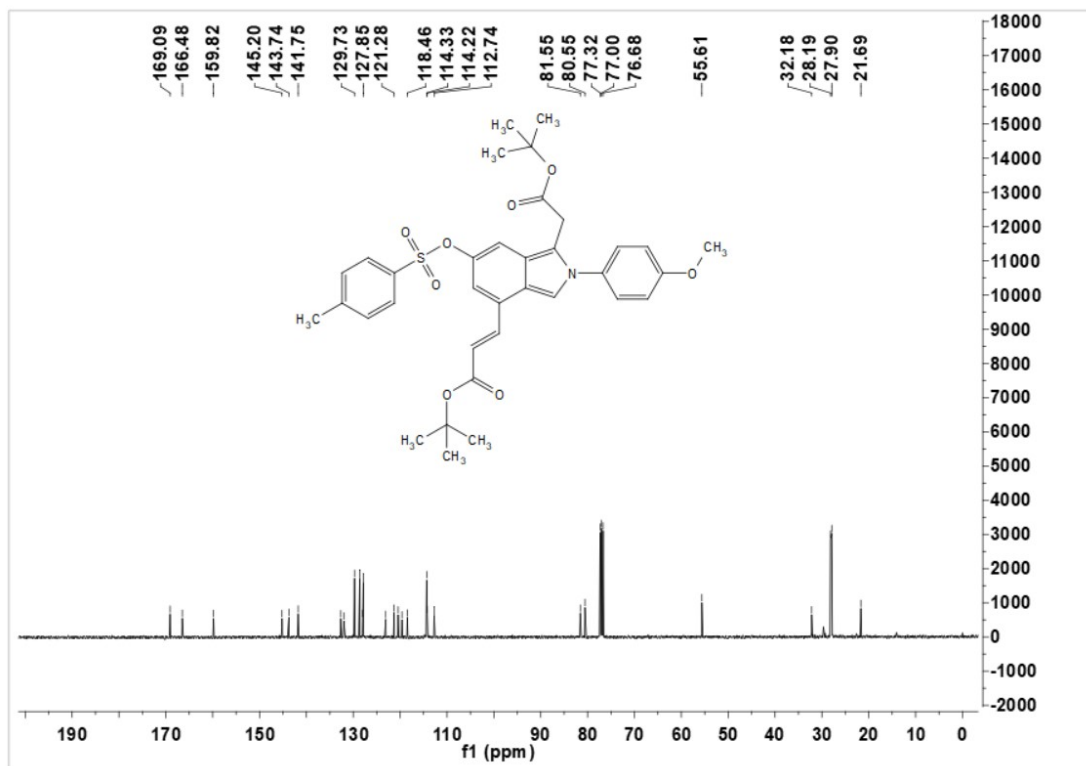

Methyl (*E*)-3-(6-chloro-1-(2-methoxy-2-oxoethyl)-2-(4-methoxyphenyl)-2*H*-isoindol-4-yl)acrylate (6f)

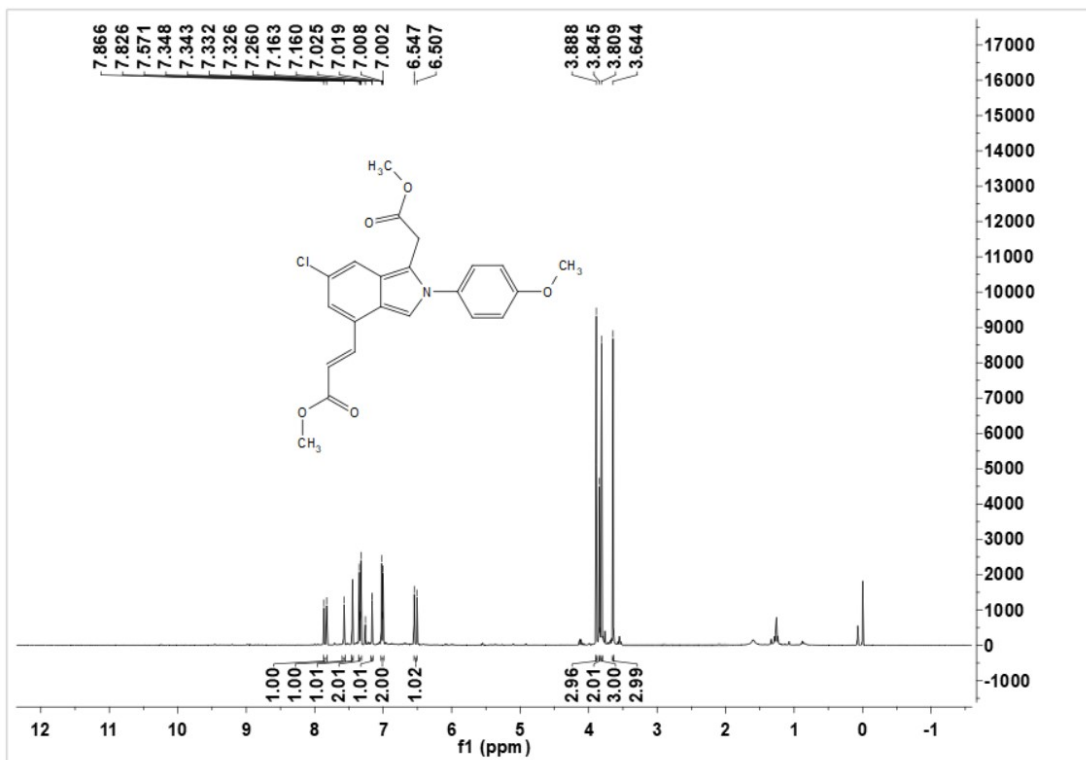

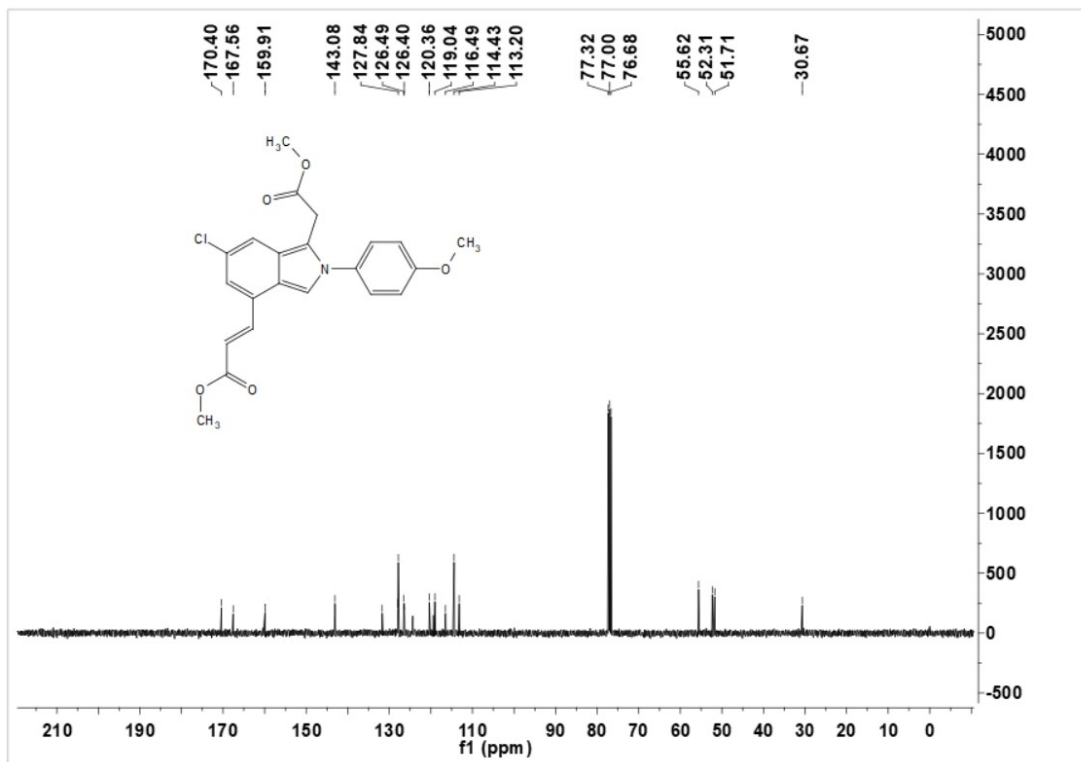

**Methyl (*E*)-3-(2-(4-chlorophenyl)-1-(2-methoxy-2-oxoethyl)-6-(tosyloxy)-2*H*-isoindol-4-yl)acrylate (6g)**

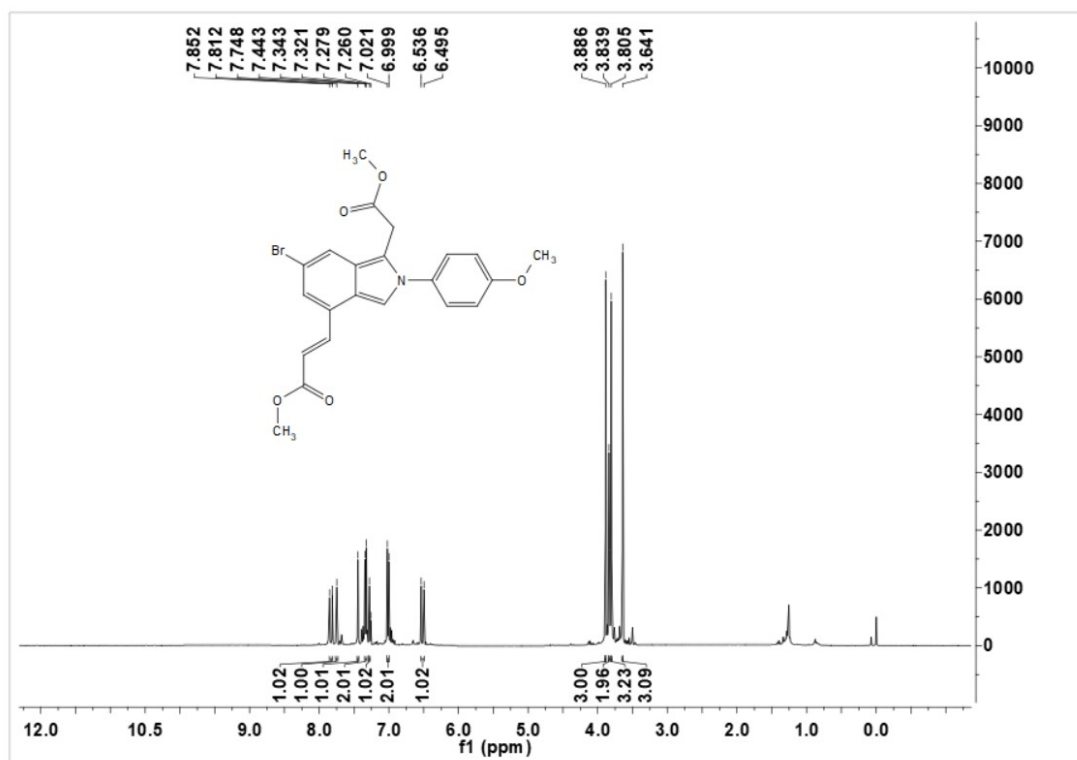

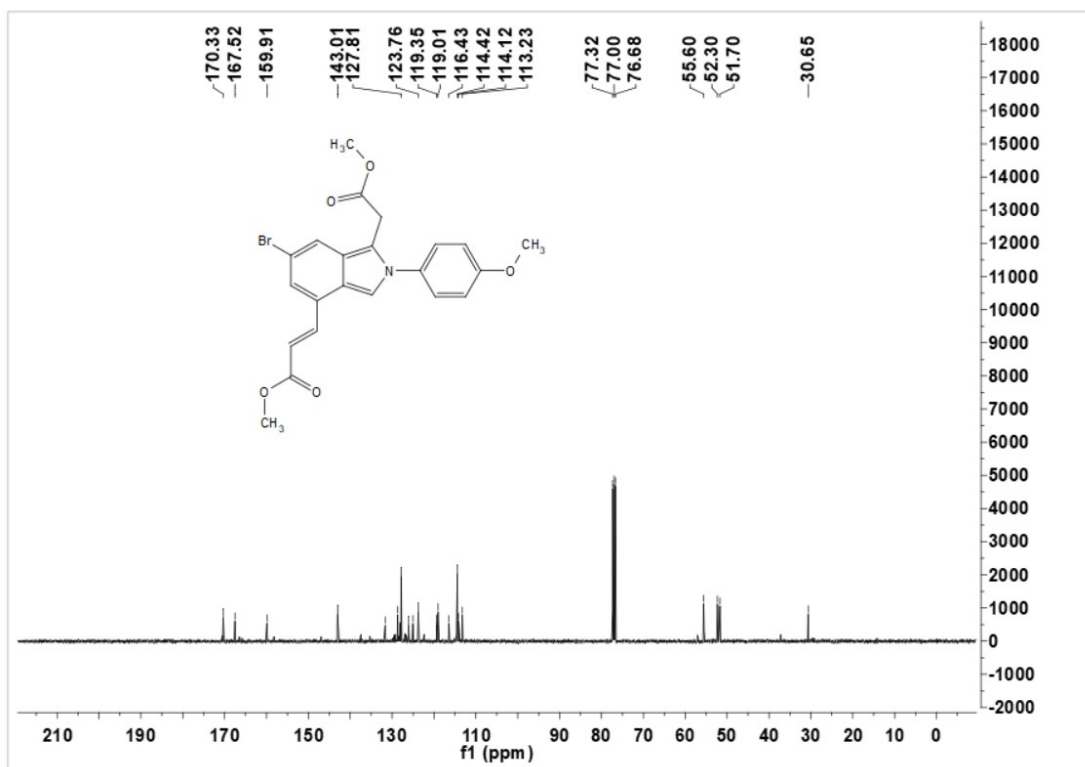

**Methyl (*E*)-3-(1-(2-methoxy-2-oxoethyl)-2-phenyl-6-(tosyloxy)-2*H*-isoindol-4-yl)acrylate (6h)**

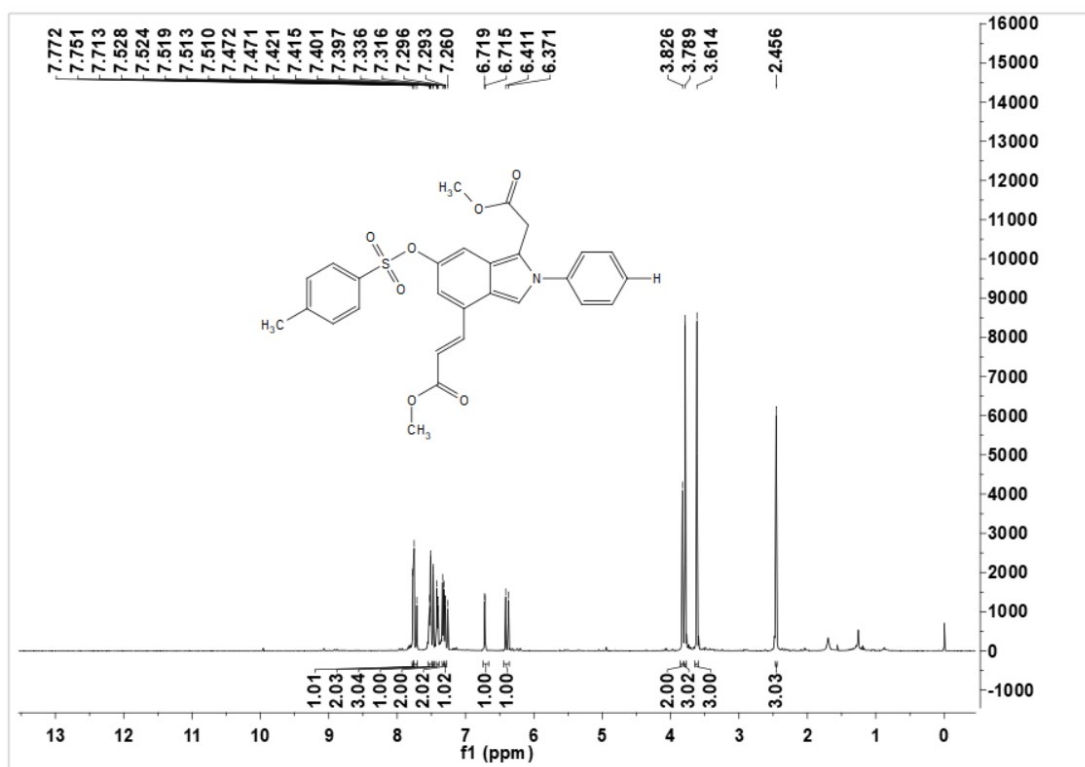

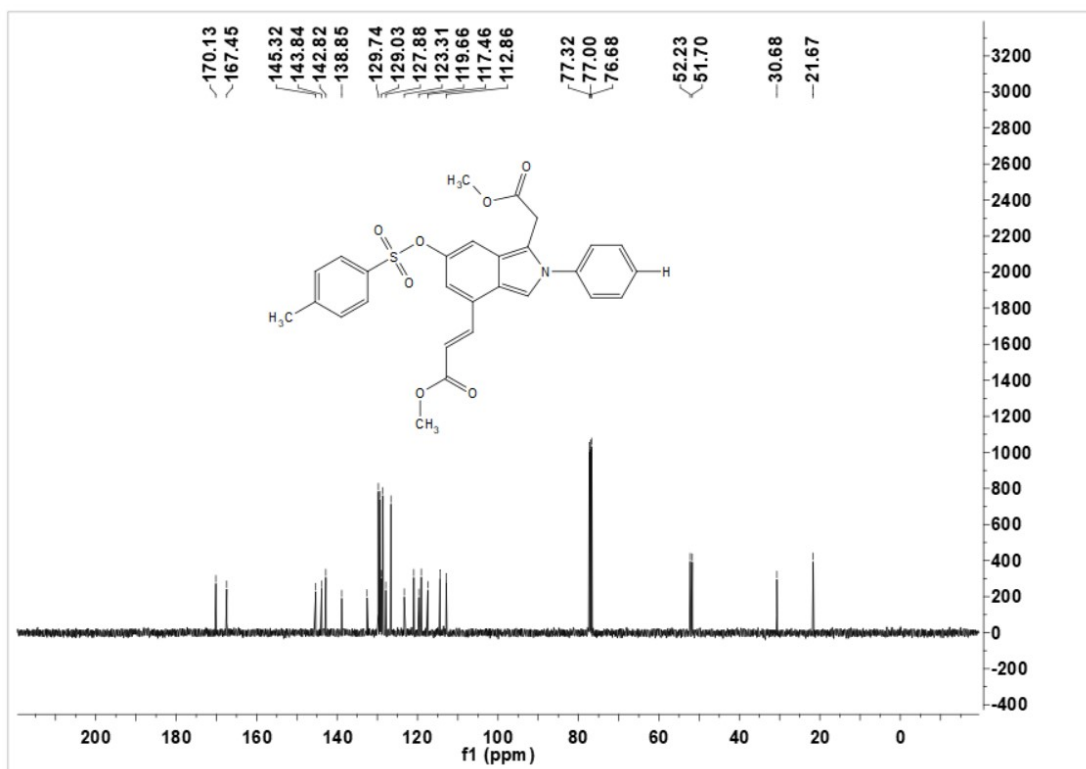

**Methyl (E)-3-(2-(4-chlorophenyl)-1-(2-methoxy-2-oxoethyl)-6-(tosyloxy)-2H-isoindol-4-yl)acrylate (6i)**

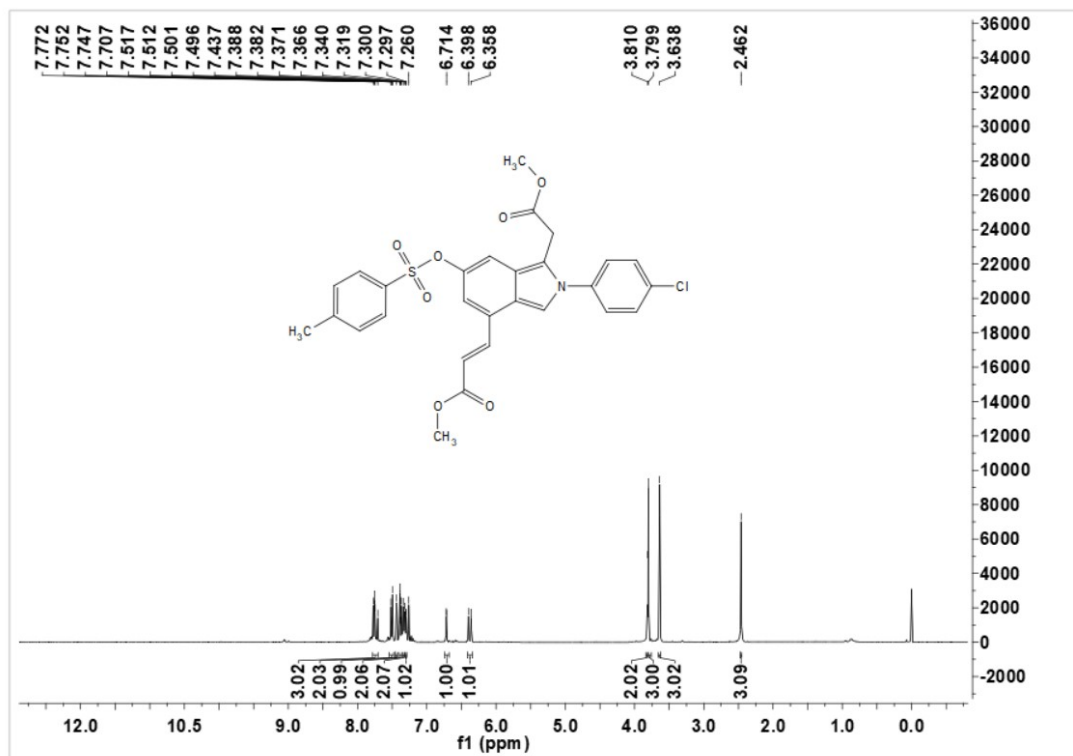



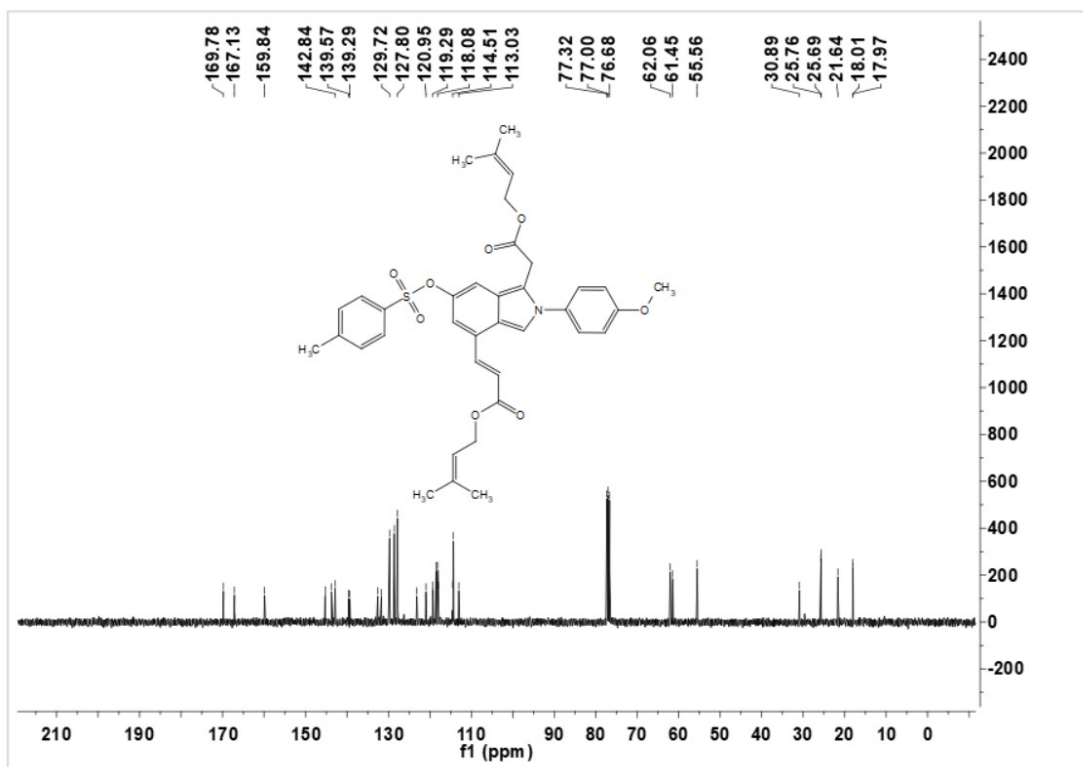

**4-Chlorobenzyl (*E*)-3-(1-(2-((4-chlorobenzyl)oxy)-2-oxoethyl)-2-(4-methoxyphenyl)-6-(tosyloxy)-2*H*-isoindol-4-yl)acrylate (6k)**

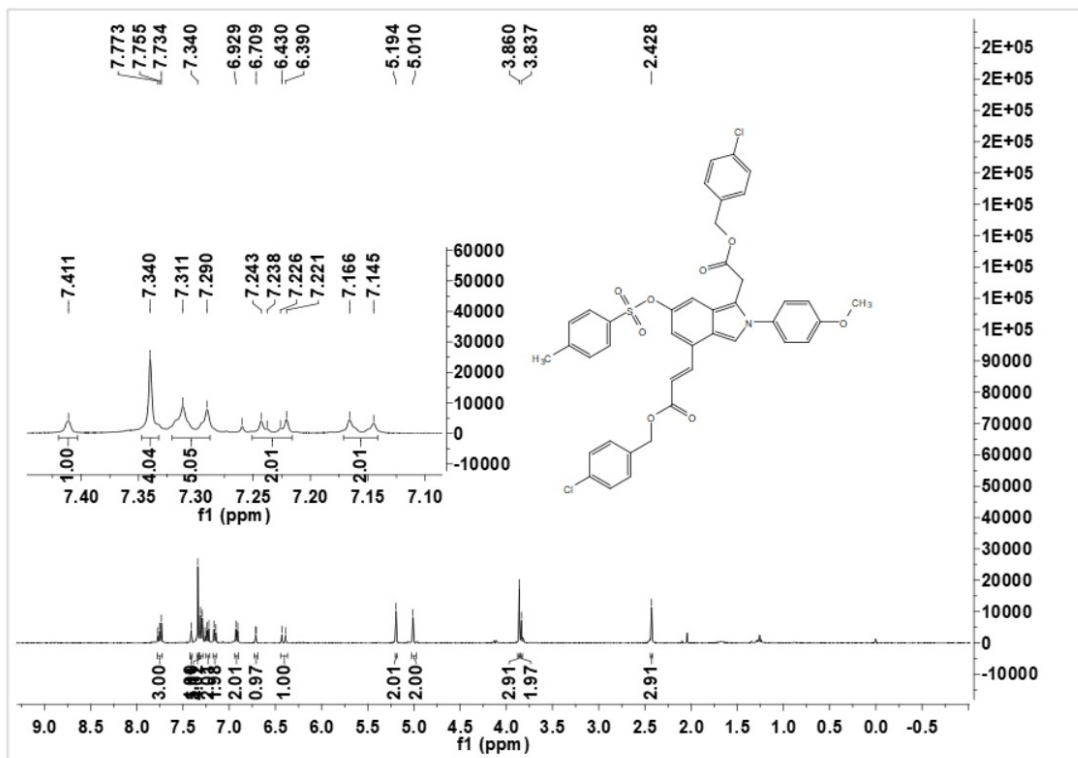

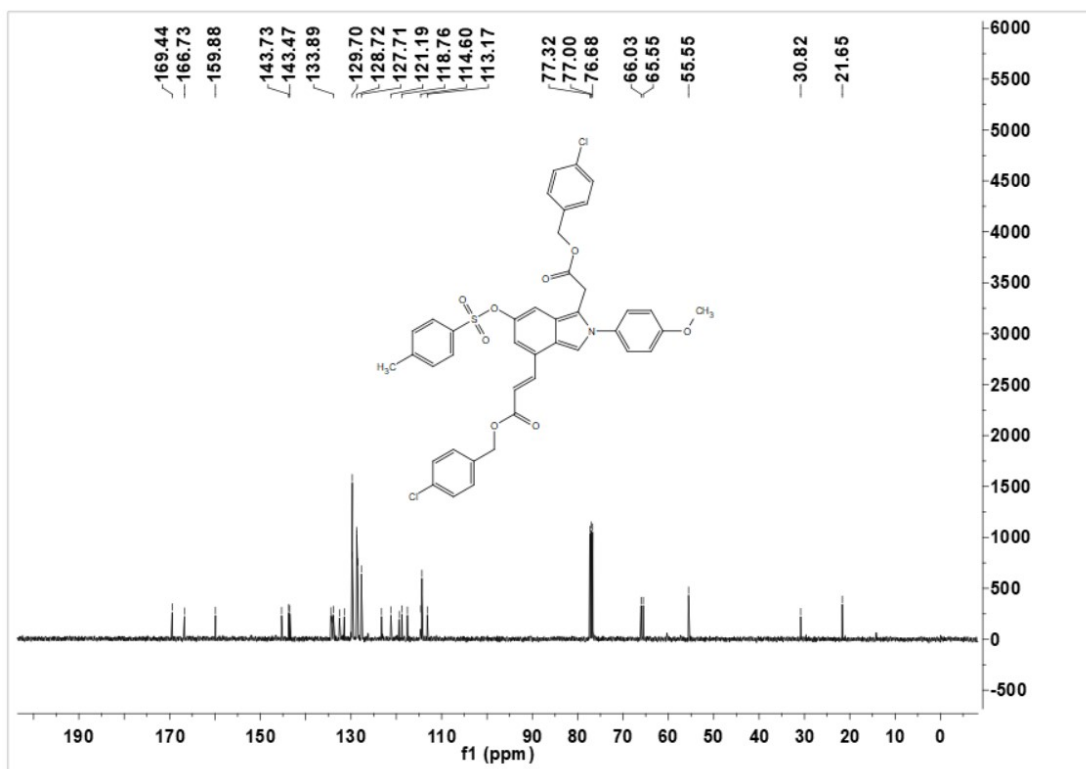

**4-Chlorobenzyl (*E*)-3-(1-(2-((4-chlorobenzyl)oxy)-2-oxoethyl)-2-(2,4-dichlorophenyl)-6-(tosyloxy)-2*H*-isoindol-4-yl)acrylate (6l)**

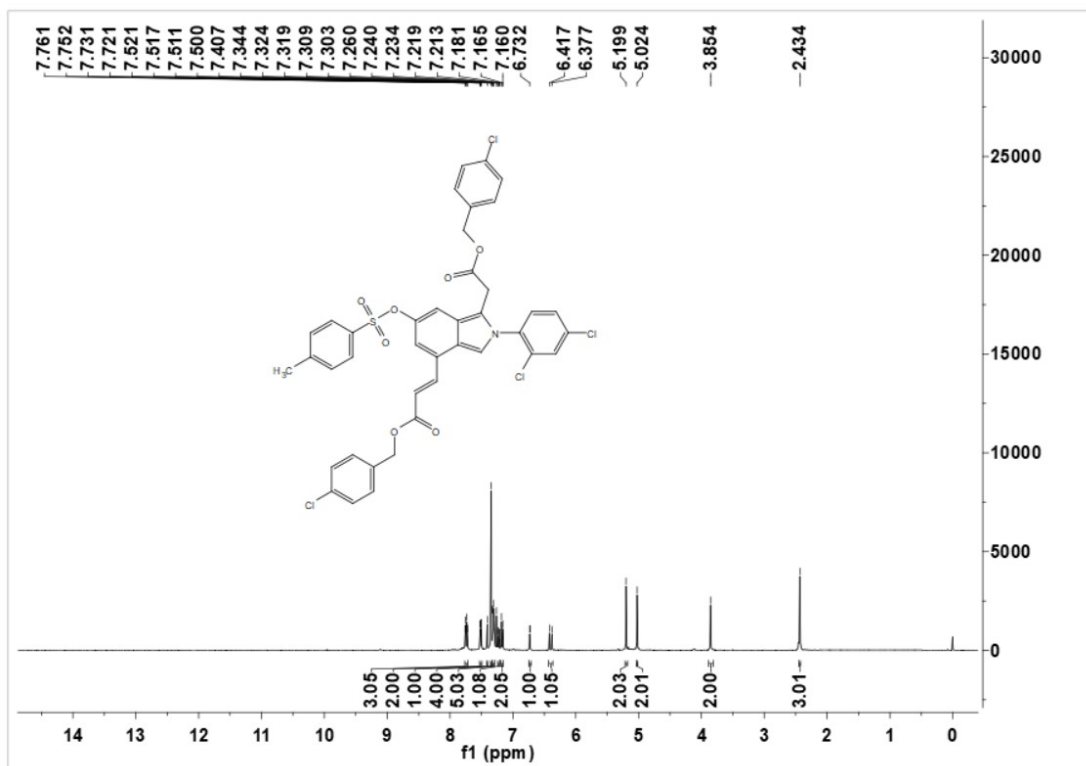

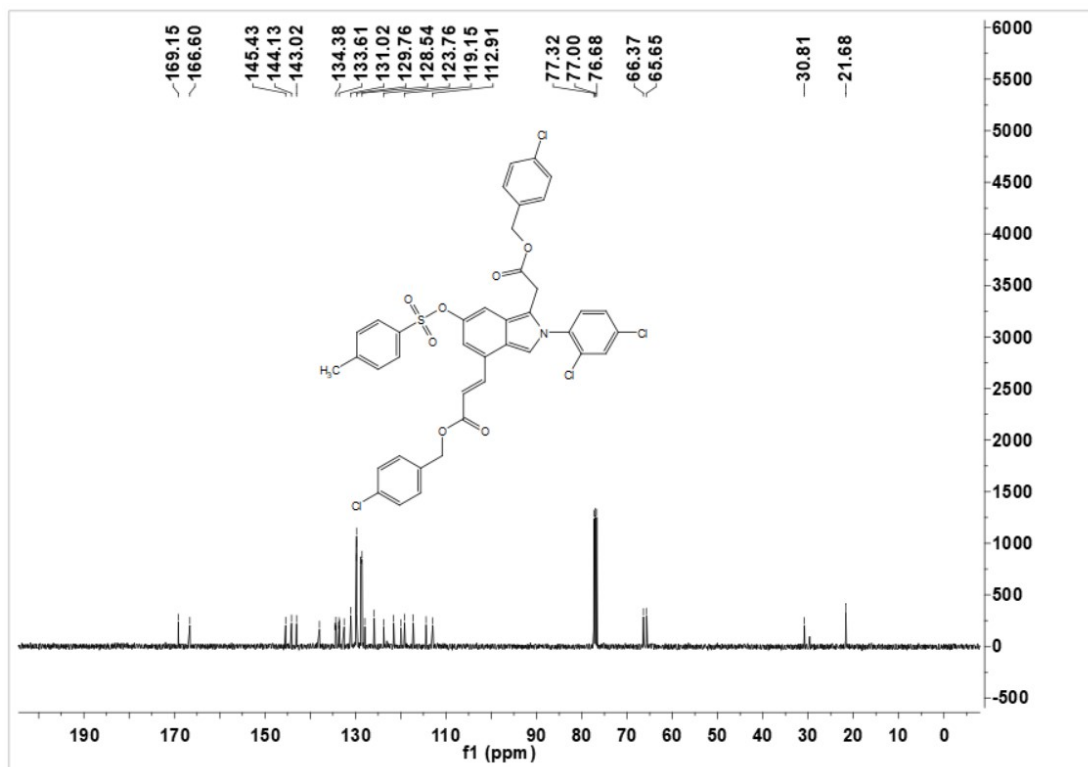

*tert*-Butyl (*E*)-3-(1-(2-(*tert*-butoxy)-2-oxoethyl)-2-phenyl-6-(tosyloxy)-2*H*-isoindol-4-yl)acrylate (6n)

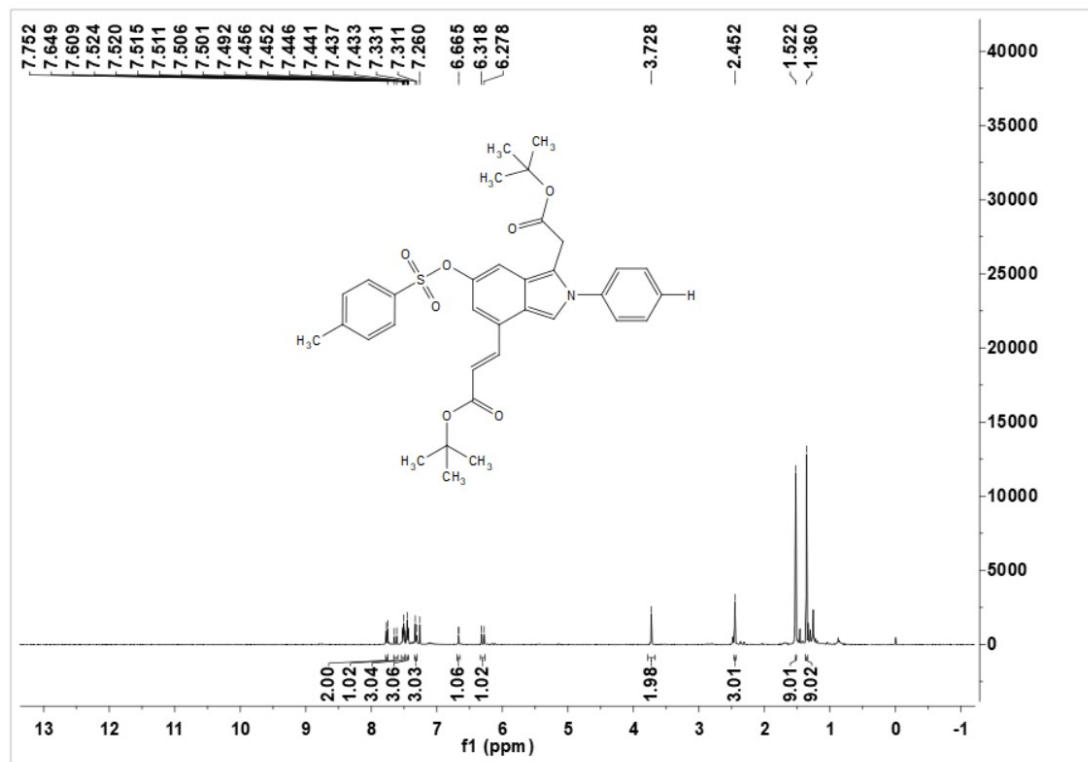



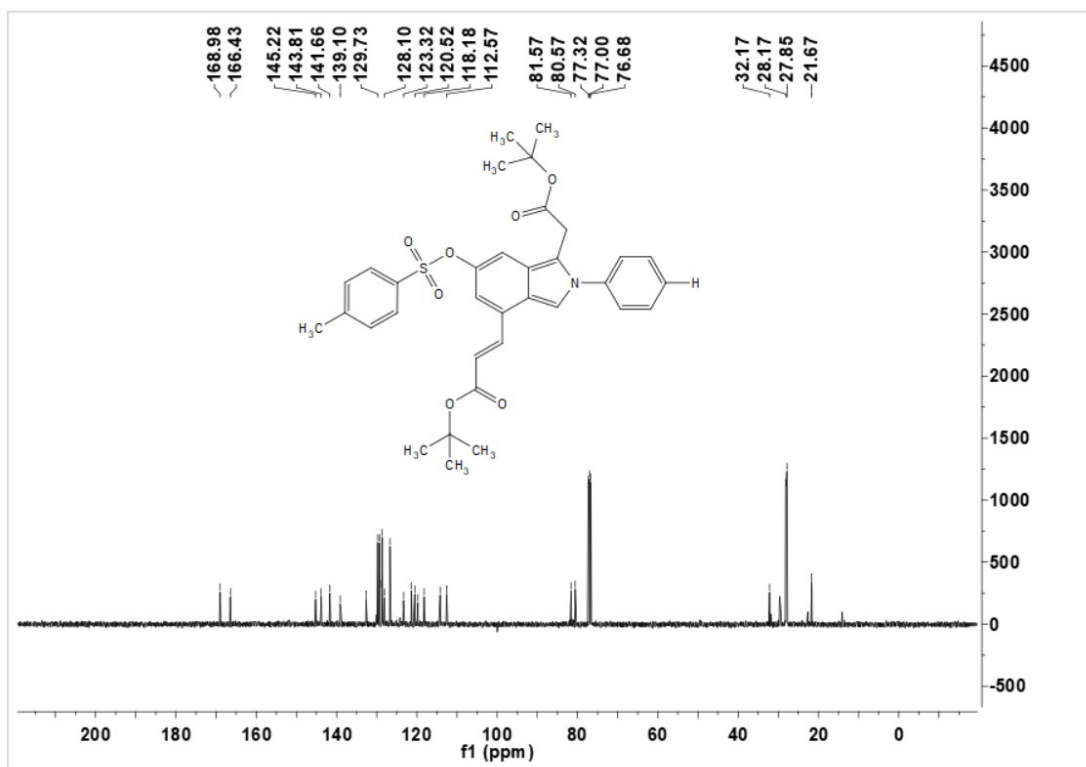

**Butyl (*E*)-3-(1-(2-butoxy-2-oxoethyl)-2-(4-fluorophenyl)-6-(tosyloxy)-2*H*-isoindol-4-yl)acrylate (60)**

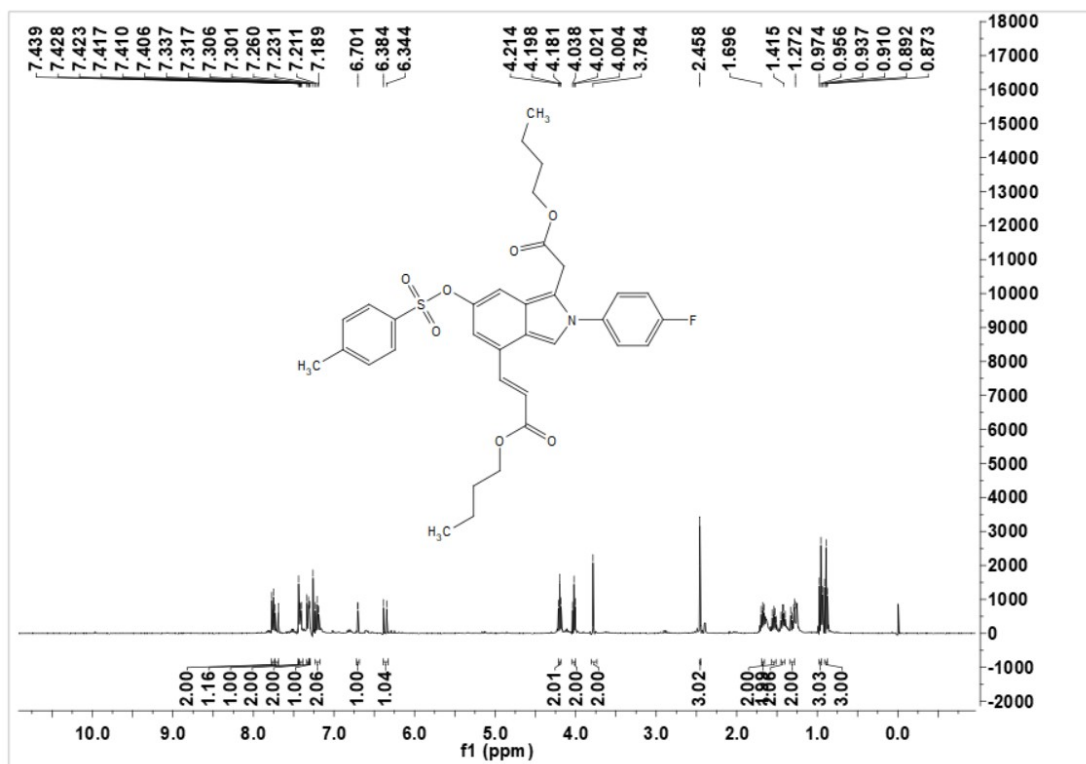

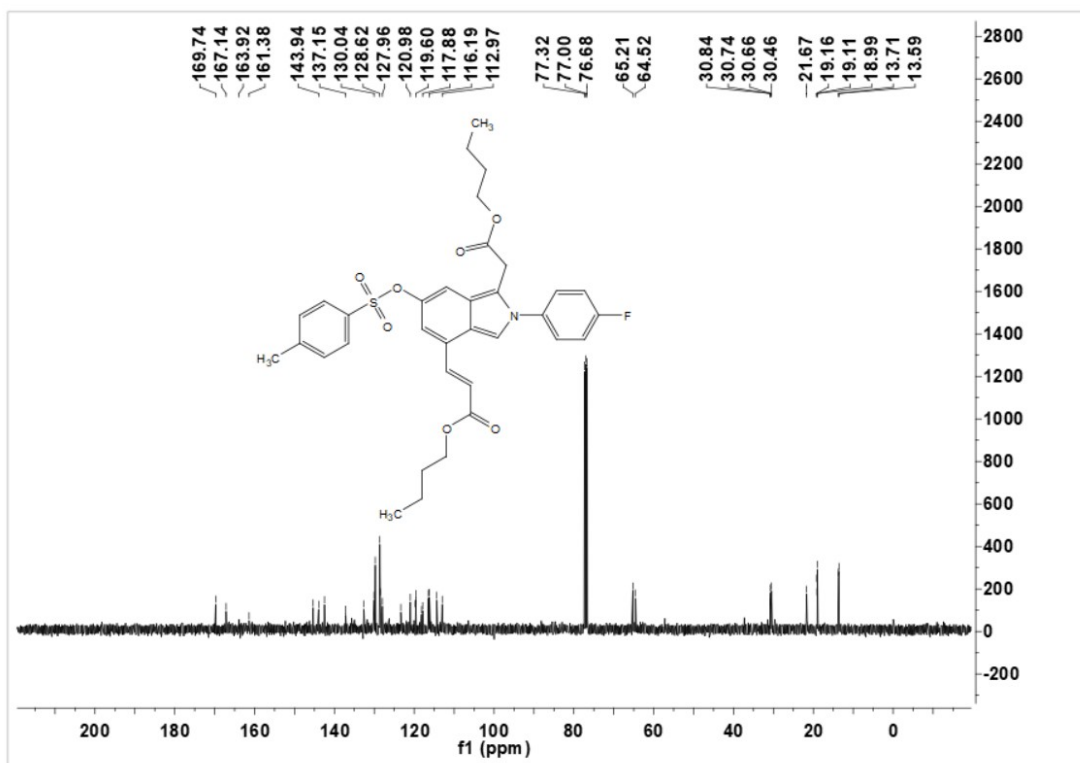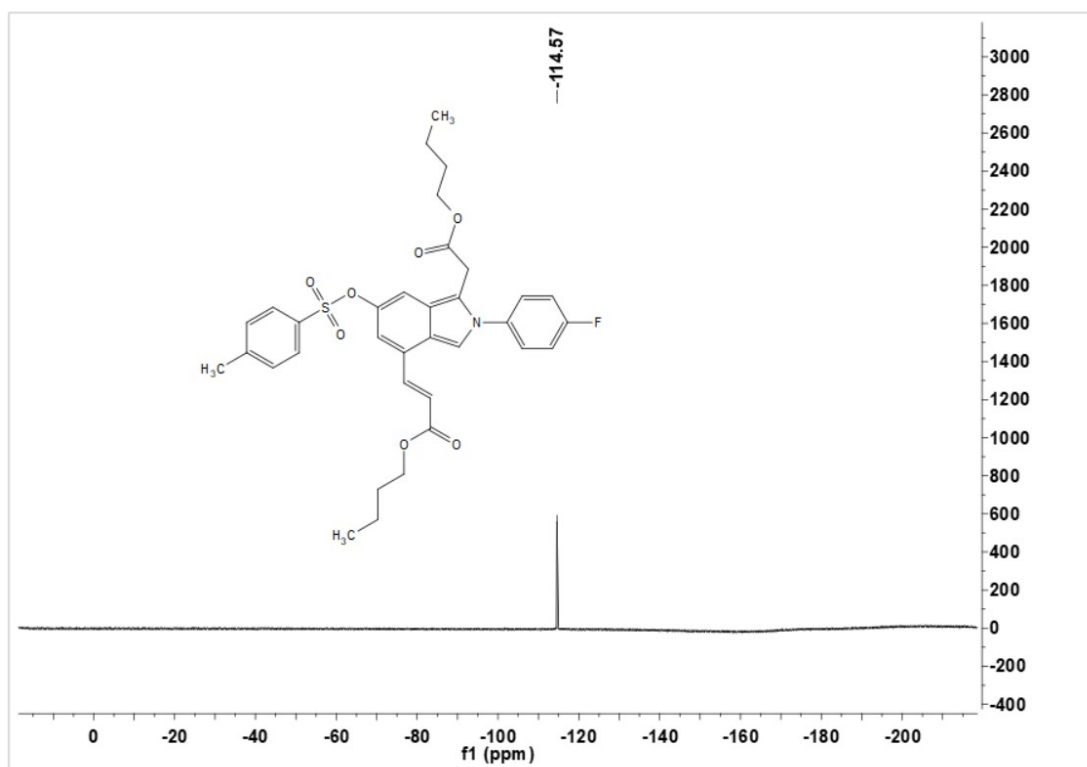

**Methyl (*E*)-3-(2-(3,4-dichlorophenyl)-1-(2-methoxy-2-oxoethyl)-6-(tosyloxy)-2*H*-isoindol-4-yl)acrylate (6p)**

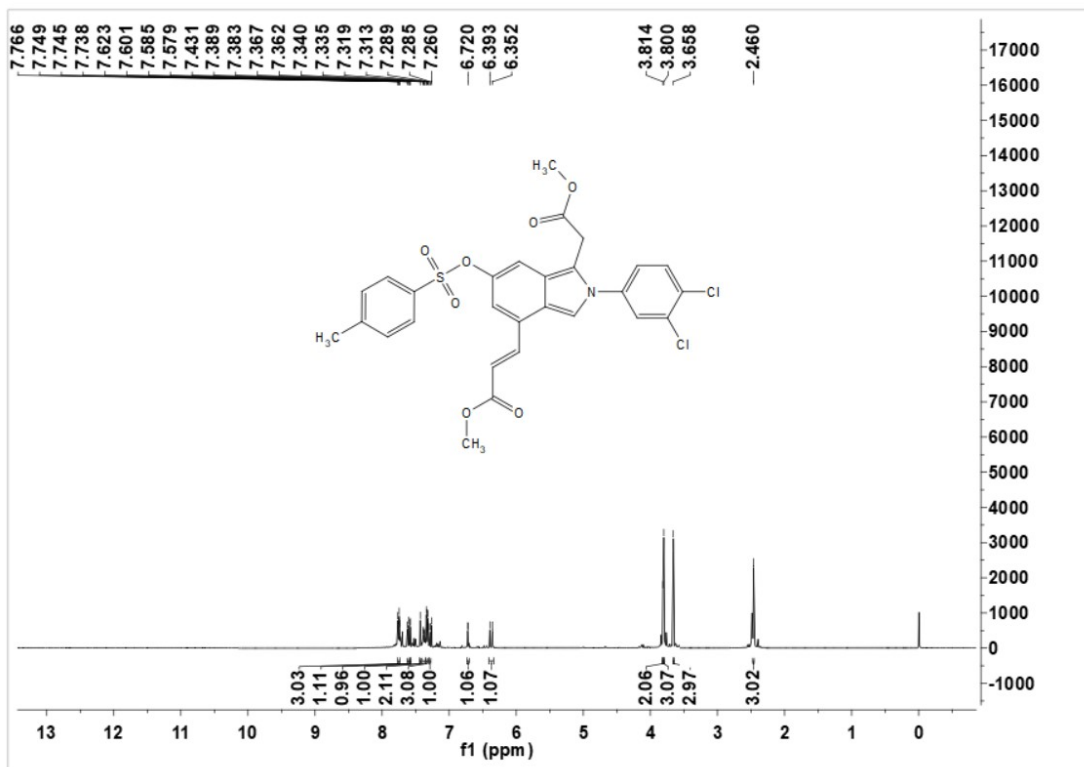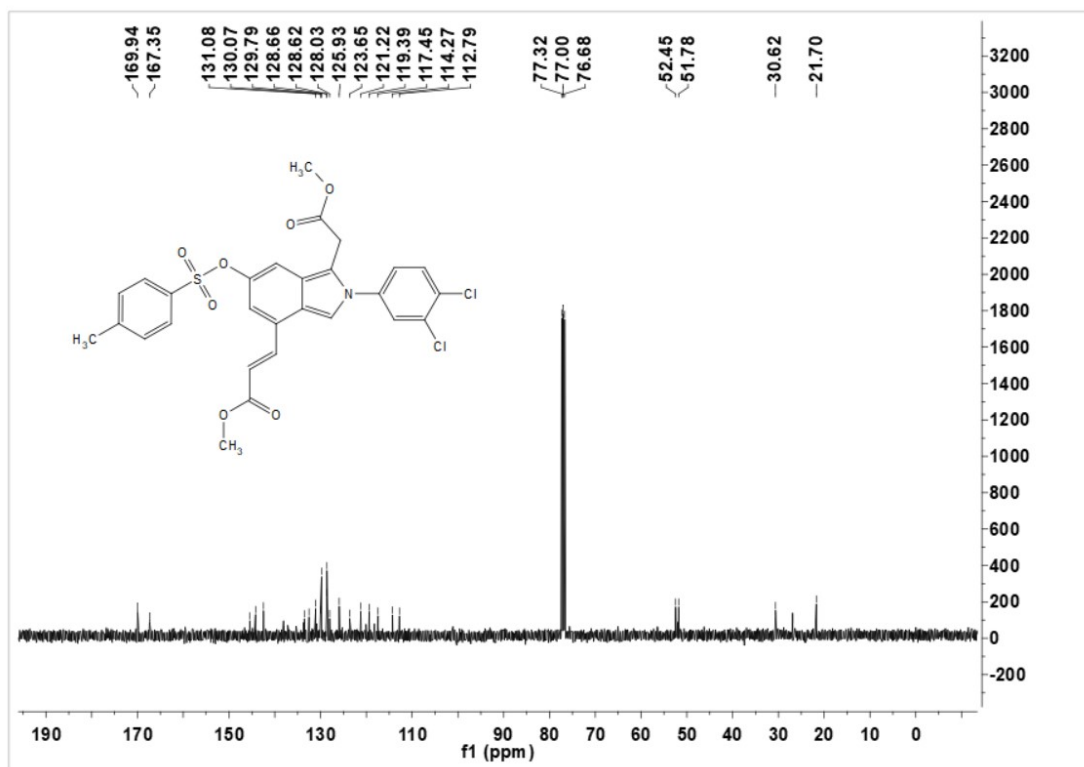

**Methyl (*E*)-3-(1-(2-methoxy-2-oxoethyl)-2-(4-morpholinophenyl)-6-(tosyloxy)-2*H*-isoindol-4-yl)acrylate (6q)**

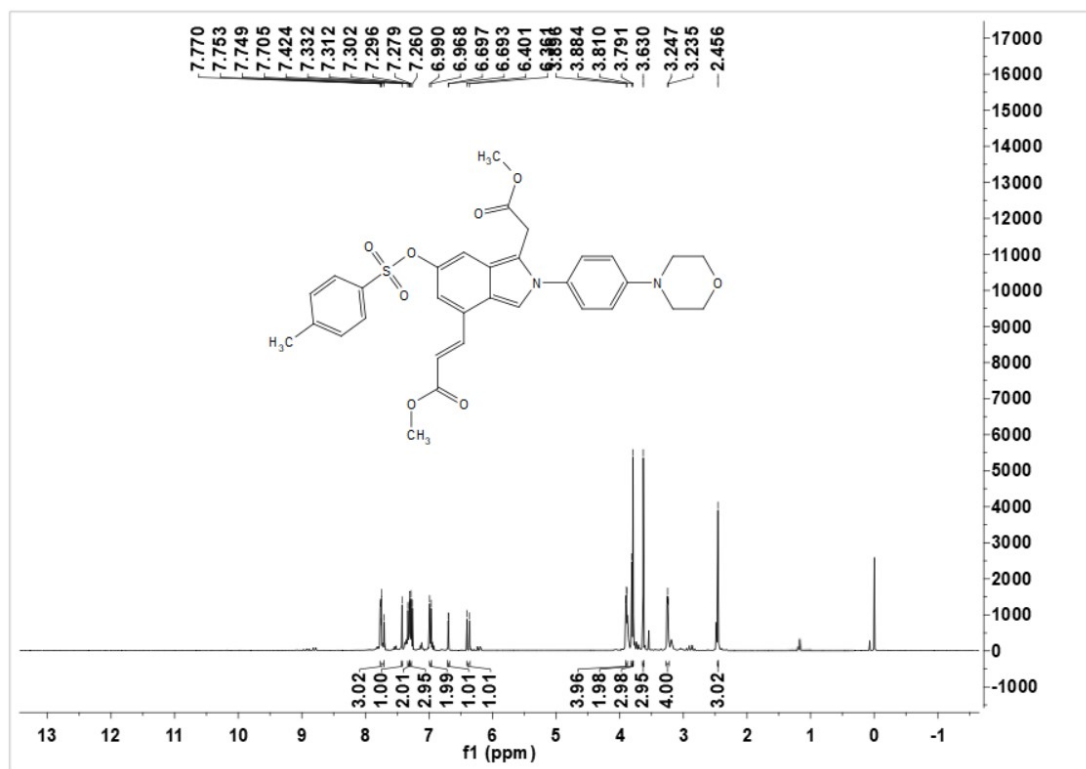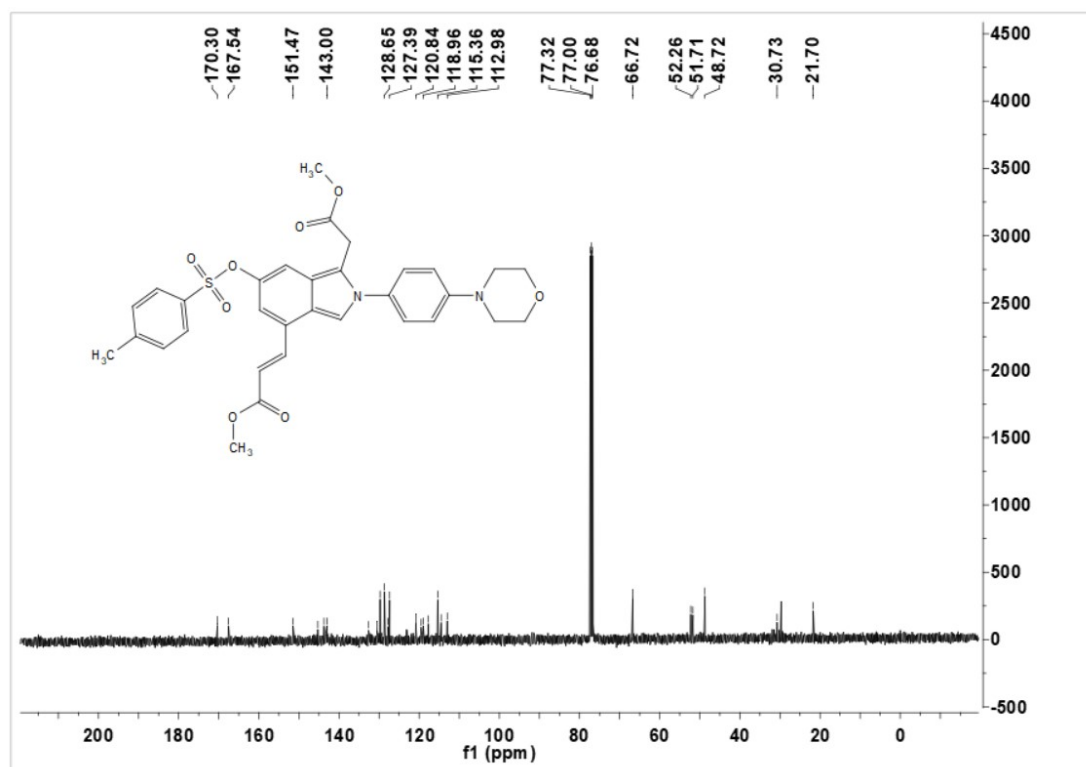

***tert*-Butyl (*E*)-3-(1-(2-(*tert*-butoxy)-2-oxoethyl)-2-(4-morpholinophenyl)-6-(tosyloxy)-2*H*-isoindol-4-yl)acrylate (**6r**)**

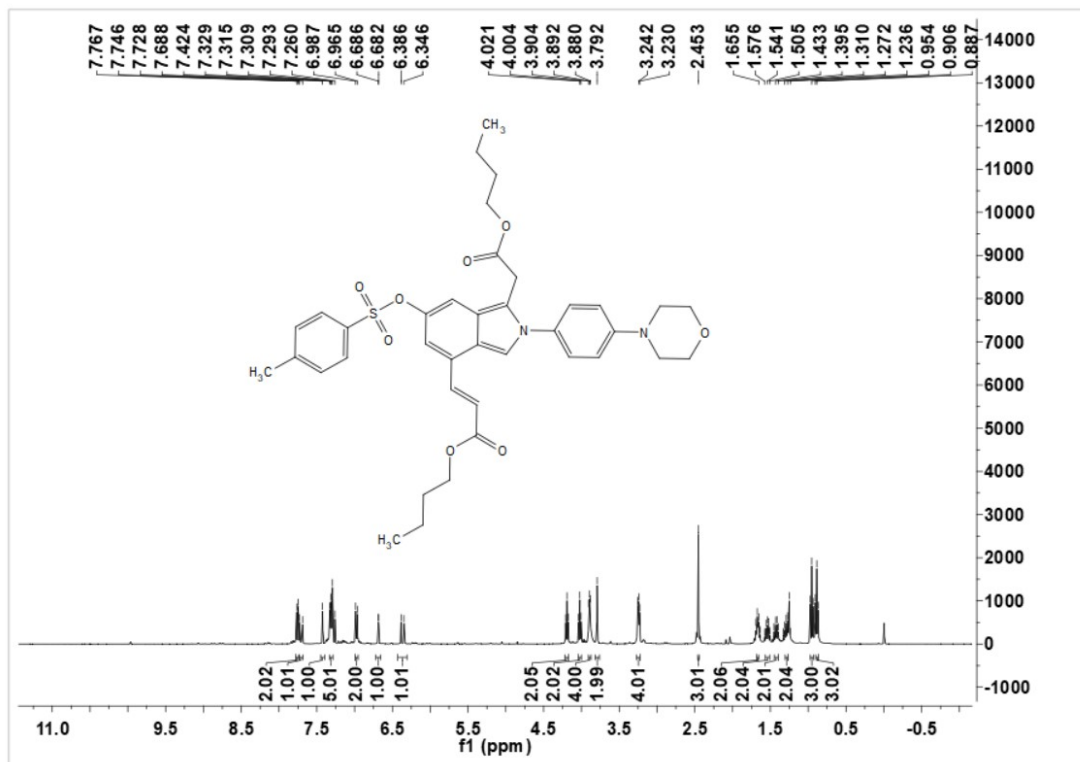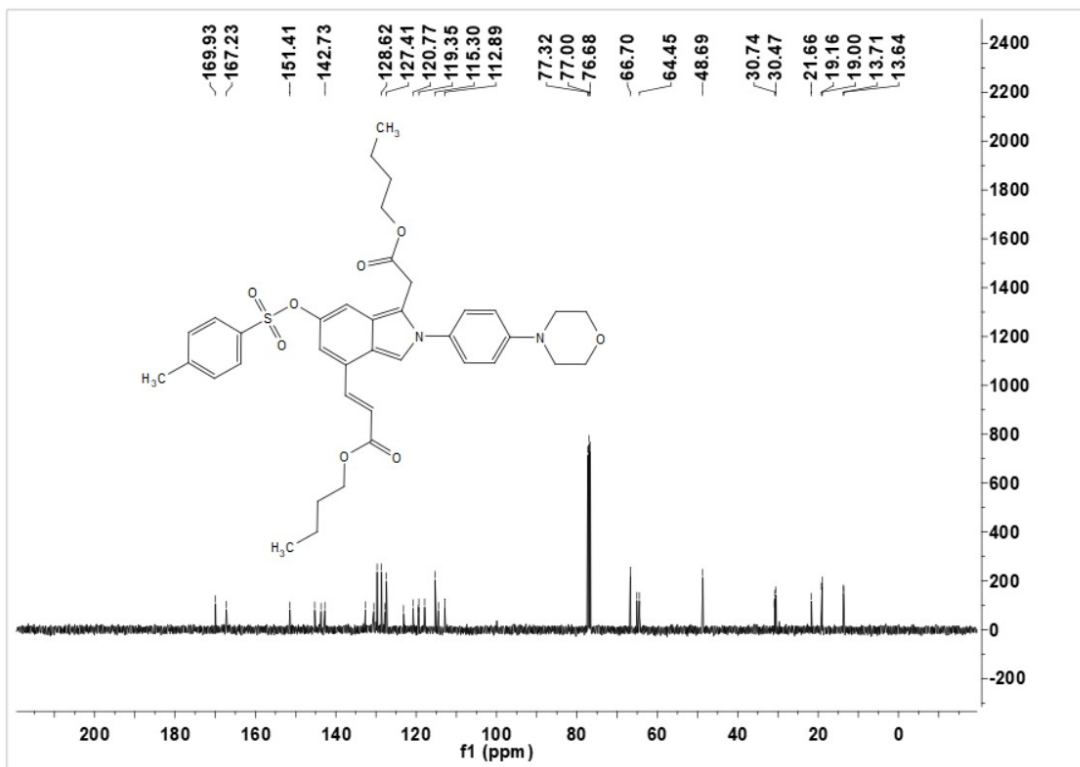

**Butyl (E)-3-(1-(2-butoxy-2-oxoethyl)-2-(4-phenoxyphenyl)-6-(tosyloxy)-2H-isoindol-4-yl)acrylate (6s)**

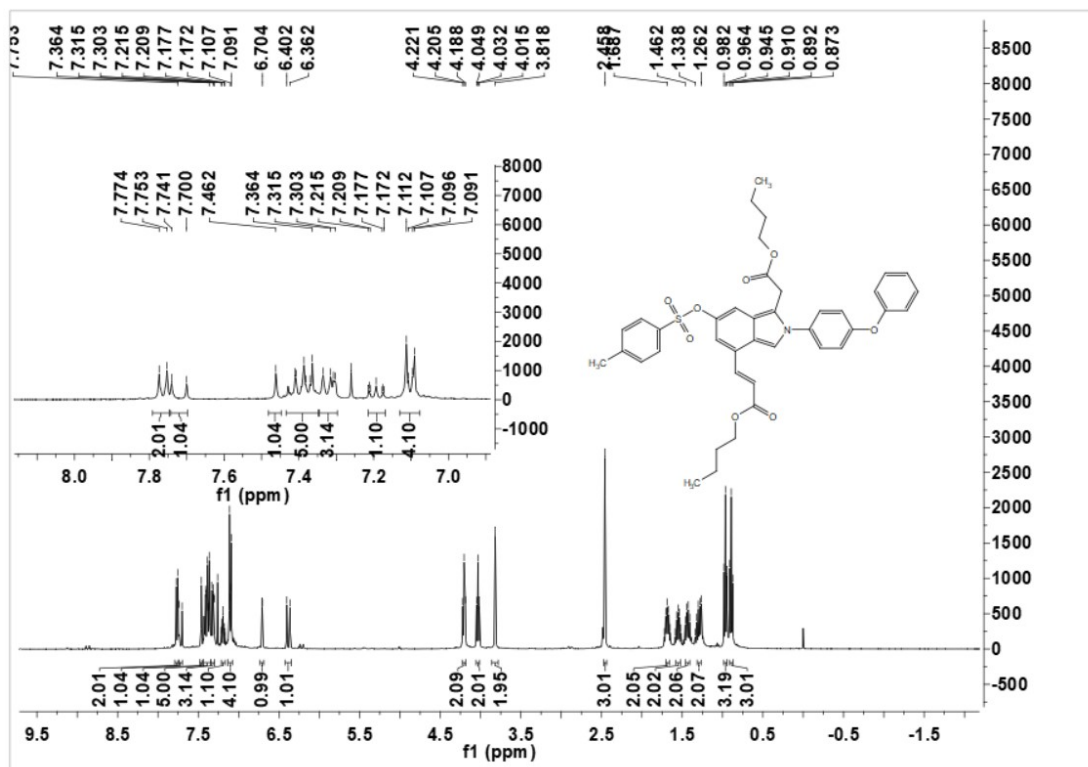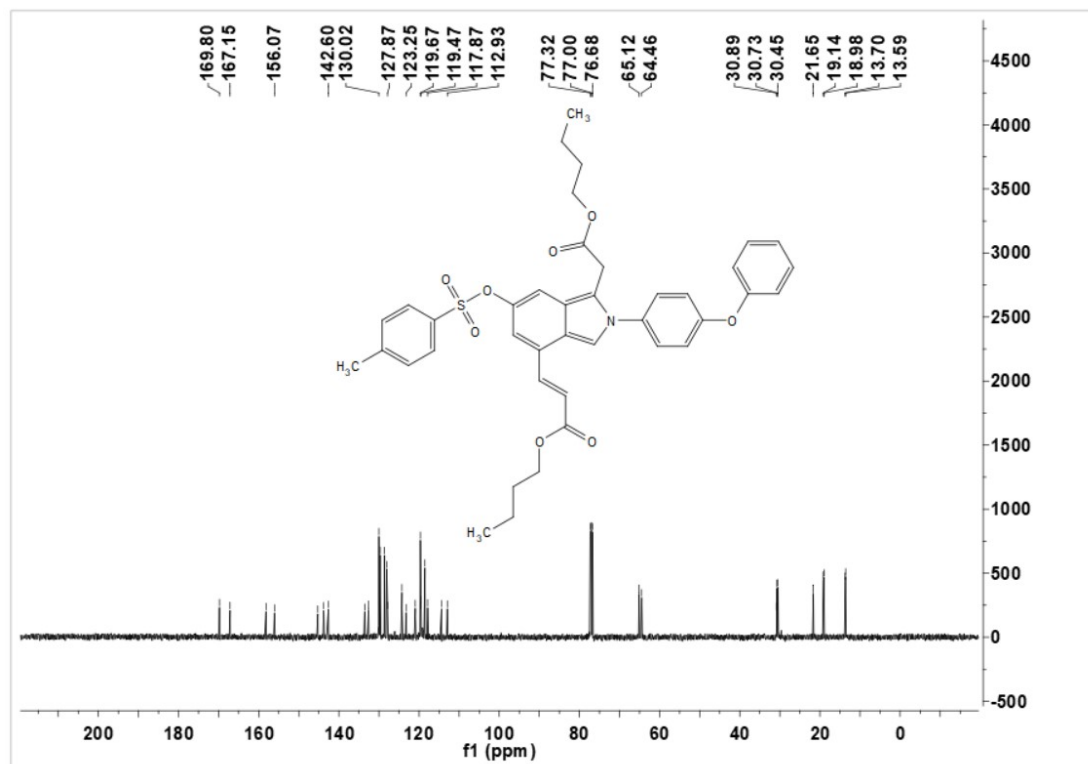

Butyl (*E*)-3-(1-(2-butoxy-2-oxoethyl)-2-(*o*-tolyl)-6-(tosyloxy)-2*H*-isoindol-4-yl)acrylate (6t)

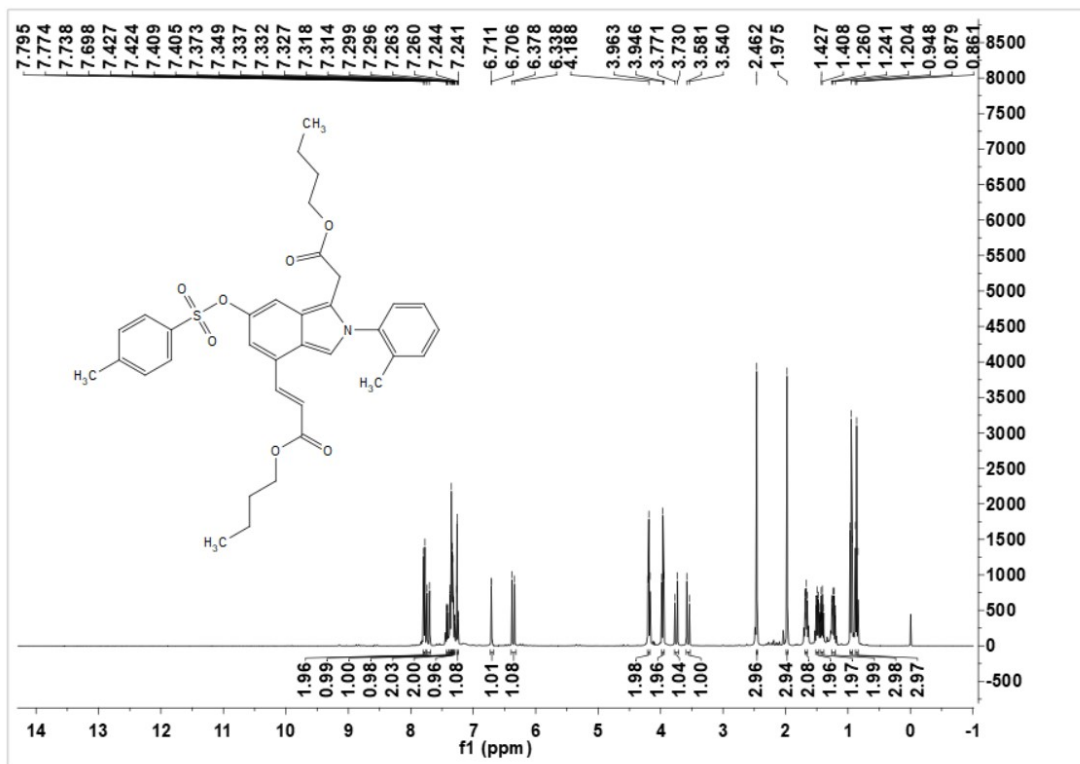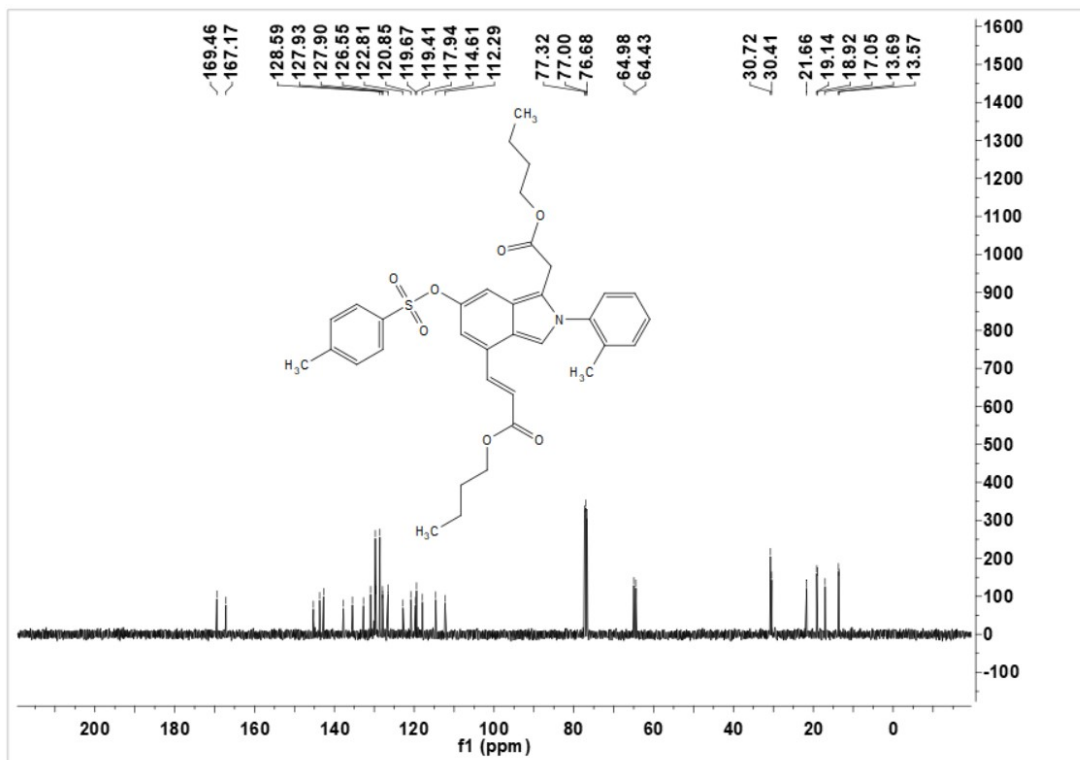

Butyl (*E*)-3-(2-(3-bromo-2-methylphenyl)-1-(2-butoxy-2-oxoethyl)-6-(tosyloxy)-2H-isoindol-4-yl)acrylate (6u)

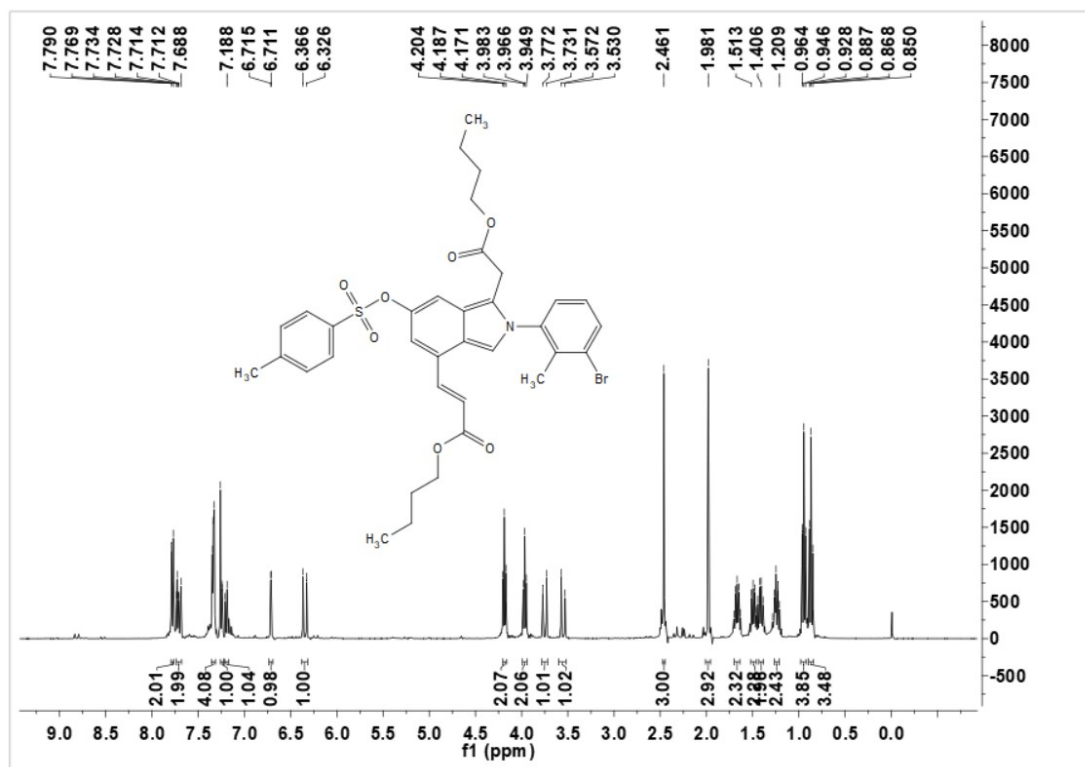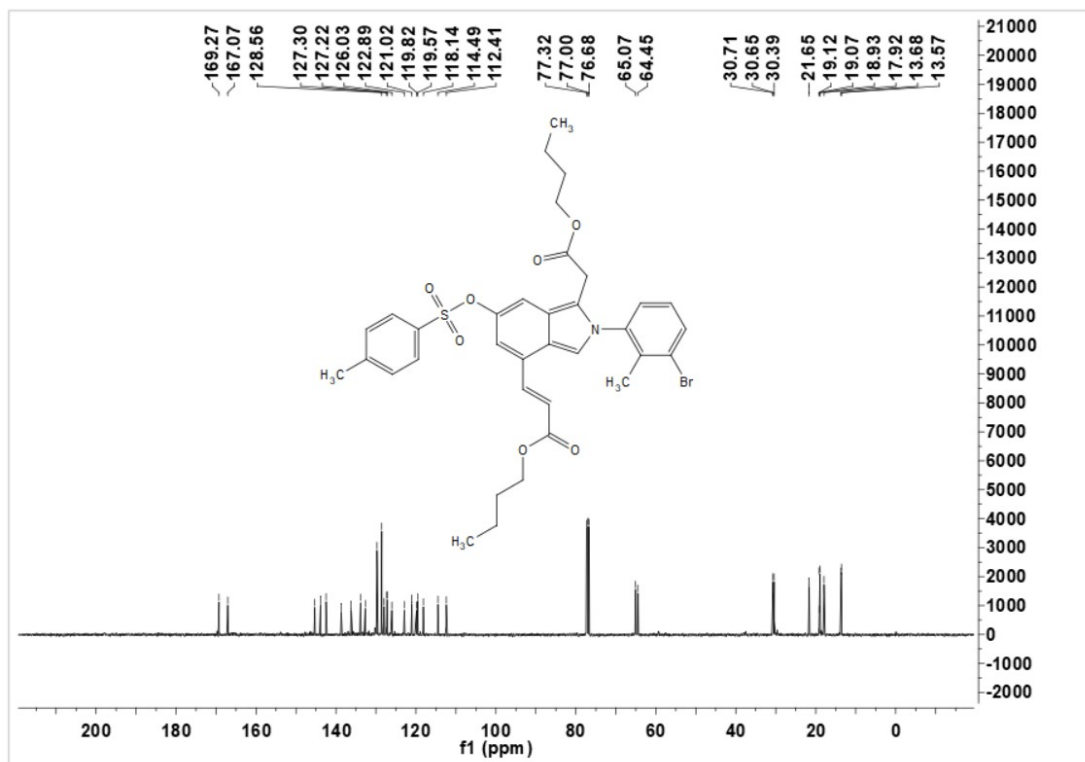



**Methyl (*E*)-3-(1-(2-methoxy-2-oxoethyl)-2-(4-methoxyphenyl)-7-(tosyloxy)-2*H*-benzo[*e*]isoindol-4-yl)acrylate (6v)**

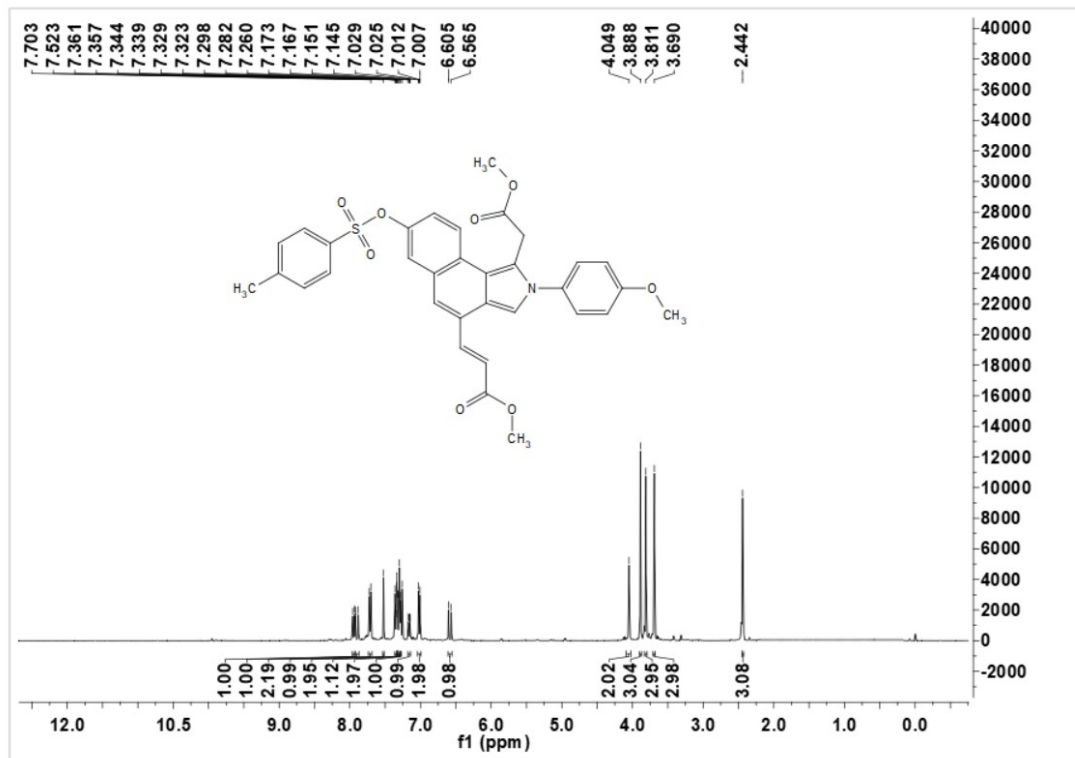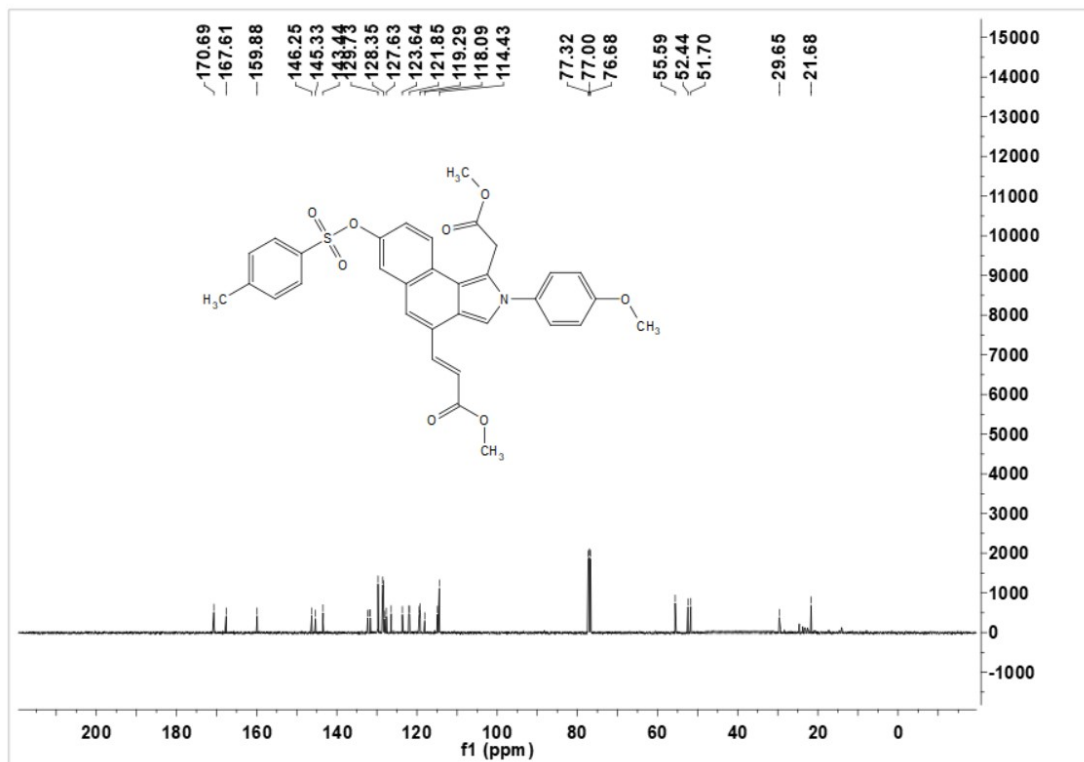

Methyl (*E*)-3-(6-(*N,N*-dipropylsulfamoyl)-1-(2-methoxy-2-oxoethyl)-2-(4-methoxyphenyl)-2*H*-isoindol-4-yl)acrylate (6w)

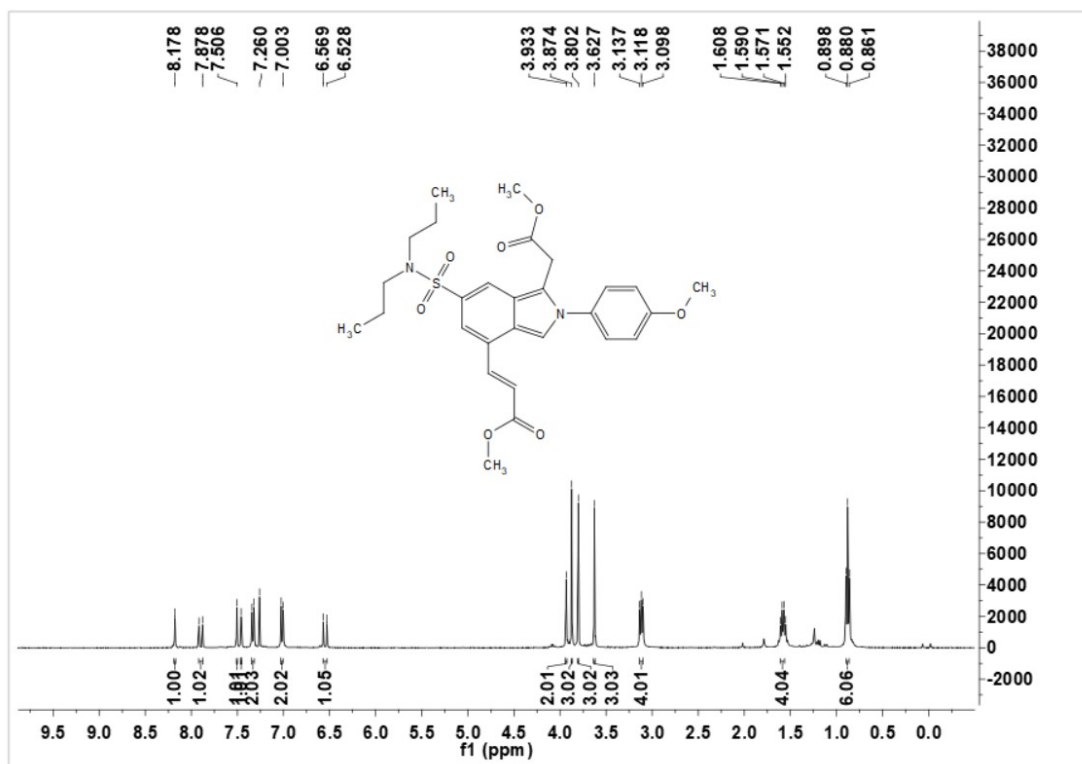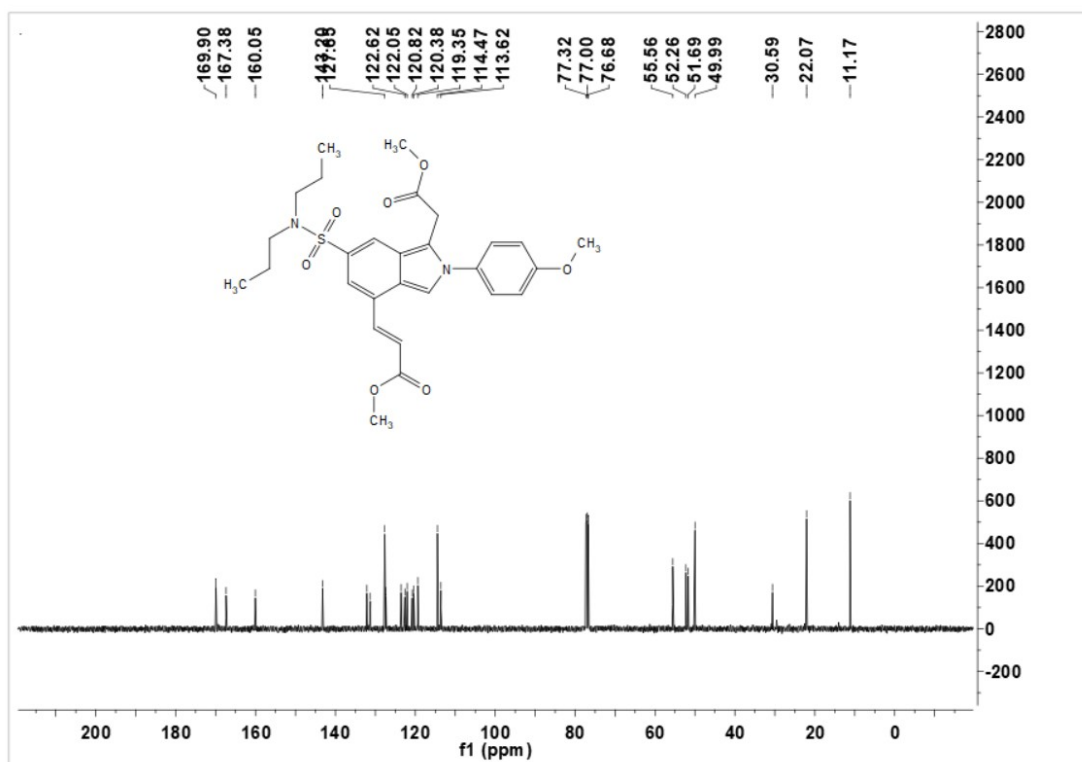

**(E)-But-2-en-1-yl (E)-3-(1-(2-(((E)-but-2-en-1-yl)oxy)-2-oxoethyl)-2-(4-methoxyphenyl)-6-(tosyloxy)-2H-isoindol-4-yl)acrylate (6x)**

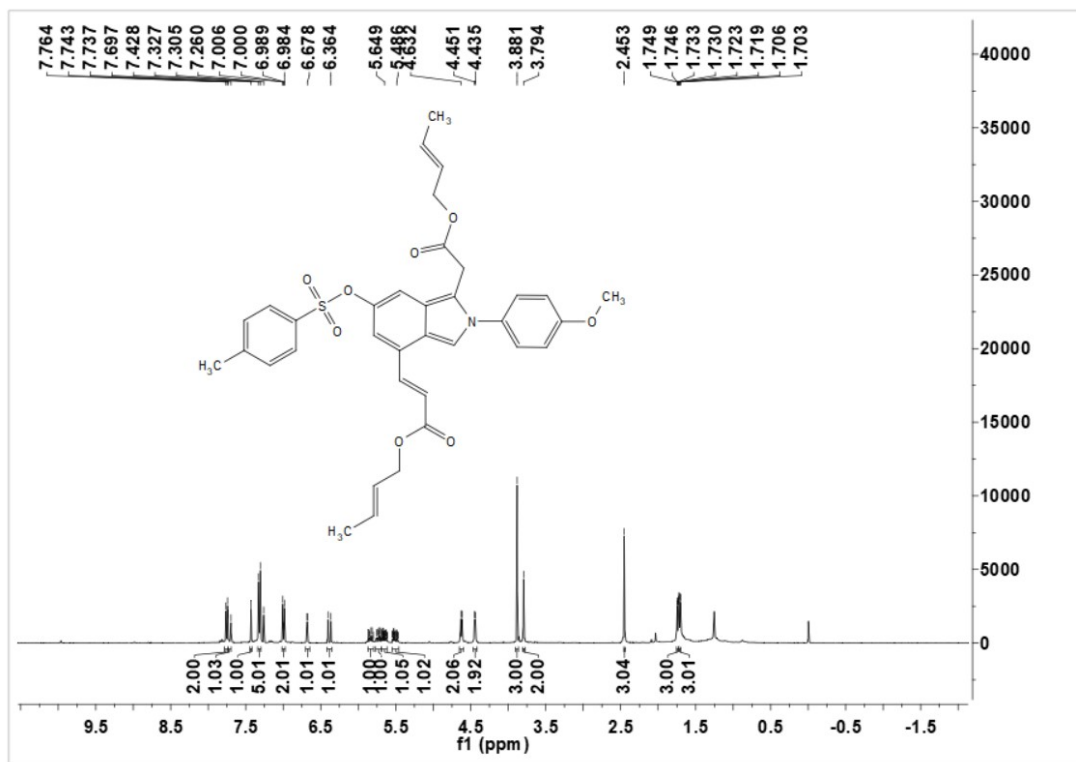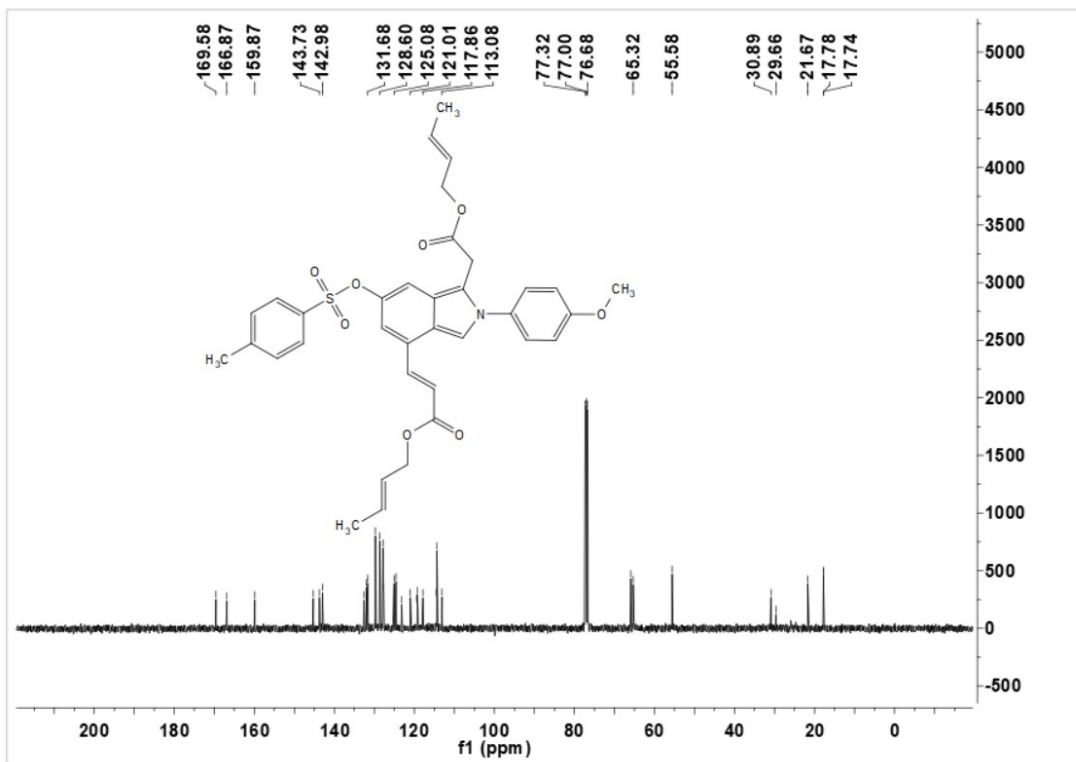

(1*R*, 2*S*, 5*R*)-2-Isopropyl-5-methylcyclohexyl (*E*)-3-(1-(2-(((1*R*,2*S*,5*R*)-2-isopropyl-5-methylcyclohexyl)oxy)-2-oxoethyl)-2-(4-methoxyphenyl)-6-(tosyloxy)-2*H*-isoindol-4-yl)acrylate (6y)

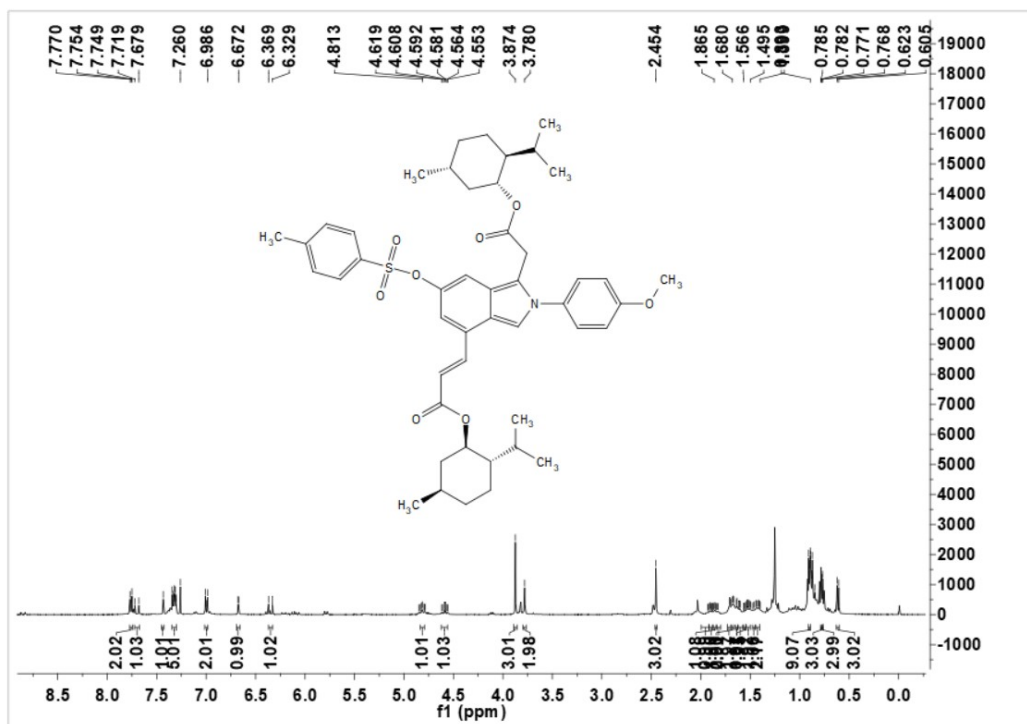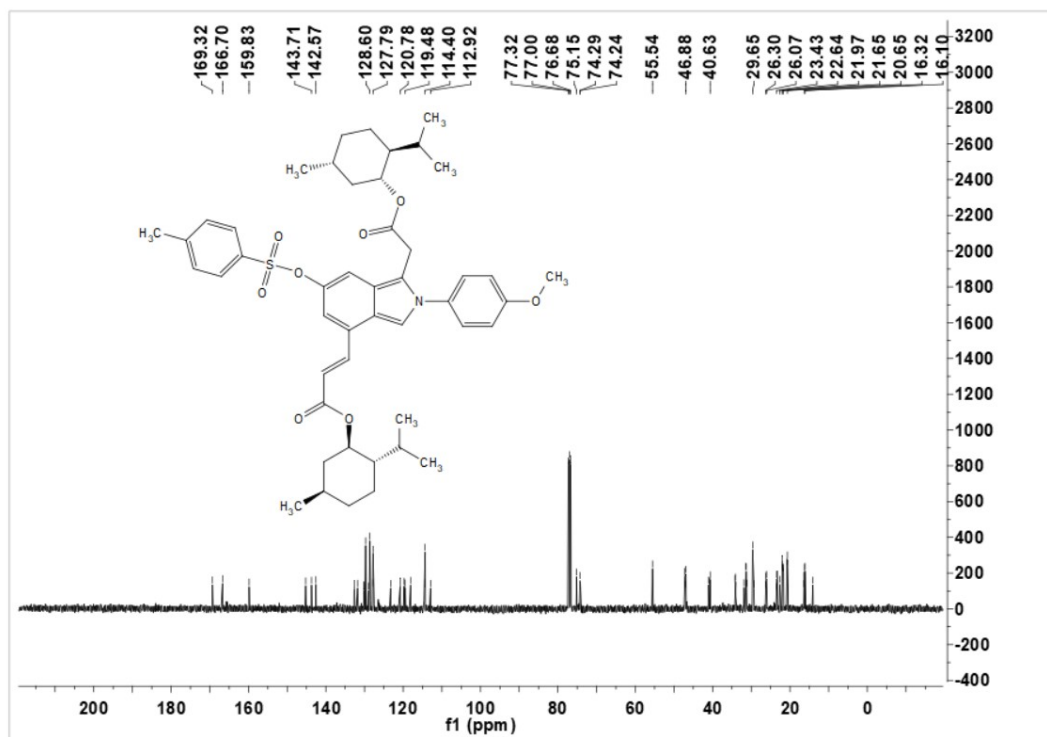

(8*S*,9*S*,10*R*,13*R*,14*S*,17*R*)-10,13-Dimethyl-17-((*R*)-6-methylheptan-2-yl)-  
 2,3,4,7,8,9,10,11,12,13,14,15,16,17-tetradecahydro-1*H*-cyclopenta[*a*]phenanthren-3-yl (*E*)-3-(1-  
 (2-(((8*S*,9*S*,10*R*,13*R*,14*S*,17*R*)-10,13-dimethyl-17-((*R*)-6-methylheptan-2-yl)-  
 2,3,4,7,8,9,10,11,12,13,14,15,16,17-tetradecahydro-1*H*-cyclopenta[*a*]phenanthren-3-yl)oxy)-2-  
 oxoethyl)-6-(*N,N*-dipropylsulfamoyl)-2-(4-methoxyphenyl)-2*H*-isoindol-4-yl)acrylate (6z)

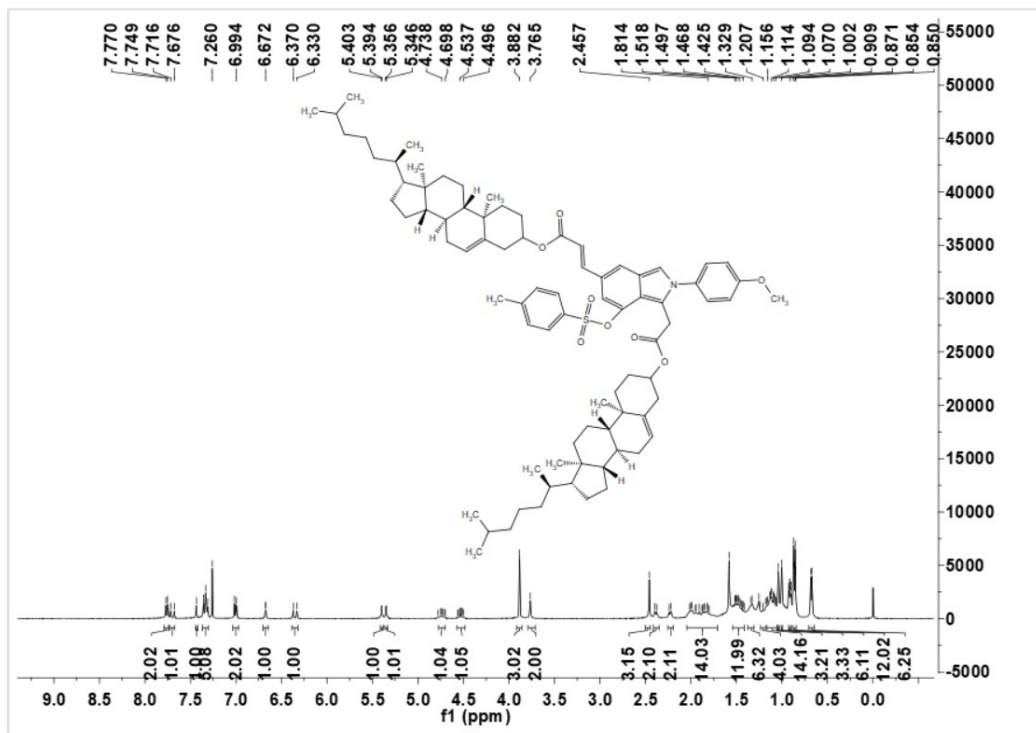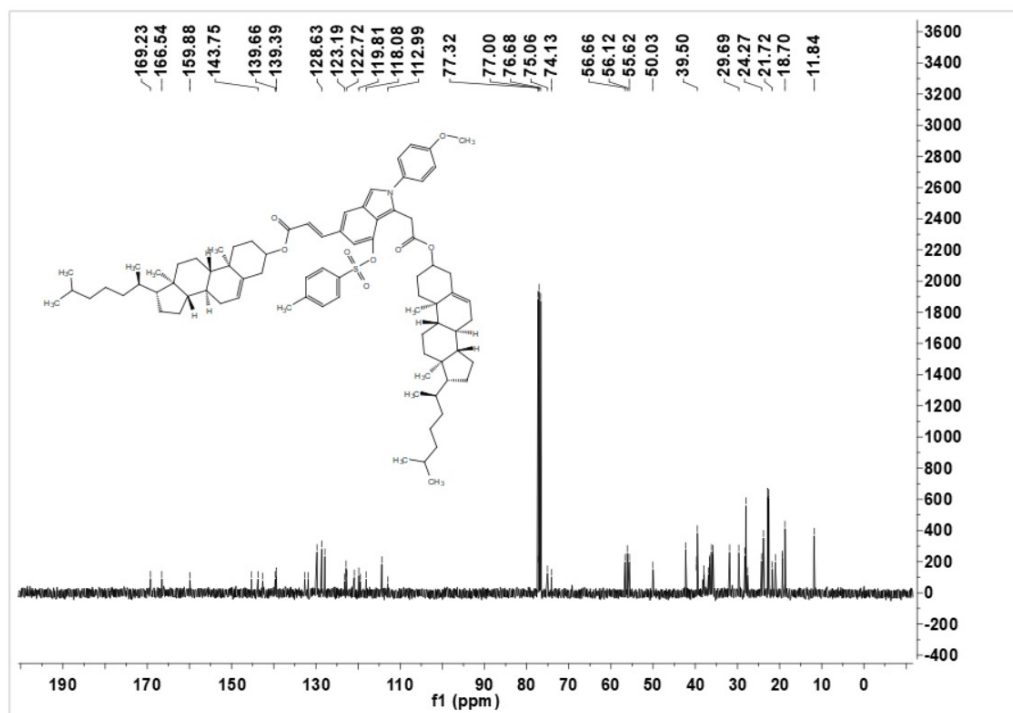

**(E)-3-(2-Methoxy-2-oxoethyl)-7-(3-methoxy-3-oxoprop-1-en-1-yl)-2-(4-methoxyphenyl)-2H-isoindol-5-yl 4-(N,N-dipropylsulfamoyl)benzoate (6za)**

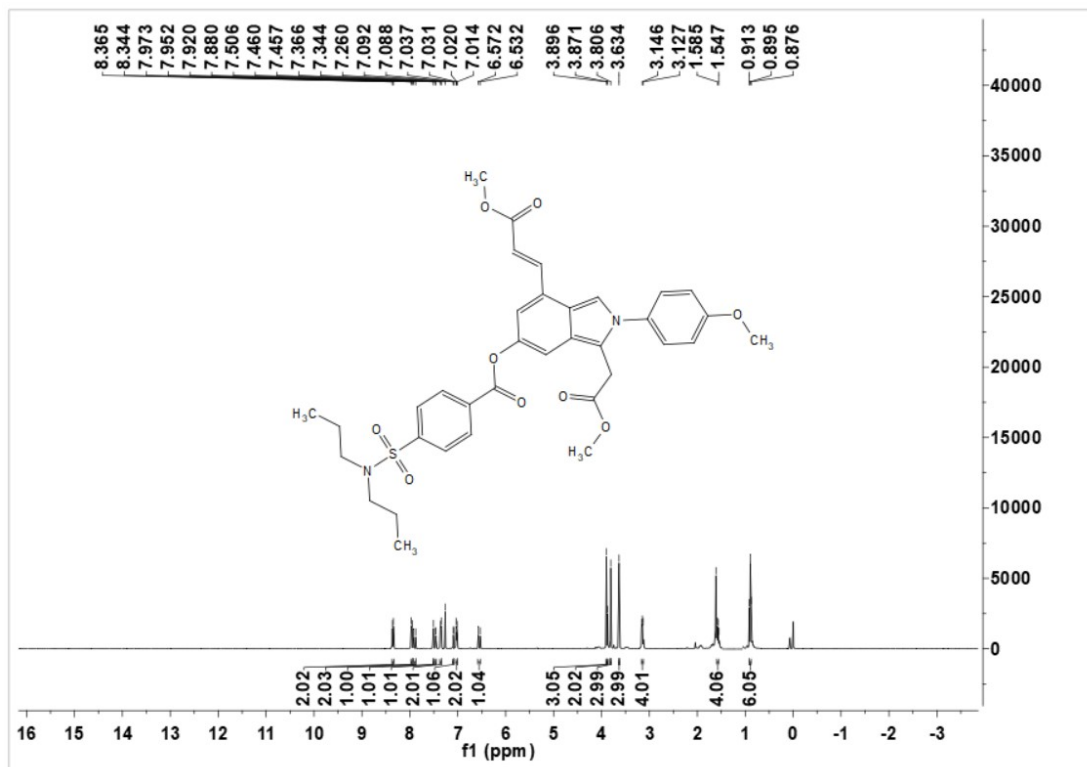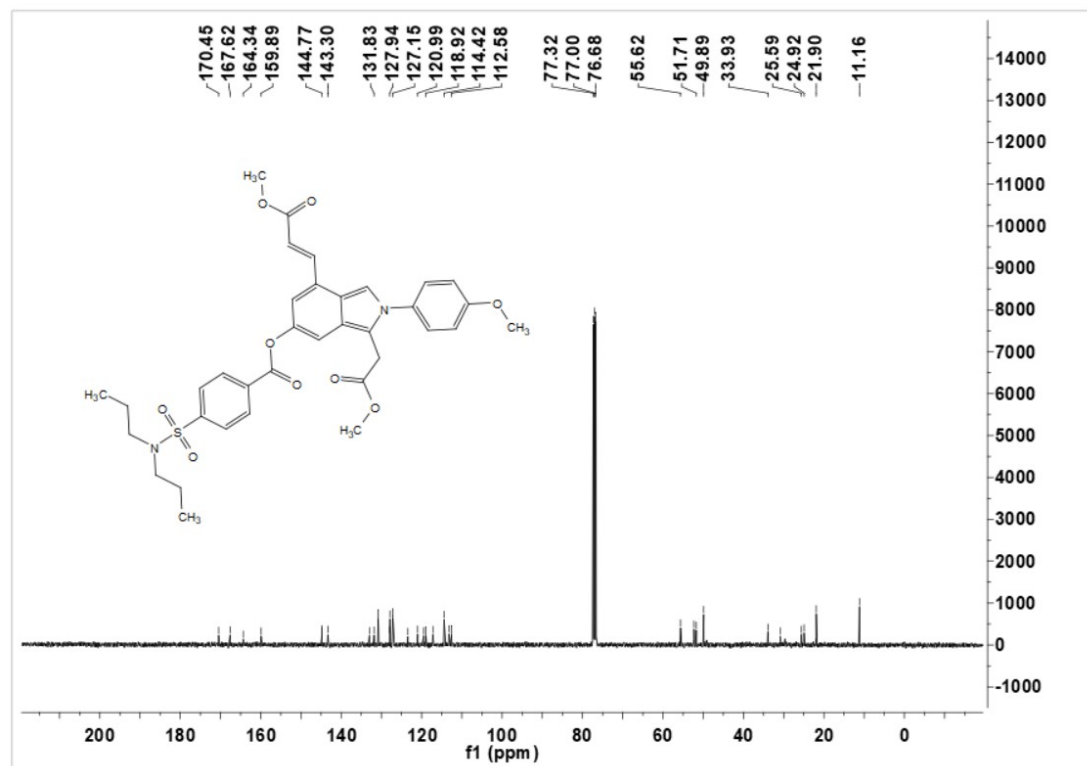

**4-Bromophenyl 2-(4-chloro-2-(4-methoxyphenyl)-2H-pyrrolo[3,4-c]pyridin-1-yl)acetate (6zb)**

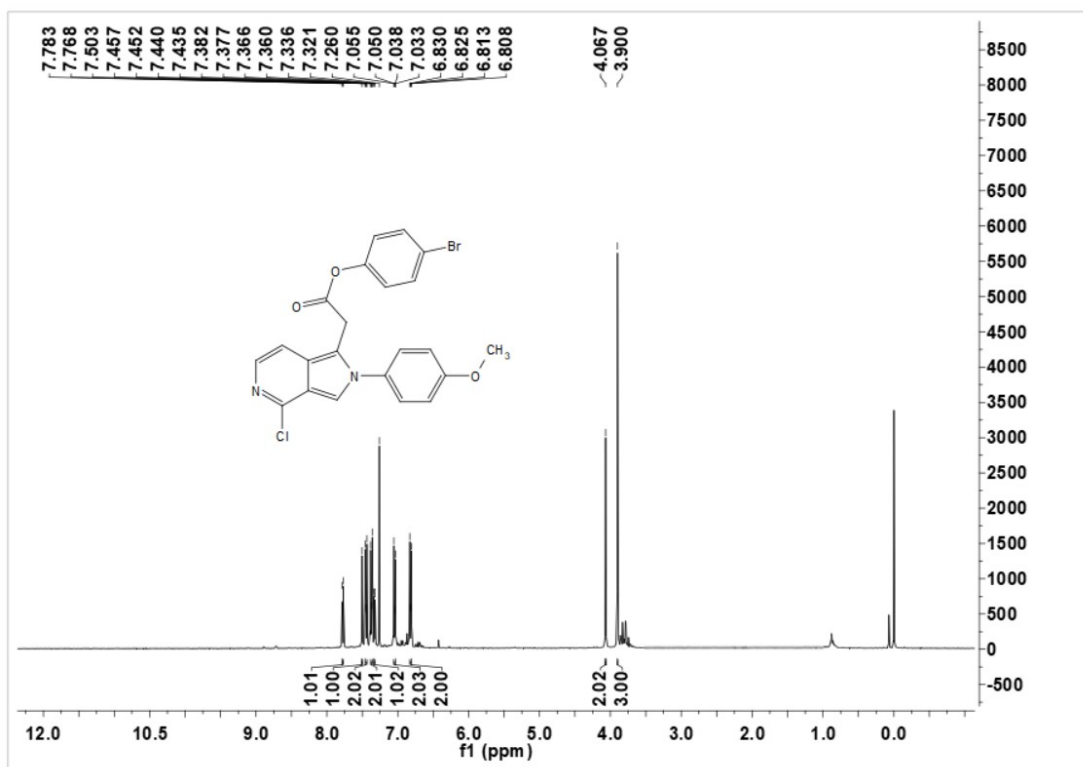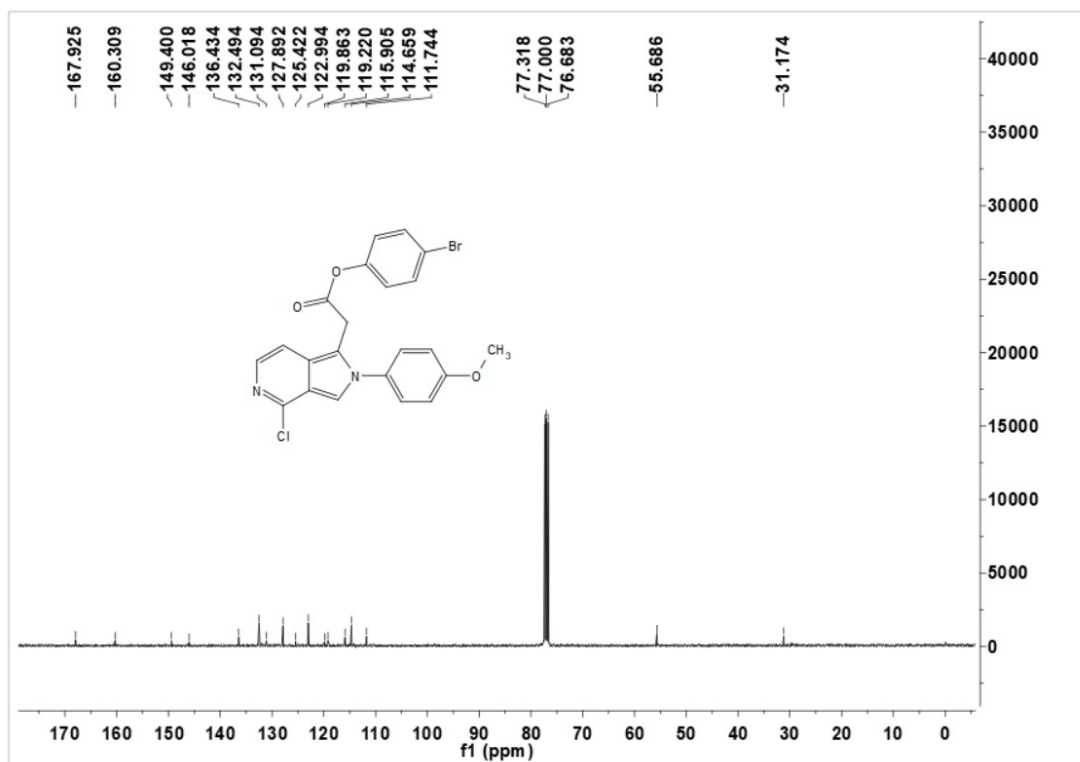

4-Acetylphenyl 2-(4-chloro-2-(4-methoxyphenyl)-2H-pyrrolo[3,4-c]pyridin-1-yl)acetate (6zc)

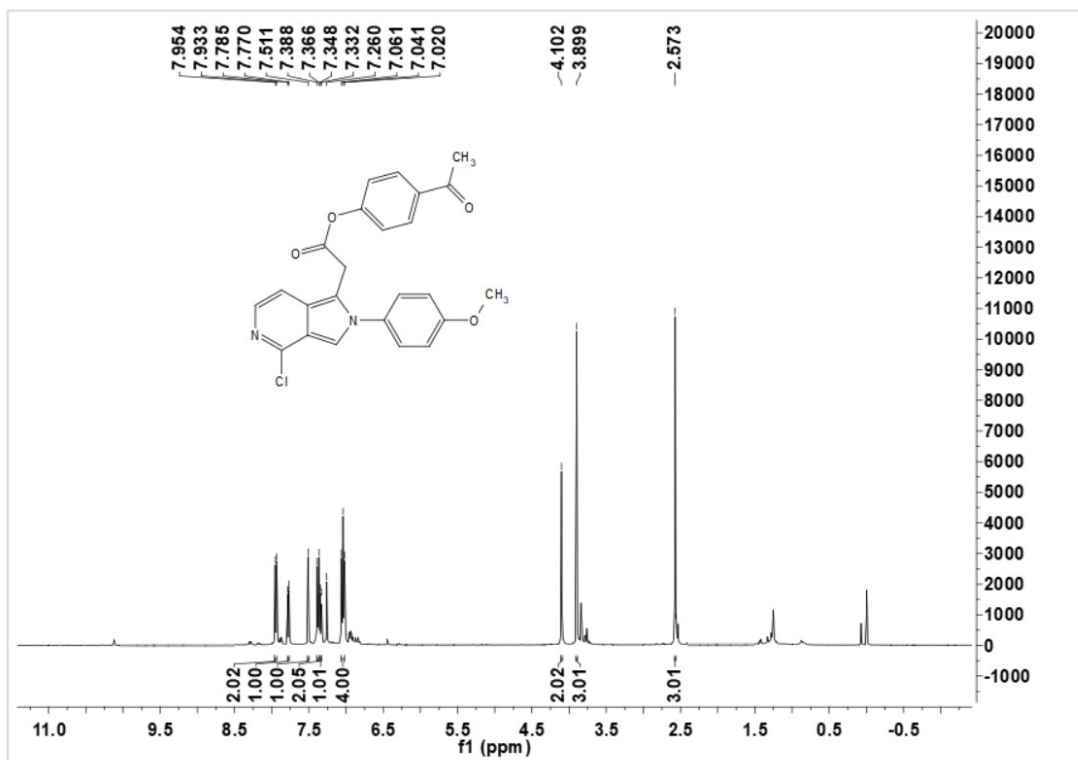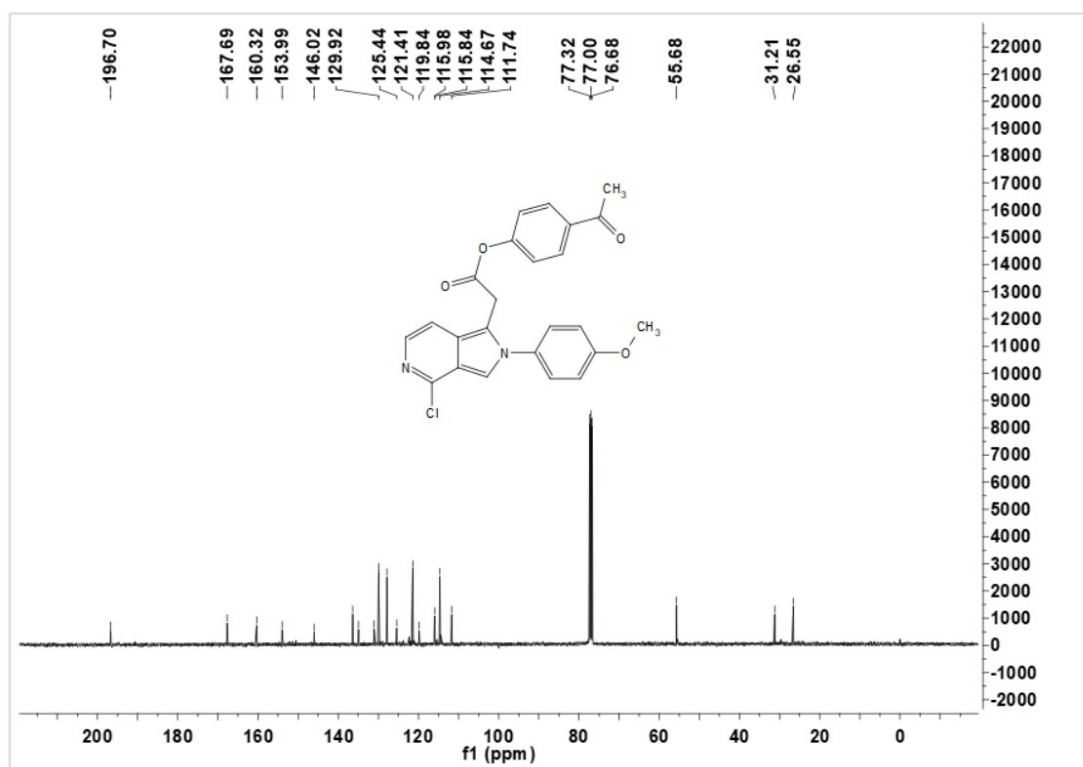



**4-Chlorophenyl 2-(4-chloro-2-(4-methoxyphenyl)-2H-pyrrolo[3,4-c]pyridin-1-yl)acetate (6zd)**

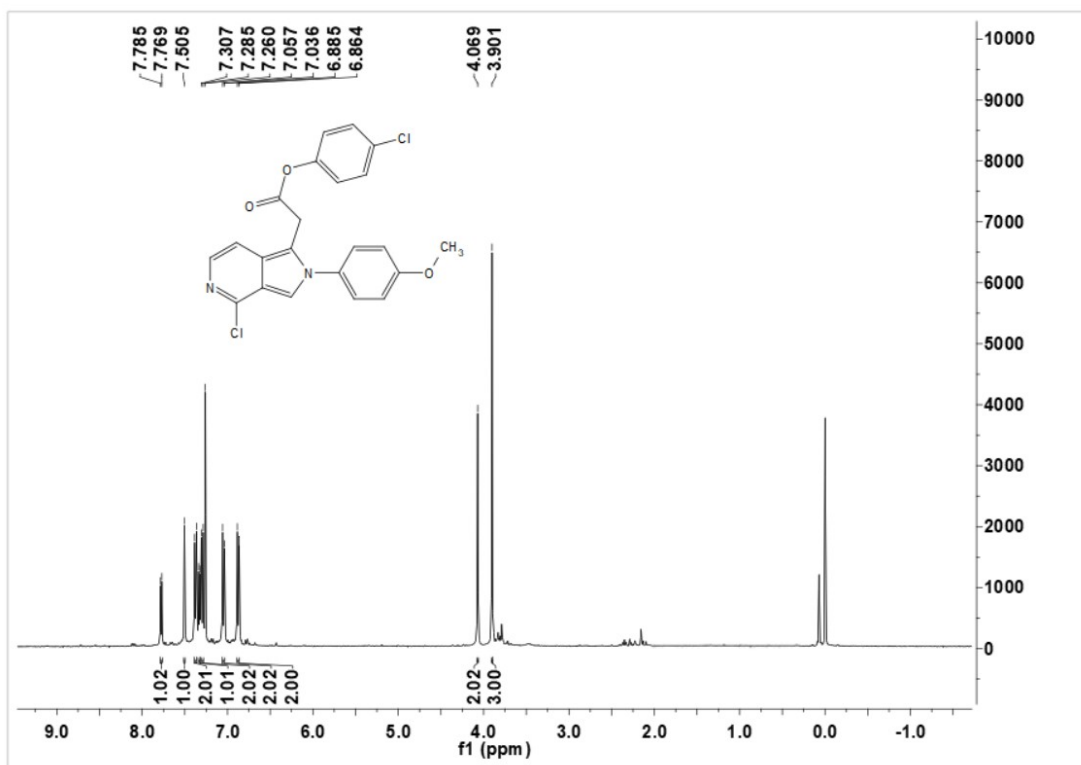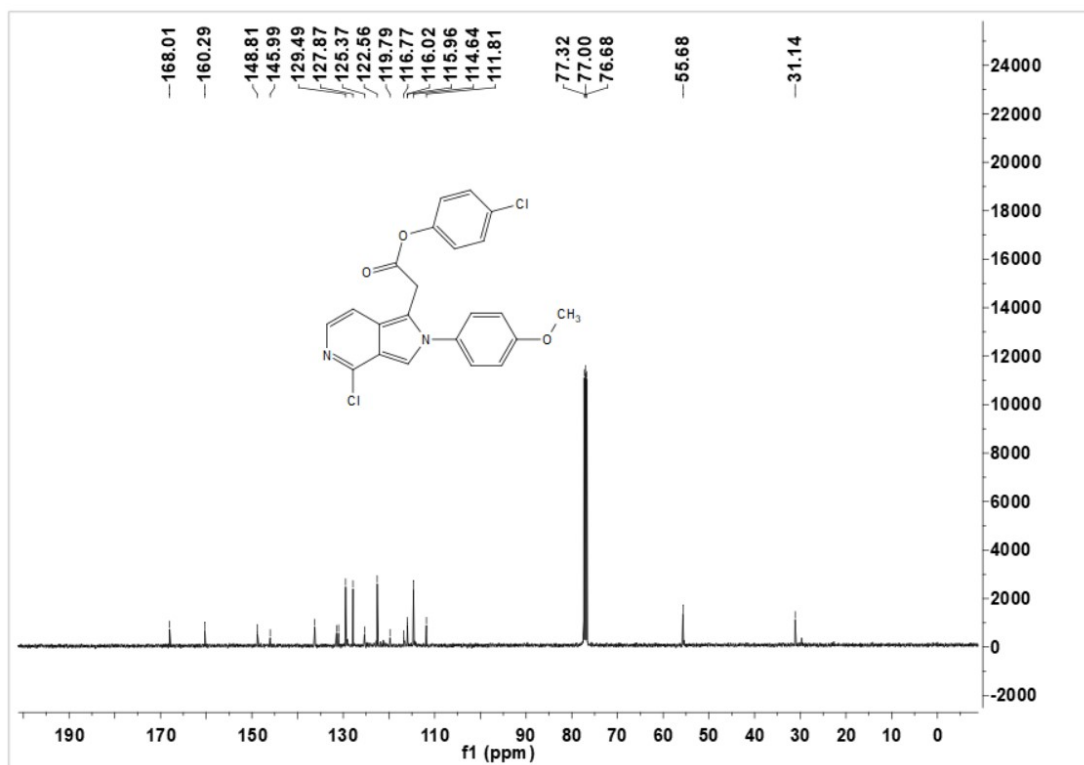

**4-Methoxyphenyl 2-(4-chloro-2-(4-methoxyphenyl)-2H-pyrrolo[3,4-c]pyridin-1-yl)acetate (6ze)**

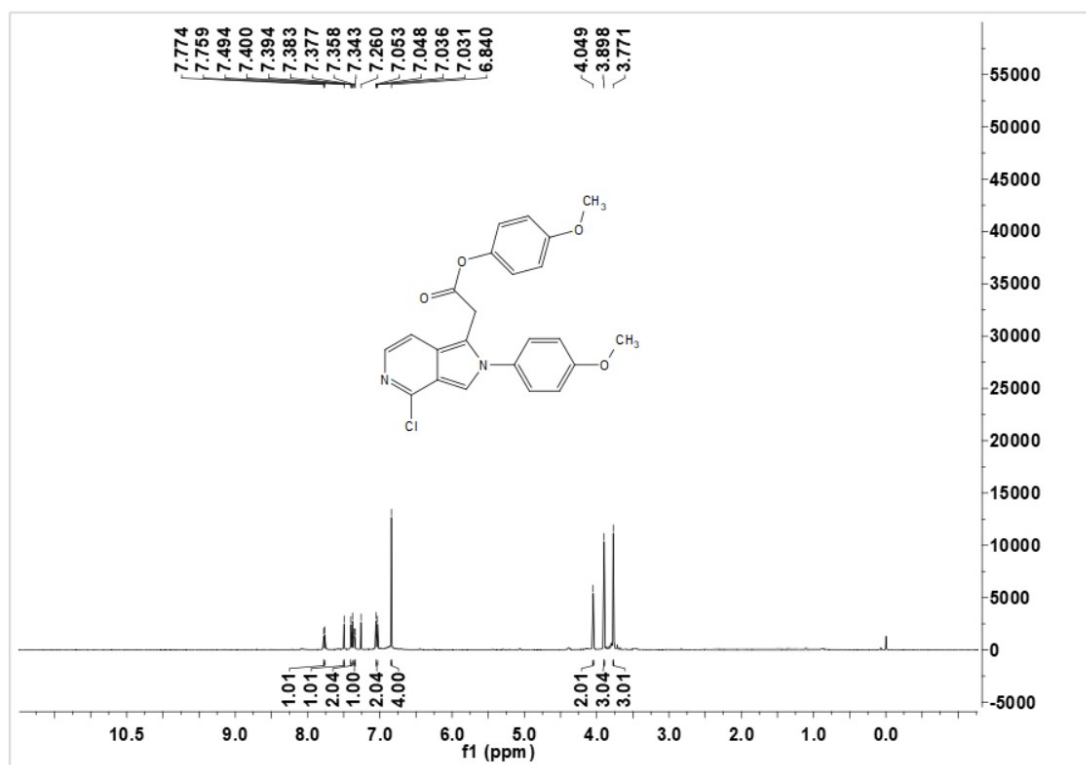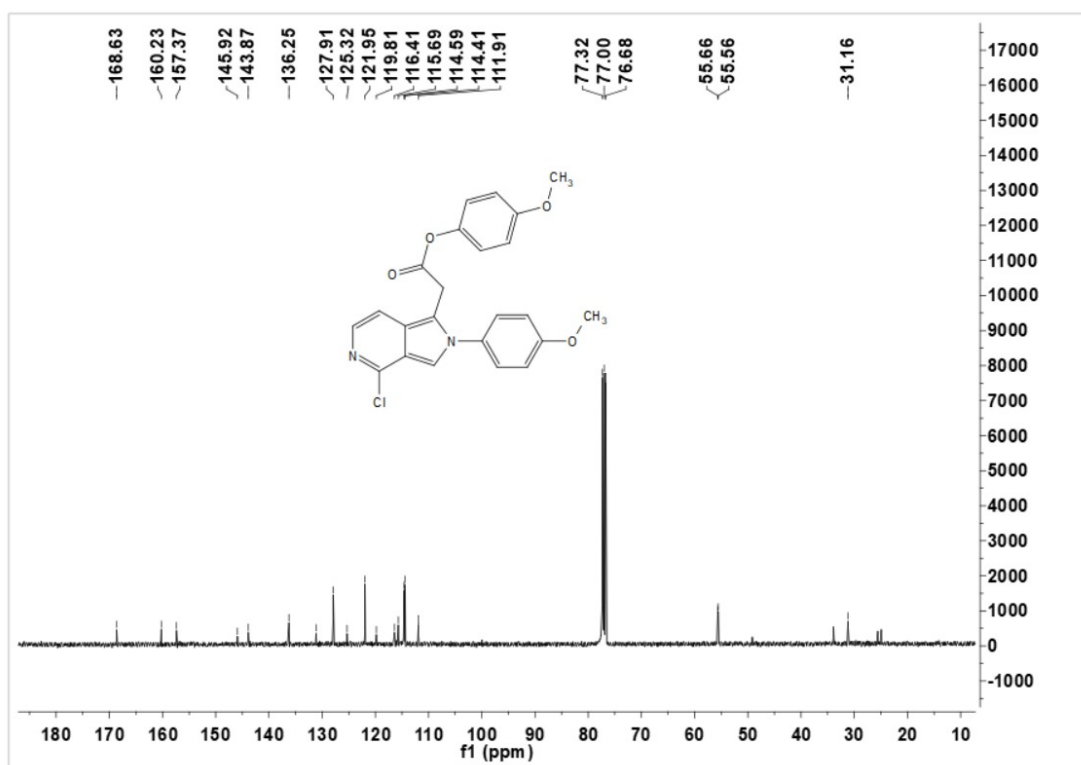

Methyl 3-(4-(2-(4-chloro-2-(4-methoxyphenyl)-2H-pyrrolo[3,4-c]pyridin-1-yl)acetoxy)phenyl)propanoate (6zf)

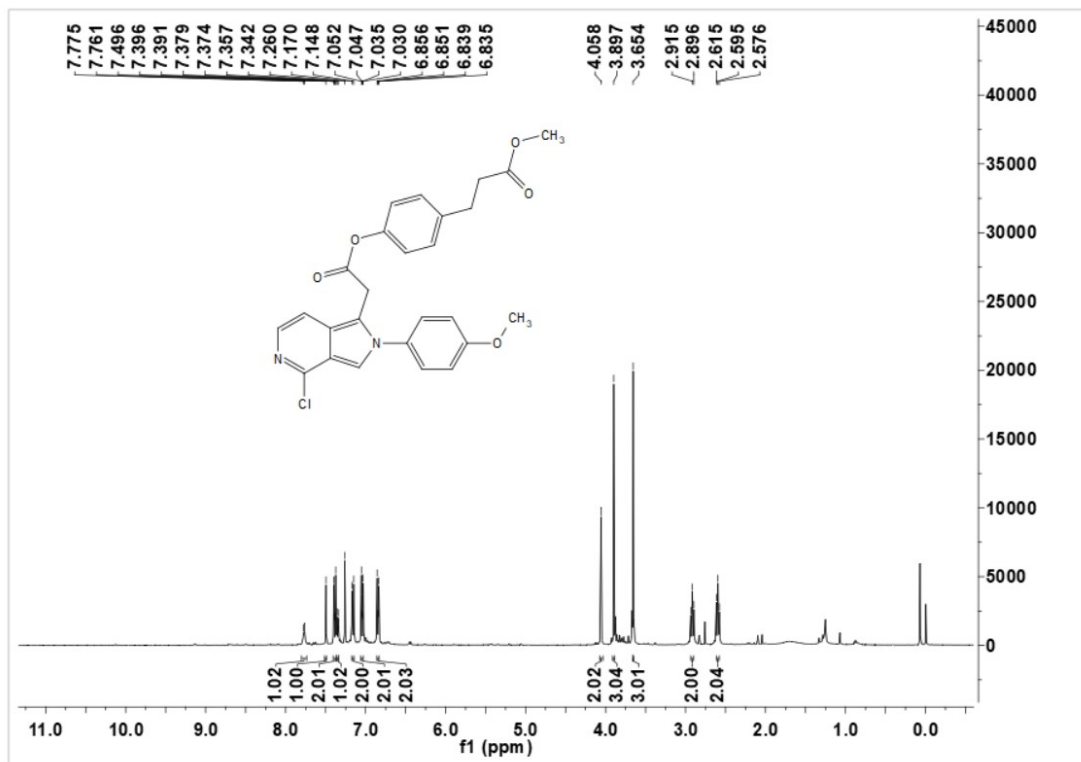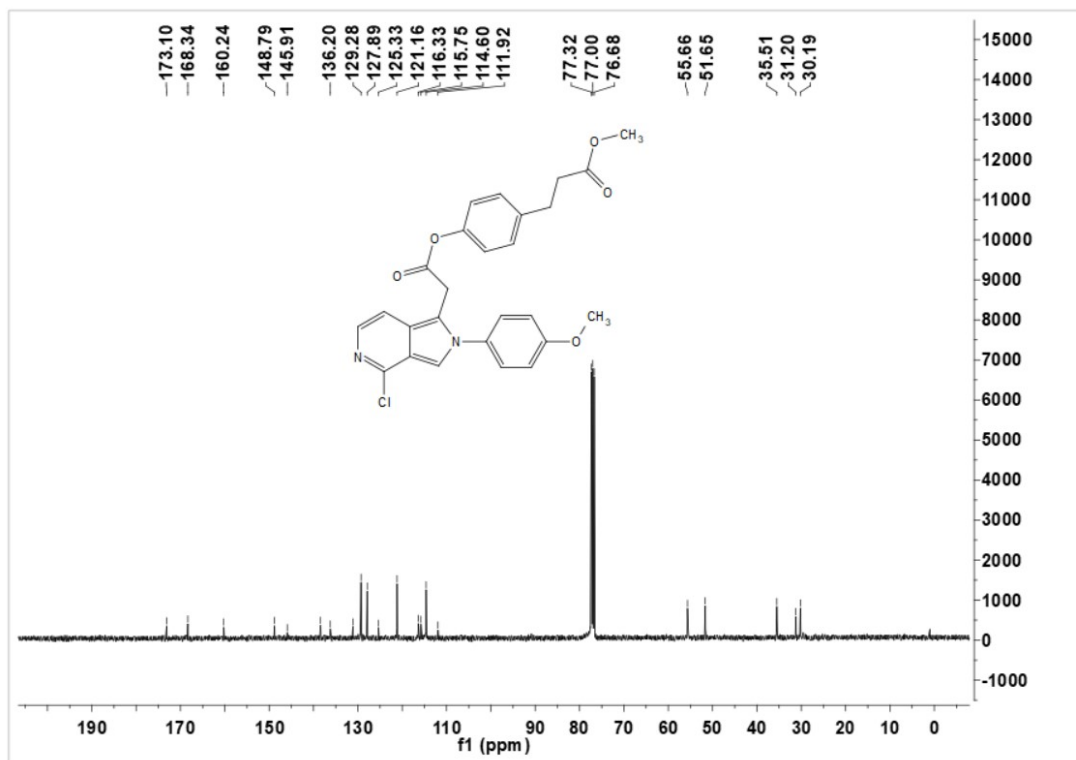

Methyl 3-(4-(2-(4-((1-benzylpiperidin-4-yl)methoxy)-2-(4-methoxyphenyl)-2H-pyrrolo[3,4-c]pyridin-1-yl)acetoxy)phenyl)propanoate (6zf-I)

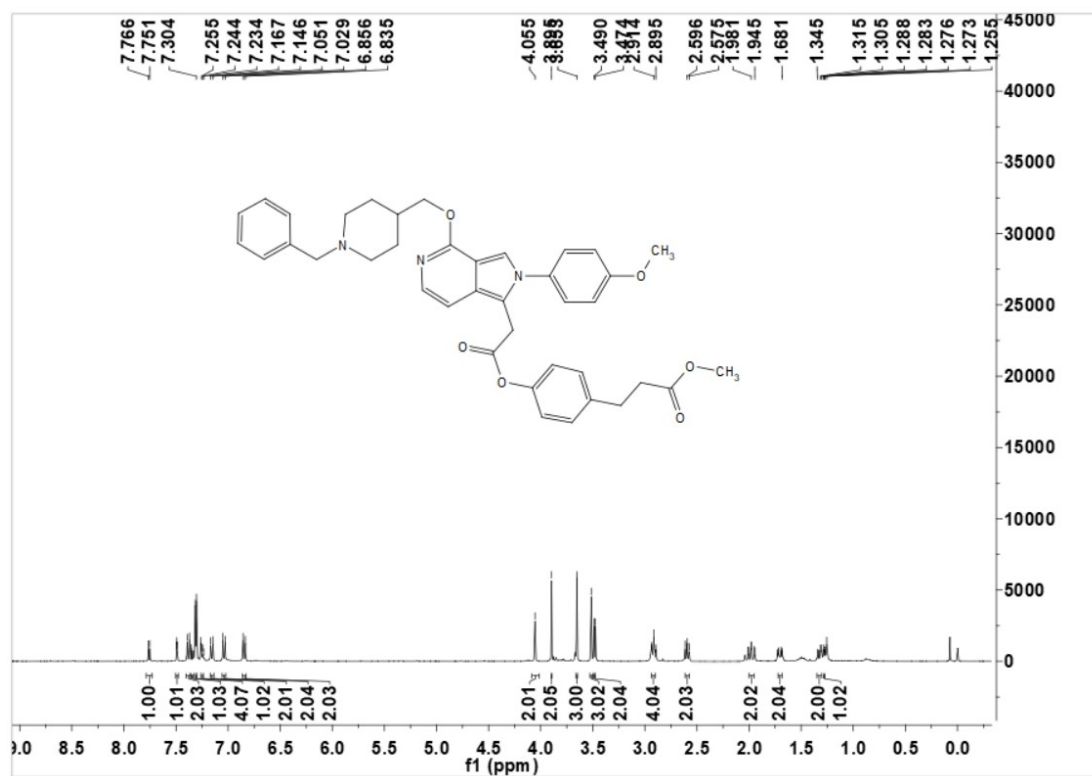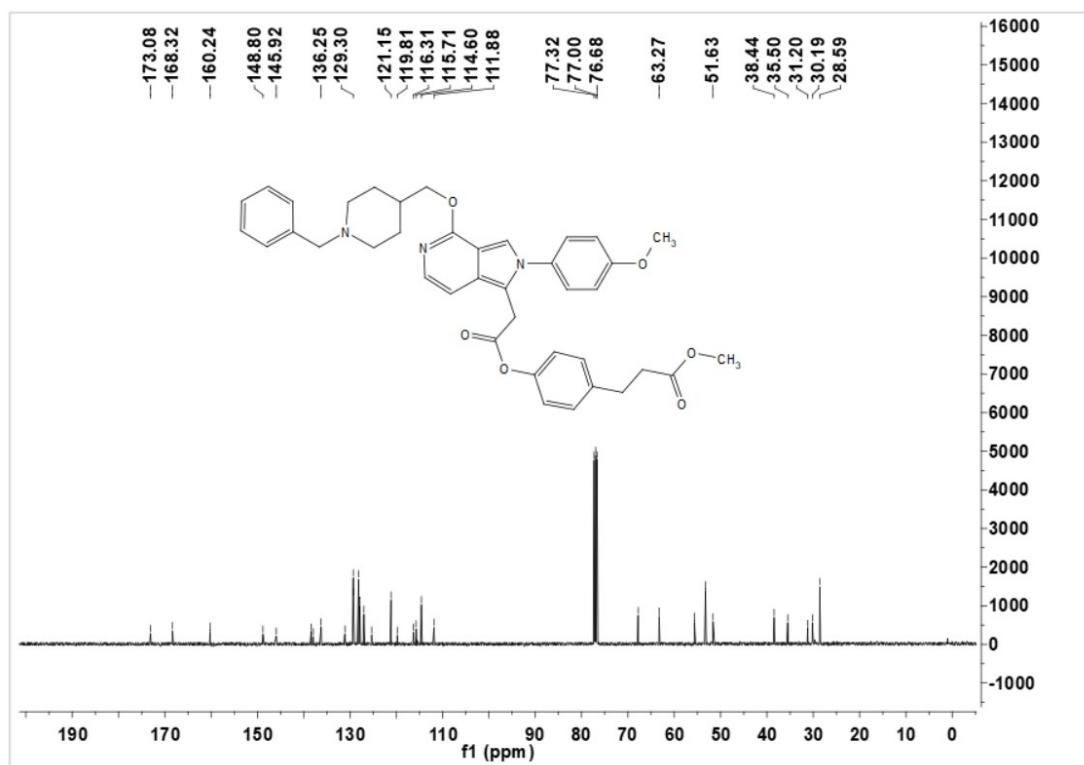

1-((1*E*,3*Z*)-2-Phenyl-3-(phenylimino)isoindolin-1-ylidene)propan-2-one (8a)

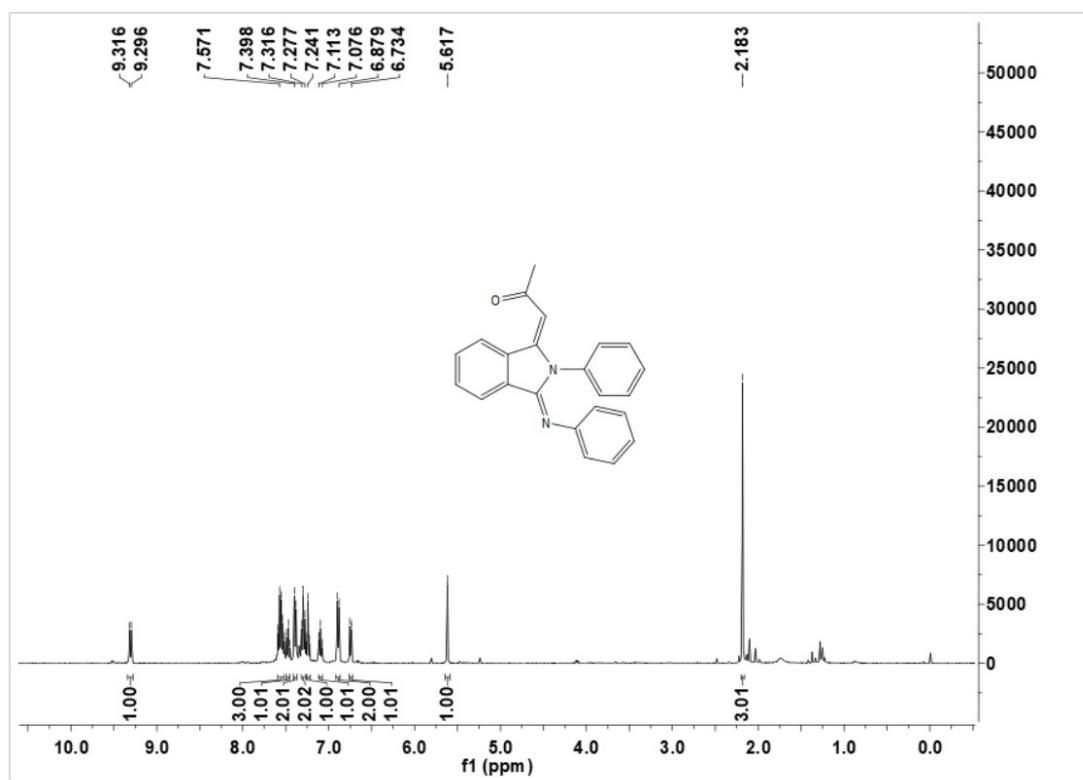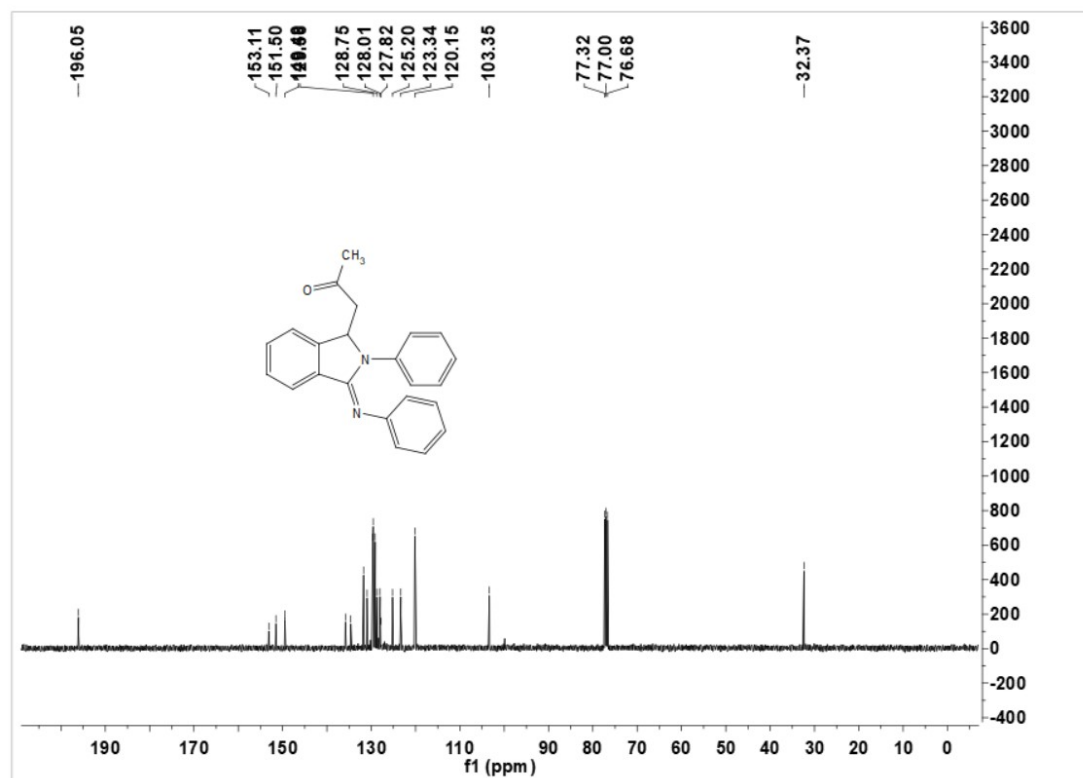

1-((1*E*,3*Z*)-6-Methyl-2-phenyl-3-(phenylimino)isoindolin-1-ylidene)propan-2-one  
(8b)

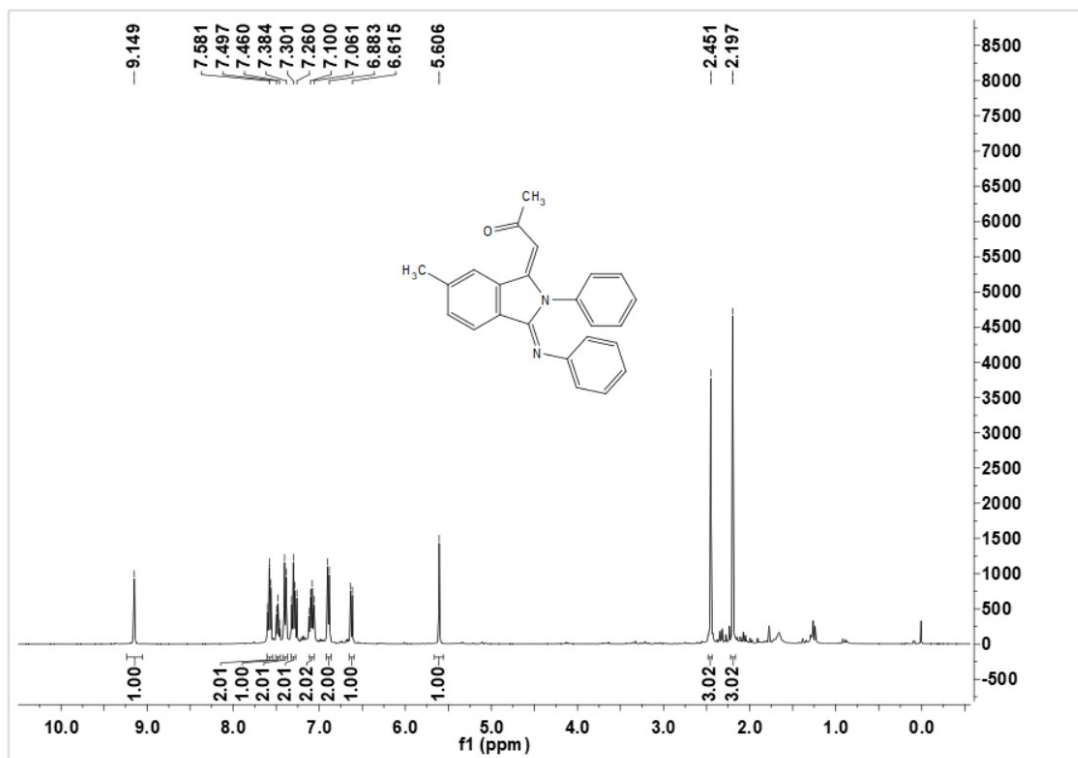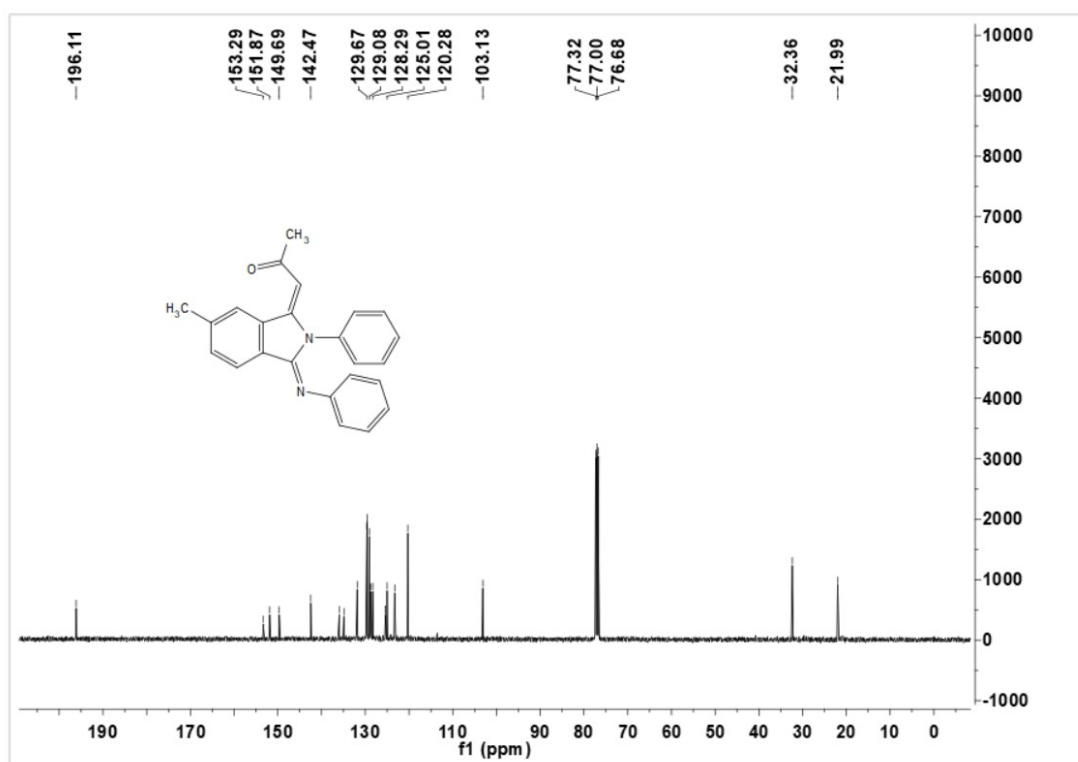

1-((1*E*,3*Z*)-6-Bromo-2-phenyl-3-(phenylimino)isoindolin-1-ylidene)propan-2-one  
(8c)

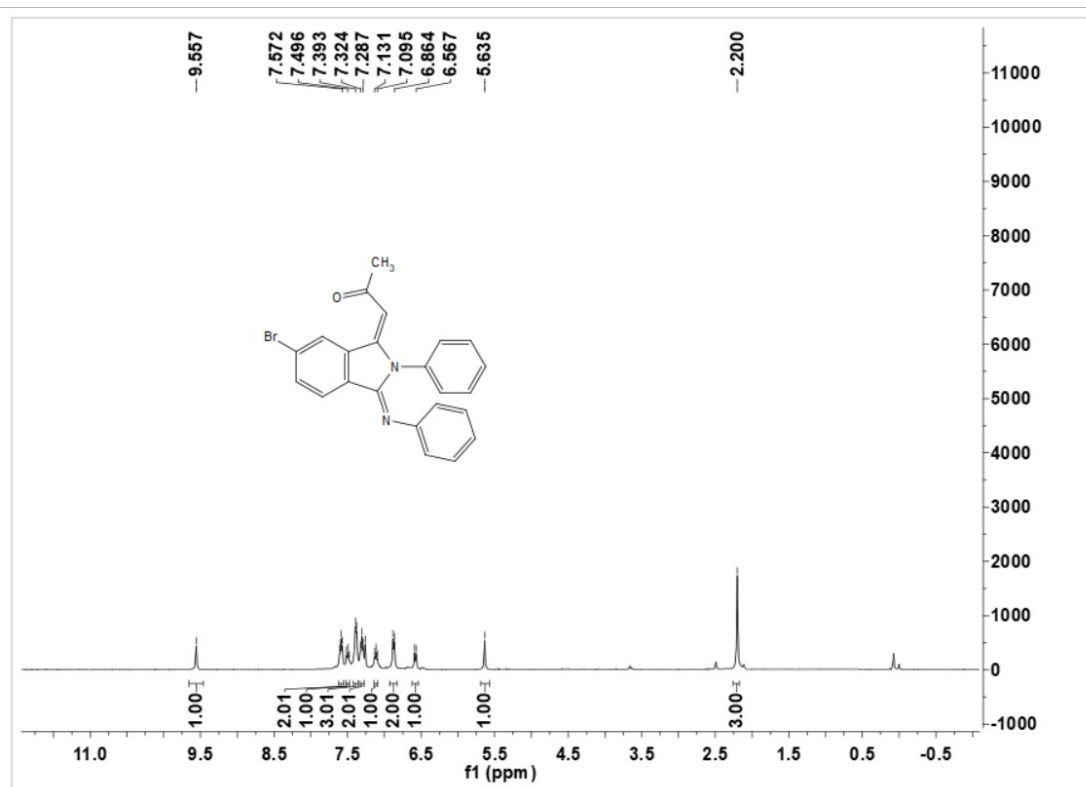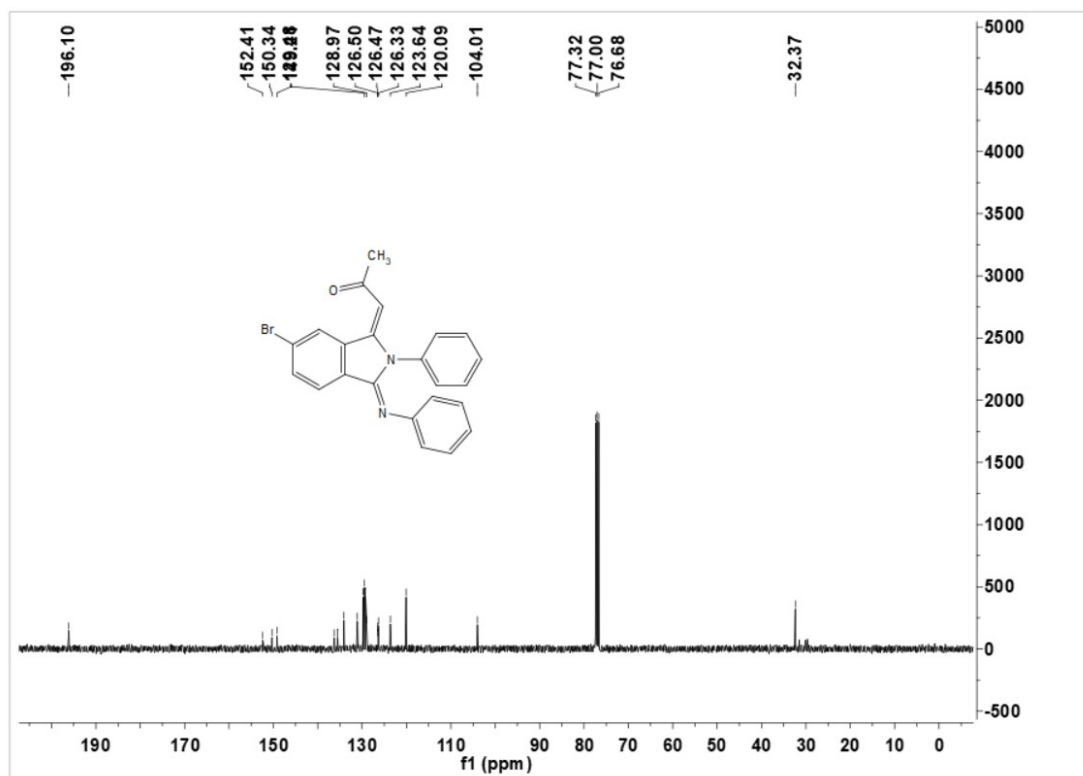

1-((1*E*, 3*Z*)-6-Nitro-2-phenyl-3-(phenylimino)isoindolin-1-ylidene)propan-2-one  
(8d)

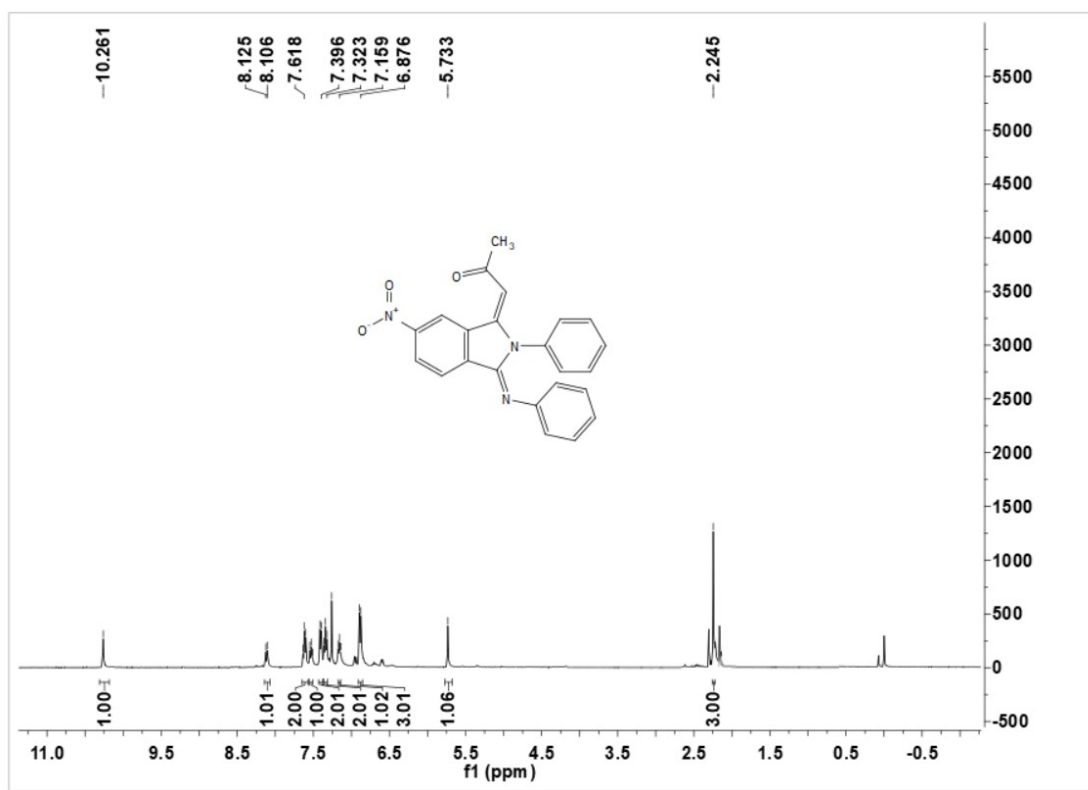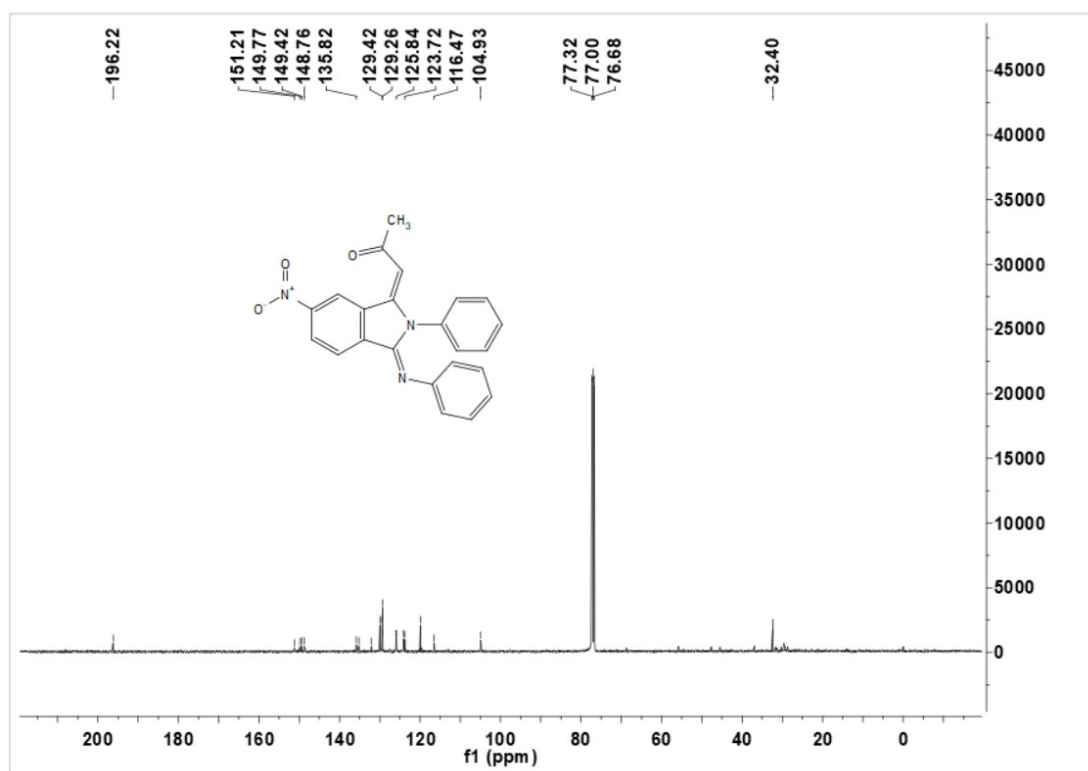



1-((1*E*,3*Z*)-2-Phenyl-3-(phenylimino)-5-(trifluoromethyl)isoindolin-1-ylidene)propan-2-one (8e)

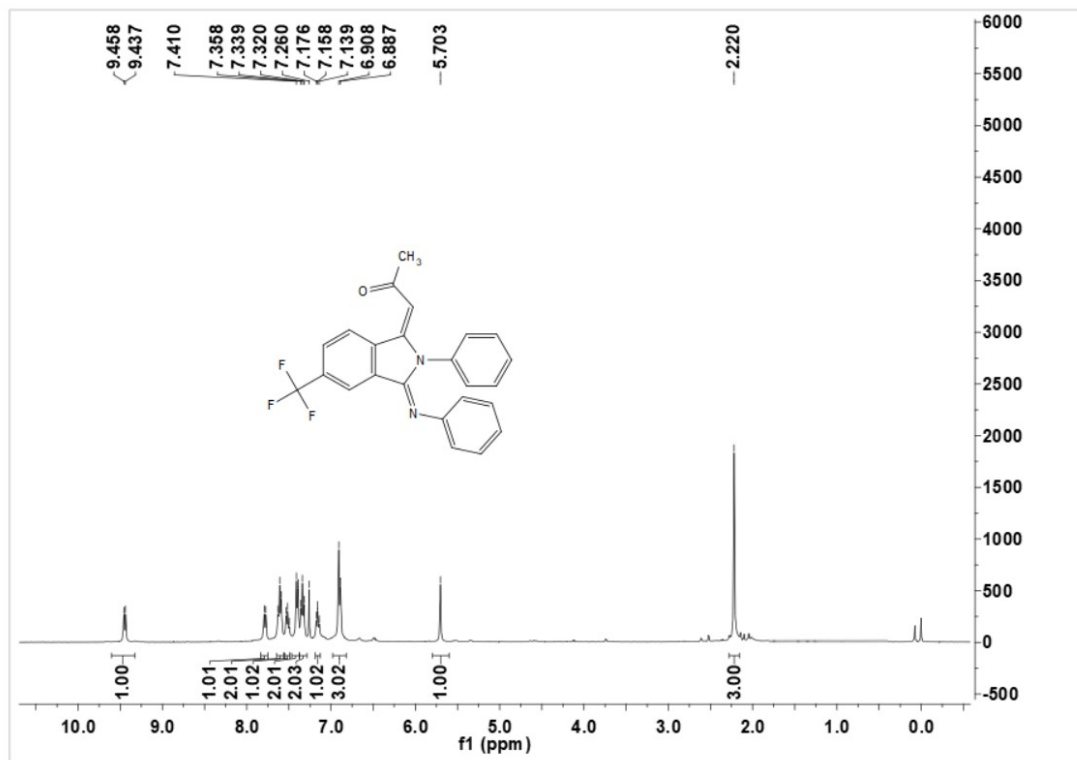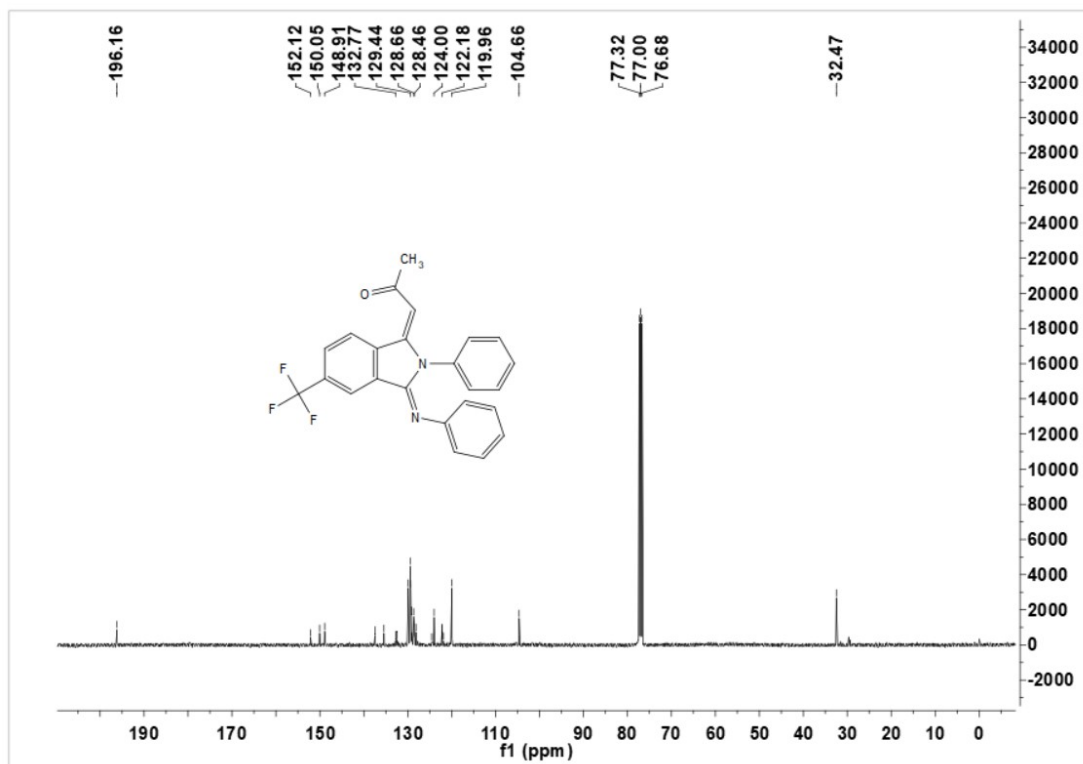

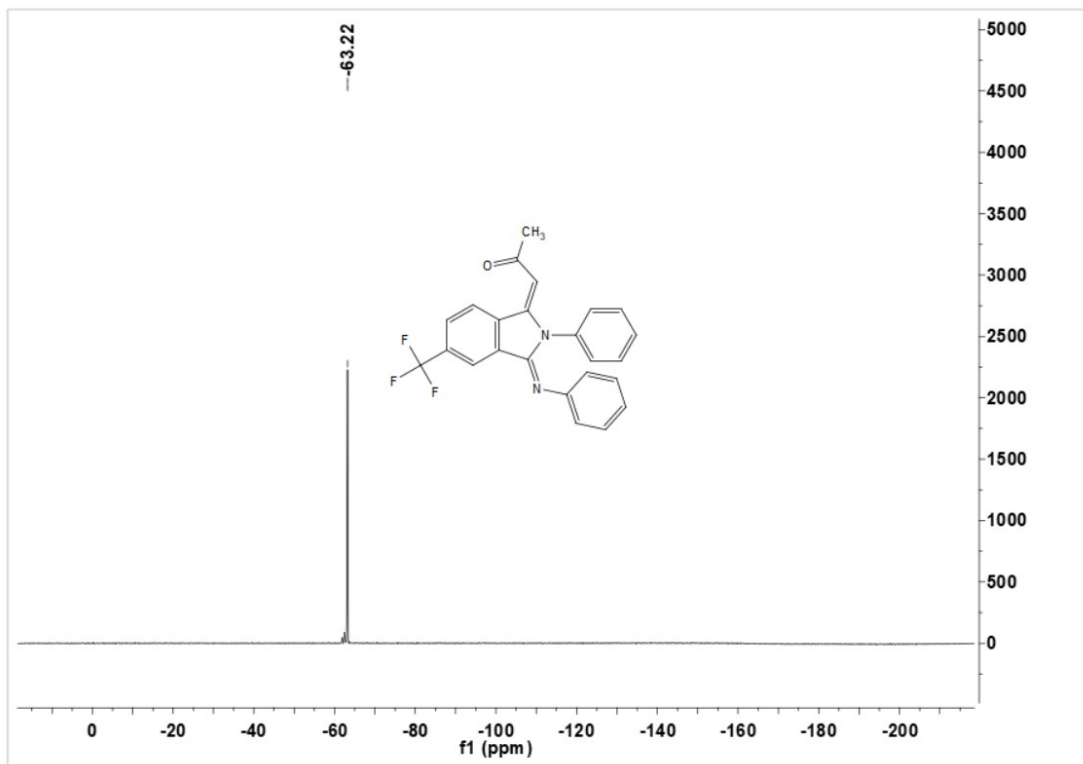

**1-((1E,3Z)-6-Fluoro-2-(4-methoxyphenyl)-3-((4-methoxyphenyl)imino)isoindolin-1-ylidene)propan-2-one (8f)**

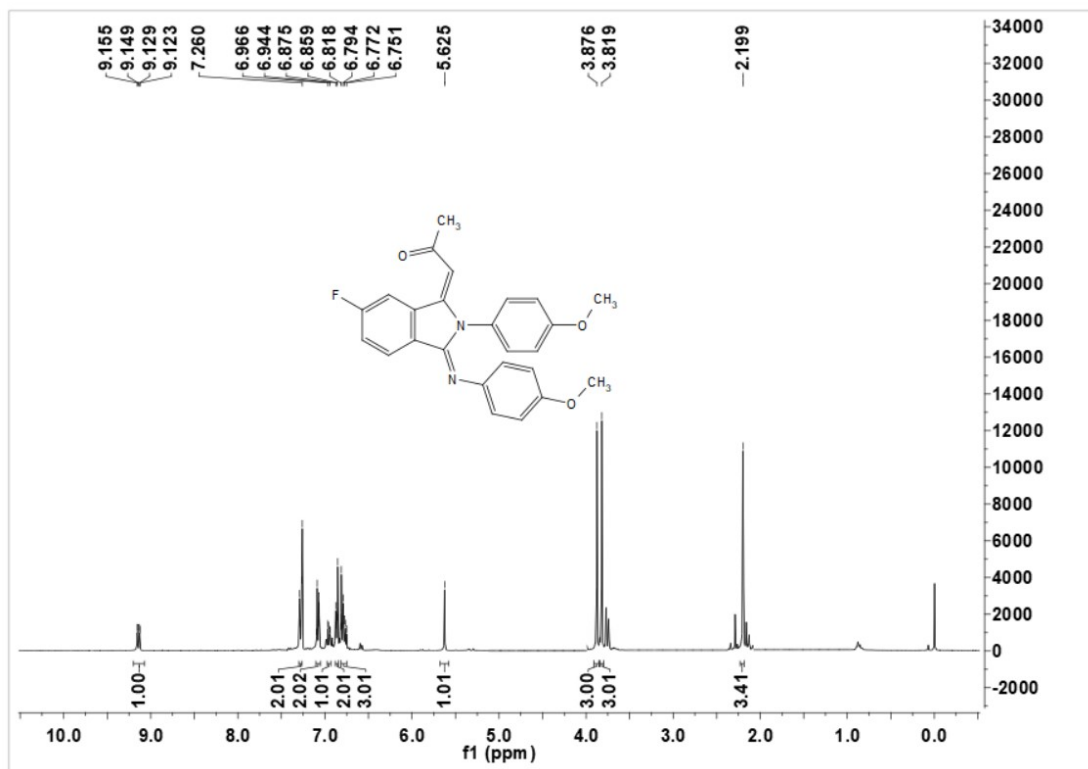

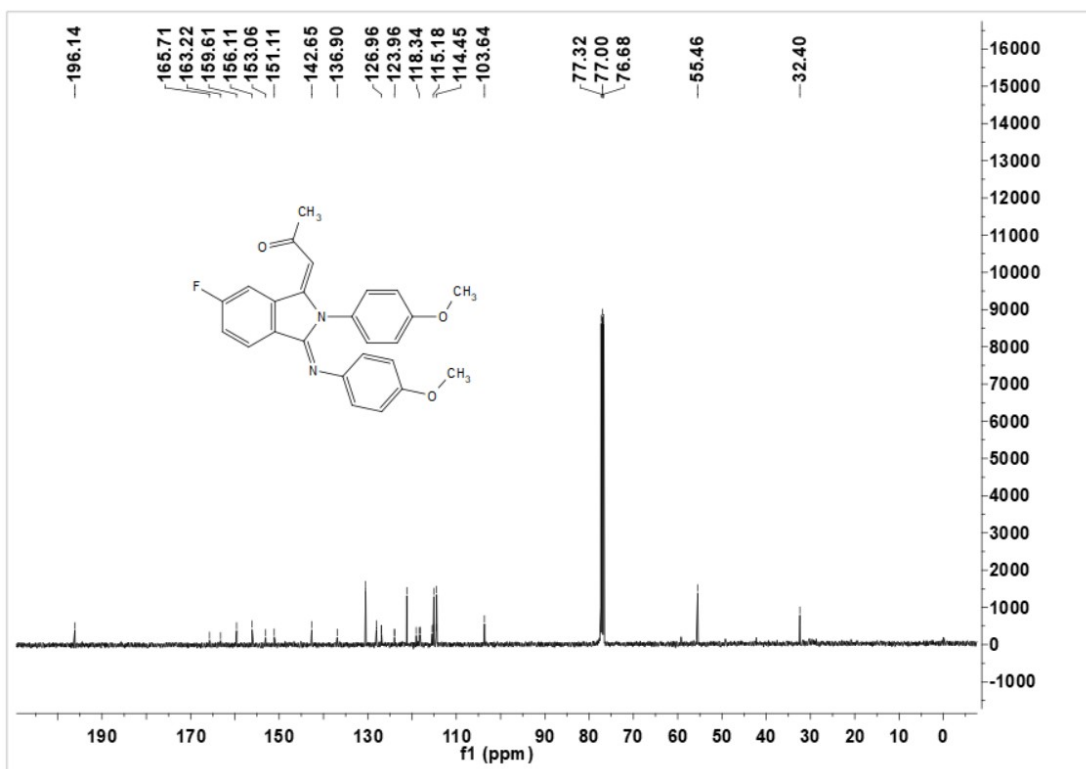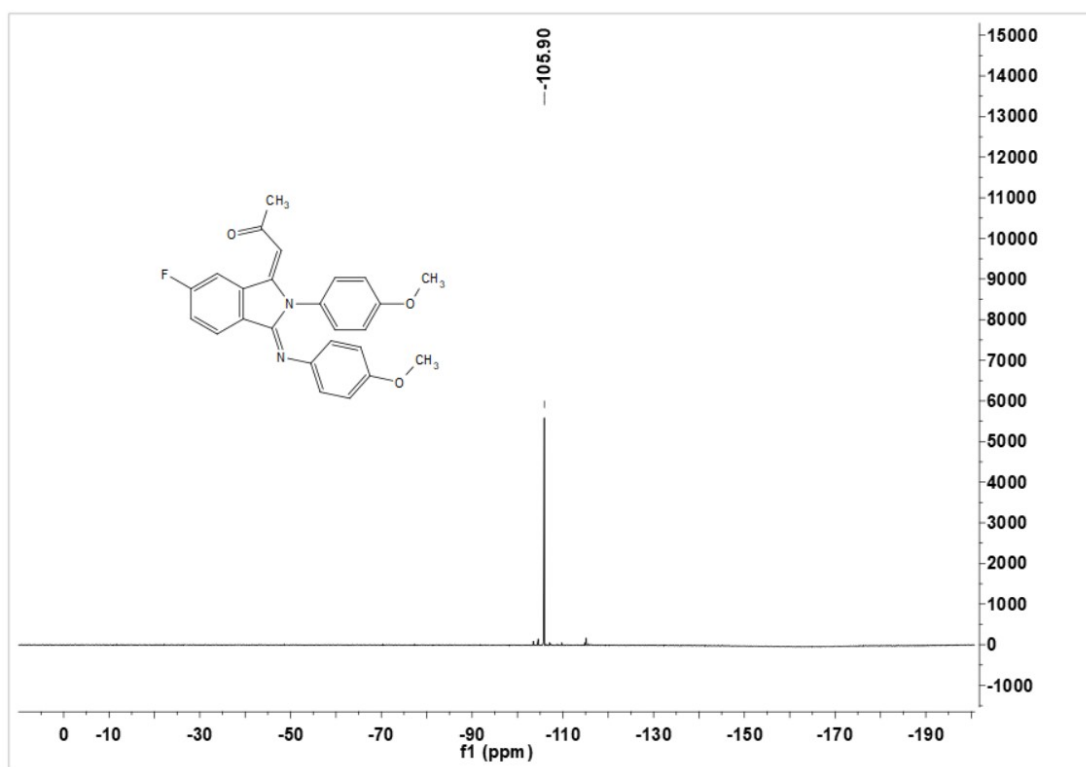

**1-((1*E*,3*Z*)-2-(4-Bromophenyl)-3-((4-bromophenyl)imino)-6-Fluoro-isoindolin-1-ylidene)propan-2-one (8g)**

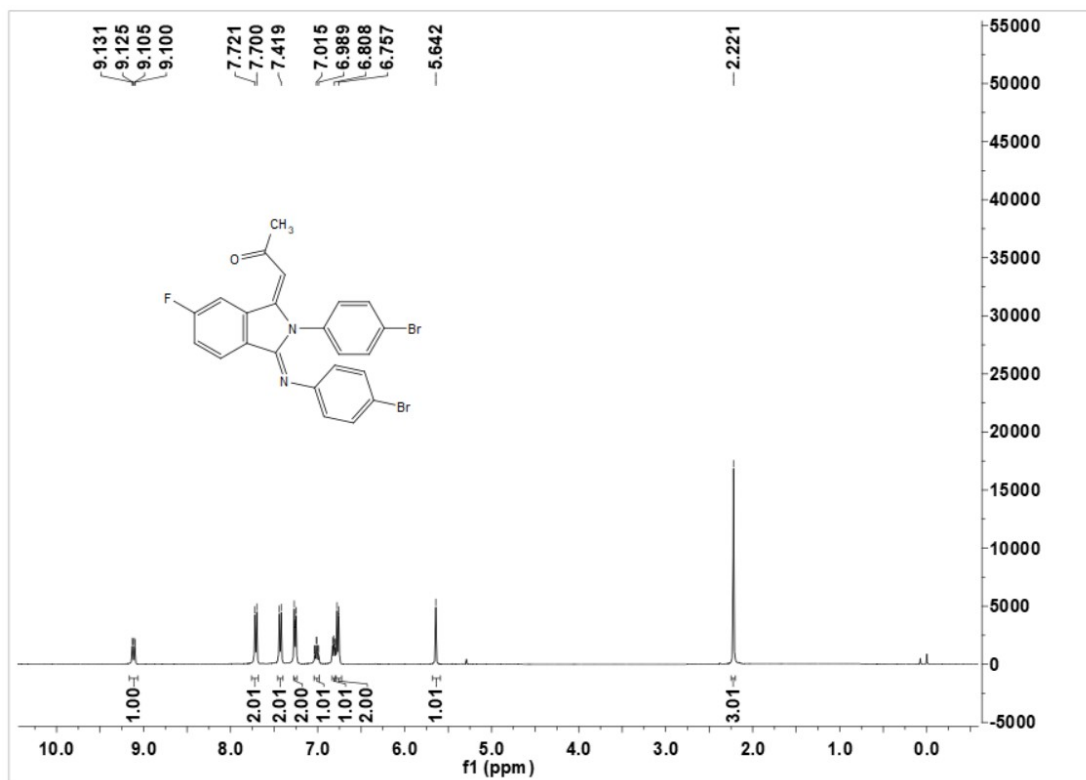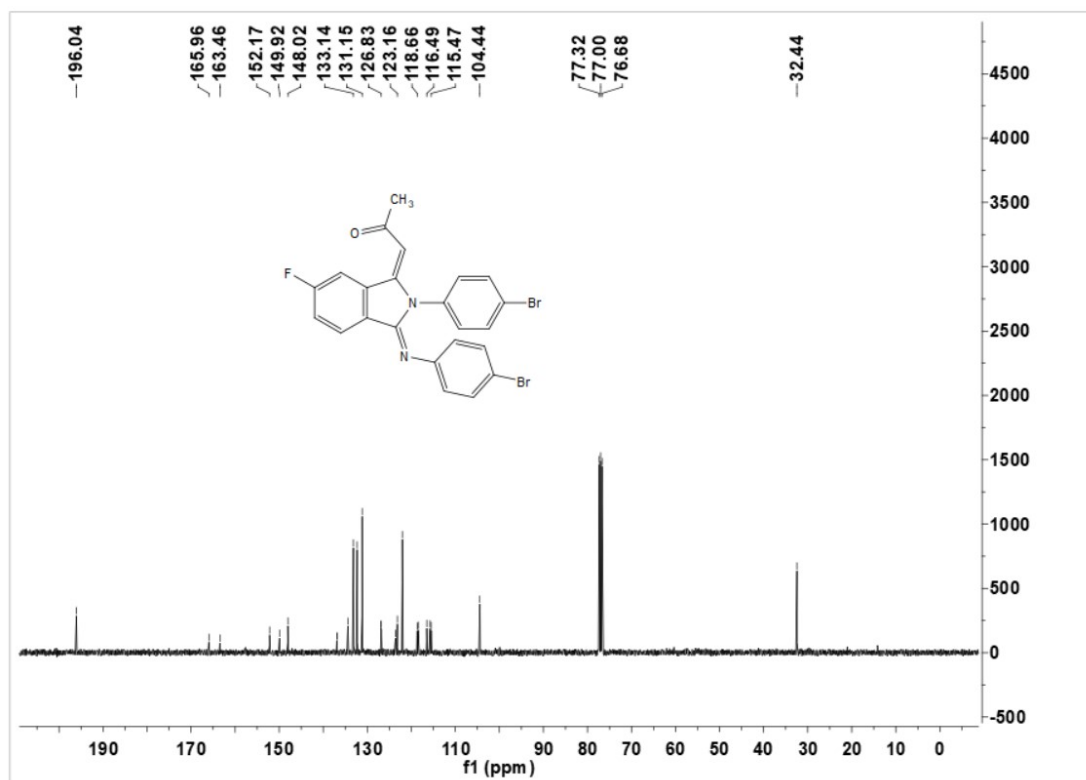

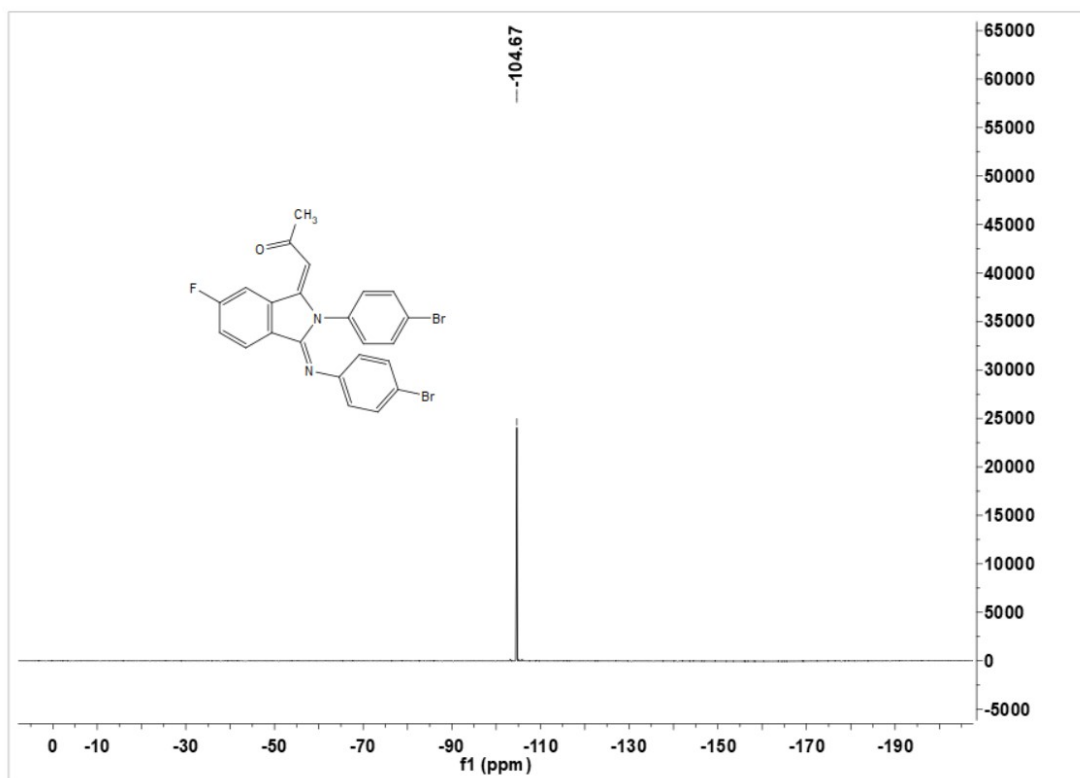

**1-((1*E*,3*Z*)-6-Fluoro-2-(4-iodophenyl)-3-((4-iodophenyl)imino)isoindolin-1-ylidene)propan-2-one (8h)**

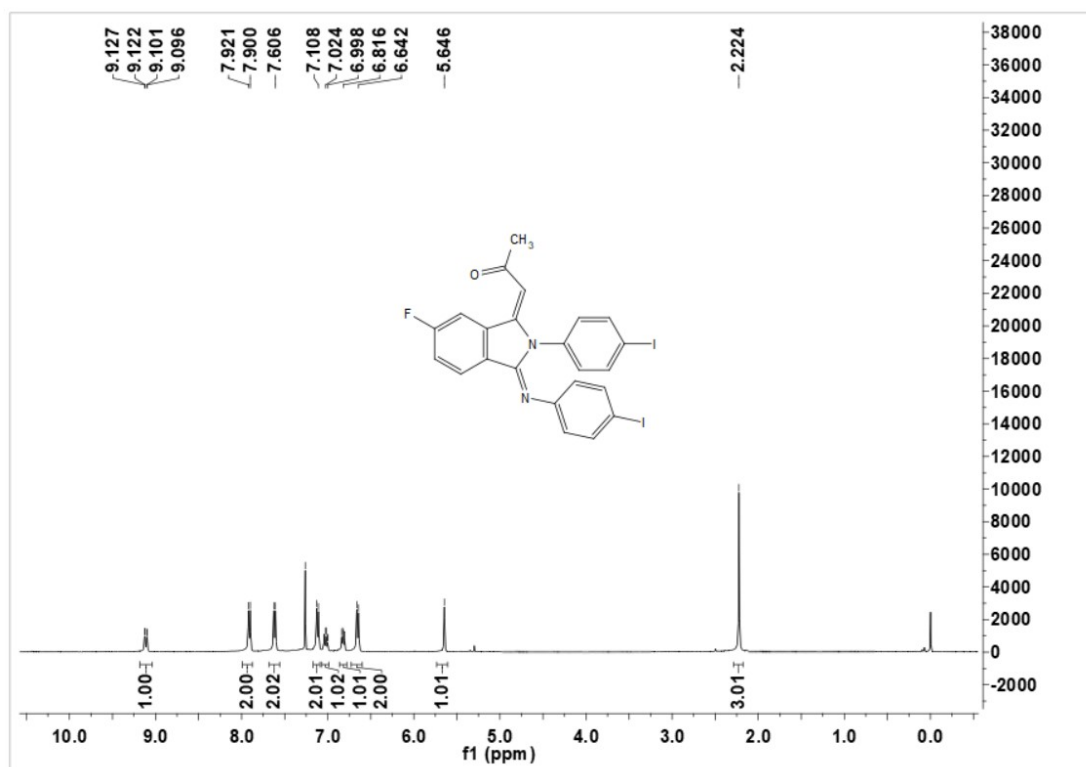

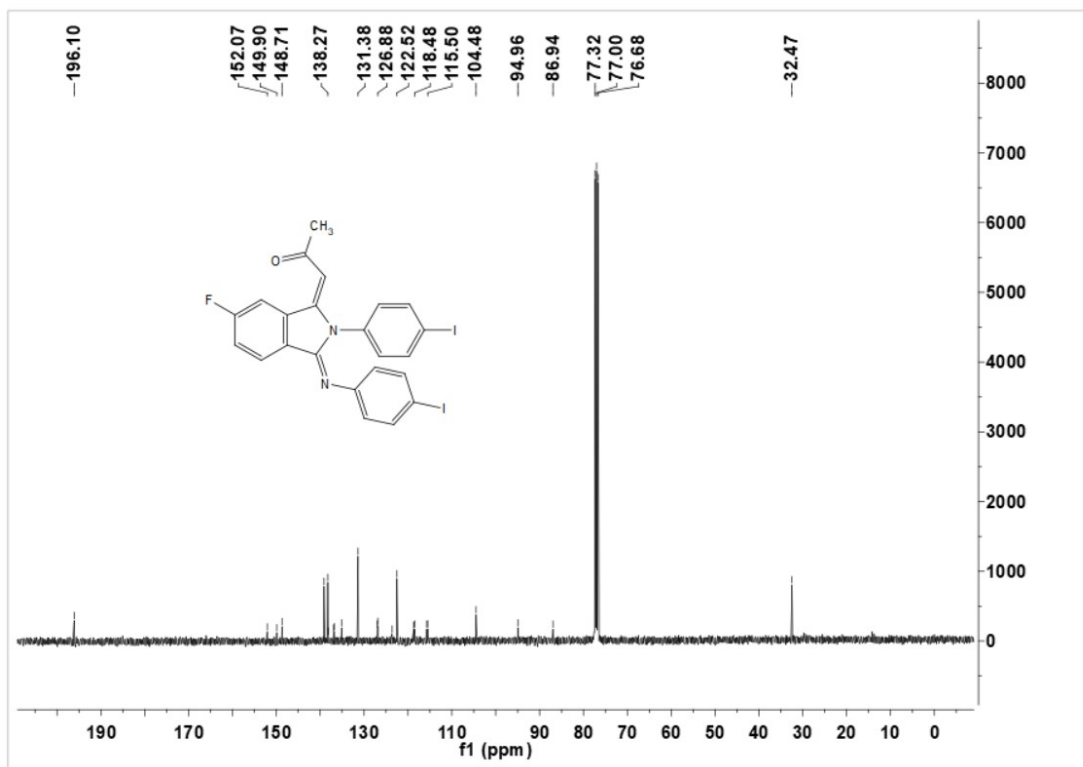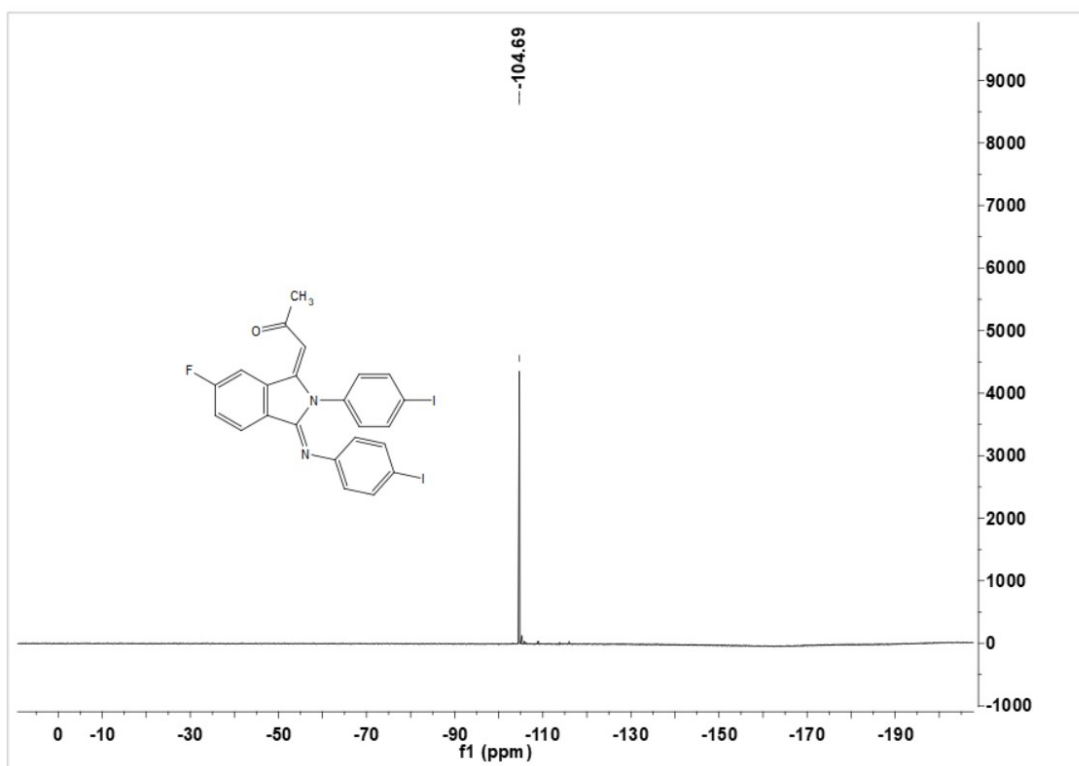

1-((1*E*, 3*Z*)-2-(4-Chlorophenyl)-3-((4-chlorophenyl)imino)-6-methyl-Isoindolin-1-ylidene)propan-2-one (8i)

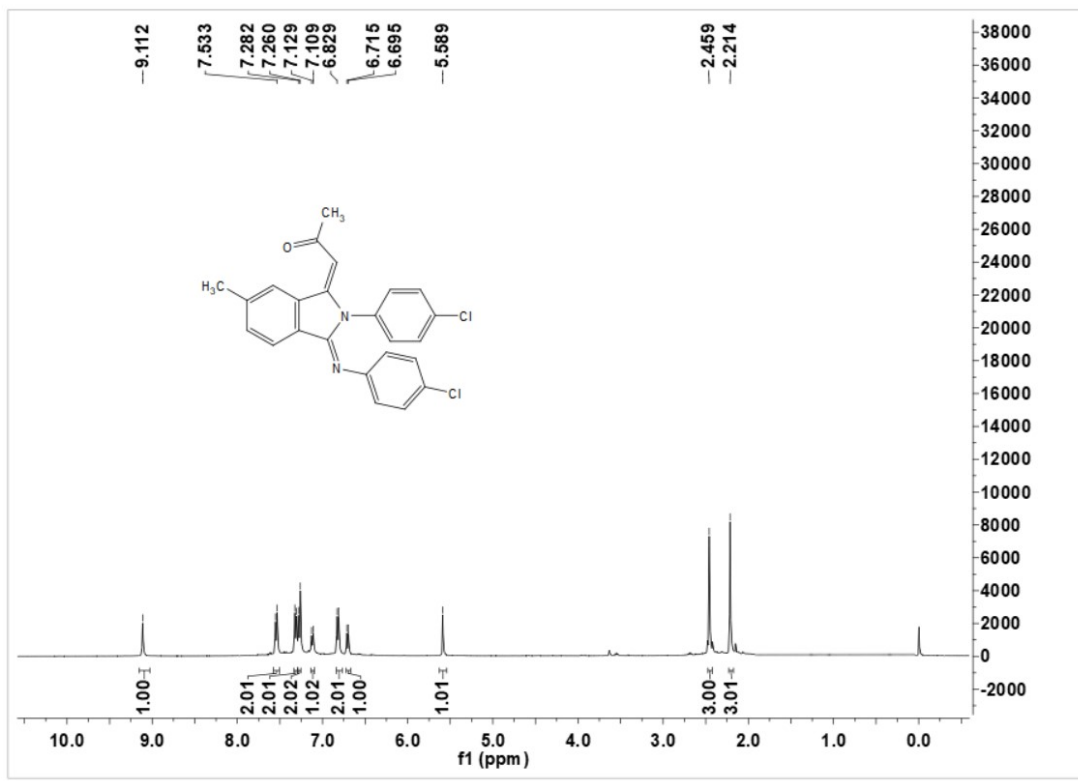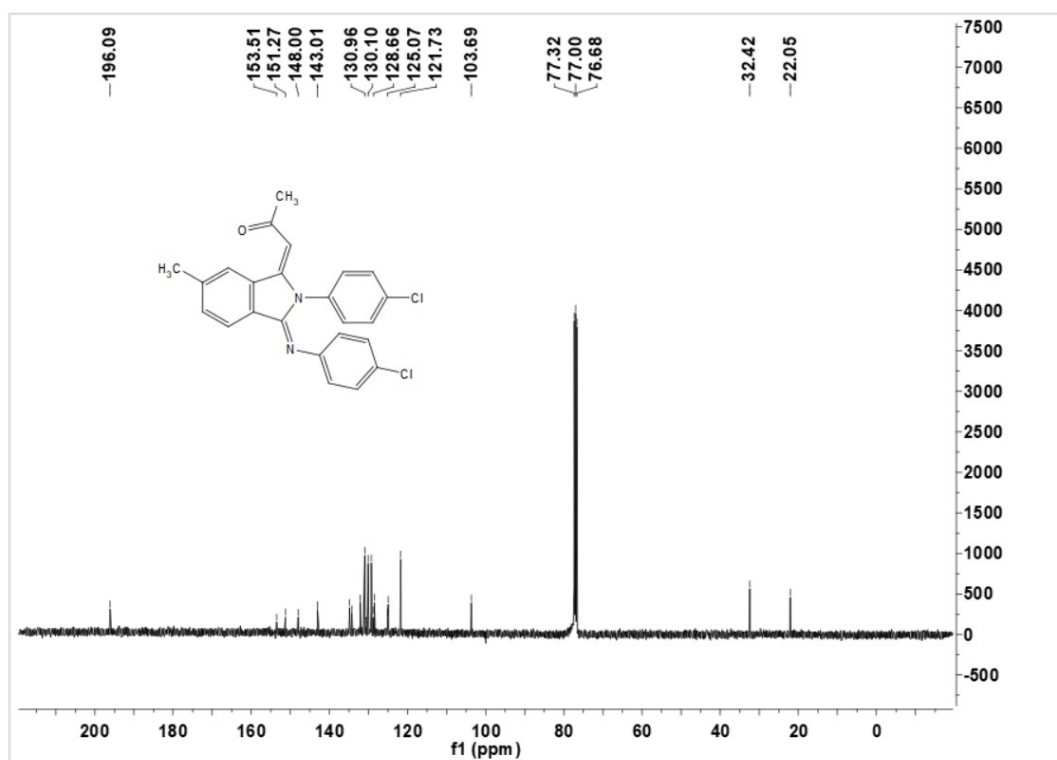

1-((1*E*,3*Z*)-2-(4-Iodophenyl)-3-((4-iodophenyl)imino)-6-methyl-isoindolin-1-ylidene)propan-2-one (8j)

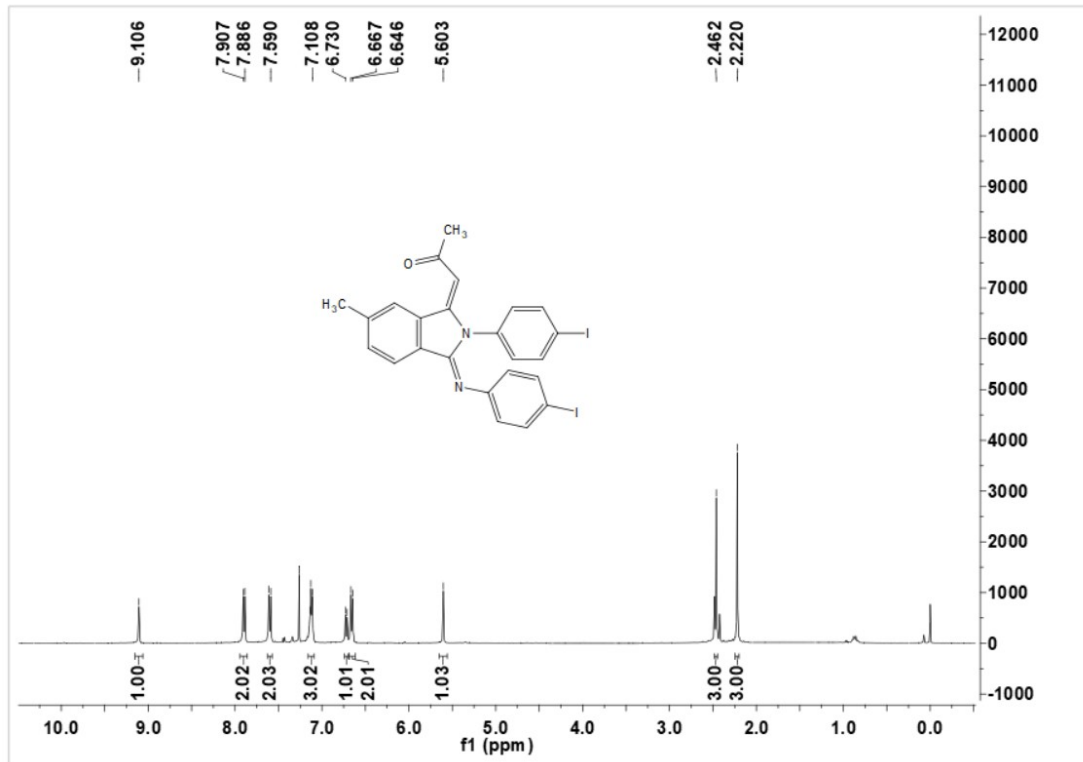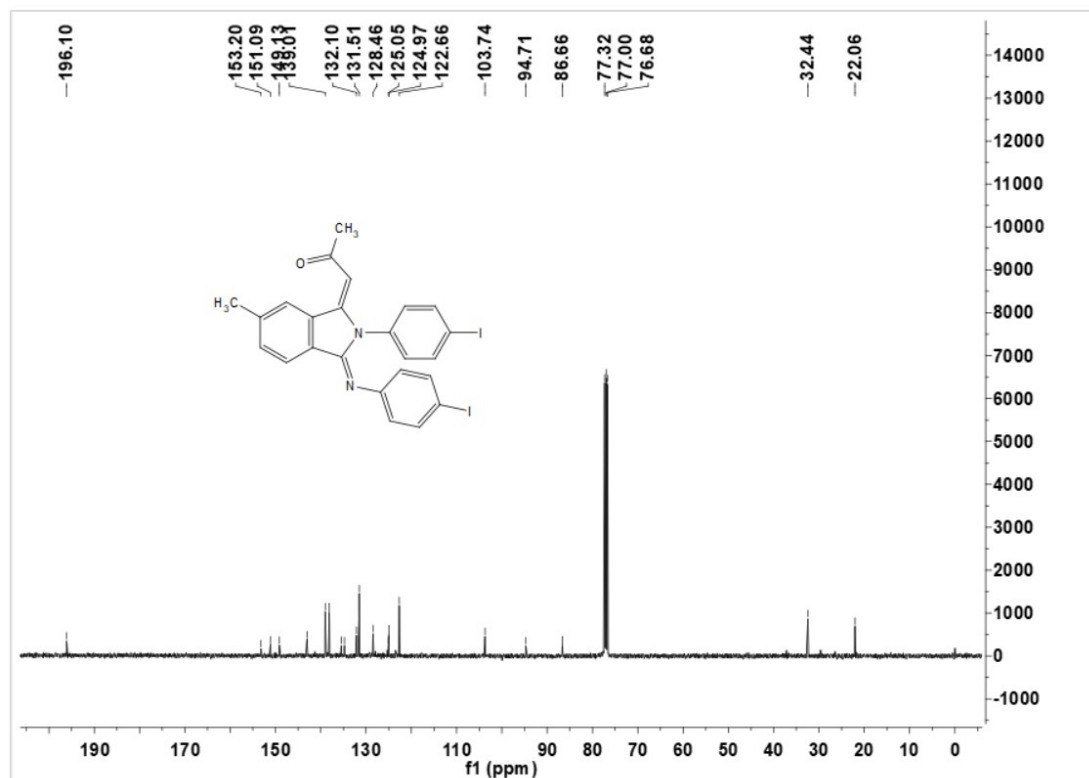



**Methyl-4-(((1Z,3E)-2-(4-(methoxycarbonyl)phenyl)-5-methyl-3-(2-oxopropylidene)isoindolin-1-ylidene)amino)benzoate (8k)**

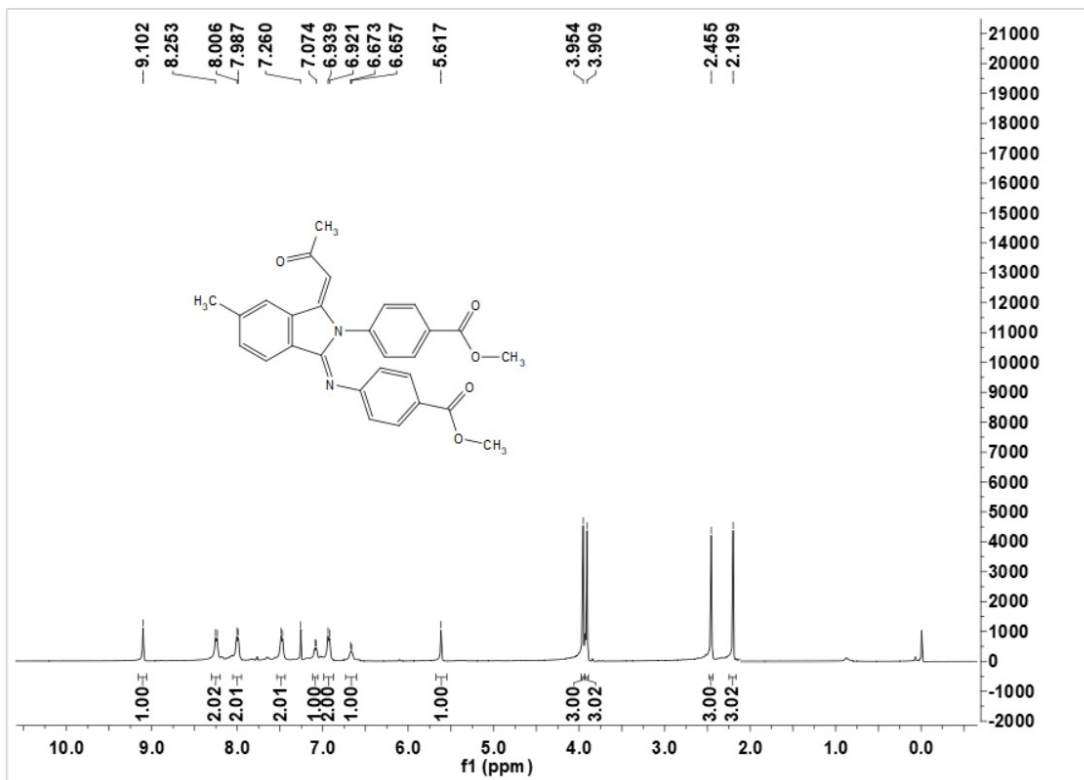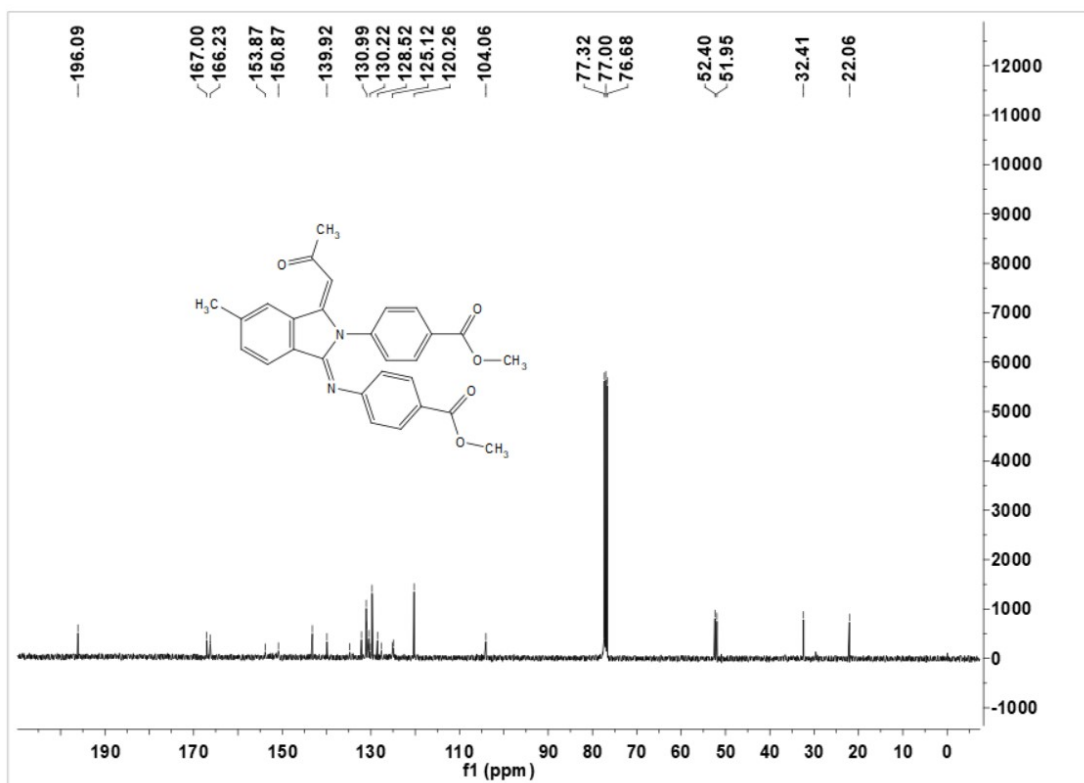

**(1*E*, 3*Z*)-2-(4-Bromophenyl)-3-((4-bromophenyl)imino)-1-(2-oxopropylidene)isoindoline-5-carbonitrile (8I)**

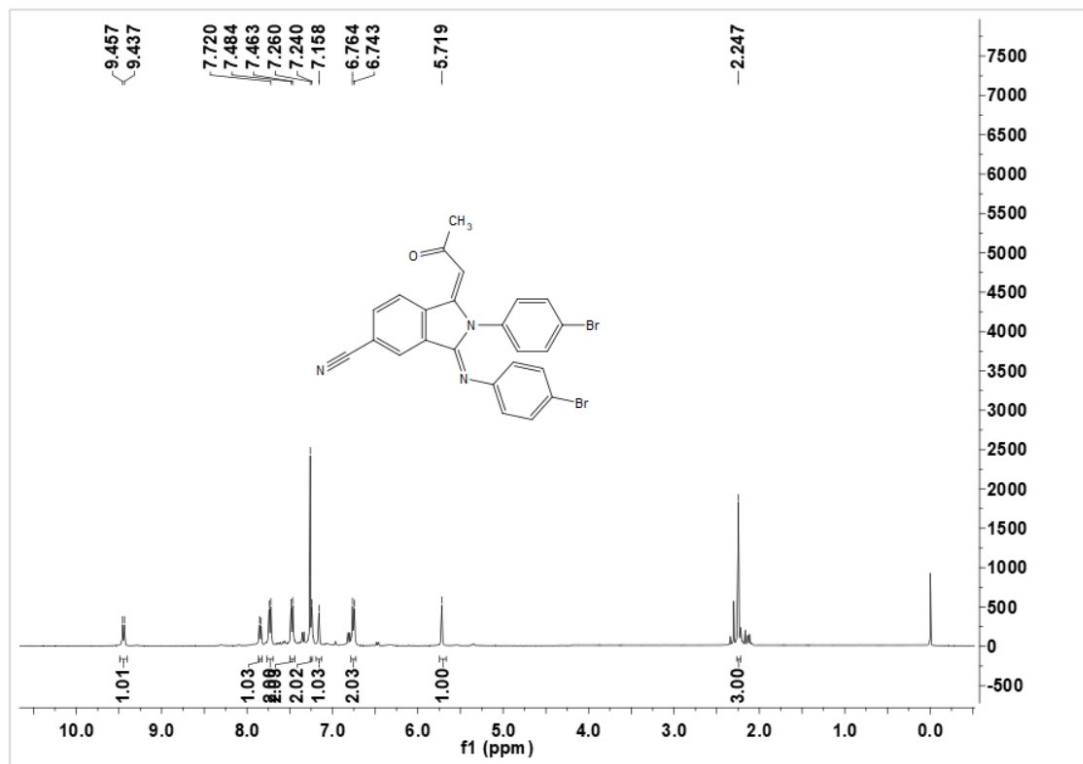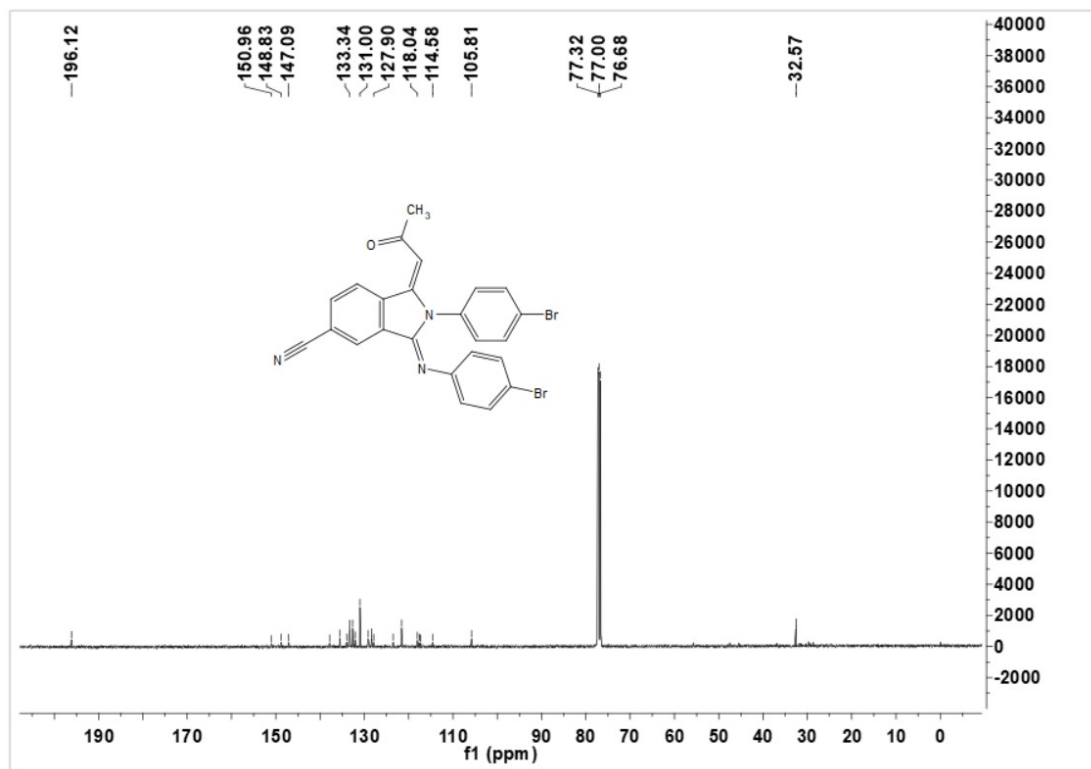

1-((1*E*,3*Z*)-2-(4-Bromophenyl)-3-((4-bromophenyl)imino)-6-(methylsulfonyl)isoindolin-1-ylidene)propan-2-one (8m)

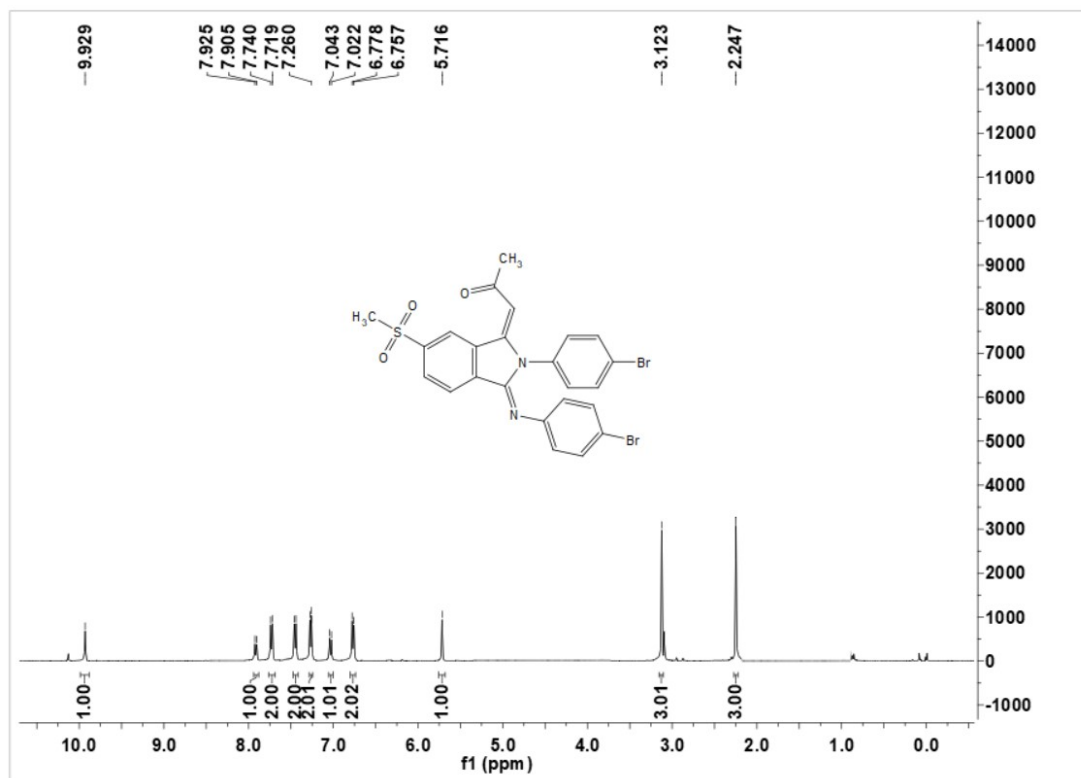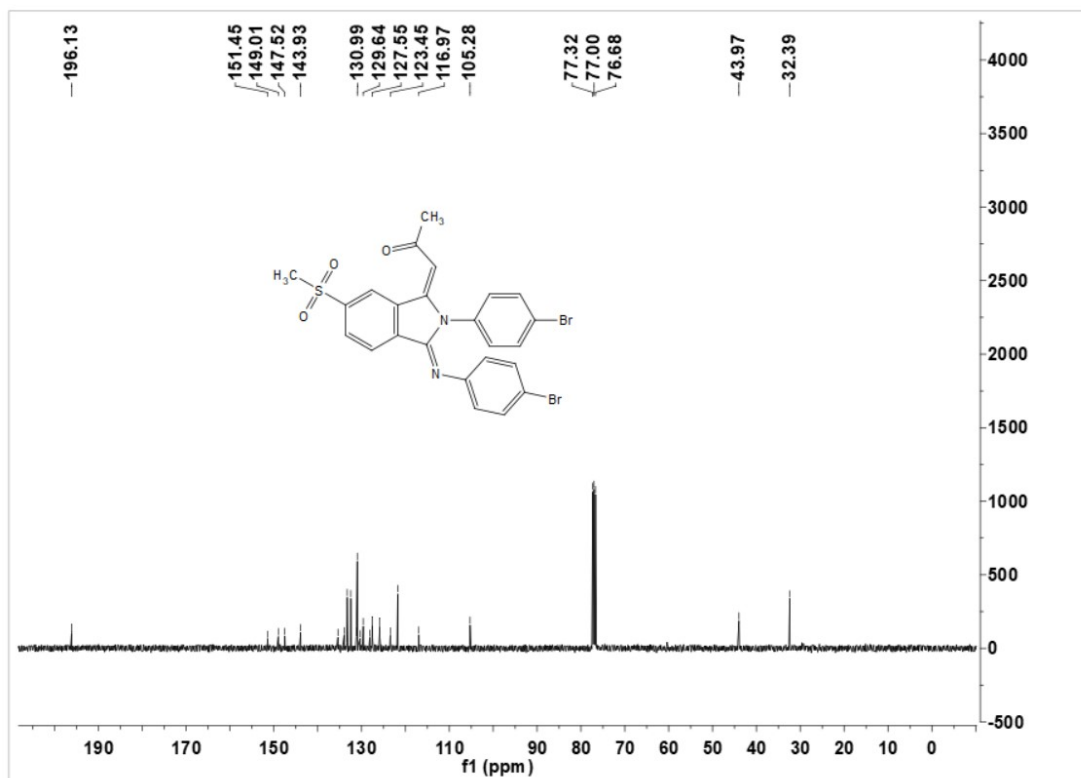

**(E)-1-((Z)-2-Phenyl-1-(phenylimino)-1,9-dihydroindeno[1,2-f]isoindol-3(2H)-ylidene)propan-2-one (8n)**

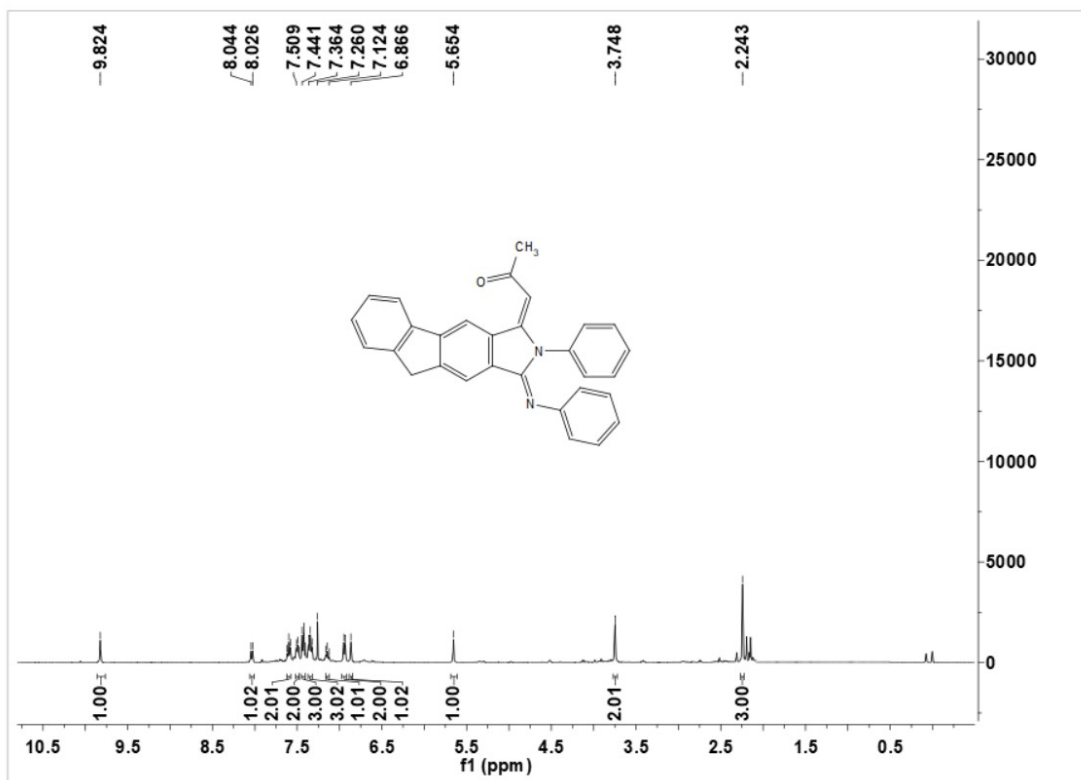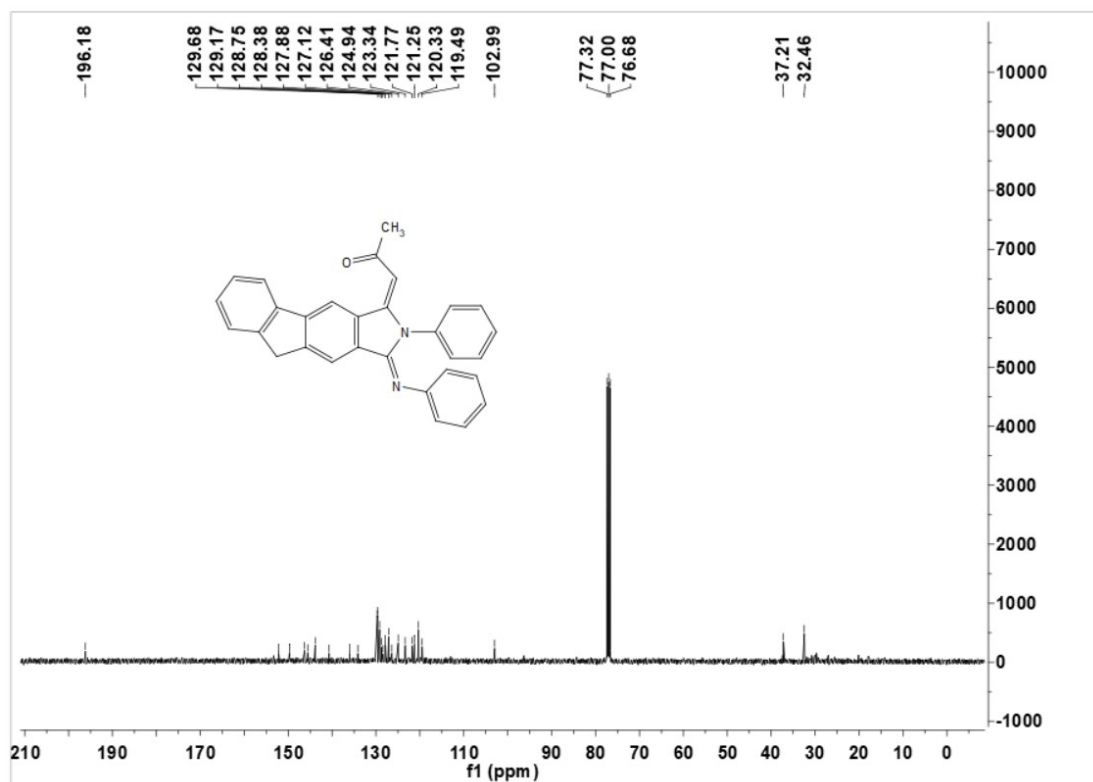

1-((1*E*,3*Z*)-6-Bromo-2-(4-methoxyphenyl)-3-((4-methoxyphenyl)imino)isoindolin-1-ylidene)propan-2-one (8o)

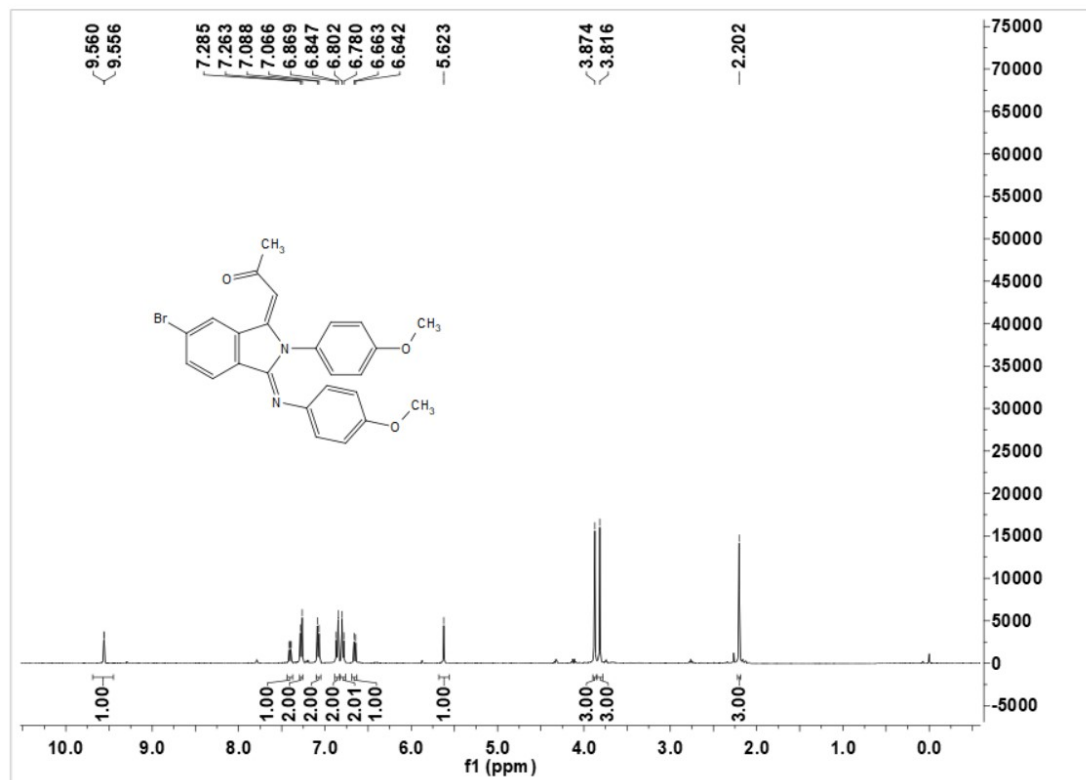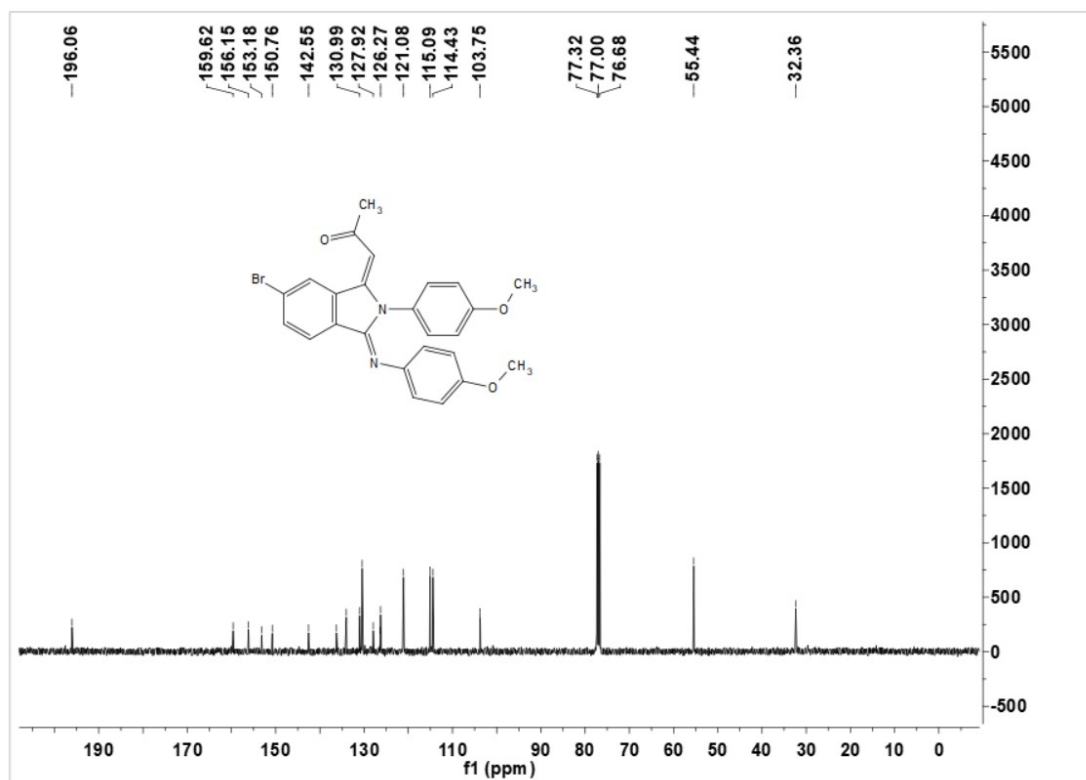

1-((1E,3Z)-4,6-Dichloro-2-(4-iodophenyl)-3-((4-iodophenyl)imino)isoindolin-1-ylidene)propan-2-one (8p)

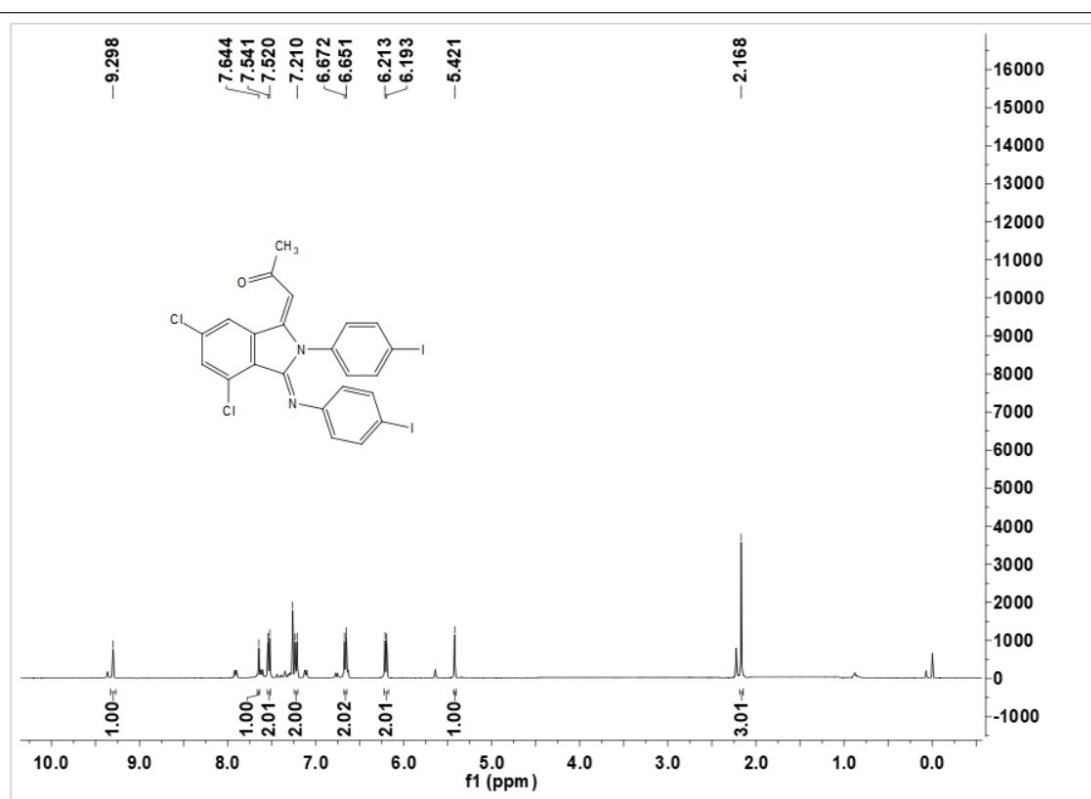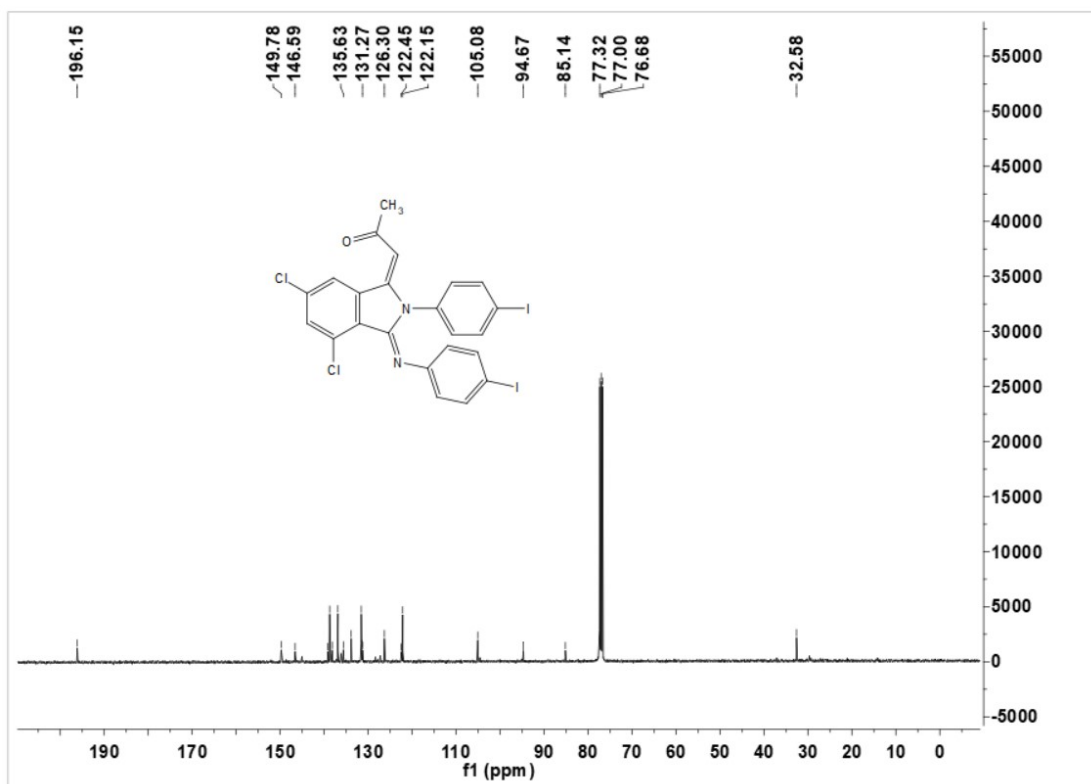

1-((1*E*,3*Z*)-4,6-Dichloro-2-(4-methoxyphenyl)-3-((4-methoxyphenyl)imino)isoindolin-1-ylidene)propan-2-one (8q)

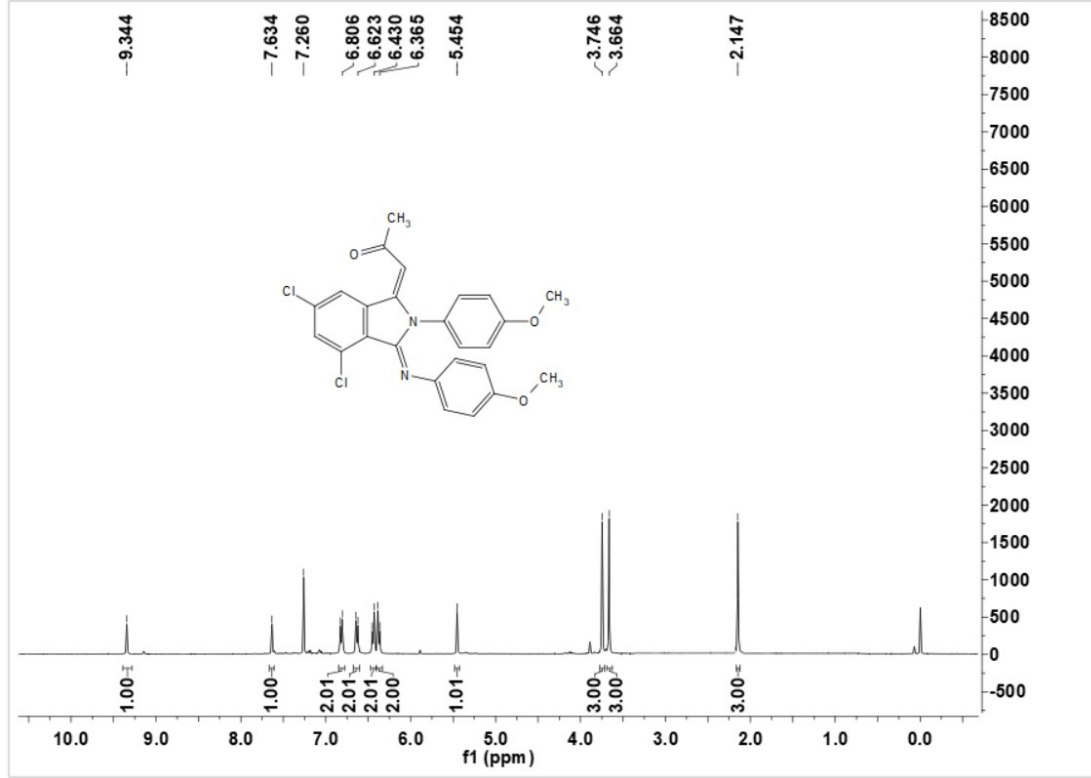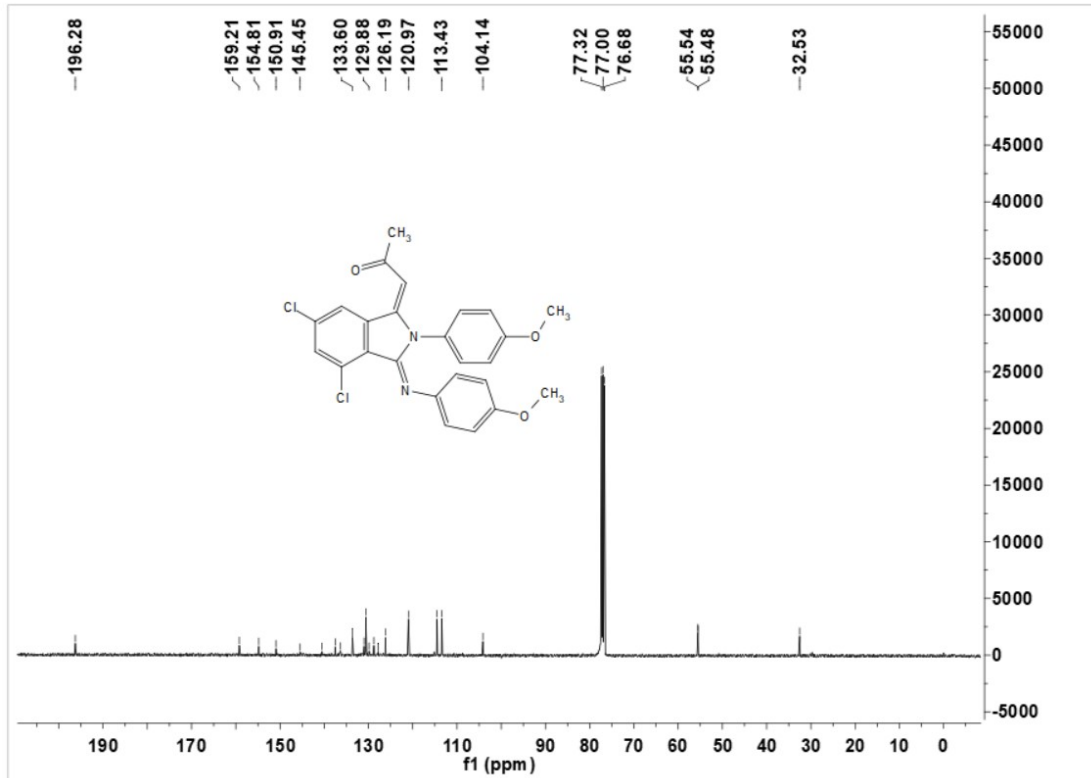

**(3Z)-2-(4-Methoxyphenyl)-1-((4-methoxyphenyl)imino)-3-(2-oxopropylidene)isoindolin-5-yl 4-methylbenzenesulfonate (8r)**

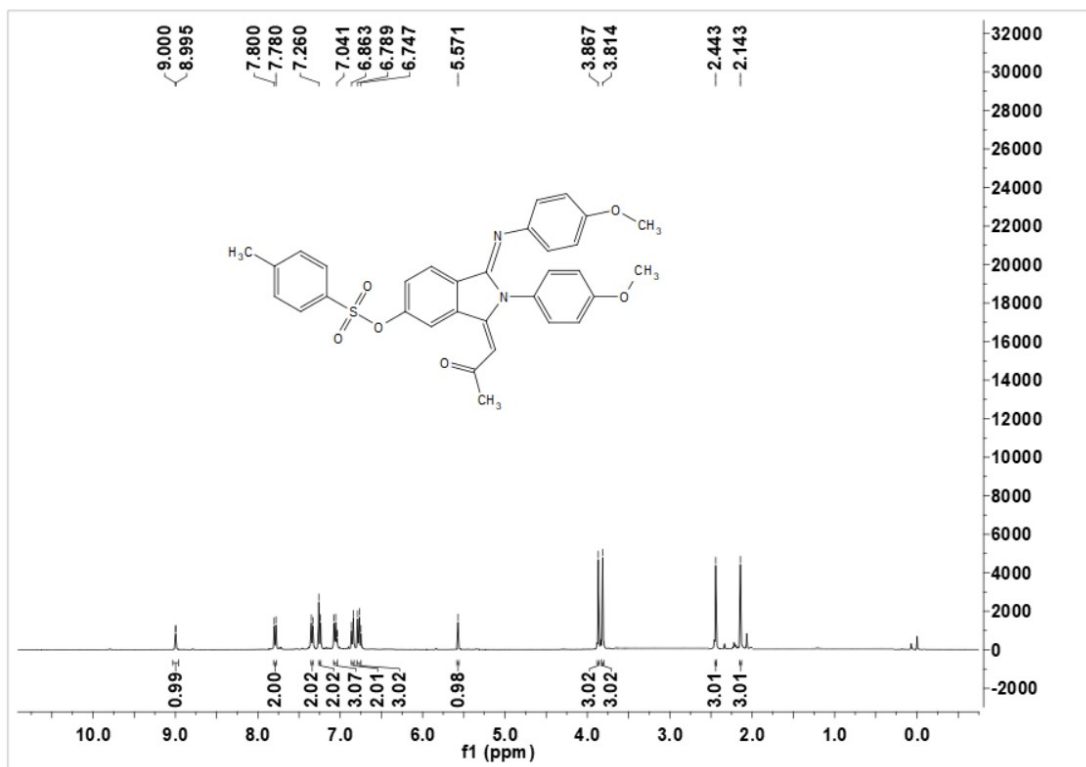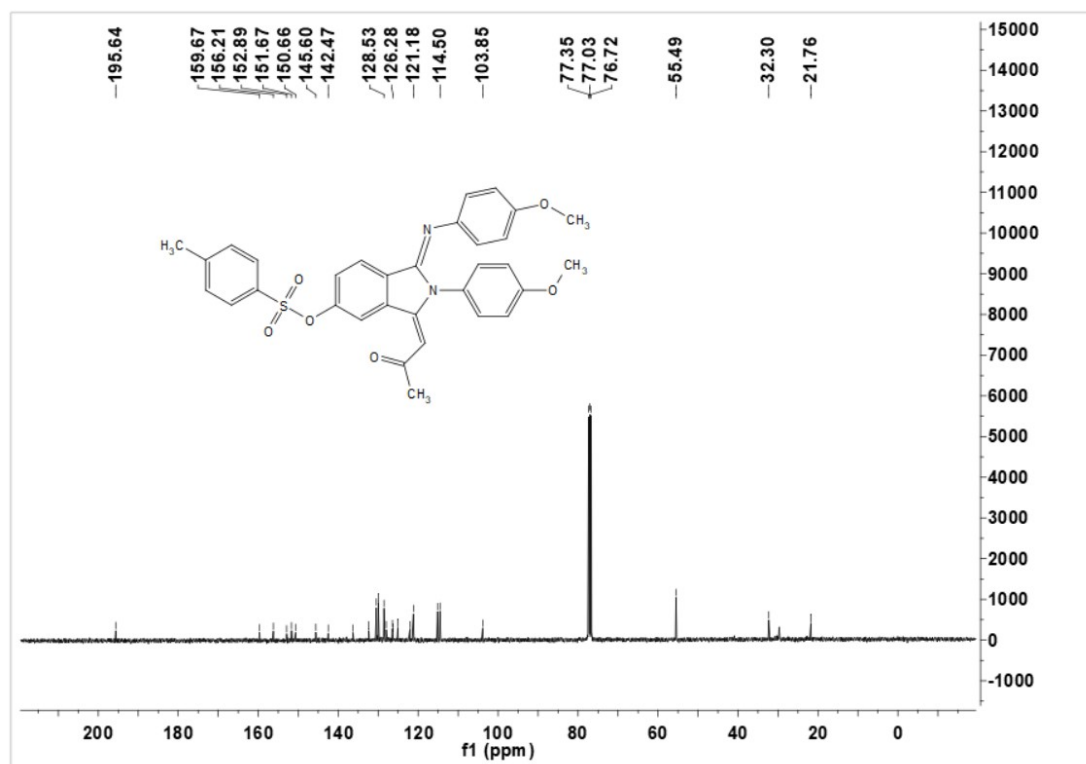



1-((1*E*, 3*Z*)-2-Benzyl-3-(benzylimino)isoindolin-1-ylidene)propan-2-one (8s)

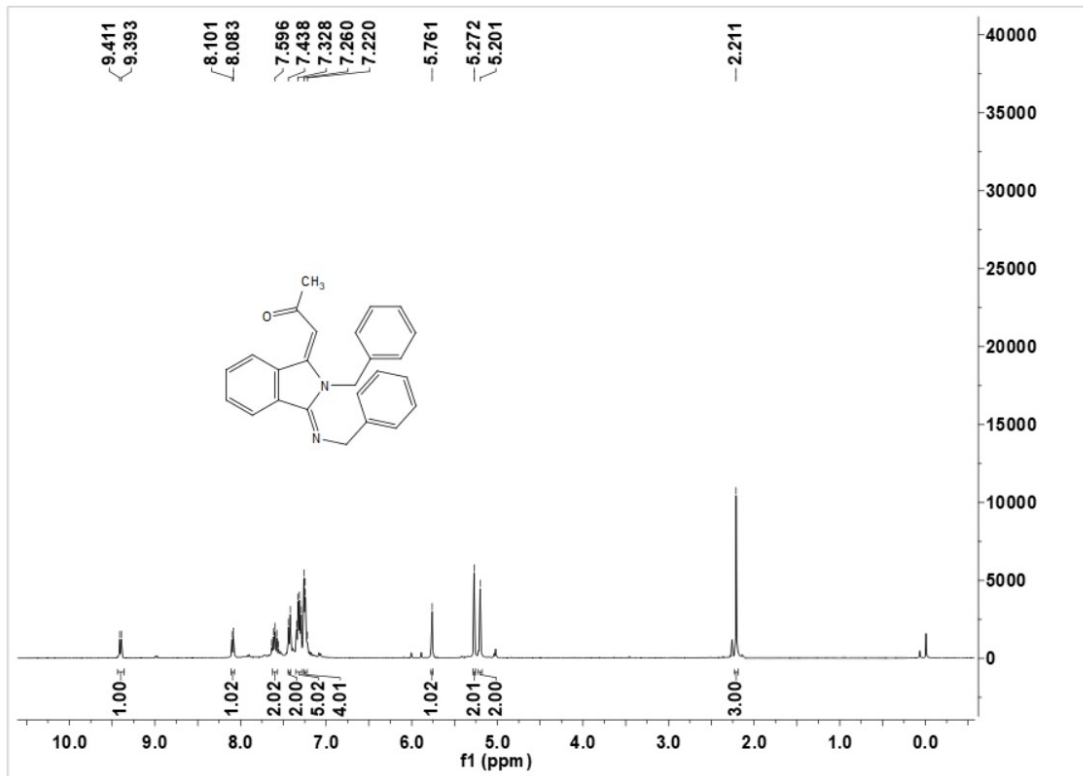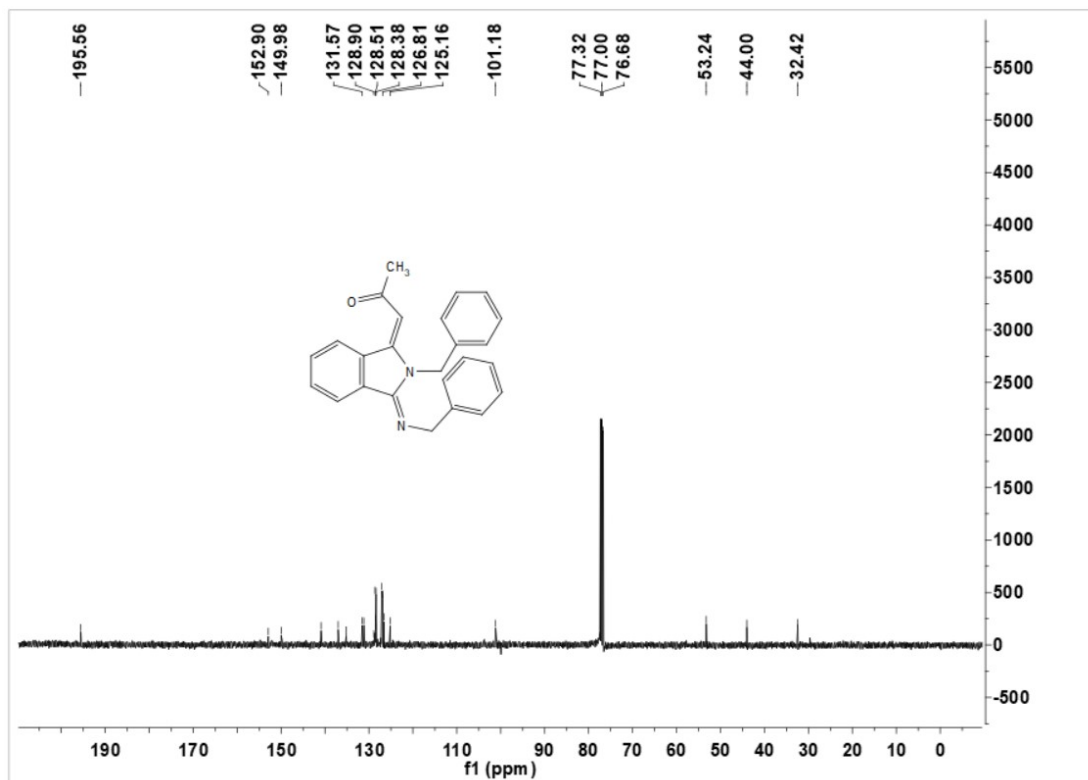

1-((1*E*,3*Z*)-2-(4-Fluorobenzyl)-3-((4-fluorobenzyl)imino)-6-methyl-isoindolin-1-ylidene)propan-2-one (8t)

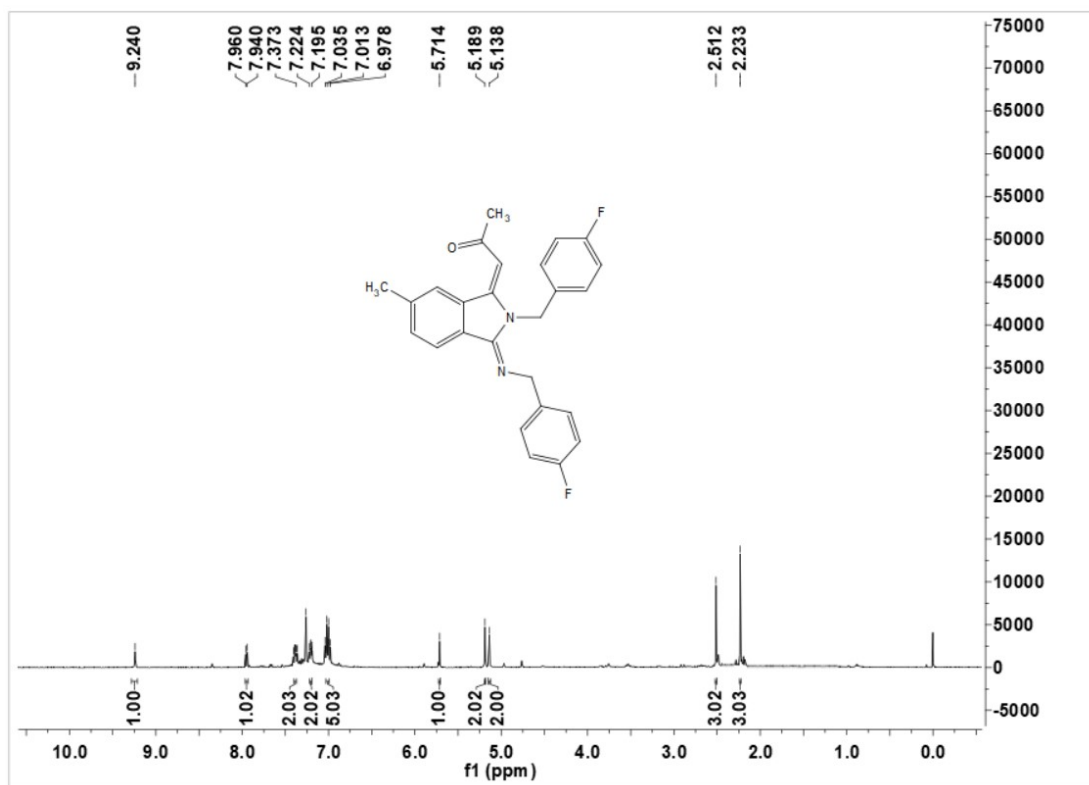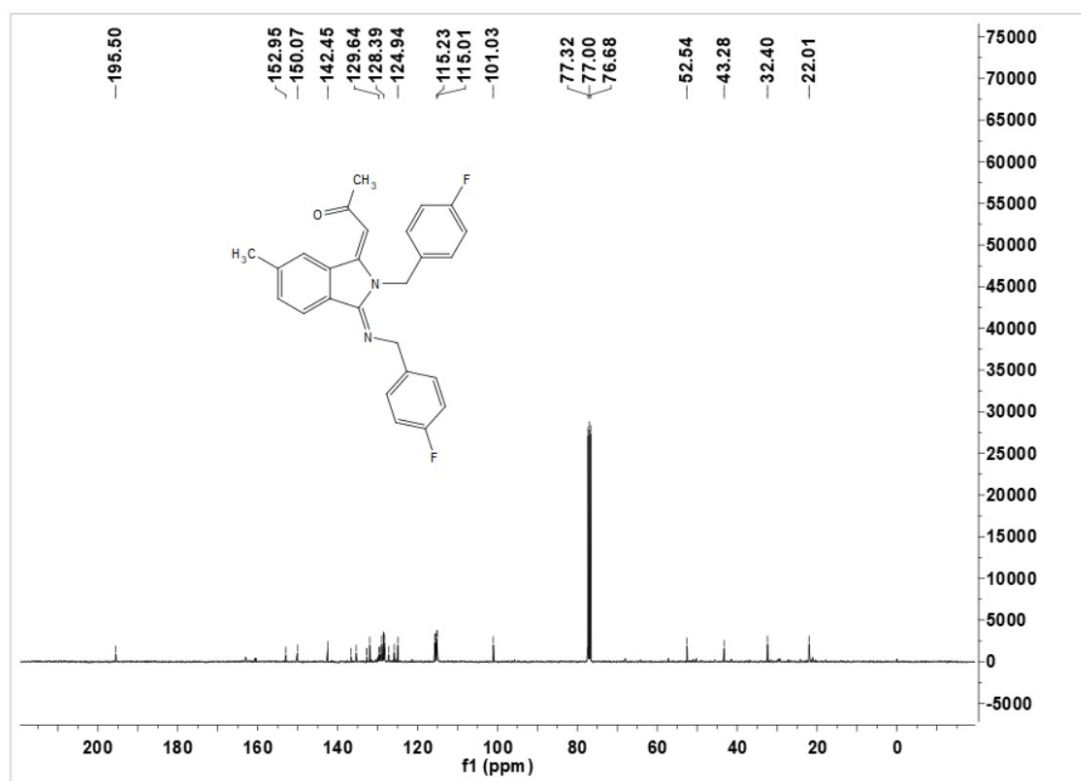

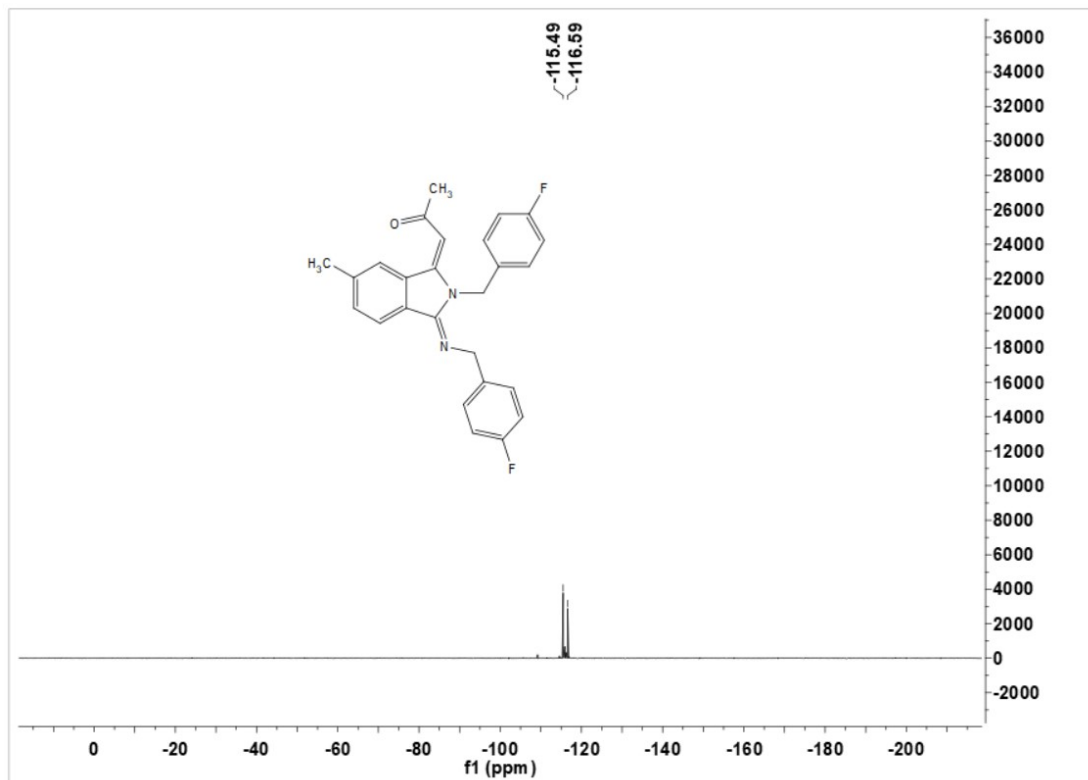

1-((1*E*,3*Z*)-2-(4-Chlorobenzyl)-3-((4-chlorobenzyl)imino)-6-methyl-isoindolin-1-ylidene)propan-2-one (8u)

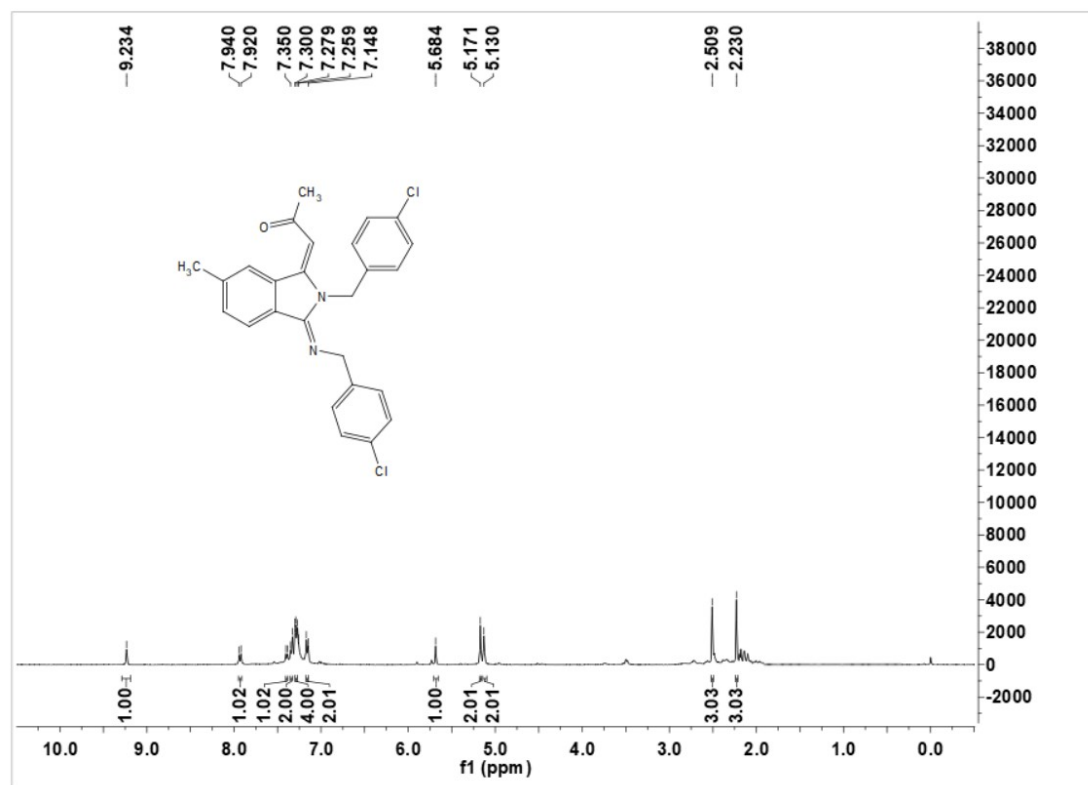

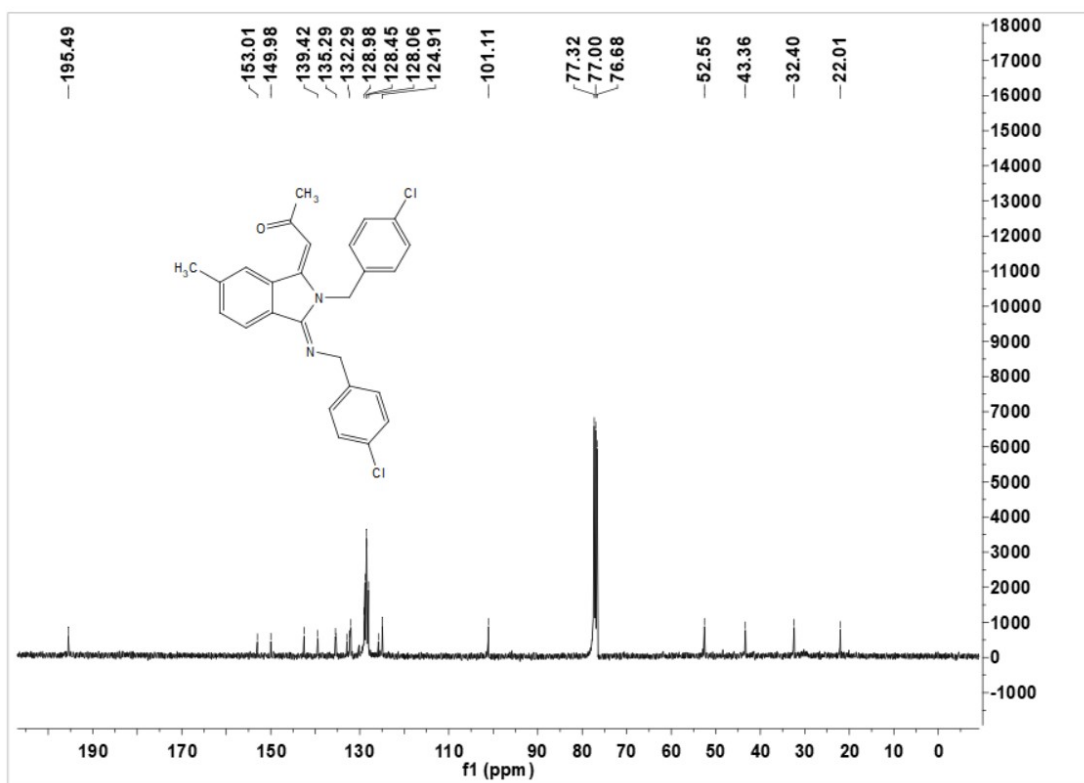

1-((1E,3Z)-2-(4-Methoxybenzyl)-3-((4-methoxybenzyl)imino)-6-methyl-isoindolin-1-ylidene)propan-2-one (8v)

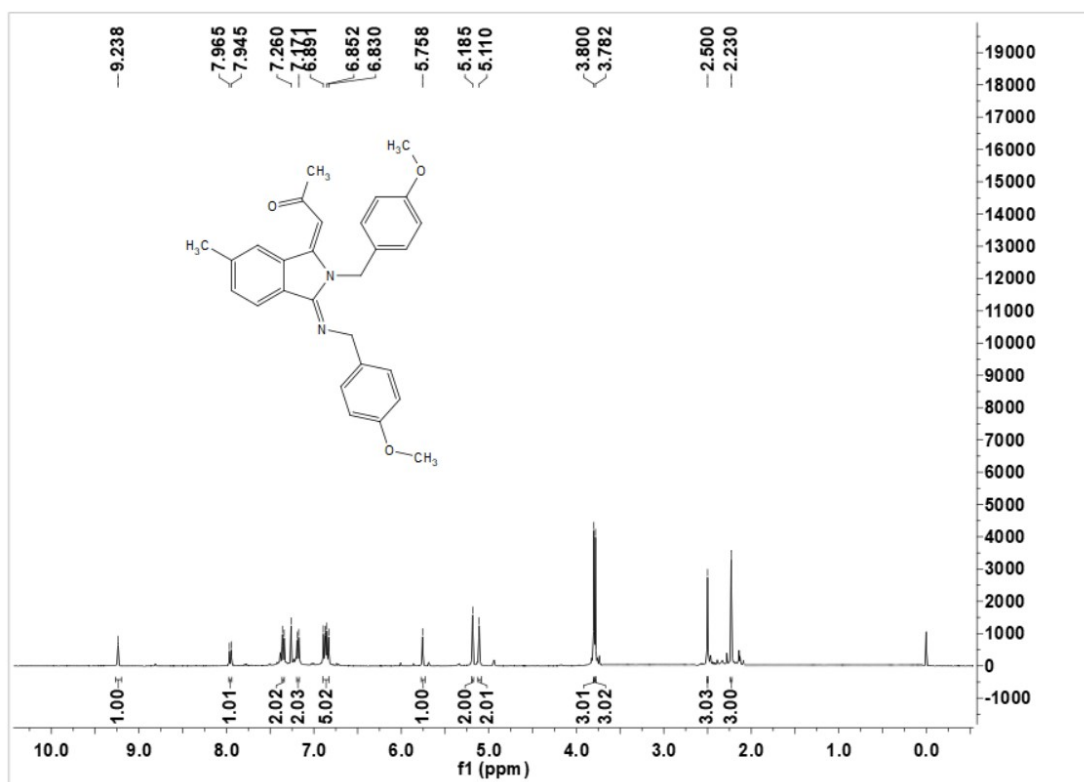

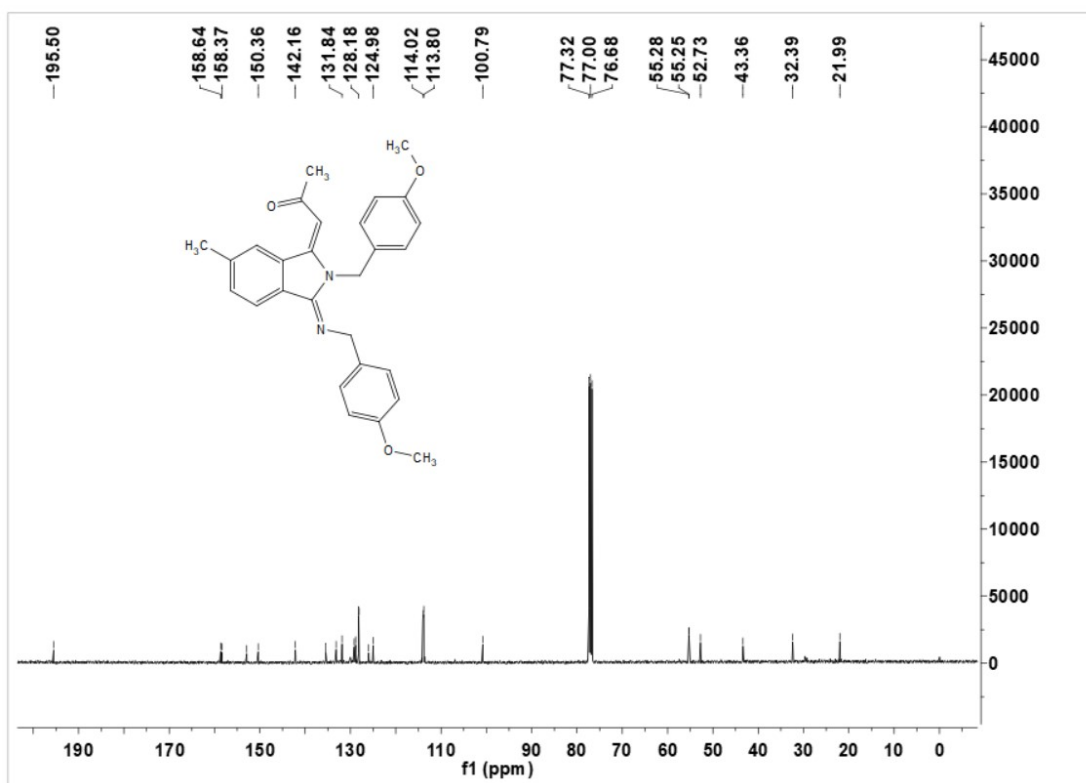

1-((1E,3Z)-2-(2-Chlorobenzyl)-3-((2-chlorobenzyl)imino)-6-methylisoindolin-1-ylidene)propan-2-one (8w)

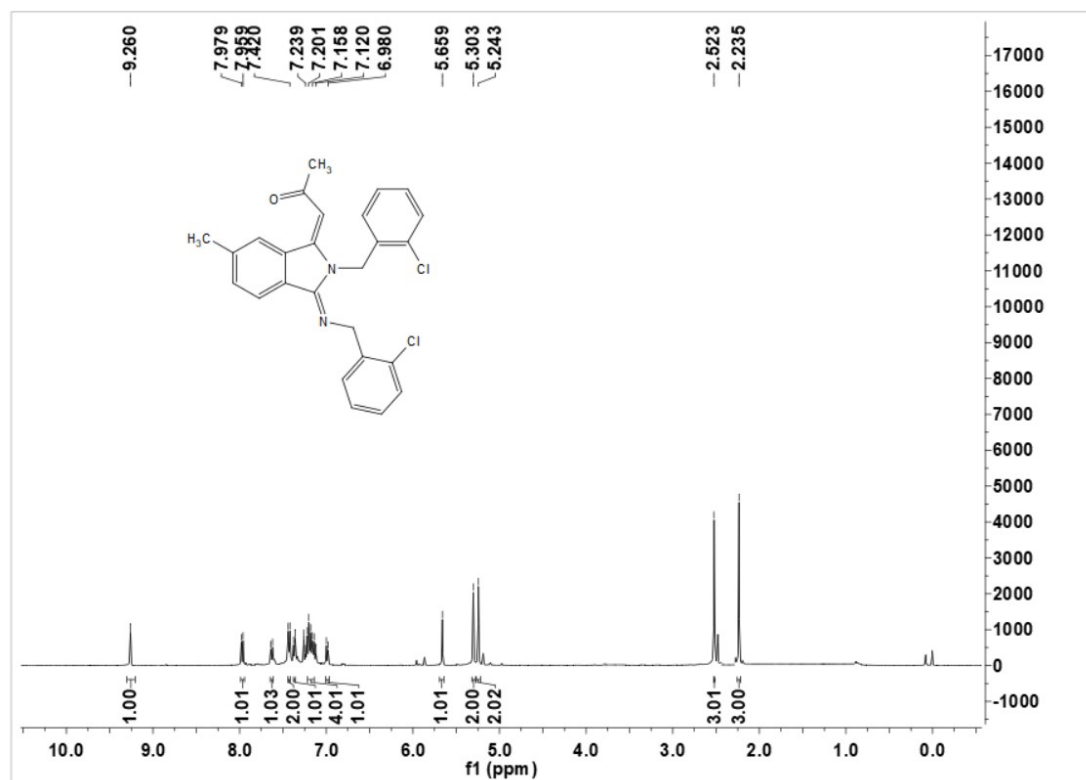

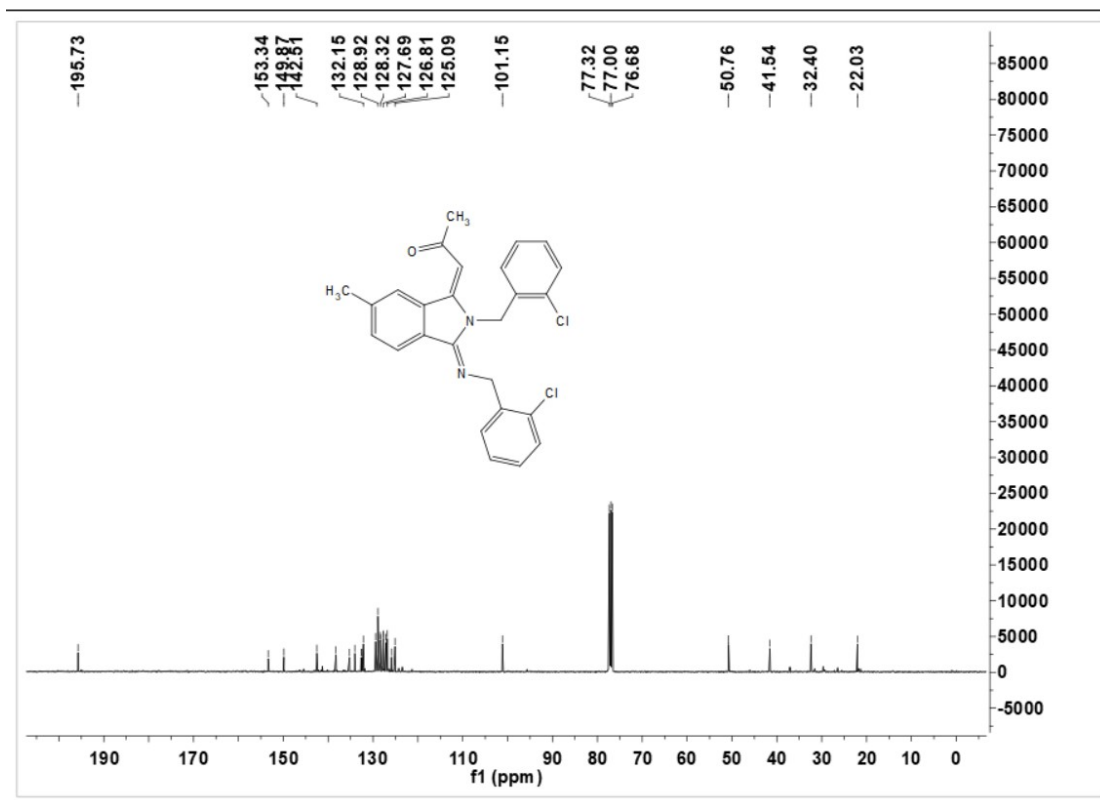

**1-((1E,3Z)-6-Fluoro-2-(4-methoxybenzyl)-3-((4-methoxybenzyl)imino)isoindolin-1-ylidene)propan-2-one (8x)**

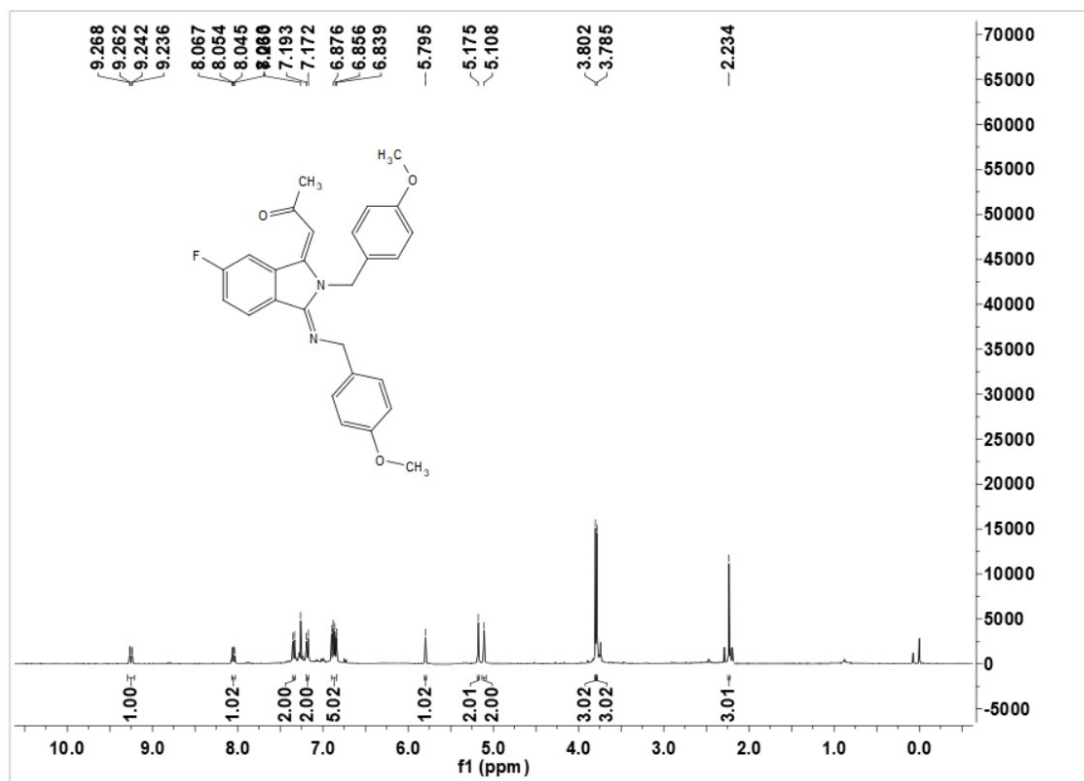

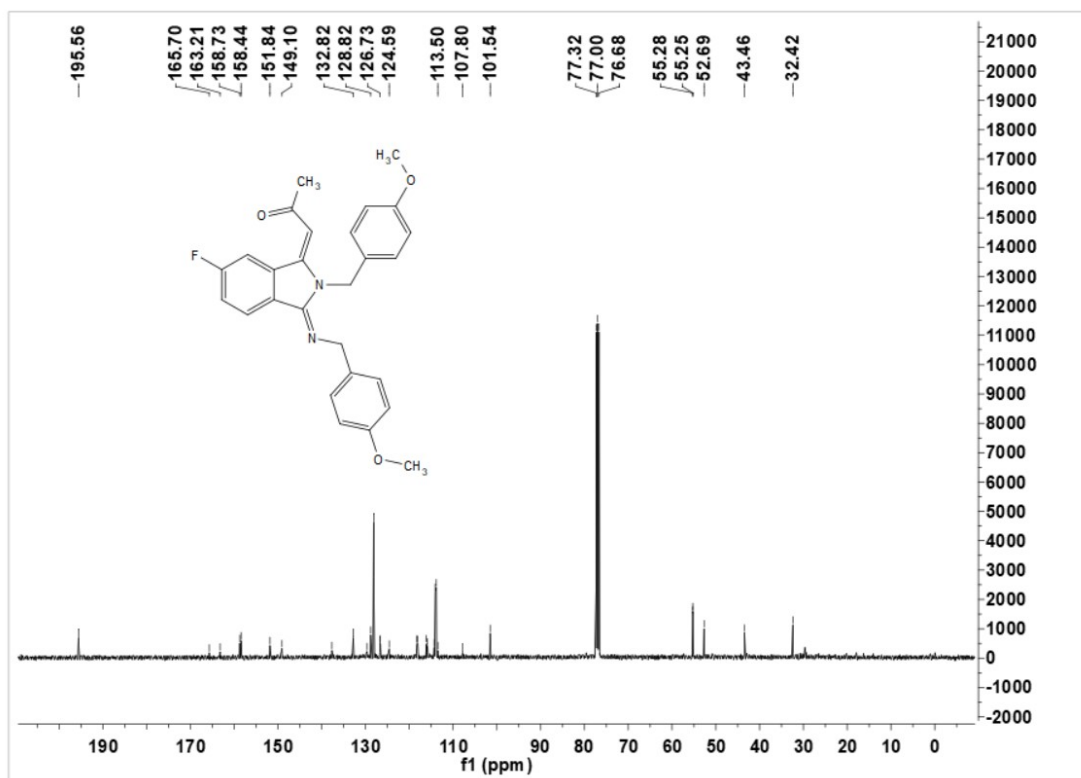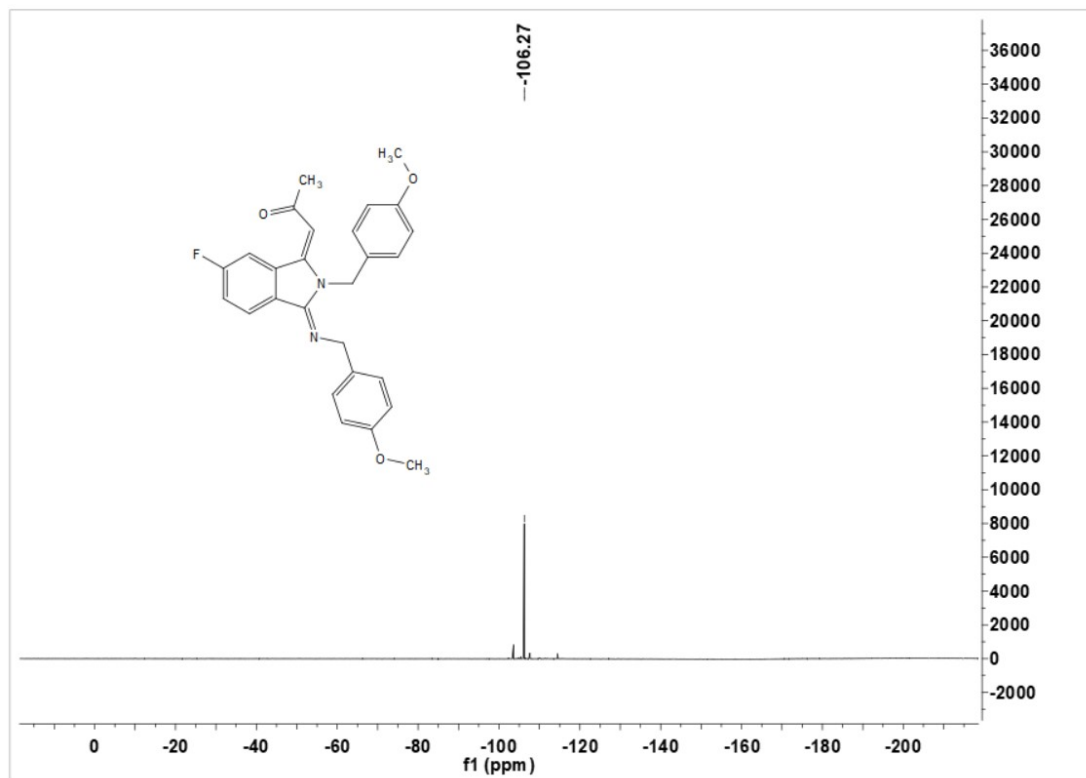

1-((1*E*,3*Z*)-6-Bromo-2-(2-chlorobenzyl)-3-((2-chlorobenzyl)imino)isoindolin-1-ylidene)propan-2-one (8y)

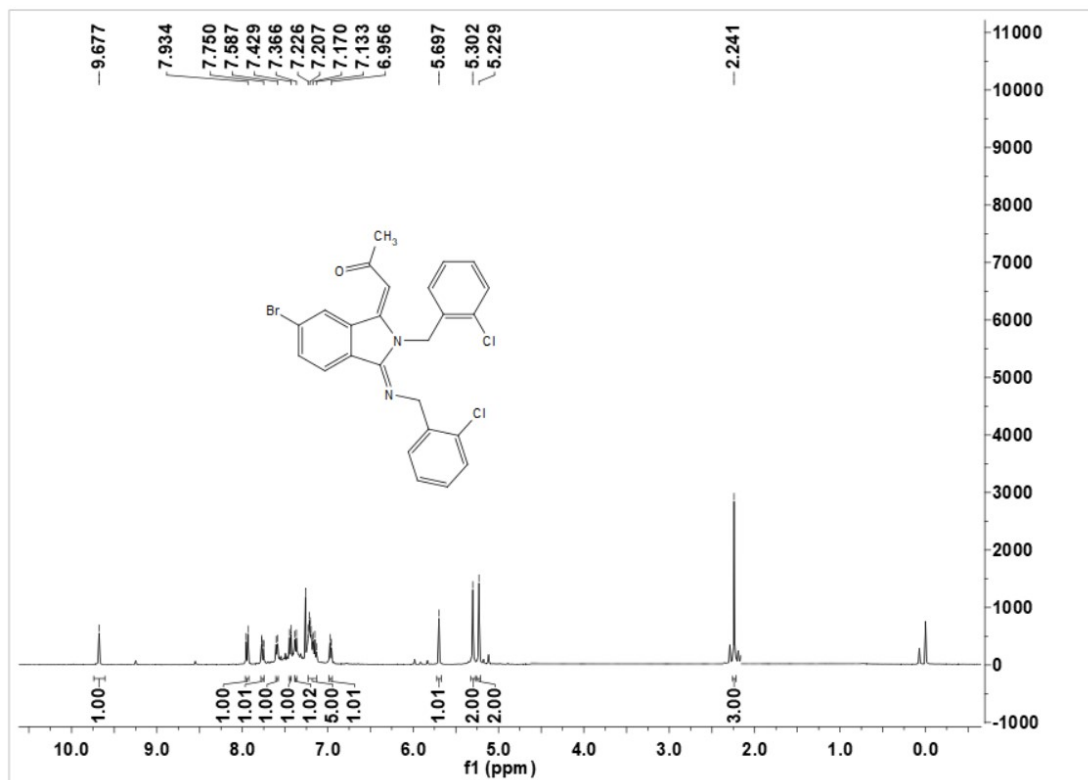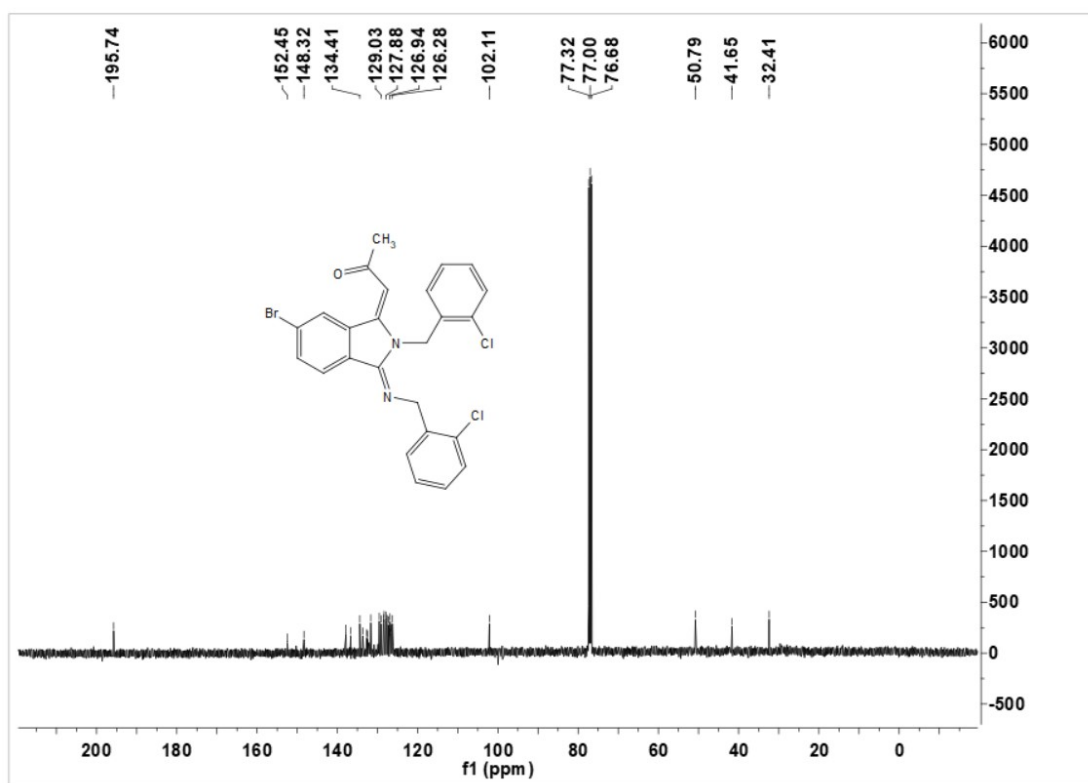



1-((1*E*, 3*Z*)-2-Phenethyl-3-(phenethylimino)isoindolin-1-ylidene)propan-2-one (8z)

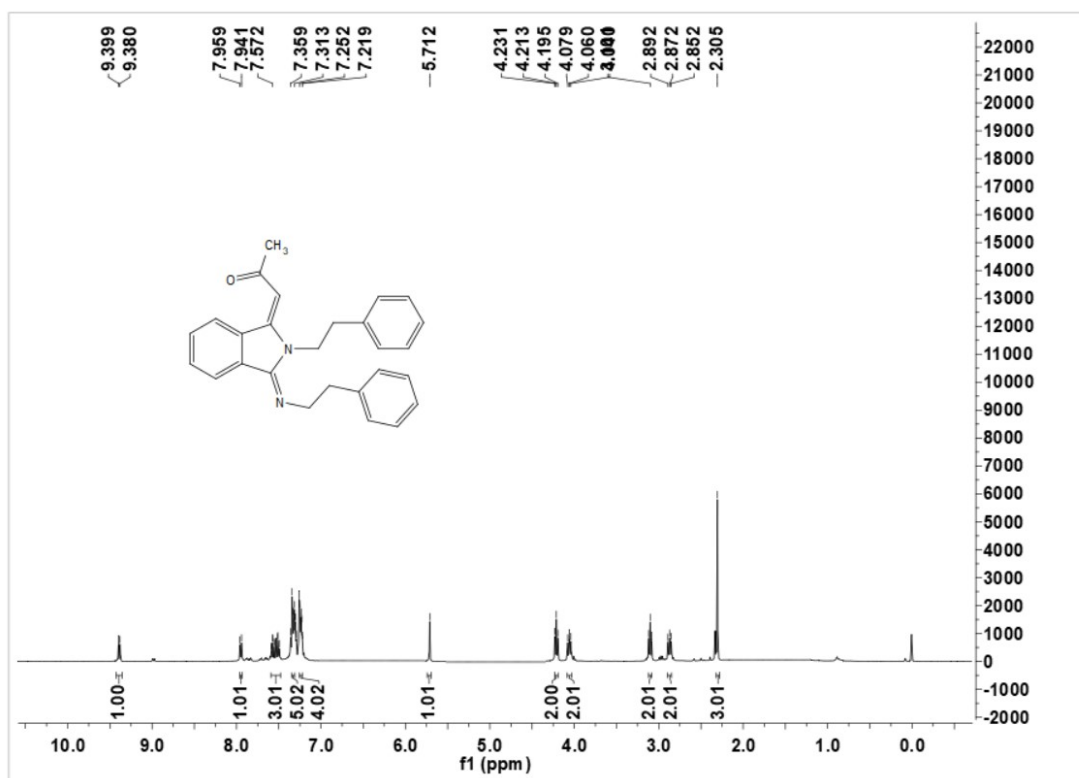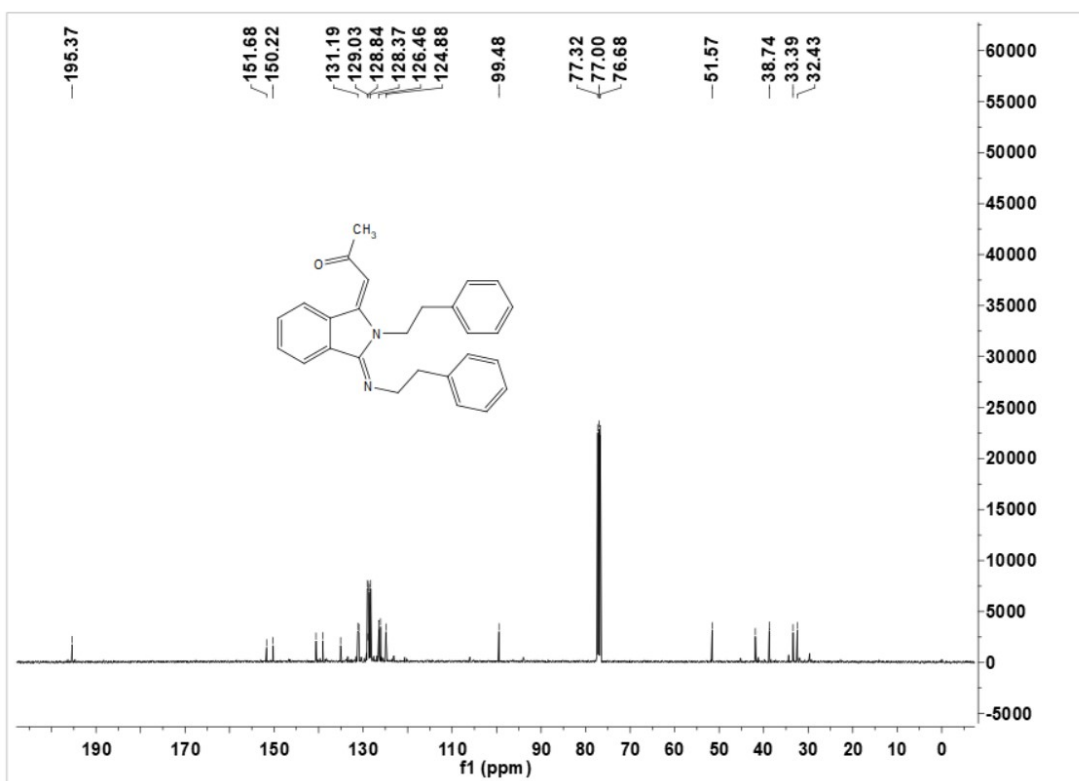

1-((1*E*, 3*Z*)-6-Methyl-2-phenethyl-3-(phenethylimino)isoindolin-1-ylidene)propan-2-one (8za)

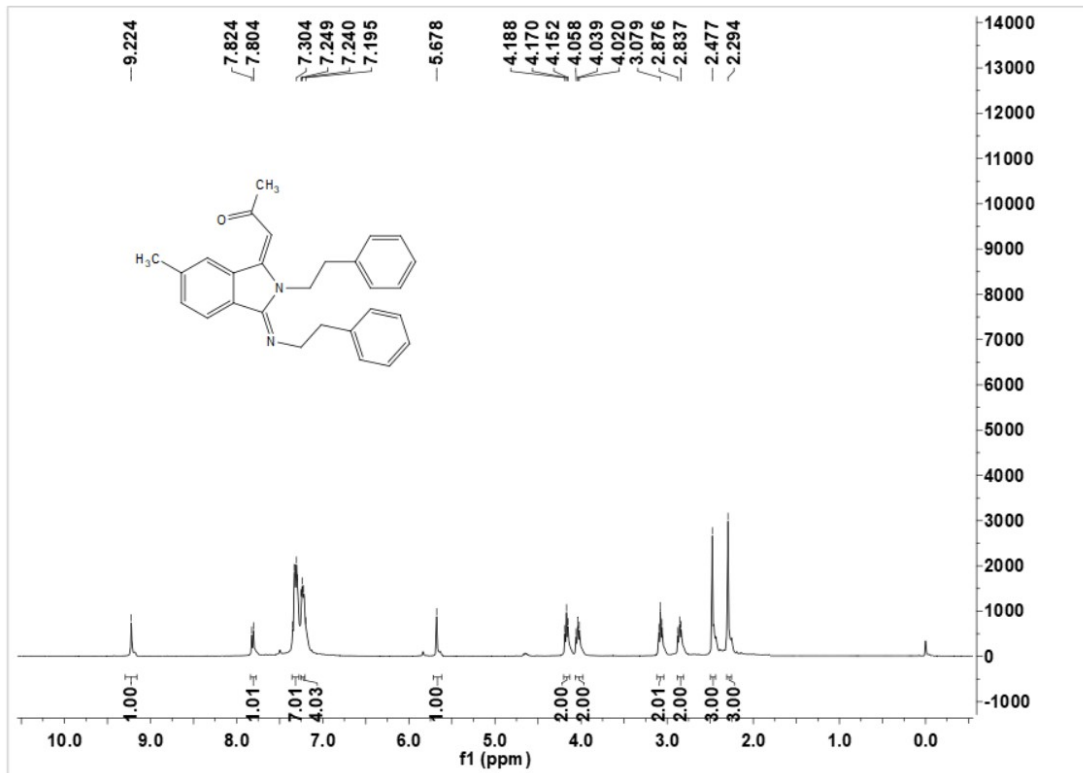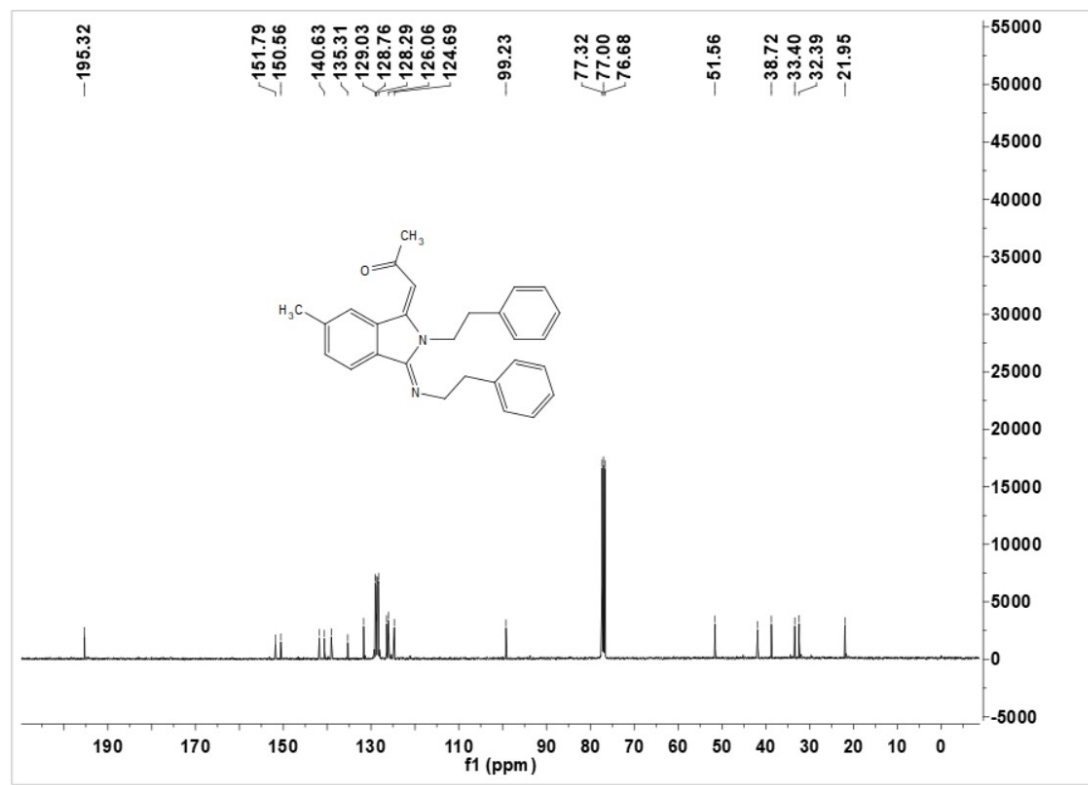

1-((1*E*, 3*Z*)-6-Fluoro-2-phenethyl-3-(phenethylimino)isoindolin-1-ylidene)propan-2-one (8zb)

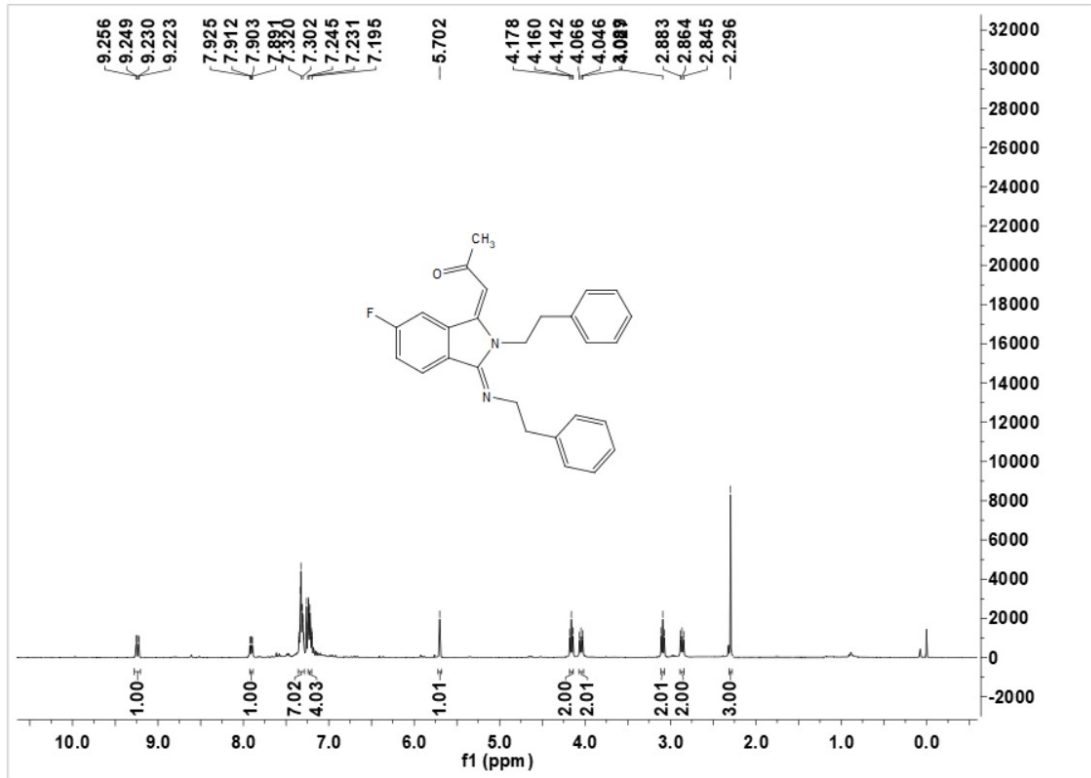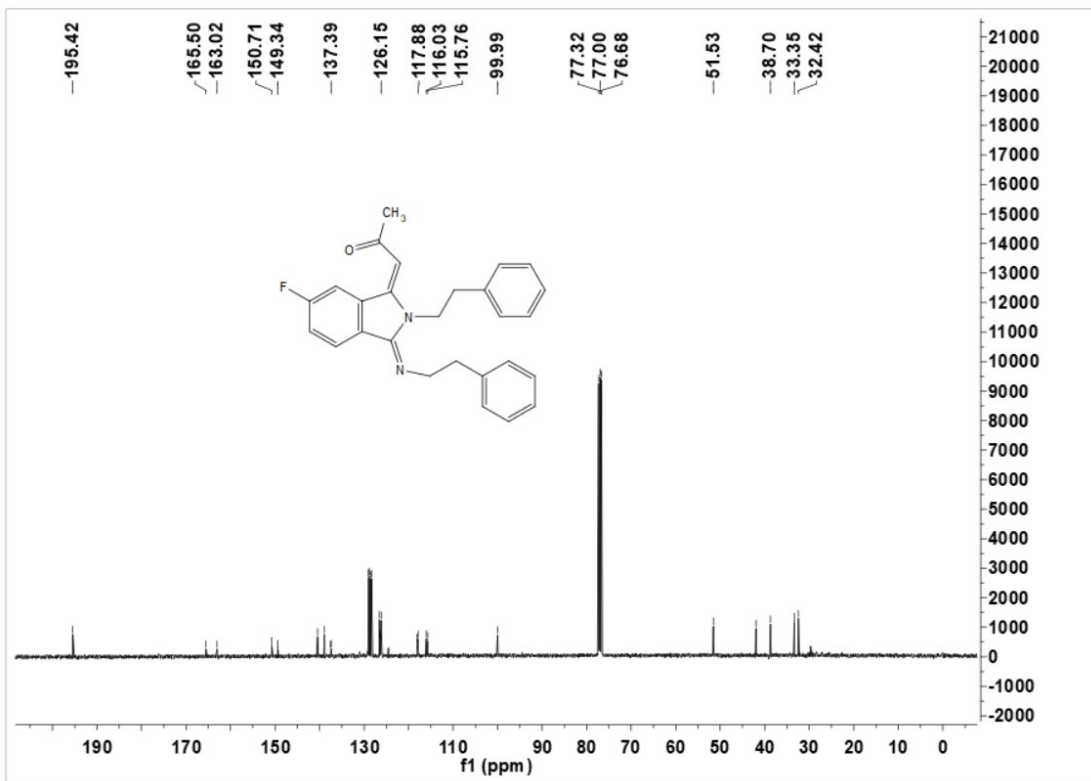

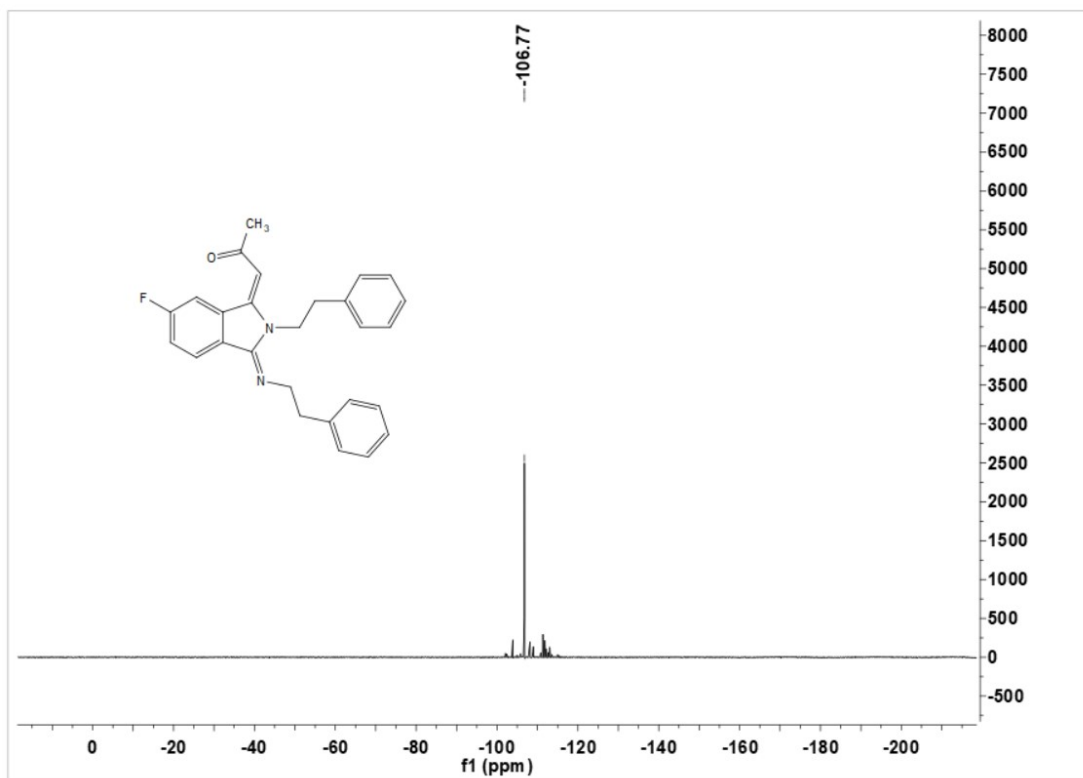

**1-((1E,3Z)-6-Bromo-2-phenethyl-3-(phenethylimino)isoindolin-1-ylidene)propan-2-one (8zc)**

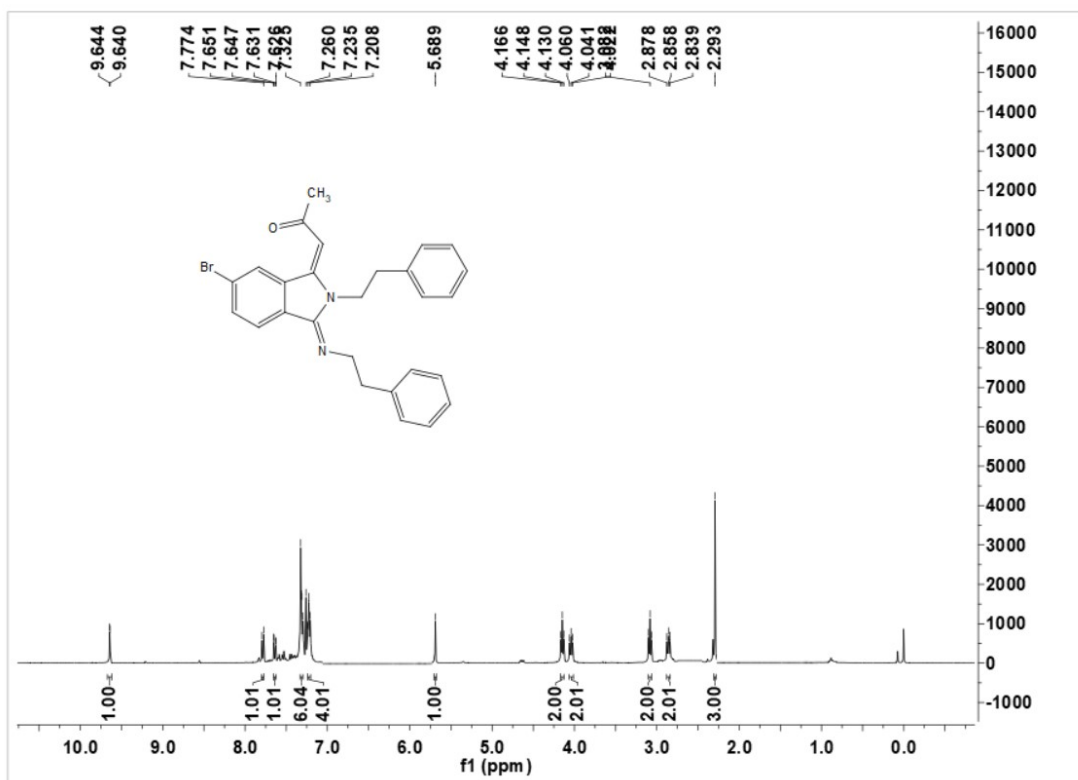

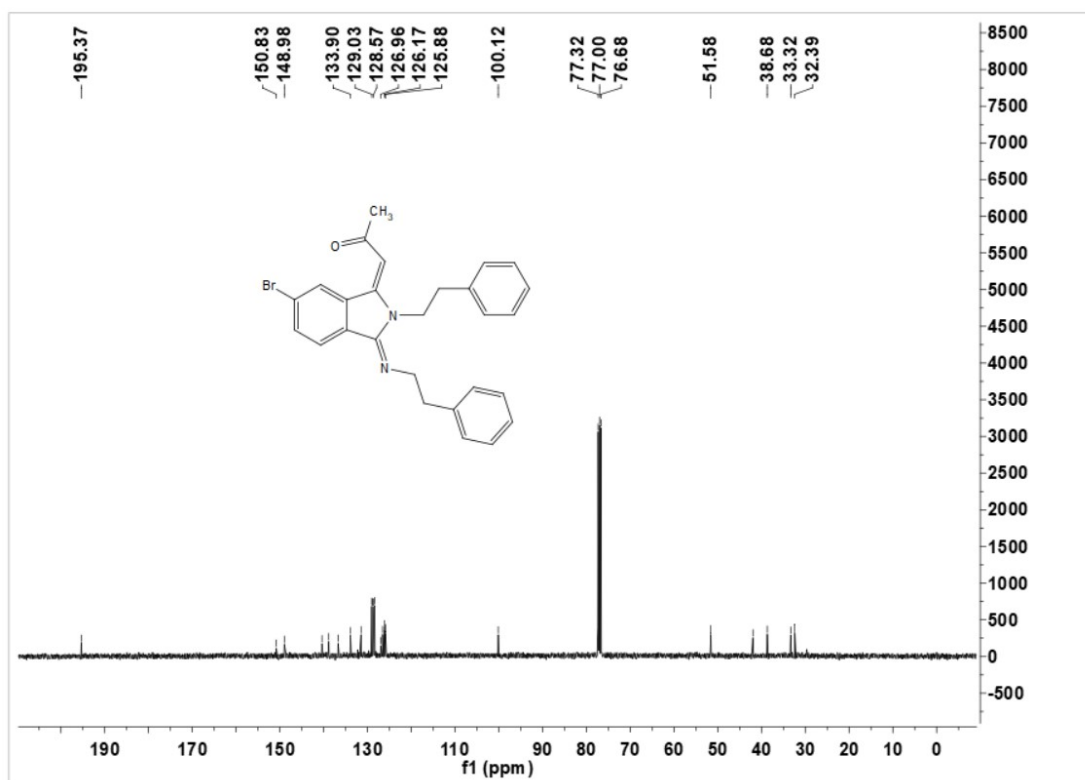

1-((1*E*,3*Z*)-6-Methyl-2-(2-(thiophen-2-yl)ethyl)-3-((2-(thiophen-2-yl)ethyl)imino)isoindolin-1-ylidene)propan-2-one (8zd)

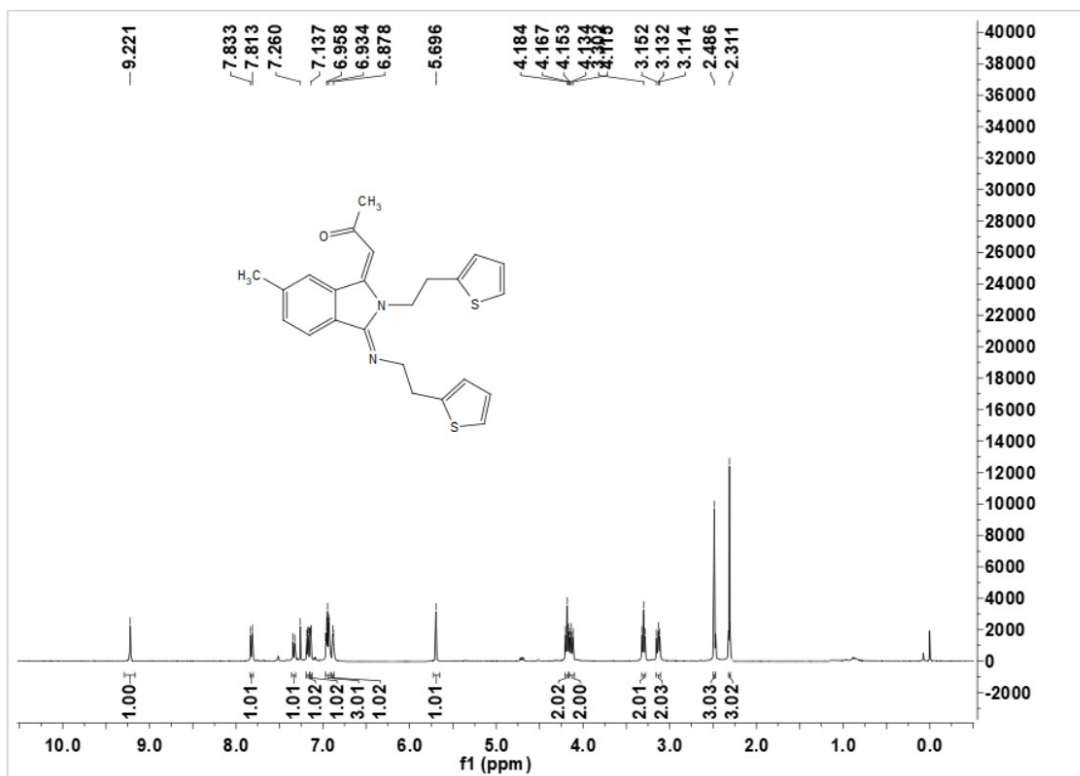

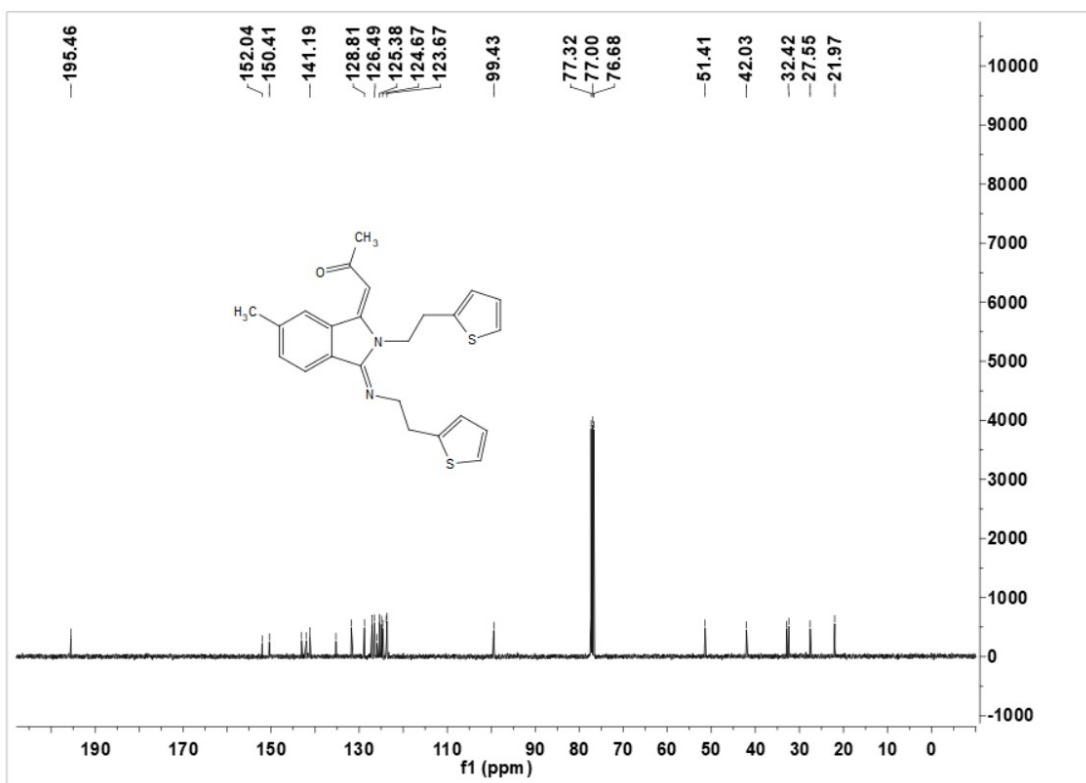

**1-((1E,3Z)-2-(3,4-Dimethoxyphenethyl)-3-((3,4-dimethoxyphenethyl)imino)-6-methyl-isoindolin-1-ylidene)propan-2-one (8ze)**

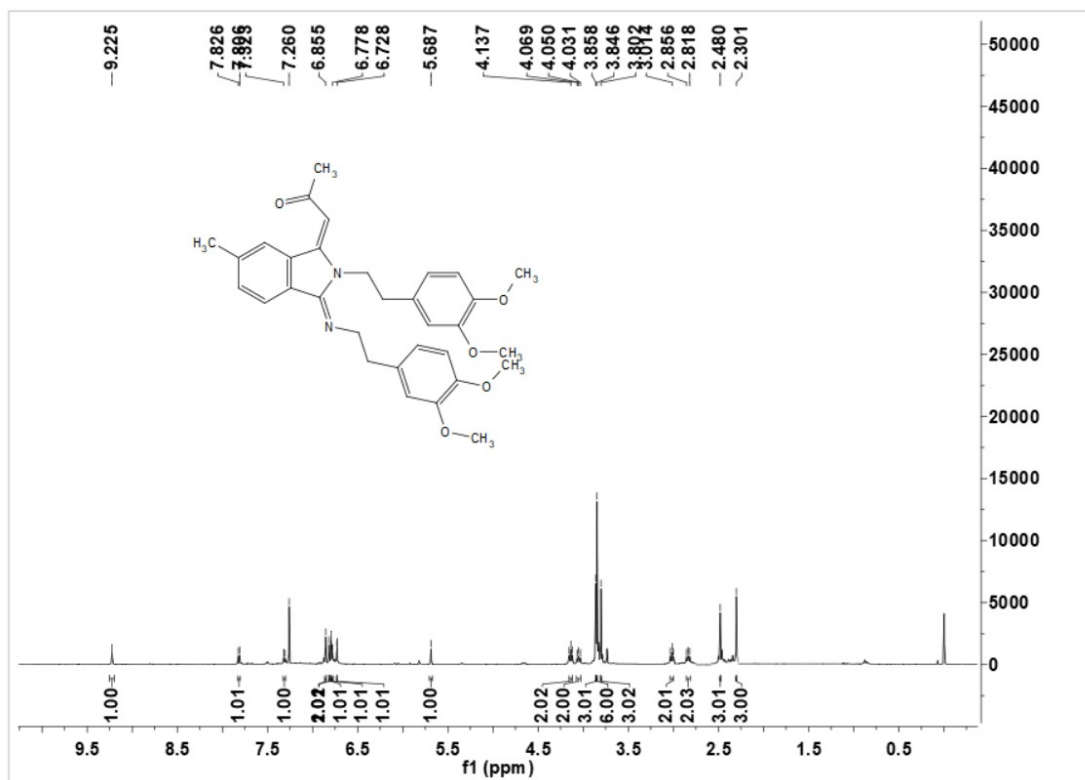

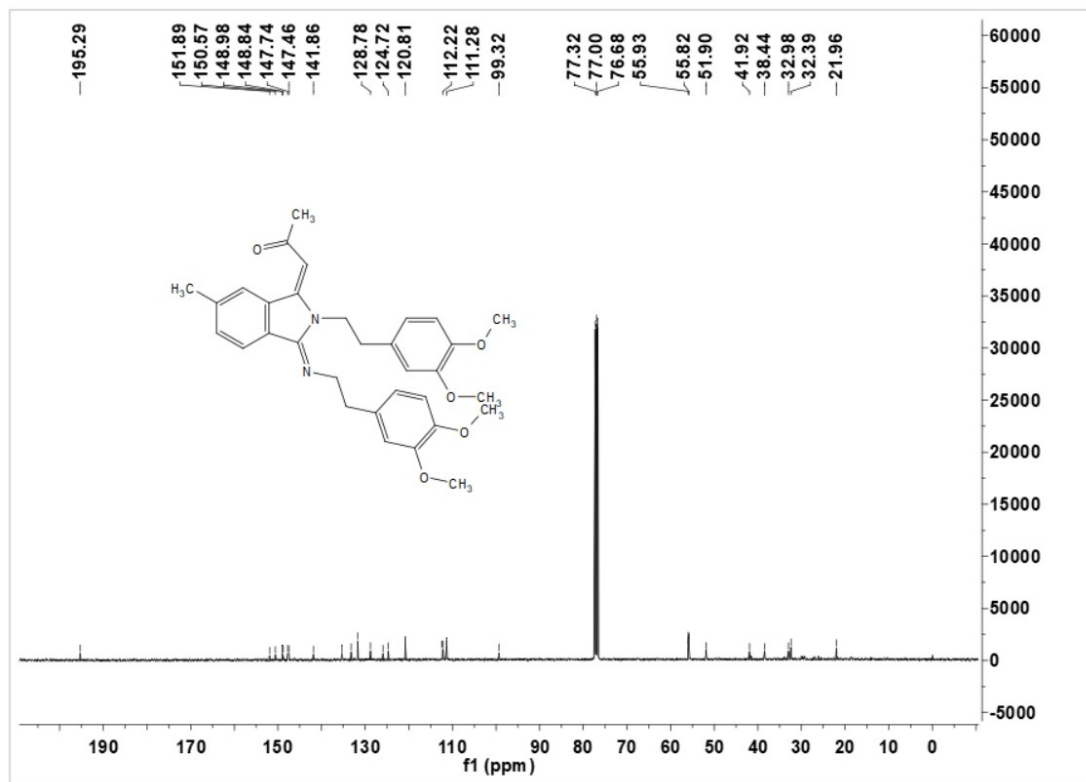

1-((1*E*,3*E*)-2-(4-Methoxyphenyl)-3-((4-methoxyphenyl)imino)-6-(pyrimidin-2-yloxy)isoindolin-1-ylidene)propan-2-one (8zf)

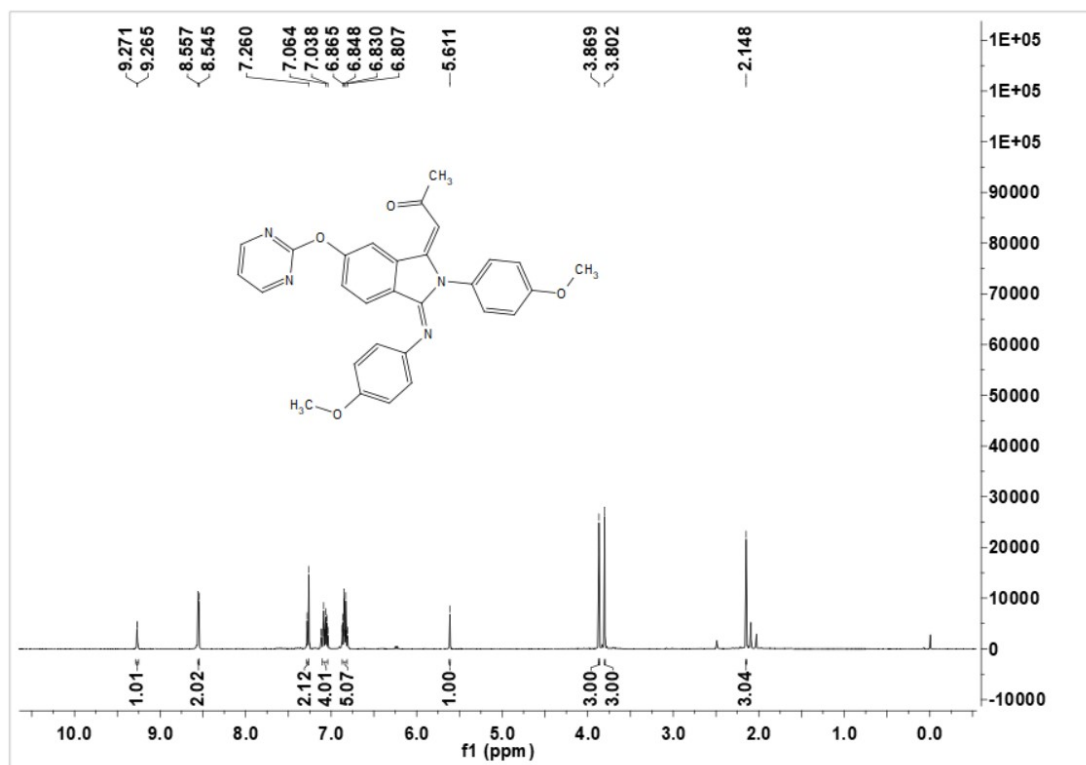

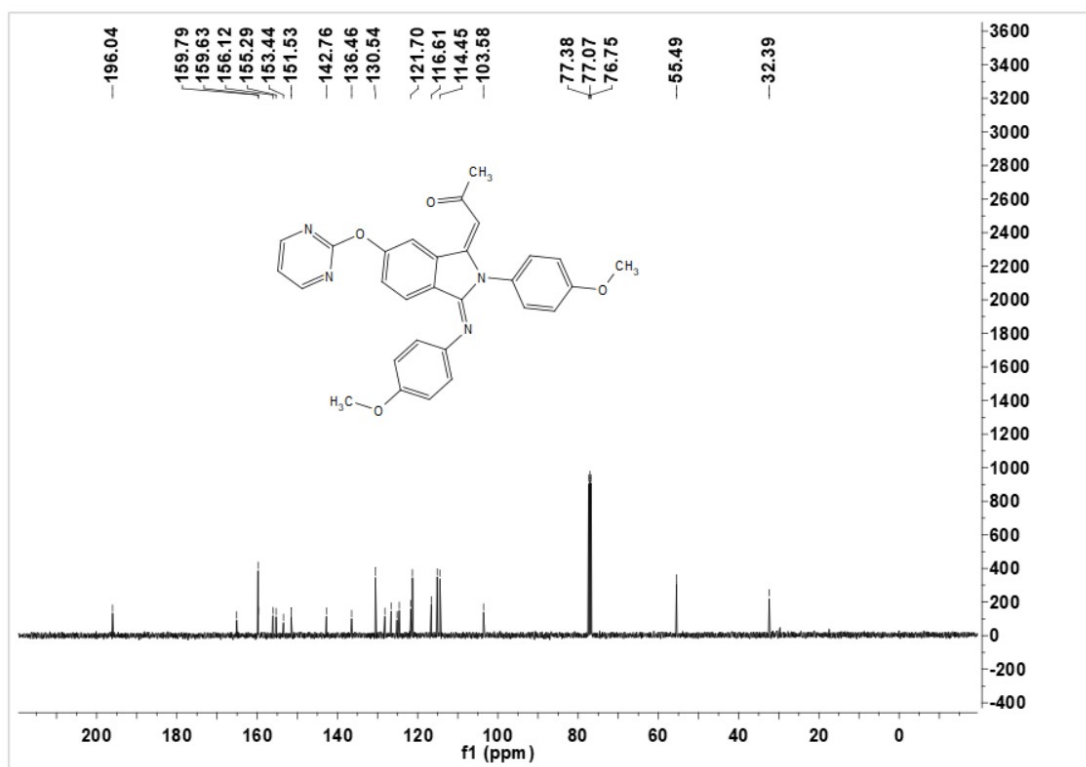

**(E)-1-((E)-5-(4-Methoxyphenyl)-6-((4-methoxyphenyl)imino)-5,6-dihydro-4H-thieno[2,3-c]pyrrol-4-ylidene)propan-2-one (8zg)**

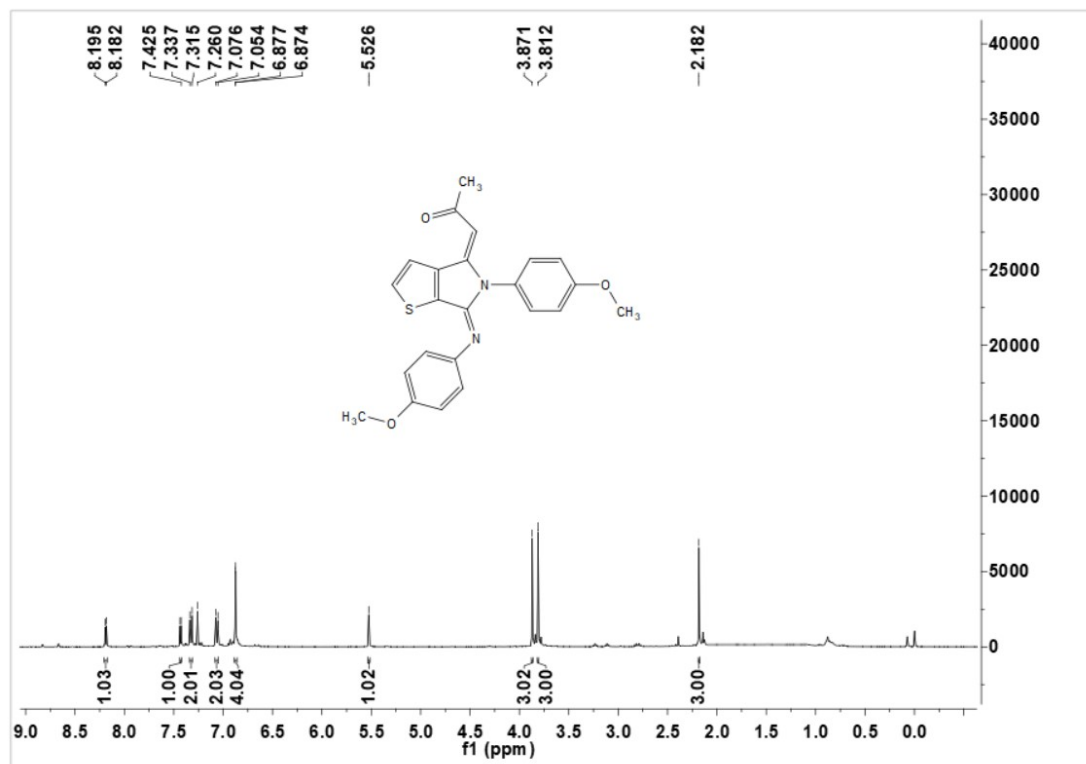



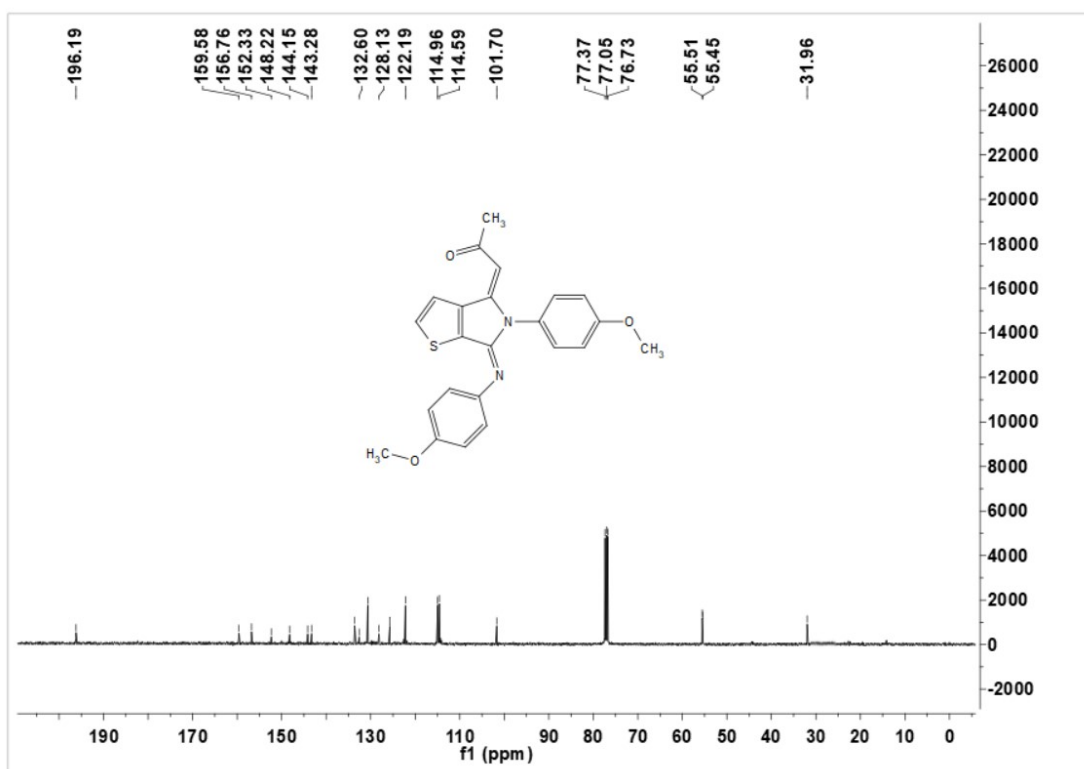

**(1E,3E)-2-(4-Methoxyphenyl)-1-((4-methoxyphenyl)imino)-3-(2-oxopropylidene)-N,N-dipropylisoindoline-5-sulfonamide (8zh)**

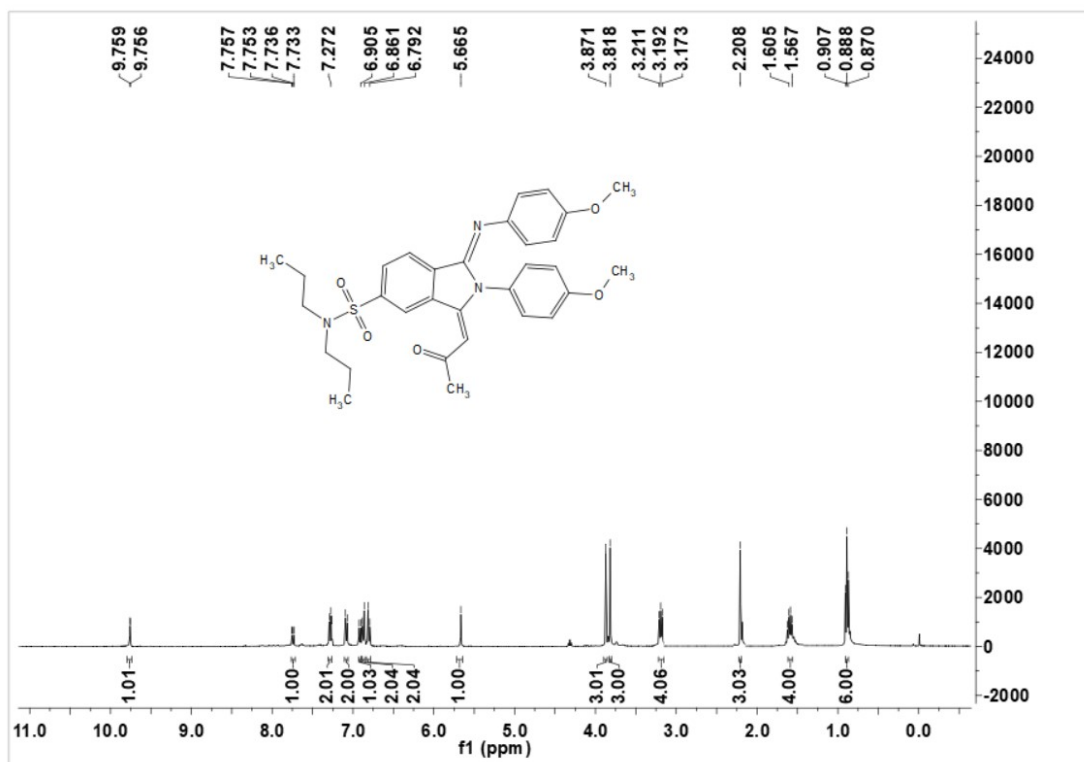

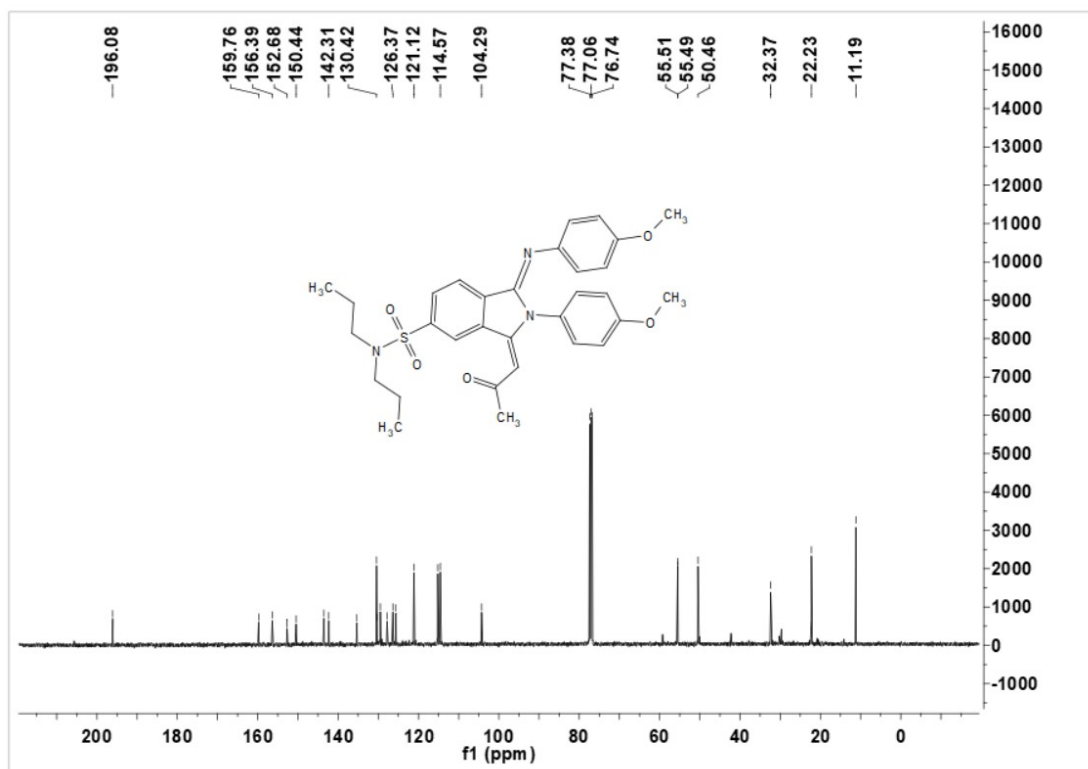

**4-Chlorophenyl (E)-2-((Z)-2-(4-methoxyphenyl)-1-((4-methoxyphenyl)imino)-1,2-dihydro-3H-pyrrolo[3,4-c]pyridin-3-ylidene)acetate (8zi)**

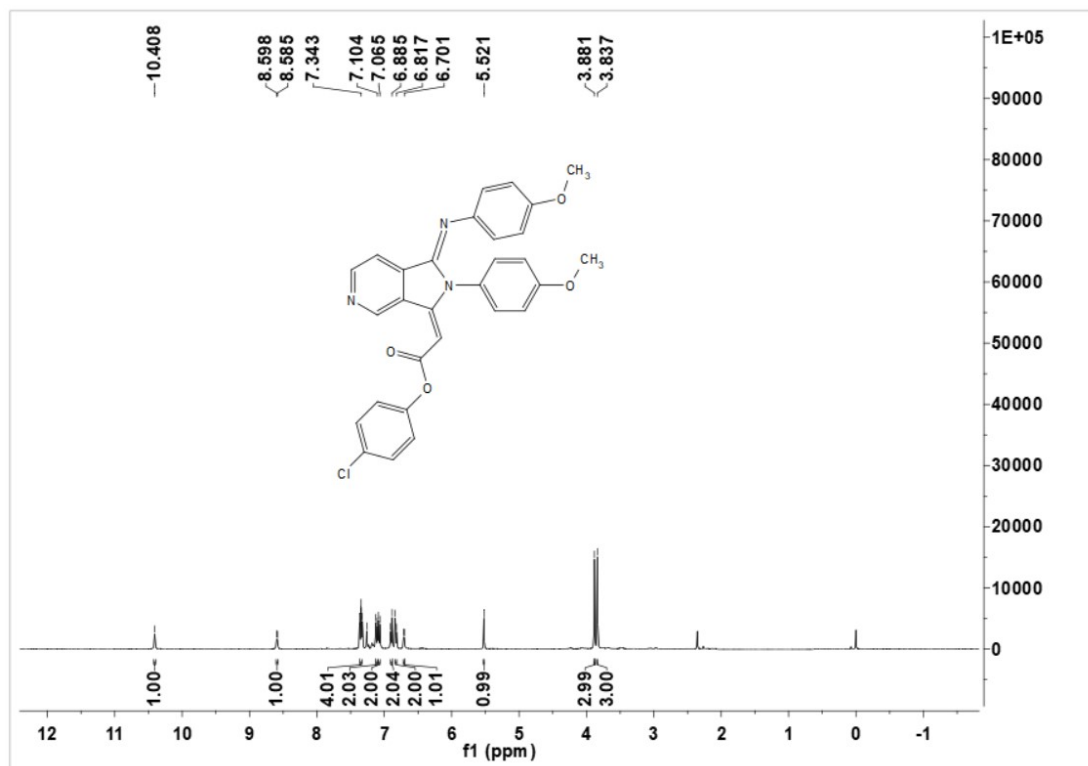

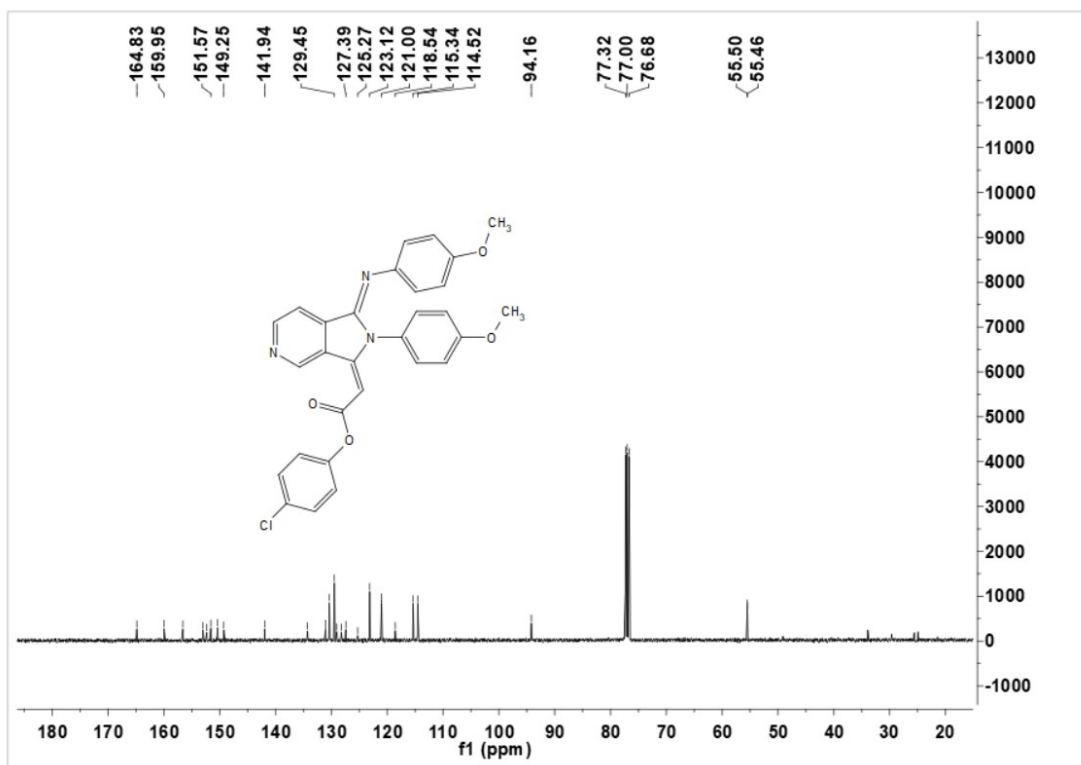

**4-Bromophenyl (E)-2-((Z)-2-(4-methoxyphenyl)-1-((4-methoxyphenyl)imino)-1,2-dihydro-3H-pyrrolo[3,4-c]pyridin-3-ylidene)acetate (8zj)**

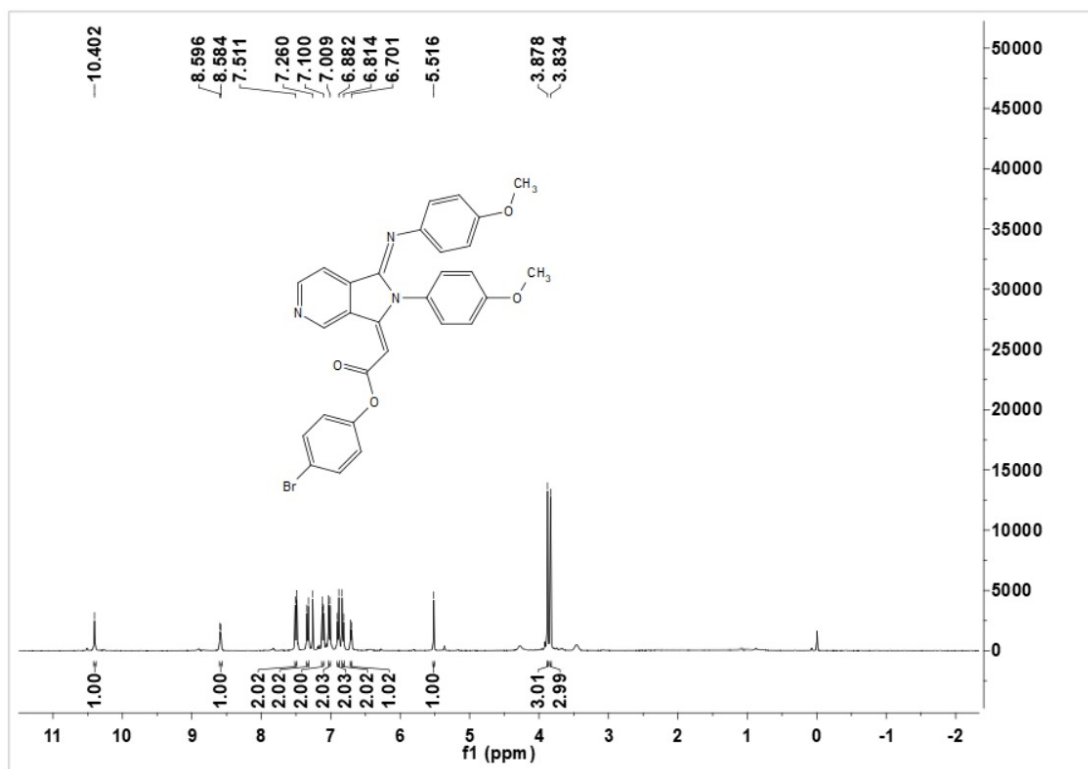

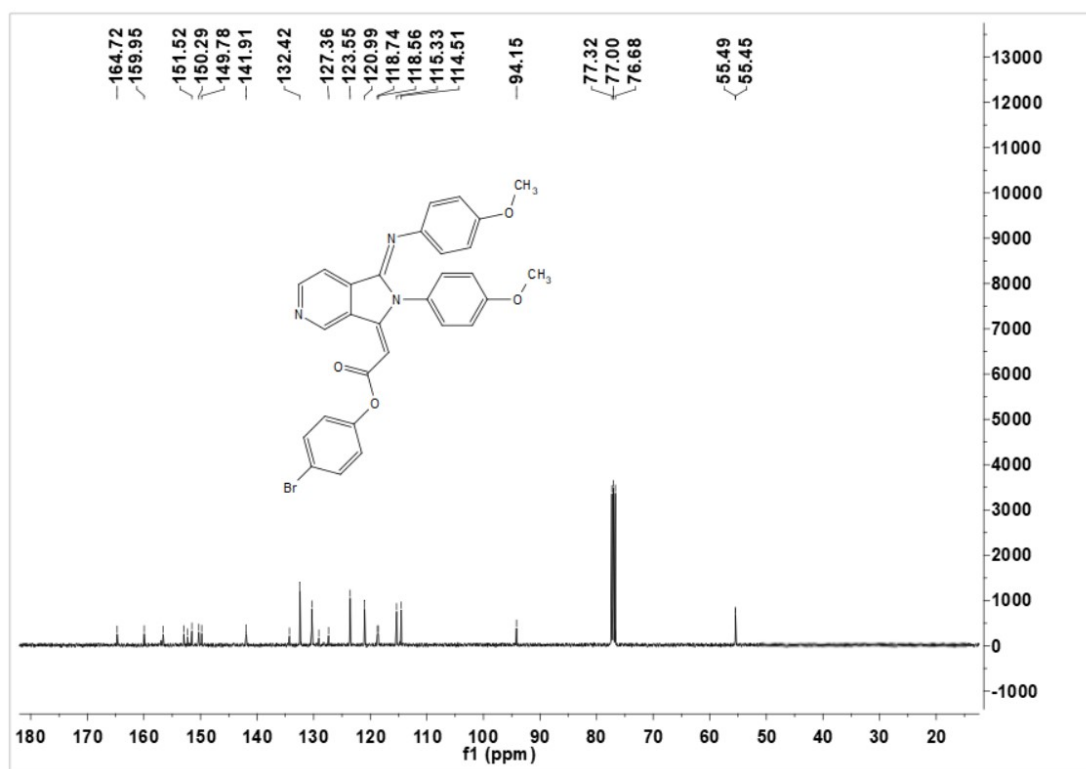

**4-Acetylphenyl (*E*)-2-((*Z*)-2-(4-methoxyphenyl)-1-((4-methoxyphenyl)imino)-1,2-dihydro-3*H*-pyrrolo[3,4-*c*]pyridin-3-ylidene)acetate (8zk)**

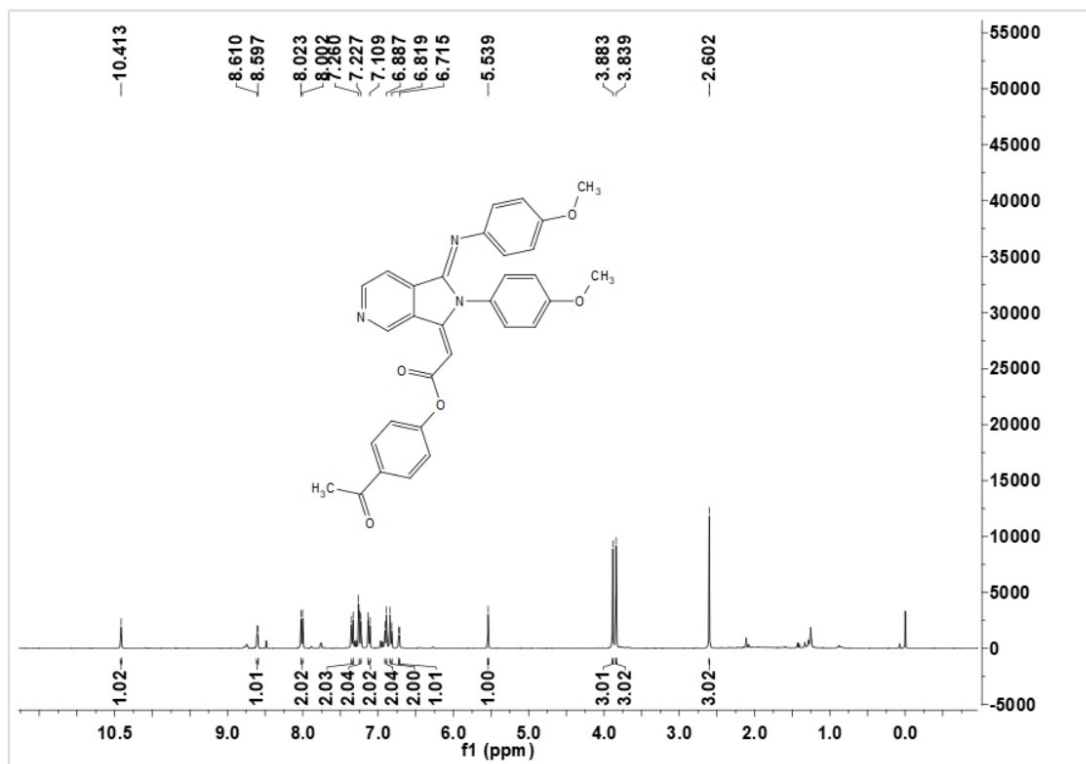

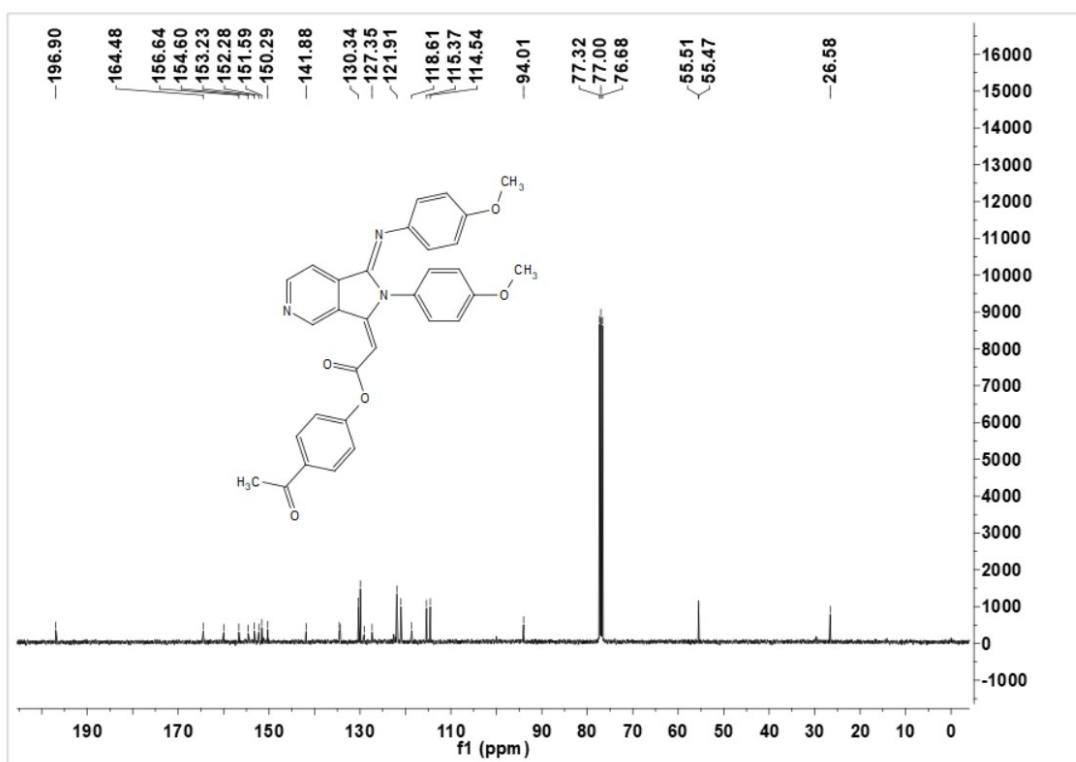

**4-Methoxyphenyl (E)-2-((Z)-2-(4-methoxyphenyl)-1-((4-methoxyphenyl)imino)-1,2-dihydro-3H-pyrrolo[3,4-c]pyridin-3-ylidene)acetate (8zl)**

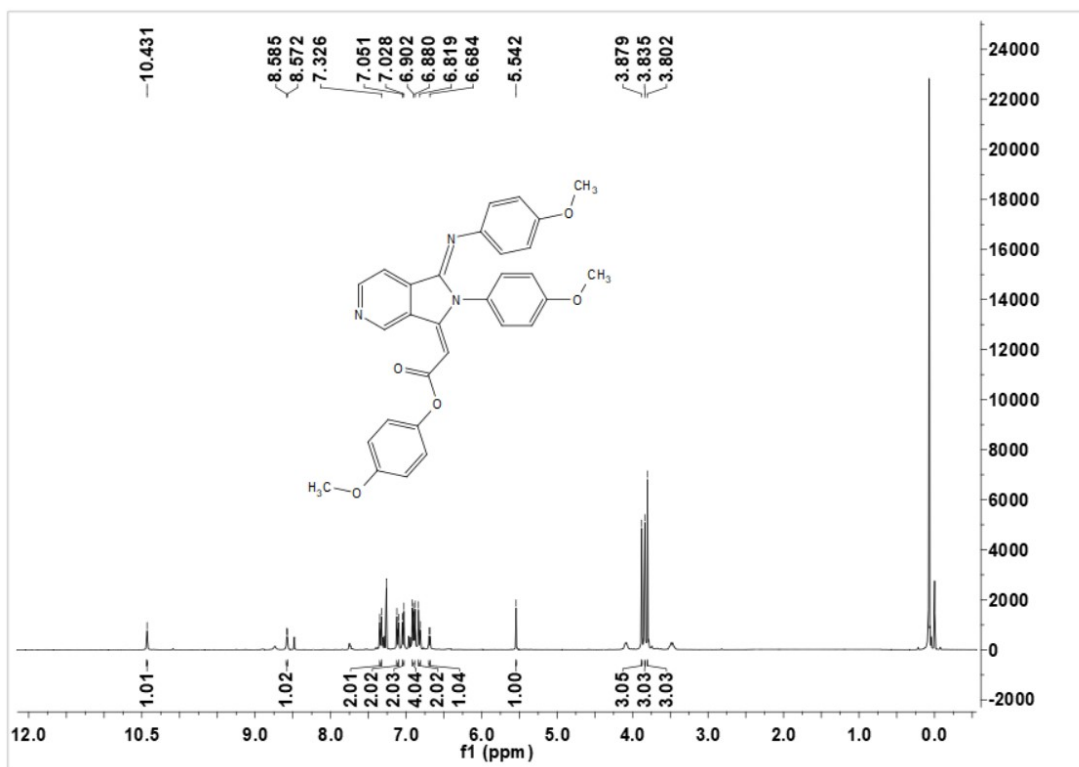

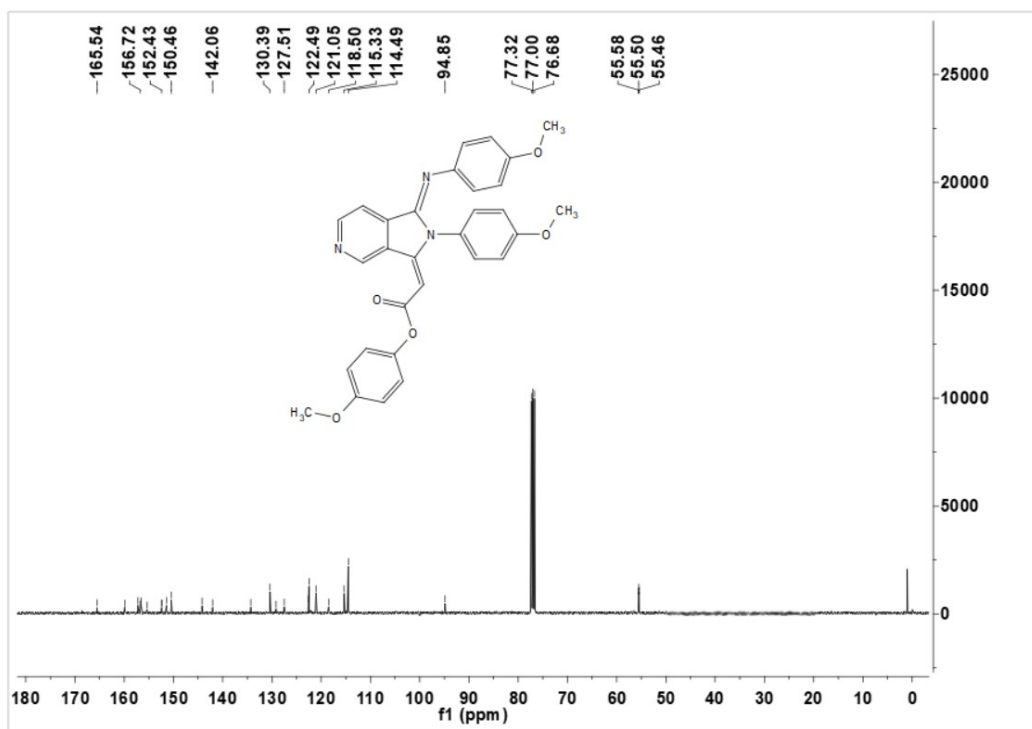

(8*R*,9*S*,13*S*,14*S*)-13-Methyl-17-oxo-7,8,9,11,12,13,14,15,16,17-decahydro-6*H*-cyclopenta[*a*]phenanthren-3-yl (*E*)-2-((*Z*)-2-(4-methoxyphenyl)-1-((4-methoxyphenyl)imino)-1,2-dihydro-3*H*-pyrrolo[3,4-*c*]pyridin-3-ylidene)acetate (8zm)

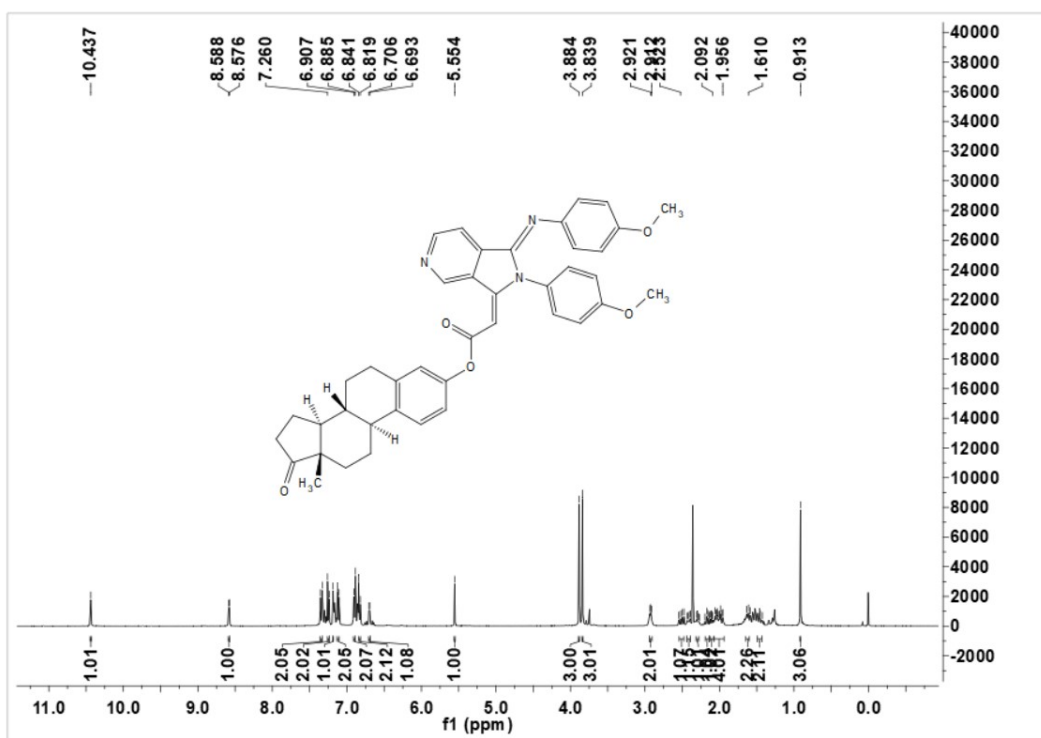

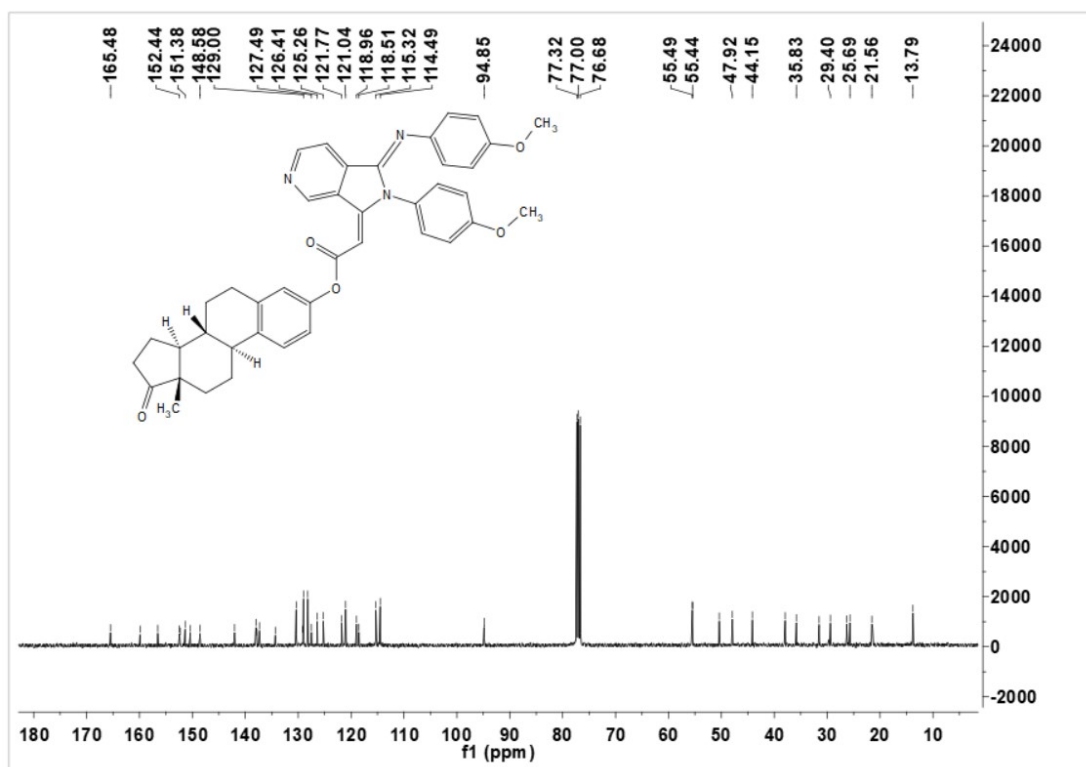

**4-Chlorophenyl (*E*)-2-((*E*)-2-(*p*-tolyl)-1-(*p*-tolylimino)-1,2-dihydro-3*H*-pyrrolo[3,4-*c*]quinolin-3-ylidene)acetate (8zn)**

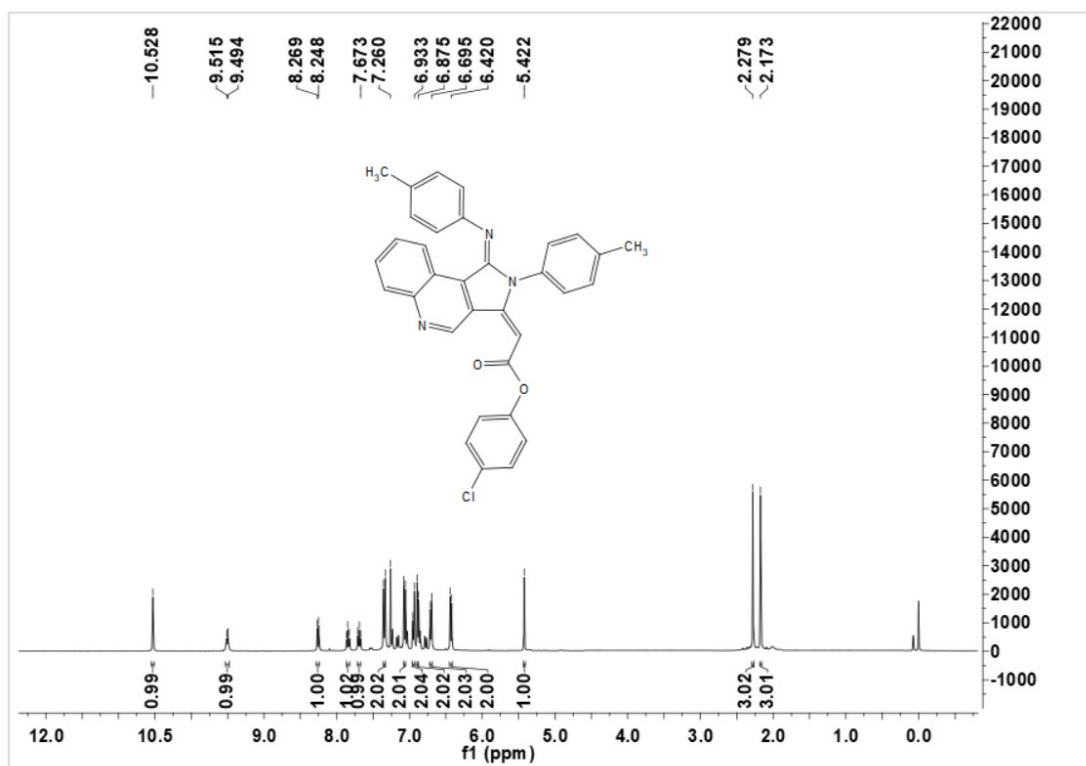

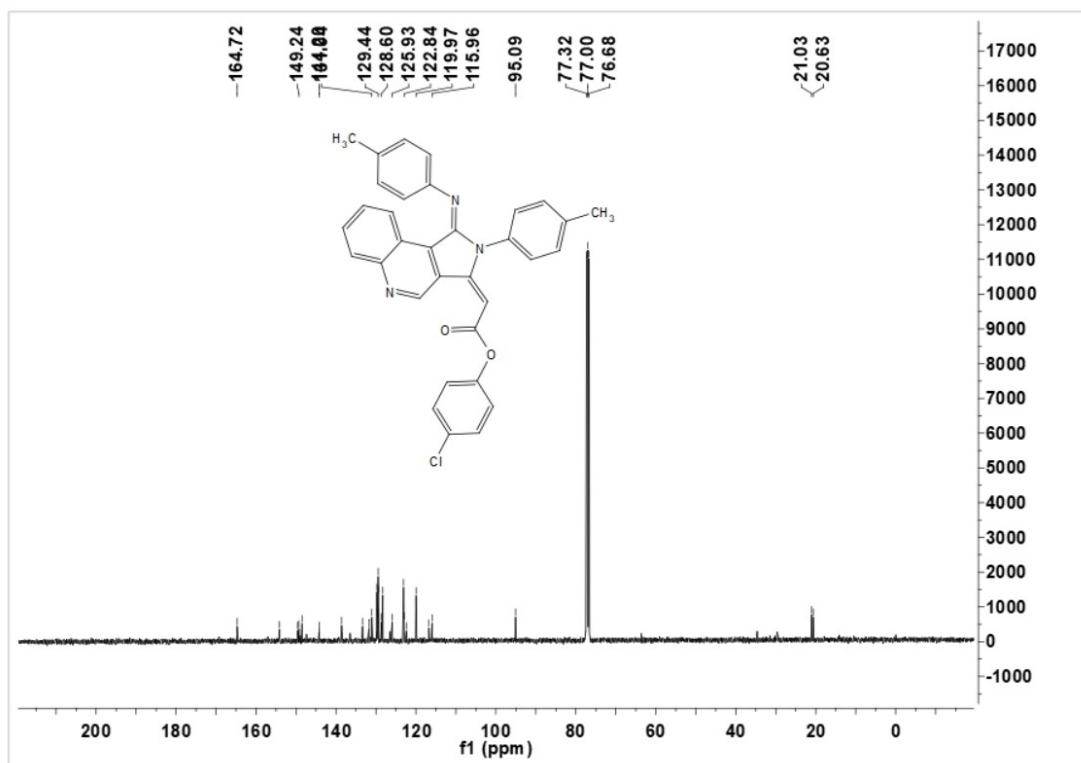

4-Acetylphenyl (*E*)-2-((*E*)-2-(*p*-tolyl)-1-(*p*-tolylimino)-1,2-dihydro-3*H*-pyrrolo[3,4-*c*]quinolin-3-ylidene)acetate (8zo)

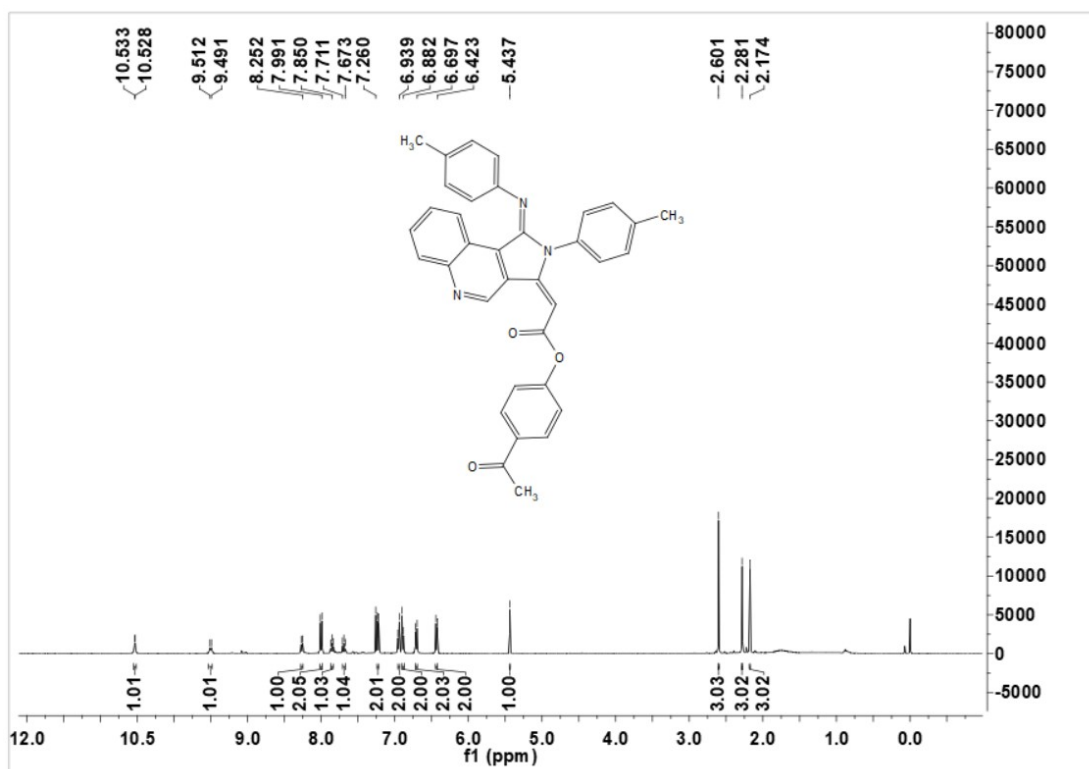



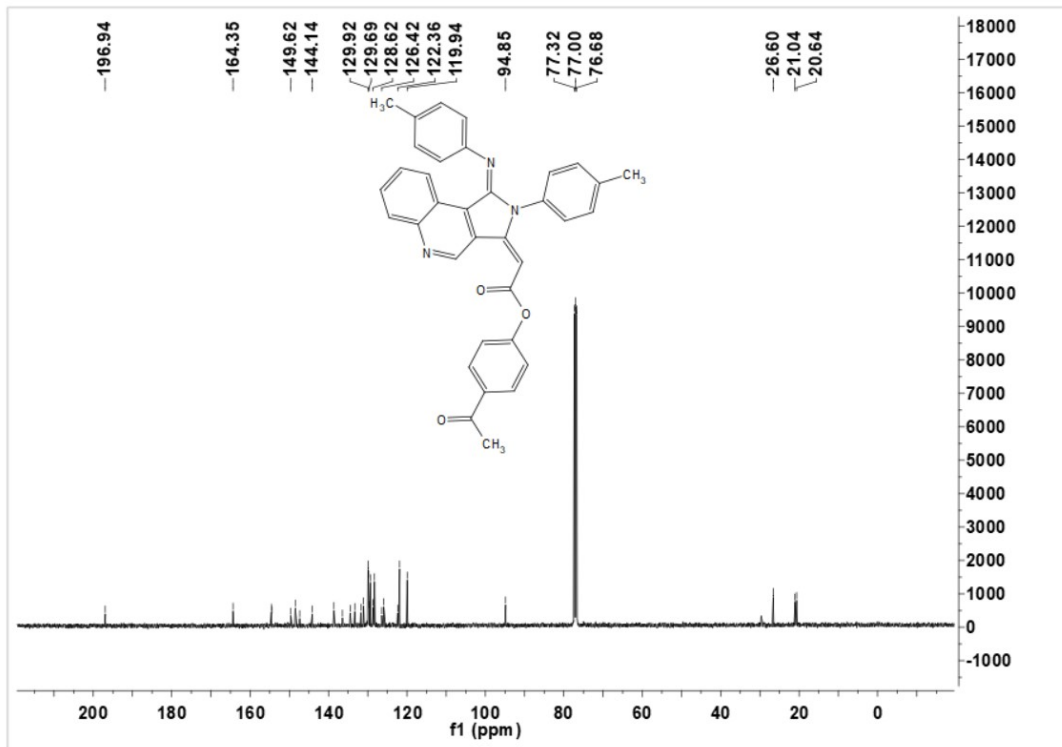

2-((1*E*,3*Z*)-6-(*N,N*-Dipropylsulfamoyl)-2-(4-methoxyphenyl)-3-((4-methoxyphenyl)imino)isoindolin-1-ylidene)-*N,N*-dimethylacetamide (10a)

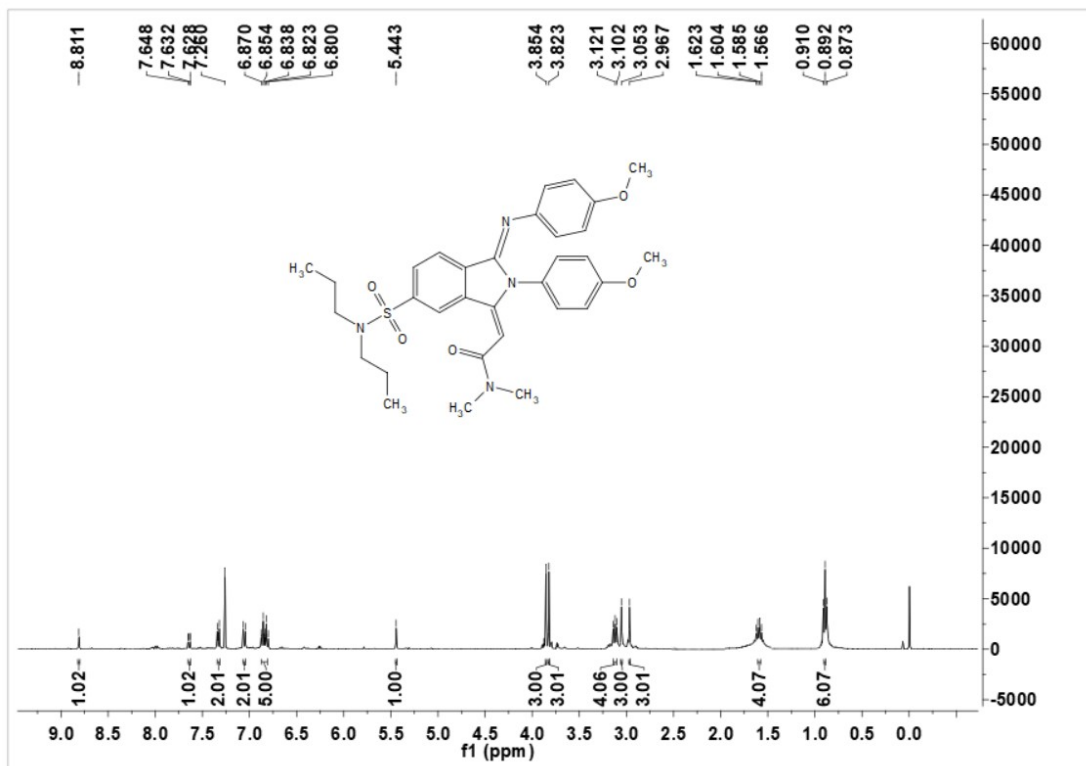

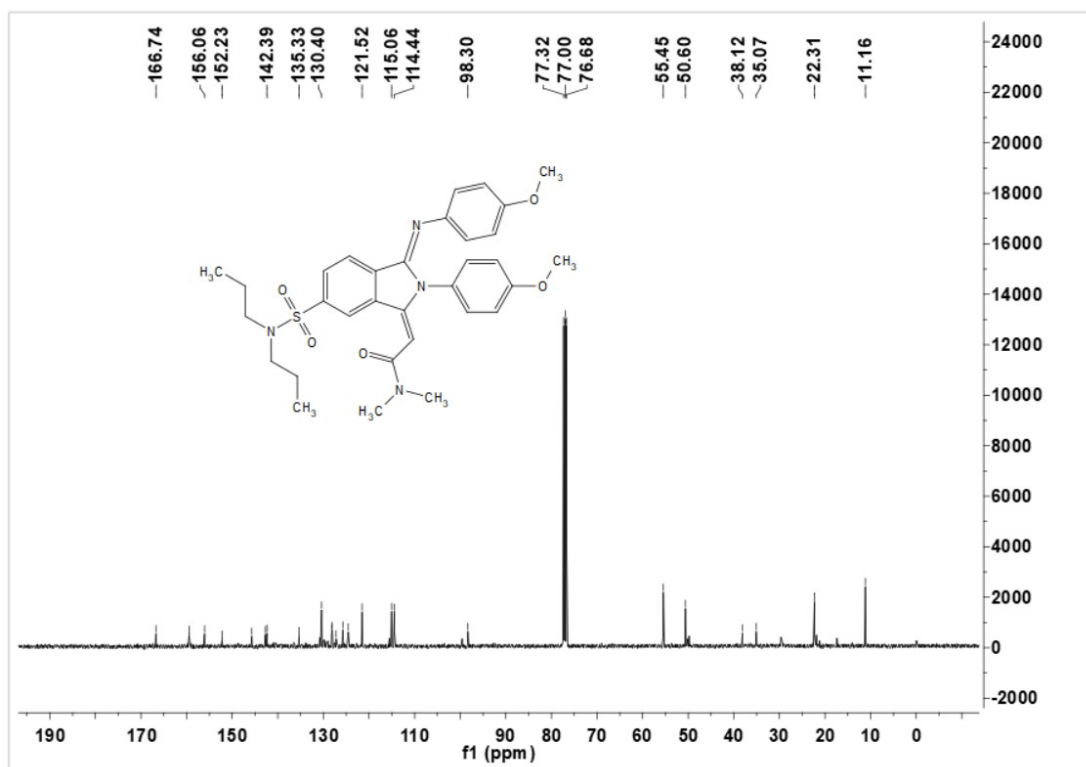

**Dimethyl (*E*)-7-(*N,N*-dipropylsulfamoyl)-1-(2-methoxy-2-oxoethyl)-5-(3-methoxy-3-oxoprop-1-en-1-yl)-9-(4-methoxyphenyl)-1,4-dihydro-1,4-epiminonaphthalene-2,3-dicarboxylate (6w-I)**

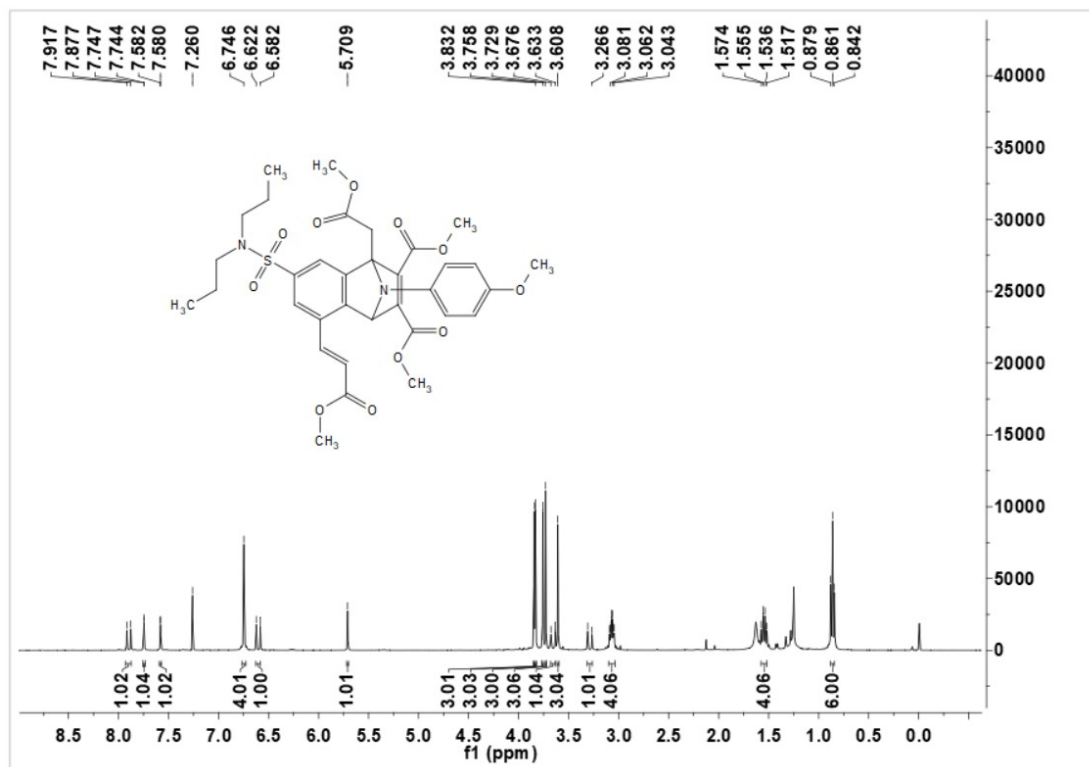

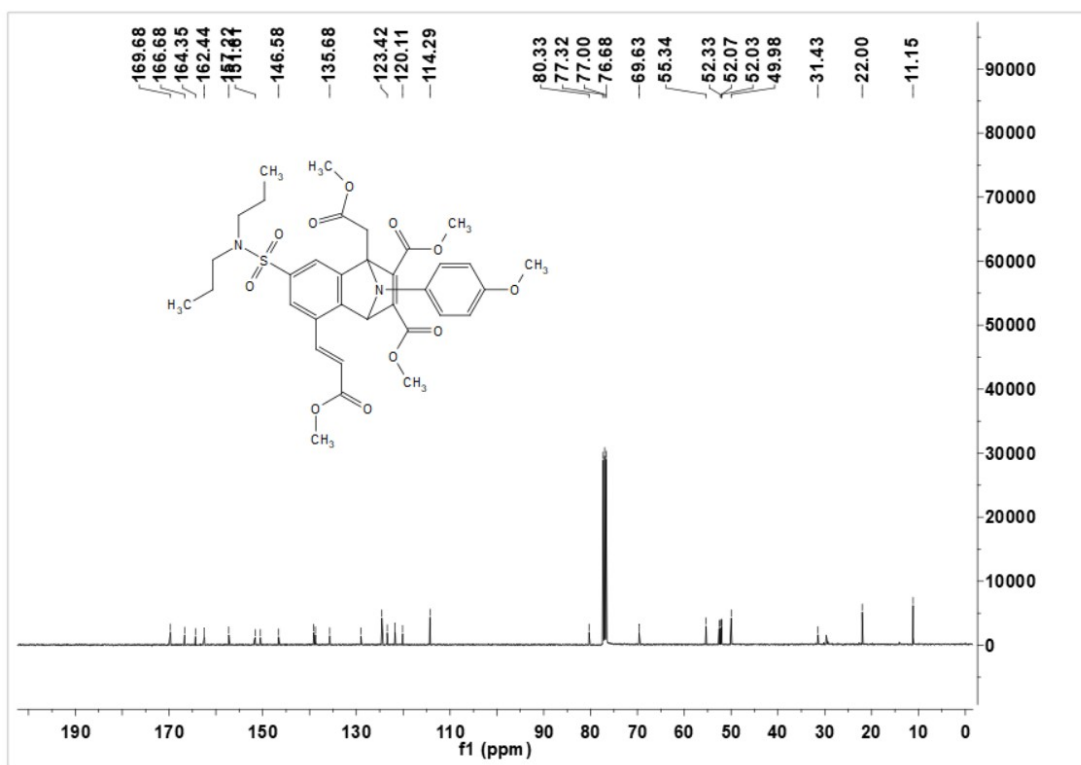

**Methyl (E)-3-((E)-6-(N,N-dipropylsulfamoyl)-1-(2-methoxy-2-oxoethylidene)-2-(4-methoxyphenyl)-3-oxoisindolin-4-yl)acrylate (6w-II)**

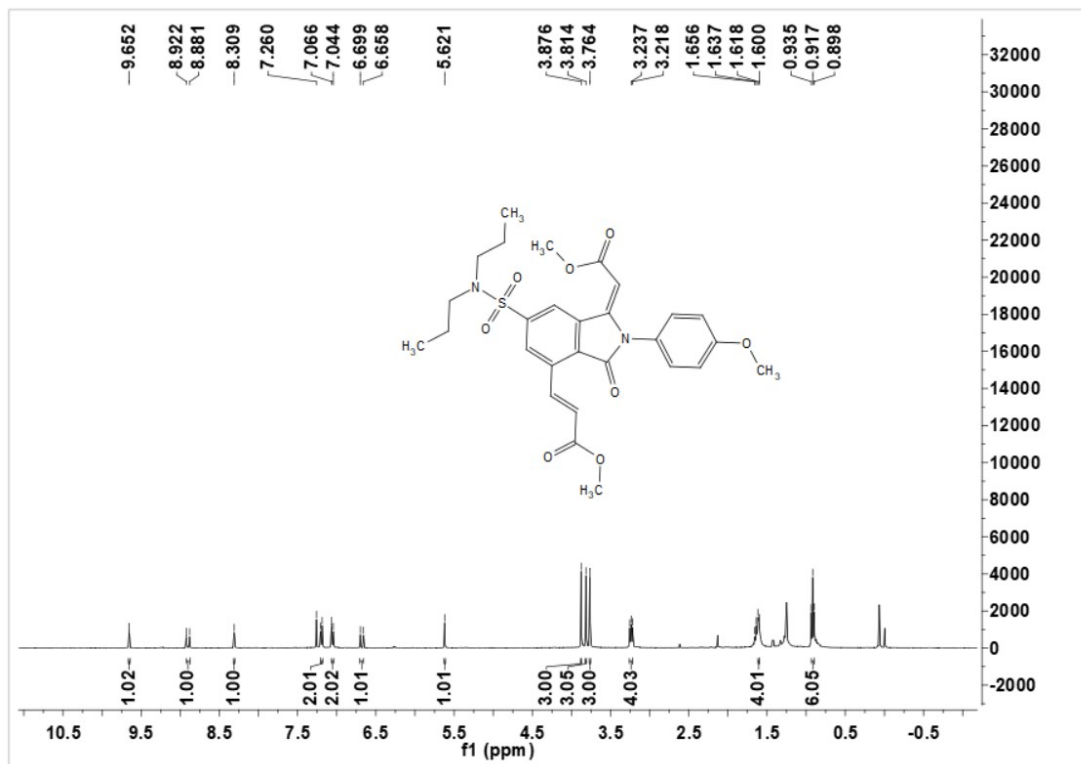

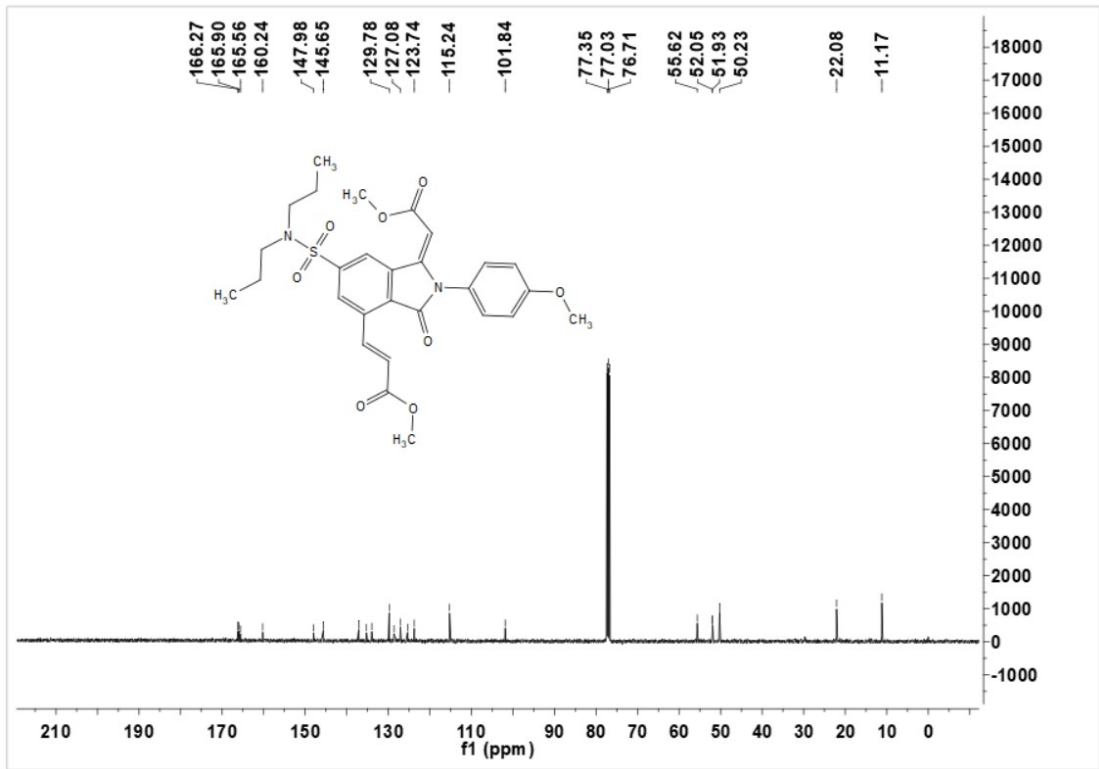

## Crystal Structure of Product 4t

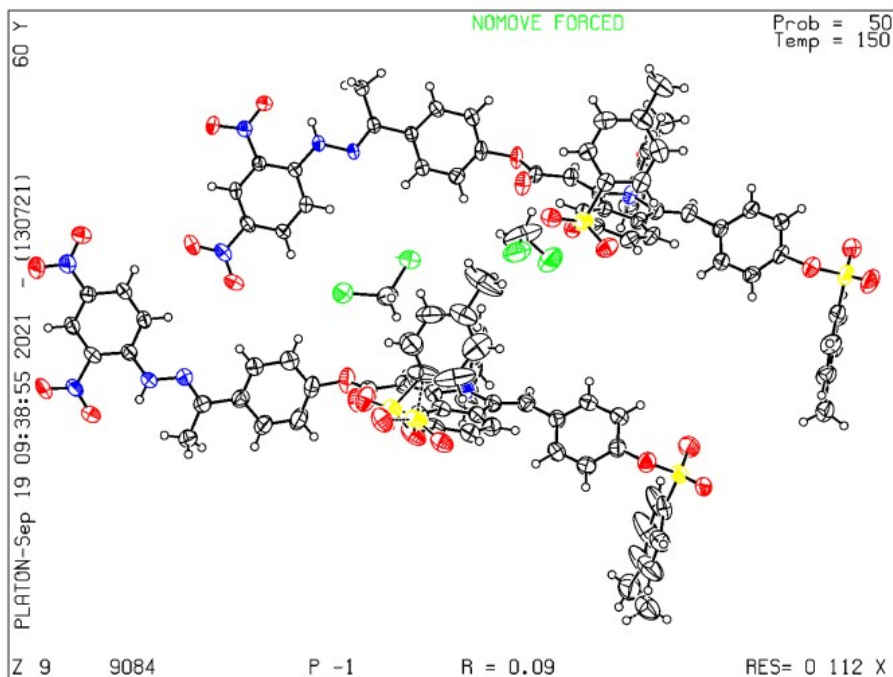

### Datablock: 9084

|                                                               |                                                                       |                                     |
|---------------------------------------------------------------|-----------------------------------------------------------------------|-------------------------------------|
| Bond precision:                                               | C-C = 0.0082 A                                                        | Wavelength=1.54184                  |
| Cell:                                                         | a=15.8575(8)                                                          | b=16.5558(7) c=20.4664(6)           |
|                                                               | alpha=76.816(3)                                                       | beta=77.046(4) gamma=84.138(4)      |
| Temperature:                                                  | 150 K                                                                 |                                     |
|                                                               | Calculated                                                            | Reported                            |
| Volume                                                        | 5091.0(4)                                                             | 5091.0(4)                           |
| Space group                                                   | P -1                                                                  | P -1                                |
| Hall group                                                    | -P 1                                                                  | -P 1                                |
| Moiety formula                                                | C51.59 H39.77 N5 O13 S2,<br>C52 H41 N5 O13 S2, 2(C H2<br>C12), 0.41(C | C H2 C12, C52 H41 N5 O13 S2         |
| Sum formula                                                   | C106 H86 C14 N10 O26 S4                                               | C53 H43 C12 N5 O13 S2               |
| Mr                                                            | 2185.89                                                               | 1092.94                             |
| Dx, g cm-3                                                    | 1.426                                                                 | 1.426                               |
| Z                                                             | 2                                                                     | 4                                   |
| Mu (mm-1)                                                     | 2.517                                                                 | 2.517                               |
| F000                                                          | 2264.0                                                                | 2264.0                              |
| F000'                                                         | 2276.32                                                               |                                     |
| h, k, lmax                                                    | 19, 20, 25                                                            | 19, 20, 25                          |
| Nref                                                          | 20668                                                                 | 19671                               |
| Tmin, Tmax                                                    | 0.738, 0.777                                                          | 0.636, 1.000                        |
| Tmin'                                                         | 0.670                                                                 |                                     |
| Correction method= # Reported T Limits: Tmin=0.636 Tmax=1.000 |                                                                       |                                     |
| AbsCorr = MULTI-SCAN                                          |                                                                       |                                     |
| Data completeness=                                            | 0.952                                                                 | Theta(max)= 73.990                  |
| R(reflections)=                                               | 0.0897( 12019)                                                        | wR2(reflections)=<br>0.2764( 19671) |
| S =                                                           | 1.047                                                                 | Npar= 1398                          |

## Crystal Structure of Product 6w

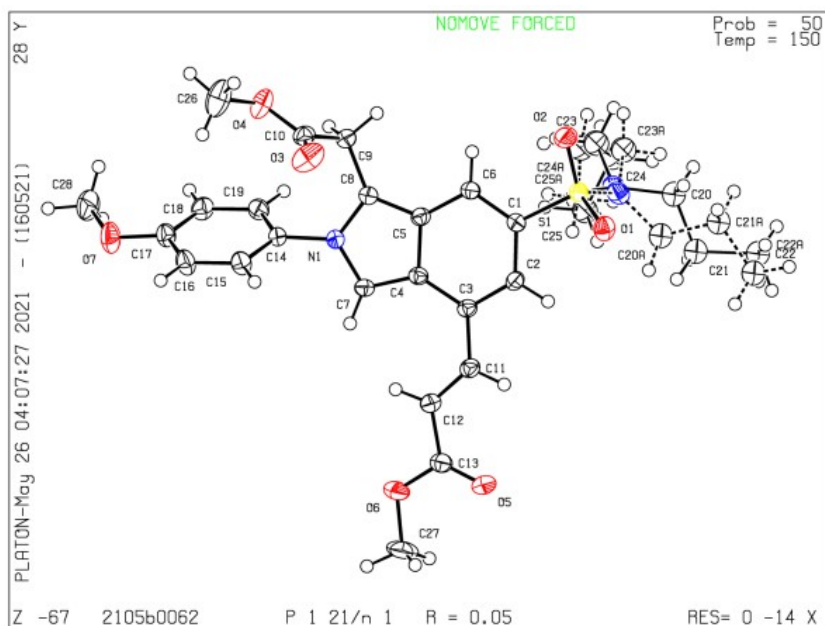

### Datablock: 2105b0062

|                        |                                          |                                  |               |
|------------------------|------------------------------------------|----------------------------------|---------------|
| Bond precision:        | C-C = 0.0030 Å                           | Wavelength=1.54184               |               |
| Cell:                  | a=12.6360 (2)                            | b=17.5646 (3)                    | c=12.7053 (3) |
|                        | alpha=90                                 | beta=101.1316 (18)               | gamma=90      |
| Temperature:           | 150 K                                    |                                  |               |
|                        | Calculated                               | Reported                         |               |
| Volume                 | 2766.84 (9)                              | 2766.84 (9)                      |               |
| Space group            | P 21/n                                   | P 1 21/n 1                       |               |
| Hall group             | -P 2yn                                   | -P 2yn                           |               |
| Moiety formula         | C28 H34 N2 O7 S                          | C28 H34 N2 O7 S                  |               |
| Sum formula            | C28 H34 N2 O7 S                          | C28 H34 N2 O7 S                  |               |
| Mr                     | 542.63                                   | 542.63                           |               |
| Dx, g cm <sup>-3</sup> | 1.303                                    | 1.303                            |               |
| Z                      | 4                                        | 4                                |               |
| Mu (mm <sup>-1</sup> ) | 1.443                                    | 1.443                            |               |
| F000                   | 1152.0                                   | 1152.0                           |               |
| F000'                  | 1156.84                                  |                                  |               |
| h, k, lmax             | 15, 21, 15                               | 15, 21, 15                       |               |
| Nref                   | 5515                                     | 5396                             |               |
| Tmin, Tmax             | 0.771, 0.853                             | 0.923, 1.000                     |               |
| Tmin'                  | 0.728                                    |                                  |               |
| Correction method= #   | Reported T Limits: Tmin=0.923 Tmax=1.000 |                                  |               |
| AbsCorr =              | MULTI-SCAN                               |                                  |               |
| Data completeness=     | 0.978                                    | Theta (max)= 72.760              |               |
| R(reflections)=        | 0.0533 ( 4774)                           | wR2(reflections)= 0.1402 ( 5396) |               |
| S =                    | 1.048                                    | Npar= 349                        |               |

## Crystal Structure of Product 8q

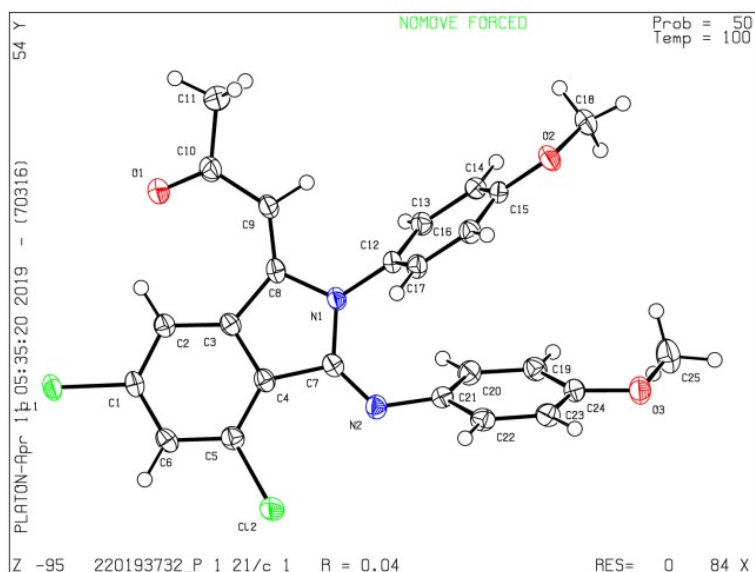

### Datablock: 220193732\_0m

Bond precision: C-C = 0.0022 Å      Wavelength=0.71073

Cell:                    a=7.8118(3)      b=11.4664(5)      c=24.3378(8)  
                           alpha=90            beta=97.242(1)      gamma=90

Temperature:            100 K

|                        | Calculated        | Reported          |
|------------------------|-------------------|-------------------|
| Volume                 | 2162.62(14)       | 2162.62(14)       |
| Space group            | P 21/c            | P 1 21/c 1        |
| Hall group             | -P 2ybc           | -P 2ybc           |
| Moiety formula         | C25 H20 Cl2 N2 O3 | C25 H20 Cl2 N2 O3 |
| Sum formula            | C25 H20 Cl2 N2 O3 | C25 H20 Cl2 N2 O3 |
| Mr                     | 467.33            | 467.33            |
| Dx, g cm <sup>-3</sup> | 1.435             | 1.435             |
| Z                      | 4                 | 4                 |
| Mu (mm <sup>-1</sup> ) | 0.332             | 0.332             |
| F000                   | 968.0             | 968.0             |
| F000'                  | 969.56            |                   |
| h, k, lmax             | 10, 14, 31        | 10, 14, 31        |
| Nref                   | 4959              | 4944              |
| Tmin, Tmax             | 0.953, 0.974      | 0.669, 0.746      |
| Tmin'                  | 0.951             |                   |

Correction method= # Reported T Limits: Tmin=0.669 Tmax=0.746  
 AbsCorr = MULTI-SCAN

Data completeness= 0.997      Theta(max)= 27.502

R(reflections)= 0.0384( 3937)      wR2(reflections)= 0.0989( 4944)

S = 1.068      Npar= 292
